# Supplementary material for: Metal-free direct alkylation of unfunctionalized allylic/benzylic sp3C–H bonds via photoredox induced radical cation deprotonation
Source: Royal Society of Chemistry journal article supplement (doi:10.1039/c7sc00953d), 2017-01-01

# Metal-free direct alkylation of unfunctionalized allylic/benzylic $sp^3$ C–H bonds via photoredox induced radical cation deprotonation

Rong Zhou,<sup>a,b</sup> Haiwang Liu,<sup>a</sup> Hairong Tao,<sup>c</sup> Xingjian Yu<sup>a</sup> and Jie Wu<sup>\*a</sup>

<sup>a</sup> Department of Chemistry, National University of Singapore, 3 Science Drive 3, Republic of Singapore, 117543. E-mail: [chmjie@nus.edu.sg](mailto:chmjie@nus.edu.sg)

<sup>b</sup> College of Chemistry and Chemical Engineering, Taiyuan University of Technology, Taiyuan, China, 030024.

<sup>c</sup> College of Chemistry, Beijing Normal University, Beijing, China.

## Table of Contents

|                                                                                                             |      |
|-------------------------------------------------------------------------------------------------------------|------|
| I. General Information .....                                                                                | S2   |
| II. Survey of Reaction Conditions .....                                                                     | S2   |
| III. Typical Procedure for Alkylation of Allylic $sp^3$ C–H Bonds in Batch .....                            | S3   |
| IV. Typical Procedure for Alkylation of Allylic $sp^3$ C–H Bonds in “Stop-Flow Micro Tubing” Reactor .....  | S4   |
| V. Typical Procedure for Alkylation of Benzylic $sp^3$ C–H Bonds in Batch .....                             | S5   |
| VI. Typical Procedure for Alkylation of Benzylic $sp^3$ C–H Bonds in “Stop-Flow Micro Tubing” Reactor ..... | S5   |
| VII. Large-Scale Continuous-Flow Synthesis of Compound <b>7</b> .....                                       | S6   |
| VIII. Control Experiments for Mechanistic Investigation .....                                               | S6   |
| IX. Proposed Mechanism Involving Hydrogen Atom Transfer (HAT) Process and the DFT Calculation Results ..... | S12  |
| X. Analytical Data of the Products .....                                                                    | S16  |
| XI. Supplementary References .....                                                                          | S49  |
| XII. ORTEP Drawings for the Major Diastereomer of <b>41</b> .....                                           | S50  |
| XIII. $^1\text{H}$ , $^{13}\text{C}$ NMR Spectra of Products .....                                          | S52  |
| XIV. NOESY, HMQC, and HMBC Spectra of Representative Compounds .....                                        | S194 |

## I. General Information

Chemicals and solvents were purchased from commercial suppliers and used as received.  $^1\text{H}$  NMR,  $^{13}\text{C}$  NMR spectra were recorded on a Bruker ACF300 (300 MHz), AV-III400 (400 MHz) or AMX500 (500 MHz) spectrometer. Chemical shifts were calibrated using residual undeuterated solvent as an internal reference ( $\text{CDCl}_3$ : 7.26 ppm  $^1\text{H}$  NMR, 77.0 ppm  $^{13}\text{C}$  NMR). Multiplicity was indicated as follows: s (singlet), d (doublet), t (triplet), q (quartet), m (multiplet), dd (doublet of doublet), br s (broad singlet). All high resolution mass spectra (HRMS) were obtained on a Finnigan/MAT 95XL-T spectrometer. All GC analysis was performed on Agilent 7820A&5977E GC-MS. X-ray crystal diffraction data were collected on a Bruker D8 Venture Single Crystal X-ray diffractometer. The Blue LED strips (2 meter, 20 W) were purchased from Inwares Pte Ltd (Singapore). The Asia Syringe Pump was purchased from Syrris Company (UK) for continuous flow setup. The Tefzel shut-off valves, and HPFA micro tubings were purchased from IDEX Health & Science (Oak Harbor, WA). Further visualization was achieved by staining with iodine.

## II. Survey of Reaction Conditions

**Table S1.** Survey of conditions for model reaction<sup>a</sup>

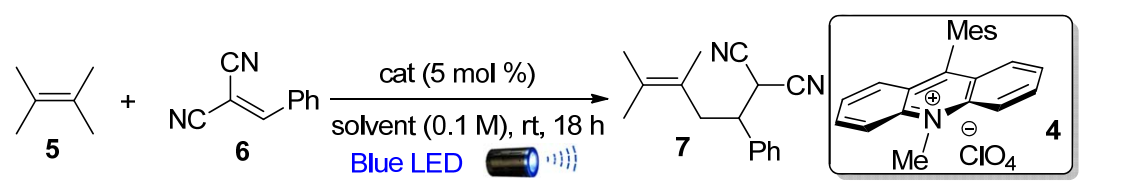

| entry | catalyst                                              | solvent | yield <sup>b</sup> (%) |
|-------|-------------------------------------------------------|---------|------------------------|
| 1     | <b>4</b>                                              | DCE     | 72                     |
| 2     | 2,4,6-tri( <i>p</i> -tolyl)pyrylium tetrafluoroborate | DCE     | 70                     |
| 3     | $\text{Ir}(\text{ppy})_2(\text{dtbpy})_3\text{PF}_6$  | DCE     | na                     |
| 4     | $\text{Ir}(\text{ppy})_3$                             | DCE     | na                     |
| 5     | Eosin Y                                               | DCE     | na                     |
| 6     | $\text{Ru}(\text{bpy})_3\text{Cl}_2$                  | DCE     | trace                  |
| 7     | $\text{Ru}(\text{bpz})_3(\text{PF}_6)_2$              | DCE     | trace                  |
| 8     | <b>4</b>                                              | DCM     | 54                     |
| 9     | <b>4</b>                                              | acetone | 21                     |

|                     |             |      |       |
|---------------------|-------------|------|-------|
| 10                  | <b>4</b>    | MeCN | trace |
| 11                  | <b>4</b>    | DMSO | trace |
| 12                  | <b>4</b>    | DMF  | trace |
| 13 <sup>c</sup>     | <b>4</b>    | DCE  | 84    |
| 14 <sup>c,d</sup>   | <b>4</b>    | DCE  | 91    |
| 15 <sup>c,d,e</sup> | <b>4</b>    | DCE  | 90    |
| 16                  | no catalyst | DCE  | na    |
| 17 <sup>f</sup>     | <b>4</b>    | DCE  | na    |

<sup>a</sup> Unless otherwise noted, reaction of **5** (95  $\mu$ L, 0.8 mmol), **6** (31 mg, 0.2 mmol), and catalyst (0.01 mmol) were carried out in 2.0 mL of the solvent. <sup>b</sup> Isolated yields. <sup>c</sup> 4.0 mL DCE was used. <sup>d</sup> The catalyst loading was changed to 2.5 mol %. <sup>e</sup> The reaction was conducted using a “stop-flow micro tubing” reactor for 5 hrs. <sup>f</sup> The reaction was conducted in dark.

### III. Typical Procedure for Alkylation of Allylic sp<sup>3</sup> C–H Bonds in Batch

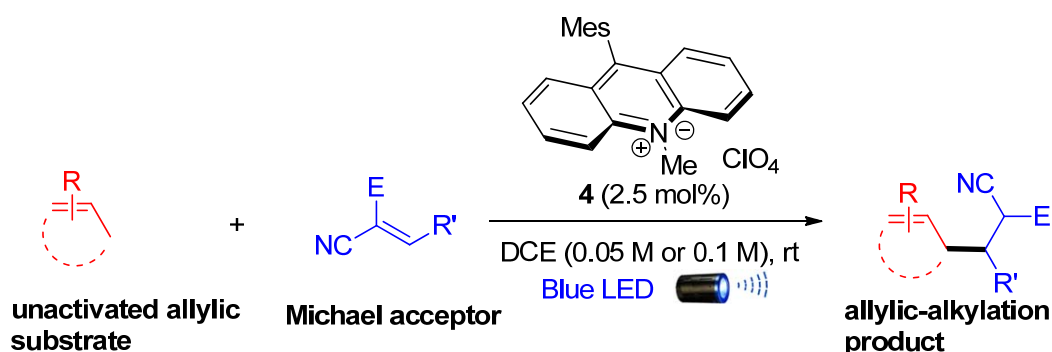

To a 25 mL Schlenk tube equipped with a magnetic stir bar was added the corresponding Michael acceptor (0.2 mmol, 1.0 equiv.), and 9-mesityl-10-methylacridinium perchlorate **4** (for **7-31**, and **38-47**, 0.005 mmol, 0.025 equiv.; for **32-37**, 0.01 mmol, 0.05 equiv.). The resulting mixture was sealed and degassed via vacuum evacuation and subsequent backfill with argon for three times. Then anhydrous DCE (for **7-31**, and **38-47**, 4.0 mL; for **32-37**, 2.0 mL) was added, and finally allylic substrate (0.8 mmol, 4.0 equiv.) was added. After that, the reaction was placed under a blue LED (2 meter strips, 20 W) with an argon balloon and irradiated for 18-48 hrs. The solvent was removed on a rotary evaporator under reduced pressure and the residue was subjected to column chromatography isolation on silica gel by gradient elution with hexane / ethyl acetate

(15:1-3:1) to give the alkylation product.

#### IV. Typical Procedure for Alkylation of Allylic $sp^3$ C–H Bonds in “Stop-Flow Micro Tubing” Reactor

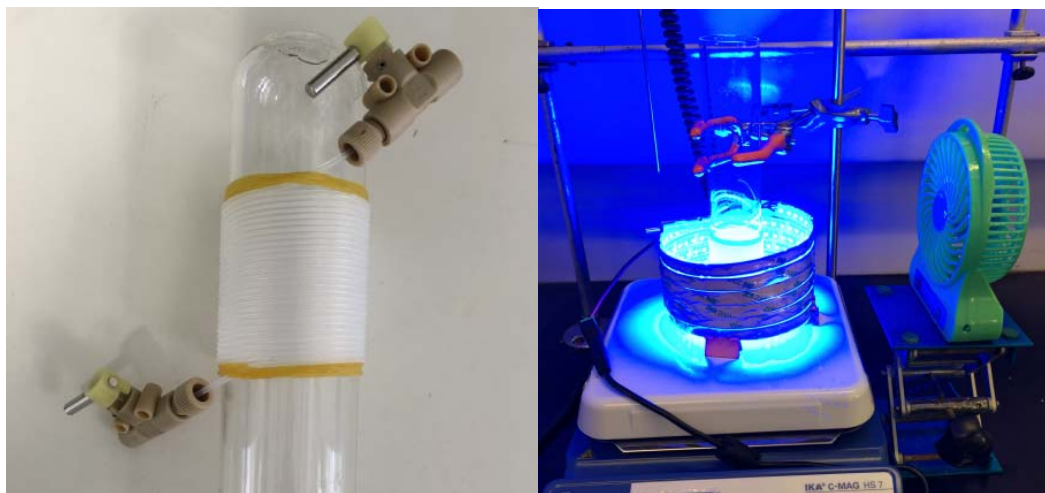

**Figure S1.** “Stop-flow micro tubing” reactor and reaction set up

Under Argon atmosphere, a solution of Michael acceptor (0.2 mmol), 9-mesityl-10-methylacridinium perchlorate **4** (for **32-37**, 0.01 mmol, 0.05 equiv.; for **7**, **43**, **46**, **47** 0.005 mmol, 0.025 equiv.), and allylic substrate (0.8 mmol, 4.0 equiv.) in anhydrous DCE (2.0 mL, for **7**, 4.0 mL) was introduced into a silicon septa vial. Then the solution was pumped into a stop-flow micro tubing (SFMT) reactor (total volume 1.5 mL) which was made of HPFA tubing (O.D. 1/16”, I.D. 0.03”, 340 cm) via a syringe. The valves were closed, and the SFMT was placed under a blue LED and irradiated for 5-48 hrs. The solvent was removed on a rotary evaporator under reduced pressure and the residue was subjected to column chromatography isolation on silica gel by gradient elution with hexane / ethyl acetate (15:1-3:1) to give the alkylation product.

## V. Typical Procedure for Alkylation of Benzylic $sp^3$ C–H Bonds in Batch

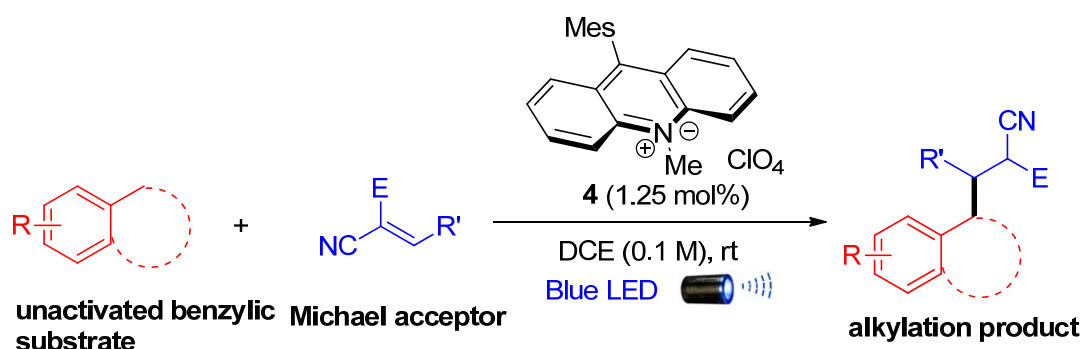

To a 25 mL Schlenk tube equipped with a magnetic stir bar was added the corresponding Michael acceptor (0.2 mmol, 1.0 equiv.), and 9-mesityl-10-methylacridinium perchlorate **4** (0.0025 mmol, 0.0125 equiv.). The resulting mixture was sealed and degassed via vacuum evacuation and subsequent backfill with argon for three times. Then anhydrous DCE (2.0 mL) was added, and finally benzylic substrate (1.0 mmol, 5.0 equiv.) was added. After that, the reaction was placed under a blue LED with an argon balloon and irradiated for 30-48 hrs. The solvent was removed on a rotary evaporator under reduced pressure and the residue was subjected to column chromatography isolation on silica gel by gradient elution with hexane / ethyl acetate (15:1-3:1) to give the alkylation product.

## VI. Typical Procedure for Alkylation of Benzylic $sp^3$ C–H Bonds in “Stop-Flow Micro Tubing” Reactor

Under Argon atmosphere, a solution of Michael acceptor (0.2 mmol), 9-mesityl-10-methylacridinium perchlorate **4** (0.0025 mmol, 0.0125 equiv.), and benzylic substrate (1.0 mmol, 5.0 equiv.) in anhydrous DCE (2.0 mL) was introduced into a silicon septa vial. Then the solution was pumped into a stop-flow micro tubing (SFMT) reactor (total volume 1.5 mL) which was made of HPFA tubing (O.D. 1/16”, I.D. 0.03”, 340 cm) via a syringe. The valves were closed, and the SFMT was placed under a blue LED and irradiated for 30-48 hrs. The solvent was removed on a rotary evaporator under reduced pressure and the residue was subjected to column chromatography isolation on silica gel by gradient elution with hexane / ethyl acetate (15:1-3:1) to give the alkylation product.

## VII. Large-Scale Continuous-Flow Synthesis of Compound 7

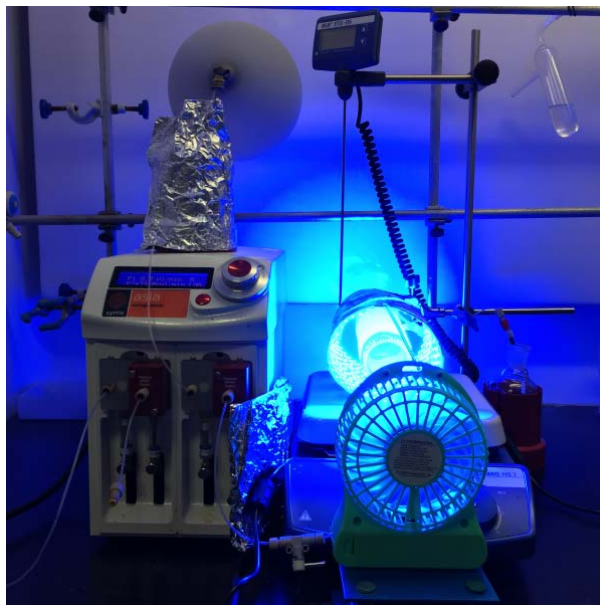

**Figure S2.** Continuous-flow setup for the synthesis of compound 7

Under Argon atmosphere, a solution of 2-benzylidenemalononitrile **6** (1.23 g, 8.0 mmol), 9-mesityl-10-methylacridinium perchlorate **4** (41.1 mg, 0.075 mmol, 0.0125 equiv.), and tetramethylethylene **5** (4.0 mL, 32 mmol, 4.0 equiv.) in anhydrous DCE (80.0 mL) was introduced into a round bottom flask. As shown in Fig. S2, an Asian pump was filled with the mixture and then attached to the flow apparatus. The tubing (HPFA tubing O.D. 1/8", I.D. 0.062", 600 cm) was placed under a blue LED. The flow apparatus itself was set up with  $t_R = 5.0$  hrs, and flow rate = 39  $\mu\text{L}/\text{min}$ . After equilibration with 5 hrs, the solution was collected for 25 hrs. The solvent was removed on a rotary evaporator under reduced pressure and the residue was subjected to column chromatography isolation on silica gel by gradient elution with hexane / ethyl acetate (15:1-10:1) to give the product **7** (1.1 g) in 79% yield.

## VIII. Control Experiments for Mechanistic Investigation

a) Radical inhibition experiments

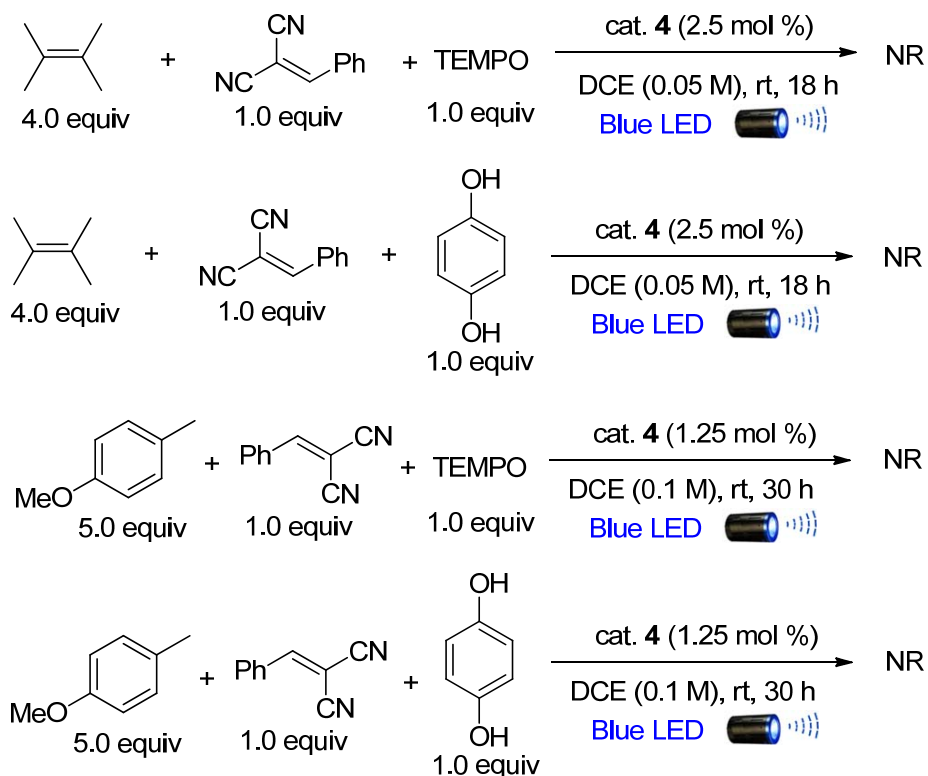

When TEMPO (1.0 equiv.) or hydroquinone (1.0 equiv.) was introduced into the model reaction, no corresponding product was observed according to both TLC and GC-Mass analysis. This result showed that a free radical process was involved.

#### b) Stern-Volmer fluorescence quenching experiments

In a typical experiment, a solution of 9-mesityl-10-methylacridinium perchlorate **4** in DCE ( $1.25 \times 10^{-3}$  M) was added the appropriate amount of quencher in a quartz cuvette. Then the emission of the sample was collected. The emission intensity at 510 nm was collected with excited wavelength of 450 nm.

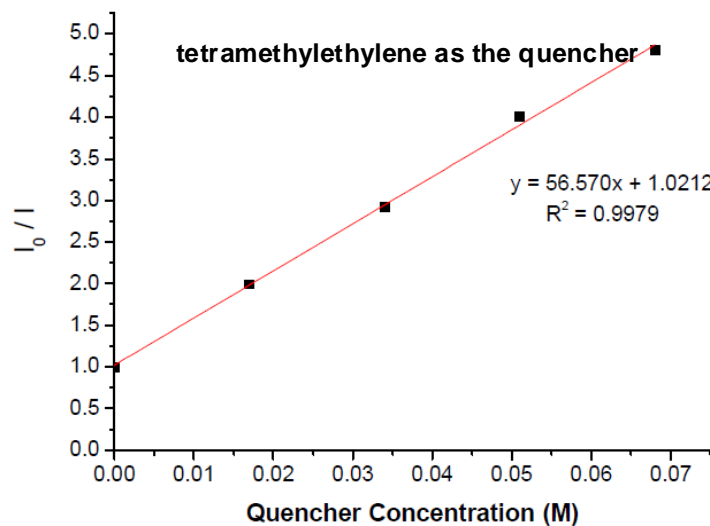

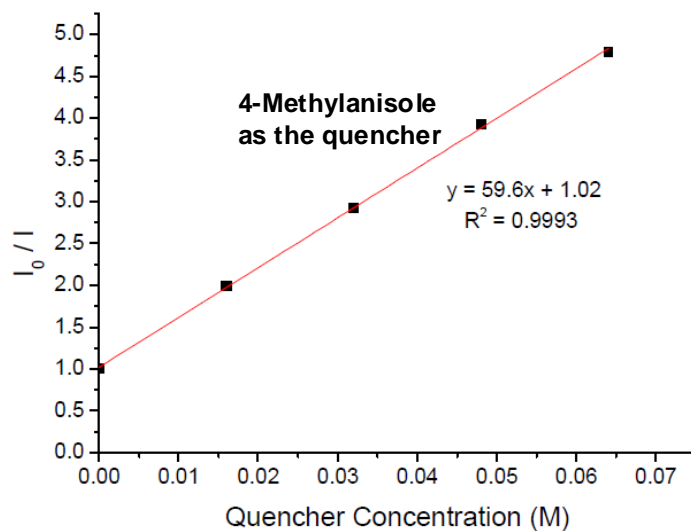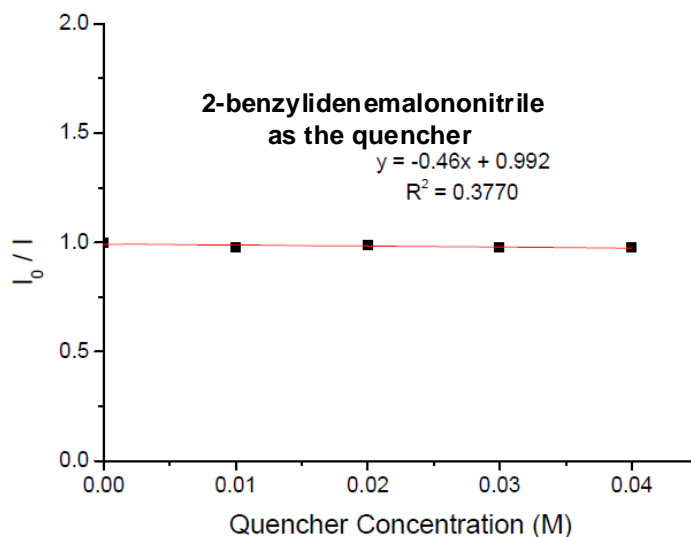

c) Deuterium-labeling experiments

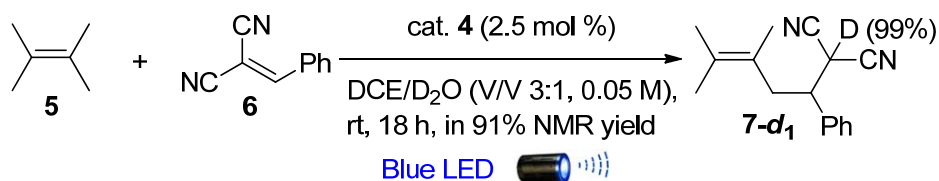

To a 25 mL Schlenk tube equipped with a magnetic stir bar was added 2-benzylidenemalononitrile **6** (31.0 mg, 0.2 mmol), 9-mesityl-10-methylacridinium perchlorate **4** (2.1 mg, 0.005 mmol, 0.025 equiv.). The resulting mixture was sealed and degassed via vacuum evacuation and subsequent backfill with argon for three times. Then anhydrous DCE and D<sub>2</sub>O (V/V = 3/1, 4.0 mL) were added, and finally tetramethylethylene **5** (95.0  $\mu$ L, 0.8 mmol, 4.0 equiv.) was added. After that, the reaction was placed under a blue LED with an argon balloon and irradiated for 18 hrs. The solvent was removed on a rotary evaporator under reduced pressure and



the residue was used for crude  $^1\text{H}$  NMR test with 1,3,5-trimethoxybenzene as the internal standard (Figure S3). It gave the deuterated product **7-d<sub>1</sub>** in 91% NMR yield. Furthermore, when product **7** was subjected to the same reaction conditions, no H/D exchange occurred.

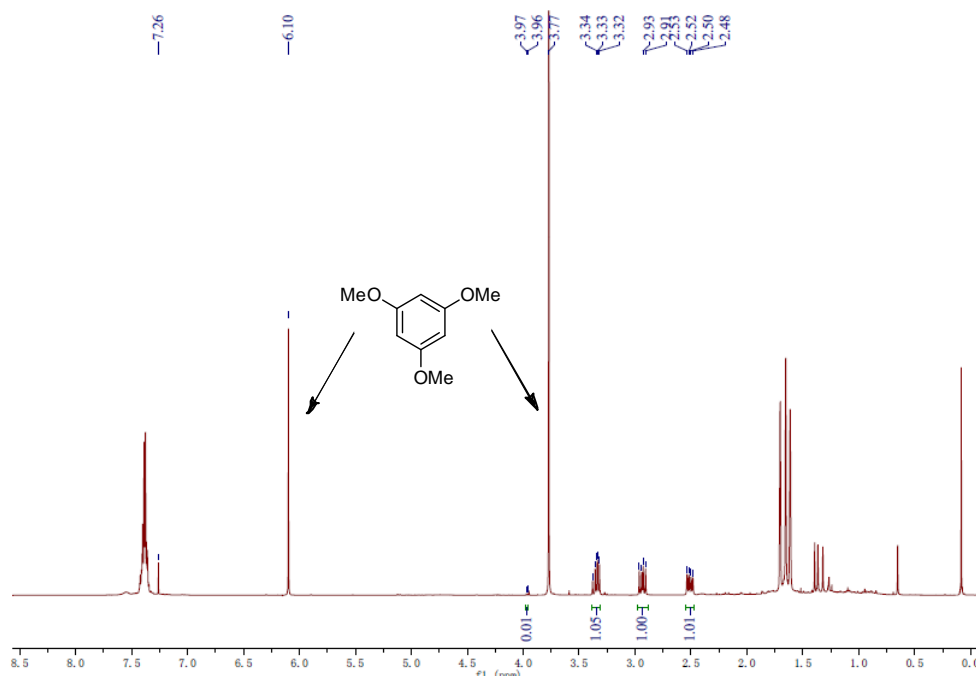

**Figure S3.**  $^1\text{H}$  NMR spectra of the crude mixture of **7-d<sub>1</sub>**

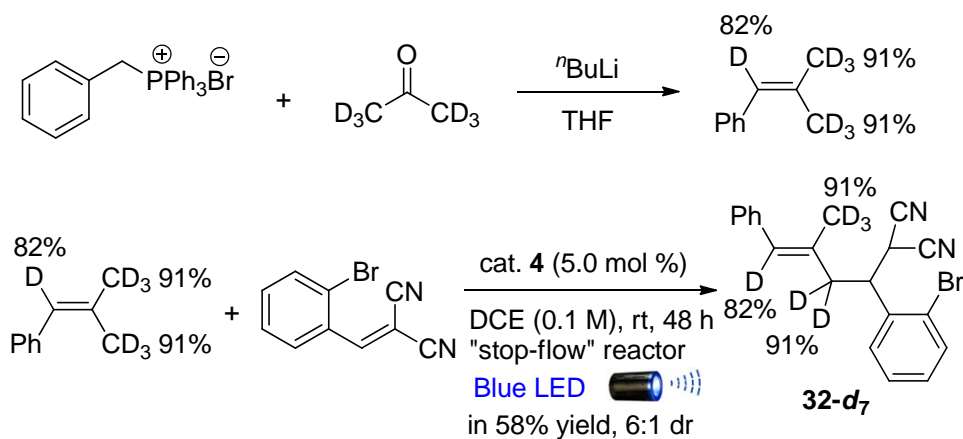

To a THF (50 mL) solution of benzyltriphenylphosphonium bromide (4.32 g, 10 mmol) was added  $n\text{BuLi}$  (2.0 M, 5.1 mL, 10.1 mmol) at 0  $^{\circ}\text{C}$ . The resulting mixture was stirred at 0  $^{\circ}\text{C}$  for 2 hrs until the solution became clear. After acetone- $d_6$  (0.83 mL, 11 mmol) was added, the solution was heated to 50  $^{\circ}\text{C}$  for 24 hrs. Then, the reaction was quenched by aqueous  $\text{NH}_4\text{Cl}$  solution. The mixture was extracted with ethyl acetate, dried over anhydrous  $\text{Na}_2\text{SO}_4$ , and purified using column chromatography isolation on silica gel by gradient elution with hexane / ethyl acetate (15:1-10:1)

to give 2-methyl-1-phenyl-1-propene-*d*<sub>7</sub> (0.9 g) in 65% yield. <sup>1</sup>H NMR (400 MHz, CDCl<sub>3</sub>) δ 7.35 – 7.29 (m, 2H), 7.26 – 7.21 (m, 2H), 7.21 – 7.16 (m, 1H), 6.28 (s, 0.18H), 1.92 – 1.81 (m, 0.53H) (Figure S4).

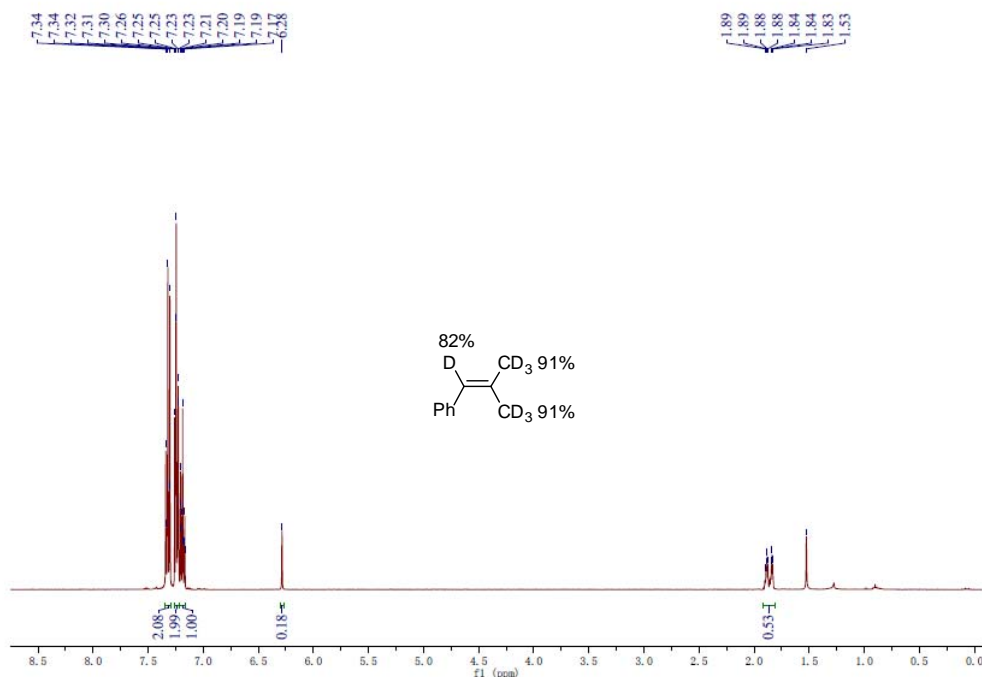

**Figure S4.** <sup>1</sup>H NMR spectra of 2-methyl-1-phenyl-1-propene-*d*<sub>7</sub>

Under Argon atmosphere, a solution of 2-(2-bromobenzylidene)malononitrile (0.2 mmol), 9-mesityl-10-methylacridinium perchlorate **4** (0.01 mmol, 0.05 equiv.), and 2-methyl-1-phenyl-1-propene-*d*<sub>7</sub> (111 mg, 0.8 mmol, 4.0 equiv.) in anhydrous DCE (2.0 mL) was introduced into a silicon septa vial. Then the solution was pumped into a stop-flow micro tubing (SFMT) reactor (total volume 1.5 mL) which was made of HPFA tubing (O.D. 1/16", I.D. 0.03", 340 cm) via a syringe. The valves were closed, and the SFMT was placed under a blue LED and irradiated for 48 hrs. The solvent was removed on a rotary evaporator under reduced pressure and the residue was subjected to column chromatography isolation on silica gel by gradient elution with hexane / ethyl acetate (15:1-10:1) to give the alkylation product **32-d**<sub>7</sub> (32 mg) in 58% yield and 6:1 rr with the *E*-isomer being the major. <sup>1</sup>H NMR (400 MHz, CDCl<sub>3</sub>) δ 7.66 (dd, *J* = 8.0, 1.2 Hz, 1H), 7.53 (dd, *J* = 7.9, 1.5 Hz, 1H), 7.41 (td, *J* = 7.7, 1.2 Hz, 1H), 7.33 – 7.28 (m, 2H), 7.25 – 7.18 (m, 2H), 7.18 – 7.11 (m, 2H), 6.41 (s, 0.18H), 4.23 (d, *J* = 4.8 Hz, 1H), 4.09 (d, *J* = 4.8 Hz, 1H), 2.95 (d, *J* = 7.2 Hz, 0.09H), 2.82 (d, *J* = 8.3 Hz, 0.09H), 1.90 – 1.82 (m, 0.27H) (Figure S5).

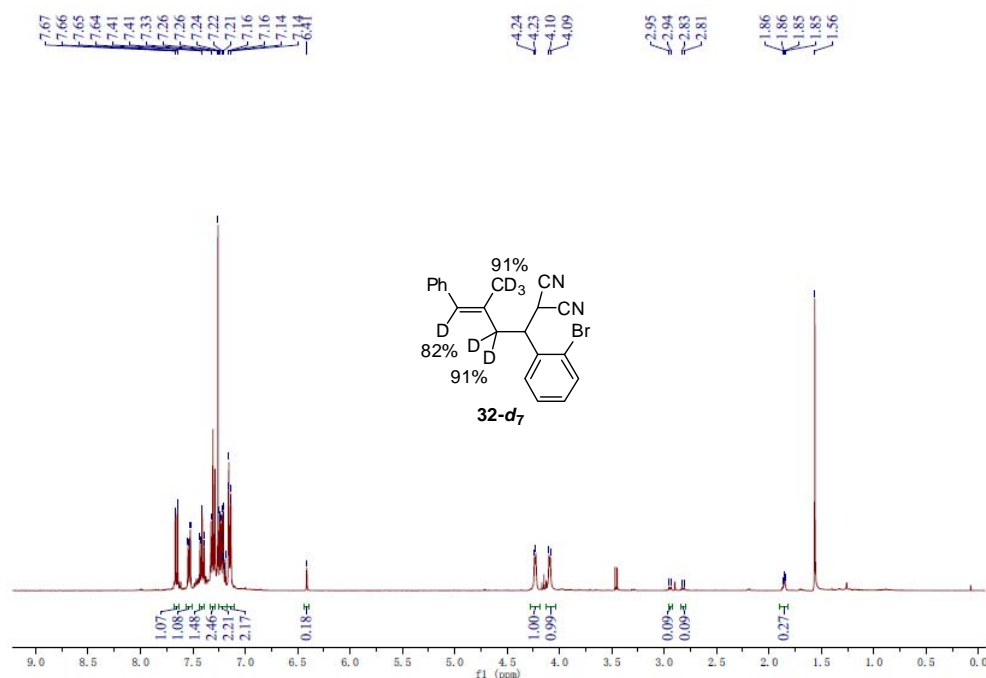

**Figure S5.**  $^1\text{H}$  NMR spectra of product **32-d<sub>7</sub>**

The above deuterium-labeling results strongly imply that the anion intermediate **V** would most likely abstract proton from solvent instead of substrate **1**.

d) Kinetic isotope effect experiments

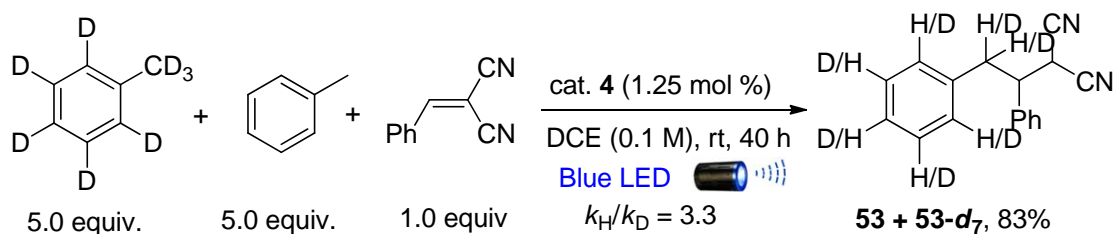

Under Argon atmosphere, a solution of 2-benzylidenemalononitrile **6** (31.0 mg, 0.2 mmol), 9-mesityl-10-methylacridinium perchlorate **4** (1.0 mg, 0.0025 mmol, 0.0125 equiv.), toluene (106  $\mu\text{L}$ , 1.0 mmol, 5.0 equiv.), and toluene- $d_8$  (106  $\mu\text{L}$ , 1.0 mmol, 5.0 equiv.) in anhydrous DCE (2.0 mL) was introduced into a silicon septa vial. Then the solution was pumped into a stop-flow micro tubing (SFMT) reactor (total volume 1.5 mL) which was made of HPFA tubing (O.D. 1/16", I.D. 0.03", 340 cm) via a syringe. The valves were closed, and the SFMT was placed under a blue LED and irradiated for 40 hrs. The solvent was removed on a rotary evaporator under reduced pressure and the residue was subjected to column chromatography isolation on silica gel by gradient elution with hexane / ethyl acetate (15:1-10:1) to give the desired product **53** and **53-d<sub>7</sub>** (30.6 mg) in 83% yield. The  $^1\text{H}$  NMR of the product showed that the position of the benzyl was 1.54 H, thus the

value of the isotopic effects was  $k_H/k_D = 3.3$  (Figure S6).

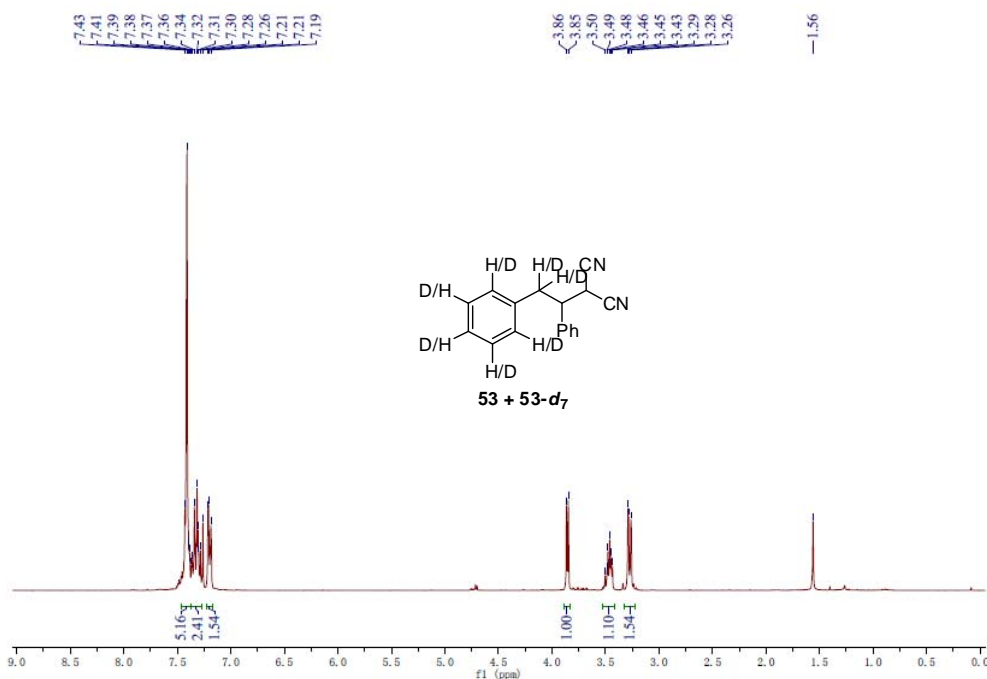

Figure S6. <sup>1</sup>H NMR spectra of product **53** + **53-d<sub>7</sub>**

## IX. Proposed Mechanism Involving Hydrogen Atom Transfer (HAT) Process and the DFT Calculation Results

A mechanism involving hydrogen atom transfer process was also proposed to rationalize the alkylation of allylic/benzylic  $sp^3$  C–H bonds. As shown in Scheme S1, the radical cation **VI** generated via photoredox mediated SET process can accomplish an intermolecular H-atom abstraction from another molecule of **5**, in which case the radical cation itself served as an HAT catalyst. However, the quantum chemistry calculation using a composite method, CBS-QB3, did not support this process, as the proposed new generated C–H bond in HAT product **VII** is much weaker than the allylic C–H bond in **7** (72.4 kcal / mol vs 83.9 kcal / mol) (Scheme S2).

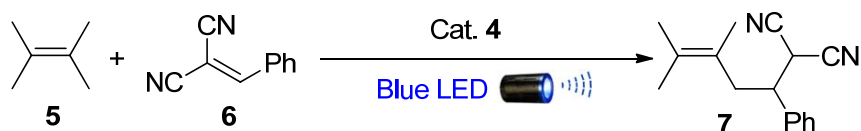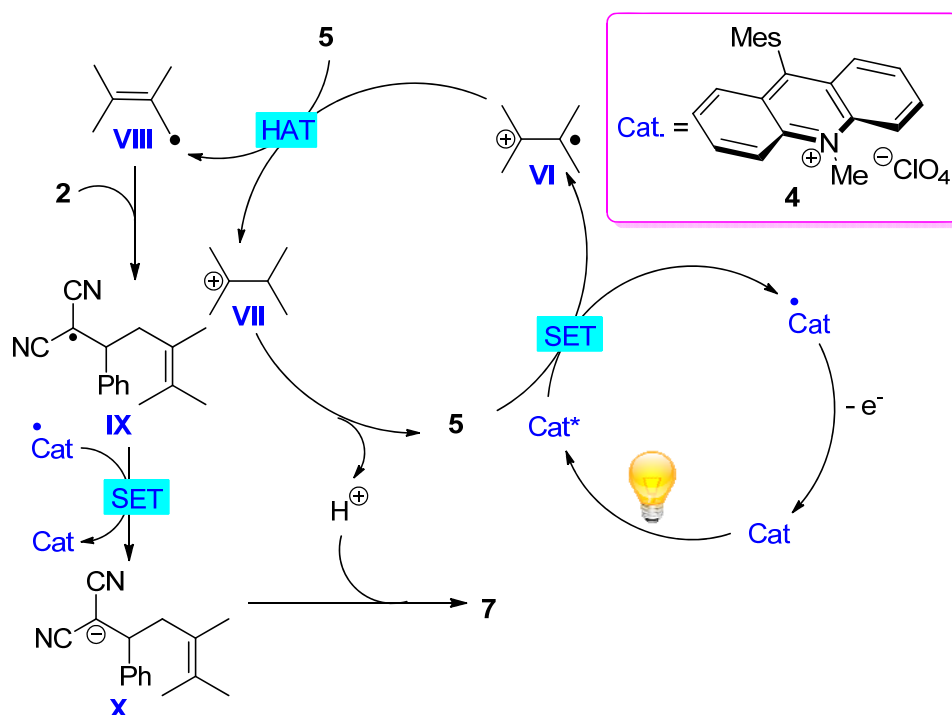

**Scheme S1.** Proposed hydrogen atom transfer mechanism

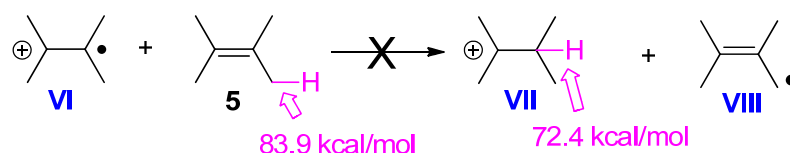

**Scheme S2.** Calculated C-H bond dissociation energy

### Computational details (Methodology):

The quantum chemistry calculations are performed using the Gaussian 09 program<sup>1</sup>. A composite method, CBS-QB3<sup>2,3</sup> is used to carry out the calculations of geometry, frequency and energy within the Polarizable Continuum Model (PCM)<sup>4</sup>. The CBS-QB3 method calculates geometries and frequencies at the B3LYP/CBSB7 level of theory, and the energy is obtained by energy calculations at the CCSD(T)/6-31+G(d') and MP4SDQ/CBSB4 levels of theories and extrapolations to the complete basis set limit. All molecular structures have no imaginary frequencies and are local minima on the potential energy surfaces. Expression (a), formulated by Blanksby and Ellison<sup>5</sup> is used to calculate the bond dissociation energy (BDE) for a dissociation

process  $X-Y \rightarrow X^{\bullet} + Y^{\bullet}$

$$D_0(X-Y) = E_0(X) + E_0(Y) - E_0(X-Y) \quad (\text{a})$$

where  $D_0(X-Y)$ ,  $E_0(X)$ ,  $E_0(Y)$  and  $E_0(X-Y)$  denote the BDE to be calculated, computed electronic energies at 0 K with zero-point energy (ZPE) corrections for X, Y and X-Y, respectively.

**Table S2. Optimized geometries (Angstrom) and Energies (Hartree) for species involved in the BDE calculations (CBS-QB3, SCRF = (solvent = CH<sub>2</sub>ClCH<sub>2</sub>Cl, PCM))**

| <b>VII <math>\longrightarrow</math> VI + H<math>\cdot</math></b>                                 |                                                              |           |           |
|--------------------------------------------------------------------------------------------------|--------------------------------------------------------------|-----------|-----------|
| <b>VII</b><br>  | CBS-QB3 (0 K)= -235.712831                                   |           |           |
|                                                                                                  | SCFR = (solvent = CH <sub>2</sub> ClCH <sub>2</sub> Cl, PCM) |           |           |
|                                                                                                  | 1.704025                                                     | 0.852496  | -0.521040 |
|                                                                                                  | 2.669610                                                     | 0.417421  | -0.782943 |
|                                                                                                  | 1.427986                                                     | 1.558771  | -1.306607 |
|                                                                                                  | 1.830595                                                     | 1.401667  | 0.413553  |
|                                                                                                  | -1.802205                                                    | -0.773065 | -0.495752 |
|                                                                                                  | -2.329353                                                    | -0.213315 | -1.288757 |
|                                                                                                  | -1.476679                                                    | -1.724774 | -0.909396 |
|                                                                                                  | -2.543432                                                    | -0.899651 | 0.297895  |
|                                                                                                  | -0.703970                                                    | 0.101270  | -0.080074 |
|                                                                                                  | -1.010470                                                    | 1.334887  | 0.645735  |
|                                                                                                  | -2.015541                                                    | 1.359130  | 1.059645  |
|                                                                                                  | -0.254860                                                    | 1.569143  | 1.399083  |
|                                                                                                  | -0.920982                                                    | 2.143826  | -0.100785 |
|                                                                                                  | 0.674435                                                     | -0.272784 | -0.404723 |
|                                                                                                  | 0.658985                                                     | -0.881664 | -1.313880 |
|                                                                                                  | 1.048365                                                     | -1.275704 | 0.765314  |
|                                                                                                  | 0.361907                                                     | -2.119165 | 0.826261  |
| 2.043323                                                                                         | -1.650485                                                    | 0.522426  |           |
| 1.087367                                                                                         | -0.763499                                                    | 1.726748  |           |
| <b>VI</b><br> | CBS-QB3 (0 K)= -235.097591                                   |           |           |
|                                                                                                  | SCFR = (solvent = CH <sub>2</sub> ClCH <sub>2</sub> Cl, PCM) |           |           |
|                                                                                                  | -1.478296                                                    | 1.260321  | 0.141107  |
|                                                                                                  | -2.442377                                                    | 1.074099  | 0.616634  |
|                                                                                                  | -0.939826                                                    | 2.044478  | 0.670851  |
|                                                                                                  | -1.701406                                                    | 1.635399  | -0.871120 |
|                                                                                                  | 1.478387                                                     | -1.260352 | 0.141153  |
|                                                                                                  | 2.442179                                                     | -1.074157 | 0.617290  |
|                                                                                                  | 0.939776                                                     | -2.044815 | 0.670283  |
|                                                                                                  | 1.702165                                                     | -1.634947 | -0.871108 |
|                                                                                                  | 0.712553                                                     | -0.000039 | 0.000067  |

|                                                                                                    |                                                                                           |           |           |
|----------------------------------------------------------------------------------------------------|-------------------------------------------------------------------------------------------|-----------|-----------|
|                                                                                                    | 1.478329                                                                                  | 1.260330  | -0.140794 |
|                                                                                                    | 2.442291                                                                                  | 1.074225  | -0.616616 |
|                                                                                                    | 0.939801                                                                                  | 2.044736  | -0.670101 |
|                                                                                                    | 1.701725                                                                                  | 1.634968  | 0.871535  |
|                                                                                                    | -0.712547                                                                                 | -0.000035 | -0.000060 |
|                                                                                                    | -1.478416                                                                                 | -1.260286 | -0.141470 |
|                                                                                                    | -0.939715                                                                                 | -2.044795 | -0.670427 |
|                                                                                                    | -1.702639                                                                                 | -1.634847 | 0.870707  |
|                                                                                                    | -2.442027                                                                                 | -1.073975 | -0.617945 |
| <b>H•</b>                                                                                          | CBS-QB3 (0 K)=-0.499834<br>SCFR = (solvent = CH <sub>2</sub> ClCH <sub>2</sub> Cl, PCM)   |           |           |
|                                                                                                    | 0.000000                                                                                  | 0.000000  | 0.000000  |
| <b>5 → VIII + H•</b>                                                                               |                                                                                           |           |           |
| <b>5</b><br>      | CBS-QB3 (0 K)=-235.333327<br>SCFR = (solvent = CH <sub>2</sub> ClCH <sub>2</sub> Cl, PCM) |           |           |
|                                                                                                    | -1.526181                                                                                 | 1.249877  | 0.005092  |
|                                                                                                    | -2.209886                                                                                 | 1.237299  | 0.862438  |
|                                                                                                    | -0.960890                                                                                 | 2.178362  | 0.047457  |
|                                                                                                    | -2.158988                                                                                 | 1.283666  | -0.890182 |
|                                                                                                    | 1.526271                                                                                  | -1.249868 | 0.005093  |
|                                                                                                    | 2.210095                                                                                  | -1.237157 | 0.862341  |
|                                                                                                    | 0.961072                                                                                  | -2.178397 | 0.047624  |
|                                                                                                    | 2.158961                                                                                  | -1.283693 | -0.890265 |
|                                                                                                    | 0.673189                                                                                  | -0.000022 | 0.000002  |
|                                                                                                    | 1.526181                                                                                  | 1.249877  | -0.005093 |
|                                                                                                    | 2.209942                                                                                  | 1.237258  | -0.862393 |
|                                                                                                    | 0.960893                                                                                  | 2.178361  | -0.047539 |
|                                                                                                    | 2.158929                                                                                  | 1.283709  | 0.890222  |
|                                                                                                    | -0.673190                                                                                 | -0.000022 | -0.000001 |
|                                                                                                    | -1.526271                                                                                 | -1.249868 | -0.005092 |
|                                                                                                    | -0.961068                                                                                 | -2.178399 | -0.047526 |
|                                                                                                    | -2.159034                                                                                 | -1.283643 | 0.890214  |
|                                                                                                    | -2.210024                                                                                 | -1.237206 | -0.862397 |
| <b>VIII</b><br> | CBS-QB3 (0 K)=-234.699798<br>SCFR = (solvent = CH <sub>2</sub> ClCH <sub>2</sub> Cl, PCM) |           |           |
|                                                                                                    | -0.651651                                                                                 | -0.054669 | -0.000044 |
|                                                                                                    | 0.742439                                                                                  | 0.163211  | -0.000019 |
|                                                                                                    | -1.266686                                                                                 | -1.423667 | 0.000044  |
|                                                                                                    | -1.915719                                                                                 | -1.557411 | 0.876107  |
|                                                                                                    | -1.915514                                                                                 | -1.557619 | -0.876138 |
|                                                                                                    | -0.535781                                                                                 | -2.230902 | 0.000229  |
|                                                                                                    | -1.618769                                                                                 | 1.101091  | -0.000034 |
|                                                                                                    | -2.651795                                                                                 | 0.747945  | -0.000873 |

|  |           |           |           |
|--|-----------|-----------|-----------|
|  | -1.488798 | 1.742883  | 0.879497  |
|  | -1.487676 | 1.743877  | -0.878655 |
|  | 1.696873  | -1.020481 | -0.000028 |
|  | 2.732634  | -0.677627 | -0.000064 |
|  | 1.555995  | -1.654515 | 0.880276  |
|  | 1.555939  | -1.654540 | -0.880306 |
|  | 1.284749  | 1.433464  | 0.000044  |
|  | 0.670794  | 2.324763  | 0.000082  |
|  | 2.358184  | 1.579454  | 0.000062  |

## X. Analytical Data of the Products

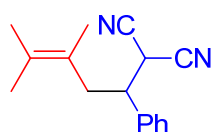

### 2-(3,4-Dimethyl-1-phenylpent-3-en-1-yl)malononitrile (7)

Following the typical procedure **III**, tetramethylethylene **5** (95  $\mu$ L, 0.8 mmol, 4.0 equiv), 2-benzylidenemalononitrile **6** (31 mg, 0.2 mmol, 1.0 equiv), and 9-mesityl-10-methylacridinium perchlorate **4** (2.1 mg, 0.005 mmol, 0.025 equiv) in DCE (4.0 mL) were employed to give the product **7** (43 mg) in 91% yield as a colorless oil.  $^1\text{H}$  NMR (300 MHz,  $\text{CDCl}_3$ )  $\delta$  7.54 – 7.33 (m, 5H), 4.00 (d,  $J$  = 5.1 Hz, 1H), 3.38 (ddd,  $J$  = 8.7, 6.7, 5.2 Hz, 1H), 2.98 (dd,  $J$  = 13.9, 8.7 Hz, 1H), 2.55 (dd,  $J$  = 13.9, 6.7 Hz, 1H), 1.75 (s, 3H), 1.70 (s, 3H), 1.66 (s, 3H);  $^{13}\text{C}$  NMR (75 MHz,  $\text{CDCl}_3$ )  $\delta$  137.1, 130.1, 128.9, 128.8, 127.9, 122.6, 112.4, 111.9, 45.4, 37.3, 28.5, 20.9, 20.6, 18.3; HRMS–ESI  $[M - H]^-$  Calcd for  $\text{C}_{16}\text{H}_{17}\text{N}_2$  237.1397, found 237.1395.

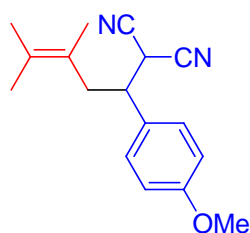

### 2-(1-(4-Methoxyphenyl)-3,4-dimethylpent-3-en-1-yl)malononitrile (8)

Following the typical procedure **III**, tetramethylethylene **5** (95  $\mu$ L, 0.8 mmol, 4.0 equiv), 2-(4-methoxybenzylidene)malononitrile (37 mg, 0.2 mmol, 1.0 equiv), and 9-mesityl-10-methylacridinium perchlorate **4** (2.1 mg, 0.005 mmol, 0.025 equiv) in DCE (4.0 mL) were employed to give the product **8** (28.4 mg) in 53% yield as a colorless oil.  $^1\text{H}$  NMR (400 MHz,  $\text{CDCl}_3$ )  $\delta$  7.33 – 7.27 (m, 2H), 6.95 – 6.89 (m, 2H), 3.91 (d,  $J$  = 5.0 Hz, 1H), 3.82 (s, 3H), 3.30 (ddd,  $J$  = 8.8, 6.6, 5.0 Hz, 1H), 2.91 (dd,  $J$  = 14.0, 8.8 Hz, 1H), 2.47 (dd,  $J$  = 14.0, 6.7 Hz,



1H), 1.71 (s, 3H), 1.66 (s, 3H), 1.61 (s, 3H); <sup>13</sup>C NMR (101 MHz, CDCl<sub>3</sub>) δ 159.8, 129.9, 129.1, 122.7, 114.3, 112.6, 112.0, 55.3, 44.8, 37.3, 28.8, 20.9, 20.7, 18.3; HRMS–ESI [M – H]<sup>–</sup> Calcd for C<sub>17</sub>H<sub>19</sub>N<sub>2</sub>O 267.1503, found 267.1503.

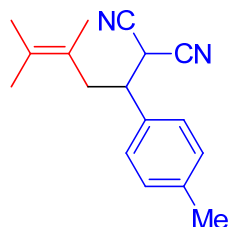

### 2-(3,4-Dimethyl-1-(p-tolyl)pent-3-en-1-yl)malononitrile (9)

Following the typical procedure **III**, tetramethylethylene **5** (95 μL, 0.8 mmol, 4.0 equiv), 2-(4-methylbenzylidene)malononitrile (34 mg, 0.2 mmol, 1.0 equiv), and 9-mesityl-10-methylacridinium perchlorate **4** (2.1 mg, 0.005 mmol, 0.025 equiv) in DCE (4.0 mL) were employed to give the product **9** (40.2 mg) in 80% yield as a colorless oil. <sup>1</sup>H NMR (300 MHz, CDCl<sub>3</sub>) δ 7.37 – 7.20 (m, 4H), 3.97 (d, *J* = 5.0 Hz, 1H), 3.35 (ddd, *J* = 8.8, 6.5, 5.2 Hz, 1H), 2.97 (dd, *J* = 14.0, 8.8 Hz, 1H), 2.52 (dd, *J* = 14.1, 6.8 Hz, 1H), 2.41 (s, 3H), 1.76 (s, 3H), 1.70 (s, 3H), 1.66 (s, 3H); <sup>13</sup>C NMR (75 MHz, CDCl<sub>3</sub>) δ 138.6, 134.1, 129.9, 129.6, 127.8, 122.7, 112.5, 111.9, 45.1, 37.2, 28.6, 21.1, 20.9, 20.6, 18.3; HRMS–ESI [M – H]<sup>–</sup> Calcd for C<sub>17</sub>H<sub>19</sub>N<sub>2</sub> 251.1554, found 251.1549.

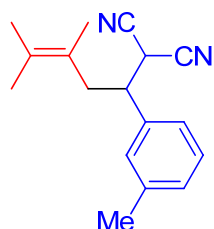

### 2-(3,4-Dimethyl-1-(m-tolyl)pent-3-en-1-yl)malononitrile (10)

Following the typical procedure **III**, tetramethylethylene **5** (95 μL, 0.8 mmol, 4.0 equiv), 2-(3-methylbenzylidene)malononitrile (34 mg, 0.2 mmol, 1.0 equiv), and 9-mesityl-10-methylacridinium perchlorate **4** (2.1 mg, 0.005 mmol, 0.025 equiv) in DCE (4.0 mL) were employed to give the product **10** (32 mg) in 63% yield as a colorless oil. <sup>1</sup>H NMR (300 MHz, CDCl<sub>3</sub>) δ 7.34 – 7.24 (m, 1H), 7.24 – 7.09 (m, 3H), 3.94 (d, *J* = 5.1 Hz, 1H), 3.41 – 3.21 (m, 1H), 2.93 (dd, *J* = 14.0, 8.8 Hz, 1H), 2.48 (dd, *J* = 13.9, 6.5 Hz, 1H), 2.38 (s, 3H), 1.71 (s, 3H), 1.66 (s, 3H), 1.62 (s, 3H); <sup>13</sup>C NMR (75 MHz, CDCl<sub>3</sub>) δ 138.7, 137.1, 130.0, 129.5, 128.8, 128.6, 124.9, 122.7, 112.5, 111.9, 45.3, 37.3, 28.5, 21.4, 20.9, 20.7, 18.3; HRMS–ESI [M – H]<sup>–</sup> Calcd for

C<sub>17</sub>H<sub>19</sub>N<sub>2</sub> 251.1554, found 251.1544.

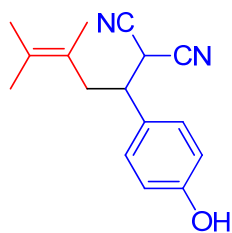

**2-(1-(4-Hydroxyphenyl)-3,4-dimethylpent-3-en-1-yl)malononitrile (11)**

Following the typical procedure **III**, tetramethylethylene **5** (95  $\mu$ L, 0.8 mmol, 4.0 equiv), 2-(4-hydroxybenzylidene)malononitrile (34 mg, 0.2 mmol, 1.0 equiv), and 9-mesityl-10-methylacridinium perchlorate **4** (2.1 mg, 0.005 mmol, 0.025 equiv) in DCE (4.0 mL) were employed to give the product **11** (27.4 mg) in 54% yield as a colorless oil. <sup>1</sup>H NMR (300 MHz, CDCl<sub>3</sub>)  $\delta$  7.28 (d,  $J$  = 8.5 Hz, 2H), 6.88 (d,  $J$  = 8.3 Hz, 2H), 5.40 (s, 1H), 3.97 (d,  $J$  = 4.9 Hz, 1H), 3.42 – 3.24 (m, 1H), 2.94 (dd,  $J$  = 14.0, 8.9 Hz, 1H), 2.50 (dd,  $J$  = 14.0, 6.5 Hz, 1H), 1.75 (s, 3H), 1.70 (s, 3H), 1.65 (s, 3H); <sup>13</sup>C NMR (75 MHz, CDCl<sub>3</sub>)  $\delta$  156.1, 130.0, 129.3, 122.7, 115.9, 112.6, 111.9, 104.9, 44.8, 37.3, 28.8, 20.9, 20.7, 18.3; HRMS–ESI [M – H]<sup>–</sup> Calcd for C<sub>16</sub>H<sub>17</sub>N<sub>2</sub>O 253.1346, found 253.1348.

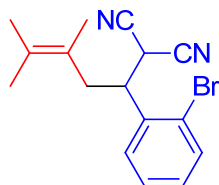

**2-(1-(2-Bromophenyl)-3,4-dimethylpent-3-en-1-yl)malononitrile (12)**

Following the typical procedure **III**, tetramethylethylene **5** (95  $\mu$ L, 0.8 mmol, 4.0 equiv), 2-(2-bromobenzylidene)malononitrile (47 mg, 0.2 mmol, 1.0 equiv), and 9-mesityl-10-methylacridinium perchlorate **4** (2.1 mg, 0.005 mmol, 0.025 equiv) in DCE (4.0 mL) were employed to give the product **12** (58.4 mg) in 92% yield as a colorless oil. <sup>1</sup>H NMR (300 MHz, CDCl<sub>3</sub>)  $\delta$  7.67 (d,  $J$  = 8.0 Hz, 1H), 7.54 (d,  $J$  = 7.6 Hz, 1H), 7.42 (t,  $J$  = 7.6 Hz, 1H), 7.34 – 7.20 (m, 1H), 4.18 (dd,  $J$  = 13.0, 7.4 Hz, 1H), 4.06 (d,  $J$  = 5.2 Hz, 1H), 2.91 (dd,  $J$  = 14.0, 7.4 Hz, 1H), 2.68 (dd,  $J$  = 14.0, 7.8 Hz, 1H), 1.77 (s, 3H), 1.67 (s, 6H); <sup>13</sup>C NMR (75 MHz, CDCl<sub>3</sub>)  $\delta$  136.5, 133.6, 130.1, 130.0, 128.4, 128.1, 125.1, 122.1, 111.9, 111.7, 43.1, 36.6, 27.7, 20.9, 20.7, 18.3; HRMS–ESI [M – H]<sup>–</sup> Calcd for C<sub>16</sub>H<sub>16</sub>BrN<sub>2</sub> 315.0502, found 315.0499.

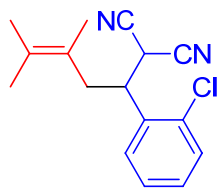

**2-(1-(2-Chlorophenyl)-3,4-dimethylpent-3-en-1-yl)malononitrile (13)**

Following the typical procedure **III**, tetramethylethylene **5** (95  $\mu$ L, 0.8 mmol, 4.0 equiv), 2-(2-chlorobenzylidene)malononitrile (38 mg, 0.2 mmol, 1.0 equiv), and 9-mesityl-10-methylacridinium perchlorate **4** (2.1 mg, 0.005 mmol, 0.025 equiv) in DCE (4.0 mL) were employed to give the product **13** (47 mg) in 86% yield as a colorless oil.  $^1\text{H}$  NMR (300 MHz,  $\text{CDCl}_3$ )  $\delta$  7.46 – 7.34 (m, 3H), 7.34 – 7.24 (m, 1H), 4.00 (d,  $J$  = 5.2 Hz, 1H), 3.43 – 3.25 (m, 1H), 2.94 (dd,  $J$  = 14.0, 8.7 Hz, 1H), 2.53 (dd,  $J$  = 13.9, 6.8 Hz, 1H), 1.74 (s, 3H), 1.70 (s, 3H), 1.66 (s, 3H);  $^{13}\text{C}$  NMR (75 MHz,  $\text{CDCl}_3$ )  $\delta$  139.1, 134.9, 130.5, 130.3, 129.1, 128.2, 126.1, 122.1, 112.1, 111.6, 45.0, 37.2, 28.3, 20.9, 20.7, 18.3; HRMS–ESI [ $\text{M} - \text{H}$ ] $^-$  Calcd for  $\text{C}_{16}\text{H}_{16}\text{ClN}_2$  271.1007, found 271.0998.

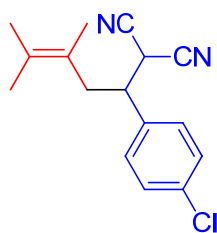

**2-(1-(4-Chlorophenyl)-3,4-dimethylpent-3-en-1-yl)malononitrile (14)**

Following the typical procedure **III**, tetramethylethylene **5** (95  $\mu$ L, 0.8 mmol, 4.0 equiv), 2-(4-chlorobenzylidene)malononitrile (38 mg, 0.2 mmol, 1.0 equiv), and 9-mesityl-10-methylacridinium perchlorate **4** (2.1 mg, 0.005 mmol, 0.025 equiv) in DCE (4.0 mL) were employed to give the product **14** (50.5 mg) in 93% yield as a colorless oil.  $^1\text{H}$  NMR (300 MHz,  $\text{CDCl}_3$ )  $\delta$  7.48 – 7.27 (m, 4H), 3.95 (d,  $J$  = 5.0 Hz, 1H), 3.33 (ddd,  $J$  = 8.7, 6.7, 5.1 Hz, 1H), 2.90 (dd,  $J$  = 14.0, 8.7 Hz, 1H), 2.48 (dd,  $J$  = 14.0, 6.7 Hz, 1H), 1.70 (s, 3H), 1.65 (s, 3H), 1.61 (s, 3H);  $^{13}\text{C}$  NMR (75 MHz,  $\text{CDCl}_3$ )  $\delta$  135.5, 134.8, 130.4, 129.3, 129.2, 122.2, 112.2, 111.7, 44.8, 37.1, 28.4, 20.9, 20.7, 18.3; HRMS–ESI [ $\text{M} - \text{H}$ ] $^-$  Calcd for  $\text{C}_{16}\text{H}_{16}\text{ClN}_2$  271.1007, found 271.0999.

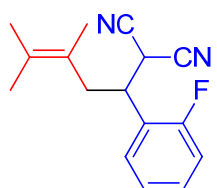

**2-(1-(2-Fluorophenyl)-3,4-dimethylpent-3-en-1-yl)malononitrile (15)**

Following the typical procedure **III**, tetramethylethylene **5** (95  $\mu\text{L}$ , 0.8 mmol, 4.0 equiv), 2-(2-fluorobenzylidene)malononitrile (35 mg, 0.2 mmol, 1.0 equiv), and 9-mesityl-10-methylacridinium perchlorate **4** (2.1 mg, 0.005 mmol, 0.025 equiv) in DCE (4.0 mL) were employed to give the product **15** (50 mg) in 98% yield as a pale yellow oil.  $^1\text{H}$  NMR (300 MHz,  $\text{CDCl}_3$ )  $\delta$  7.47 – 7.32 (m, 2H), 7.27 – 7.06 (m, 2H), 4.11 (d,  $J = 6.9$  Hz, 1H), 3.84 – 3.71 (m, 1H), 2.89 (dd,  $J = 13.8, 7.2$  Hz, 1H), 2.63 (dd,  $J = 13.8, 8.3$  Hz, 1H), 1.67 (s, 3H), 1.65 (s, 3H);  $^{13}\text{C}$  NMR (75 MHz,  $\text{CDCl}_3$ )  $\delta$  160.7 (d,  $J = 246.2$  Hz), 130.4 (d,  $J = 8.7$  Hz), 130.0, 129.2 (d,  $J = 3.7$  Hz), 124.7 (d,  $J = 3.5$  Hz), 124.3 (d,  $J = 13.3$  Hz), 122.3, 115.9 (d,  $J = 22.5$  Hz), 112.1, 111.9, 39.2, 36.8, 27.5 (d,  $J = 2.7$  Hz), 20.8, 20.4, 18.3; HRMS–APCI  $[\text{M} + \text{H}]^+$  Calcd for  $\text{C}_{16}\text{H}_{18}\text{FN}_2$  257.1449, found 257.1451.

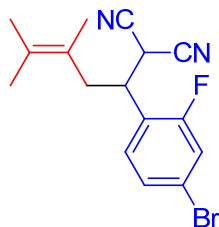**2-(1-(4-Bromo-2-fluorophenyl)-3,4-dimethylpent-3-en-1-yl)malononitrile (16)**

Following the typical procedure **III**, tetramethylethylene **5** (95  $\mu\text{L}$ , 0.8 mmol, 4.0 equiv), 2-(4-bromo-2-fluorobenzylidene)malononitrile (50 mg, 0.2 mmol, 1.0 equiv), and 9-mesityl-10-methylacridinium perchlorate **4** (2.1 mg, 0.005 mmol, 0.025 equiv) in DCE (4.0 mL) were employed to give the product **16** (66 mg) in 99% yield as a colorless oil.  $^1\text{H}$  NMR (600 MHz,  $\text{CDCl}_3$ )  $\delta$  7.30 – 7.17 (m, 3H), 3.96 (d,  $J = 6.6$  Hz, 1H), 3.68 – 3.59 (m, 1H), 2.75 (dd,  $J = 13.8, 7.4$  Hz, 1H), 2.48 (dd,  $J = 13.8, 8.2$  Hz, 1H), 1.57 (s, 3H), 1.55 (s, 3H), 1.53 (s, 3H);  $^{13}\text{C}$  NMR (151 MHz,  $\text{CDCl}_3$ )  $\delta$  160.4 (d,  $J = 251.1$  Hz), 130.4, 130.2 (d,  $J = 4.3$  Hz), 128.1 (d,  $J = 3.6$  Hz), 123.4 (d,  $J = 13.6$  Hz), 123.0 (d,  $J = 10.0$  Hz), 121.9, 119.7 (d,  $J = 25.8$  Hz), 111.8, 111.6, 38.6, 36.5, 27.3 (d,  $J = 2.4$  Hz), 20.9, 20.5, 18.2; HRMS–ESI  $[\text{M} - \text{H}]^-$  Calcd for  $\text{C}_{16}\text{H}_{15}\text{BrFN}_2$  333.0408, found 333.0411.

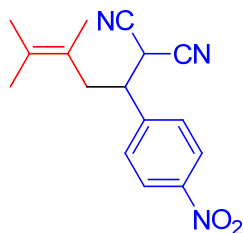

#### 2-(3,4-Dimethyl-1-(4-nitrophenyl)pent-3-en-1-yl)malononitrile (17)

Following the typical procedure **III**, tetramethylethylene **5** (95  $\mu\text{L}$ , 0.8 mmol, 4.0 equiv), 2-(4-nitrobenzylidene)malononitrile (40 mg, 0.2 mmol, 1.0 equiv), and 9-mesityl-10-methylacridinium perchlorate **4** (2.1 mg, 0.005 mmol, 0.025 equiv) in DCE (4.0 mL) were employed to give the product **17** (34.2 mg) in 60% yield as a colorless oil.  $^1\text{H}$  NMR (300 MHz,  $\text{CDCl}_3$ )  $\delta$  8.32 (d,  $J = 8.8$  Hz, 2H), 7.62 (d,  $J = 8.8$  Hz, 2H), 4.08 (d,  $J = 5.1$  Hz, 1H), 3.52 (ddd,  $J = 8.6, 6.8, 5.2$  Hz, 1H), 2.99 (dd,  $J = 14.0, 8.7$  Hz, 1H), 2.59 (dd,  $J = 14.0, 6.8$  Hz, 1H), 1.77 (s, 3H), 1.70 (s, 3H), 1.67 (s, 3H);  $^{13}\text{C}$  NMR (75 MHz,  $\text{CDCl}_3$ )  $\delta$  148.2, 144.1, 131.1, 129.1, 124.1, 121.6, 111.8, 111.3, 45.0, 37.1, 27.9, 20.9, 20.7, 18.2; HRMS–ESI  $[\text{M} - \text{H}]^-$  Calcd for  $\text{C}_{16}\text{H}_{16}\text{N}_3\text{O}_2$  282.1248, found 282.1241.

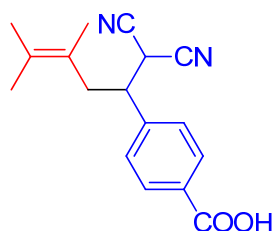

#### 4-(1,1-Dicyano-4,5-dimethylhex-4-en-2-yl)benzoic acid (18)

Following the typical procedure **III**, tetramethylethylene **5** (95  $\mu\text{L}$ , 0.8 mmol, 4.0 equiv), 4-(2,2-dicyanovinyl)benzoic acid (40 mg, 0.2 mmol, 1.0 equiv), and 9-mesityl-10-methylacridinium perchlorate **4** (2.1 mg, 0.005 mmol, 0.025 equiv) in DCE (4.0 mL) were employed to give the product **18** (32.2 mg) in 57% yield as a colorless oil.  $^1\text{H}$  NMR (300 MHz,  $\text{CDCl}_3$ )  $\delta$  8.16 (d,  $J = 8.2$  Hz, 2H), 7.49 (d,  $J = 8.2$  Hz, 2H), 4.01 (d,  $J = 5.2$  Hz, 1H), 3.51 – 3.35 (m, 1H), 2.95 (dd,  $J = 13.9, 8.4$  Hz, 1H), 2.55 (dd,  $J = 13.9, 6.8$  Hz, 1H), 1.69 (s, 3H), 1.65 (s, 3H), 1.62 (s, 3H);  $^{13}\text{C}$  NMR (75 MHz,  $\text{CDCl}_3$ )  $\delta$  170.9, 142.9, 130.9, 130.6, 129.8, 128.2, 122.0, 112.1, 111.6, 45.3, 37.2, 28.2, 20.9, 20.7, 18.3; HRMS–ESI  $[\text{M} - \text{H}]^-$  Calcd for  $\text{C}_{17}\text{H}_{17}\text{N}_2\text{O}_2$  281.1296, found 281.1300.

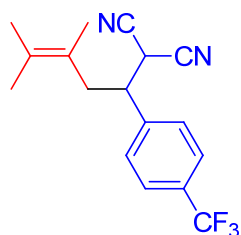

#### 2-(3,4-Dimethyl-1-(4-(trifluoromethyl)phenyl)pent-3-en-1-yl)malononitrile (19)

Following the typical procedure **III**, tetramethylethylene **5** (95  $\mu\text{L}$ , 0.8 mmol, 4.0 equiv), 2-(4-(trifluoromethyl)benzylidene)malononitrile (45 mg, 0.2 mmol, 1.0 equiv), and

9-mesityl-10-methylacridinium perchlorate **4** (2.1 mg, 0.005 mmol, 0.025 equiv) in DCE (4.0 mL) were employed to give the product **19** (57 mg) in 93% yield as a colorless oil.  $^1\text{H}$  NMR (400 MHz,  $\text{CDCl}_3$ )  $\delta$  7.68 (d,  $J = 8.2$  Hz, 2H), 7.51 (d,  $J = 8.2$  Hz, 2H), 3.99 (d,  $J = 5.0$  Hz, 1H), 3.41 (ddd,  $J = 8.9, 6.6, 5.1$  Hz, 1H), 2.95 (dd,  $J = 14.0, 8.9$  Hz, 1H), 2.51 (dd,  $J = 14.0, 6.6$  Hz, 1H), 1.71 (s, 3H), 1.66 (s, 3H), 1.62 (s, 3H);  $^{13}\text{C}$  NMR (101 MHz,  $\text{CDCl}_3$ )  $\delta$  140.9, 131.1 (q,  $J = 32.8$  Hz), 130.8, 128.5, 125.9 (q,  $J = 3.7$  Hz), 123.8 (q,  $J = 272.3$  Hz), 121.9, 112.1, 111.5, 45.1, 37.1, 28.2, 20.9, 20.7, 18.3; HRMS–ESI  $[\text{M} - \text{H}]^-$  Calcd for  $\text{C}_{17}\text{H}_{16}\text{F}_3\text{N}_2$  305.1271, found 305.1266.

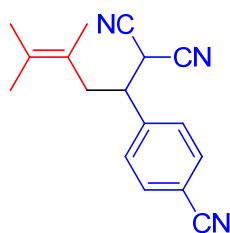

#### 2-(1-(4-Cyanophenyl)-3,4-dimethylpent-3-en-1-yl)malononitrile (**20**)

Following the typical procedure **III**, tetramethylethylene **5** (95  $\mu\text{L}$ , 0.8 mmol, 4.0 equiv), 2-(4-cyanobenzylidene)malononitrile (36 mg, 0.2 mmol, 1.0 equiv), and 9-mesityl-10-methylacridinium perchlorate **4** (2.1 mg, 0.005 mmol, 0.025 equiv) in DCE (4.0 mL) were employed to give the product **20** (48 mg) in 91% yield as a colorless oil.  $^1\text{H}$  NMR (400 MHz,  $\text{CDCl}_3$ )  $\delta$  7.71 (d,  $J = 8.1$  Hz, 2H), 7.50 (d,  $J = 8.1$  Hz, 2H), 4.02 (d,  $J = 5.1$  Hz, 1H), 3.46 – 3.35 (m, 1H), 2.91 (dd,  $J = 14.0, 8.7$  Hz, 1H), 2.51 (dd,  $J = 14.0, 6.8$  Hz, 1H), 1.68 (s, 3H), 1.65 (s, 3H), 1.61 (s, 3H);  $^{13}\text{C}$  NMR (101 MHz,  $\text{CDCl}_3$ )  $\delta$  142.2, 132.7, 130.9, 128.9, 121.7, 118.1, 112.9, 111.9, 111.4, 45.2, 36.9, 27.9, 20.9, 20.6, 18.2; HRMS–ESI  $[\text{M} - \text{H}]^-$  Calcd for  $\text{C}_{17}\text{H}_{16}\text{N}_3$  262.1350, found 262.1341.

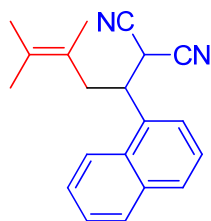

#### 2-(3,4-Dimethyl-1-(naphthalen-1-yl)pent-3-en-1-yl)malononitrile (**21**)

Following the typical procedure **III**, tetramethylethylene **5** (95  $\mu\text{L}$ , 0.8 mmol, 4.0 equiv), 2-(naphthalen-1-ylmethylene)malononitrile (41 mg, 0.2 mmol, 1.0 equiv), and 9-mesityl-10-methylacridinium perchlorate **4** (2.1 mg, 0.005 mmol, 0.025 equiv) in DCE (4.0 mL) were employed to give the product **21** (35.1 mg) in 61% yield as a colorless oil.  $^1\text{H}$  NMR (600

MHz, CDCl<sub>3</sub>)  $\delta$  8.00 (d,  $J$  = 8.5 Hz, 1H), 7.92 (d,  $J$  = 8.1 Hz, 1H), 7.87 (d,  $J$  = 8.2 Hz, 1H), 7.67 (d,  $J$  = 7.2 Hz, 1H), 7.63 – 7.57 (m, 1H), 7.57 – 7.50 (m, 2H), 4.41 (d,  $J$  = 4.3 Hz, 1H), 4.11 (d,  $J$  = 4.8 Hz, 1H), 3.11 (dd,  $J$  = 14.0, 7.7 Hz, 1H), 2.72 (dd,  $J$  = 13.8, 7.2 Hz, 1H), 1.76 (s, 3H), 1.60 (s, 3H), 1.56 (s, 3H); <sup>13</sup>C NMR (151 MHz, CDCl<sub>3</sub>)  $\delta$  134.0, 133.4, 131.2, 129.9, 129.4, 129.2, 126.9, 126.1, 125.3, 124.7, 122.6, 121.5, 112.3, 112.2, 38.4, 37.5, 28.5, 20.9, 20.8, 18.5; HRMS–ESI [ $M - H$ ]<sup>-</sup> Calcd for C<sub>20</sub>H<sub>19</sub>N<sub>2</sub> 287.1554, found 287.1550.

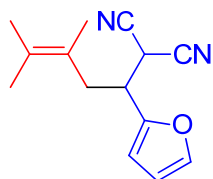

### 2-(1-(Furan-2-yl)-3,4-dimethylpent-3-en-1-yl)malononitrile (**22**)

Following the typical procedure **III**, tetramethylethylene **5** (95  $\mu$ L, 0.8 mmol, 4.0 equiv), 2-(furan-2-ylmethylene)malononitrile (29 mg, 0.2 mmol, 1.0 equiv), and 9-mesityl-10-methylacridinium perchlorate **4** (2.1 mg, 0.005 mmol, 0.025 equiv) in DCE (4.0 mL) were employed to give the product **22** (36 mg) in 80% yield as a colorless oil. <sup>1</sup>H NMR (400 MHz, CDCl<sub>3</sub>)  $\delta$  7.43 (s, 1H), 6.36 (t,  $J$  = 5.1 Hz, 2H), 3.99 (d,  $J$  = 5.3 Hz, 1H), 3.57 – 3.45 (m, 1H), 2.80 (dd,  $J$  = 13.9, 8.0 Hz, 1H), 2.59 (dd,  $J$  = 13.9, 7.5 Hz, 1H), 1.68 (s, 3H), 1.66 (s, 3H), 1.61 (s, 3H); <sup>13</sup>C NMR (101 MHz, CDCl<sub>3</sub>)  $\delta$  150.1, 142.9, 130.5, 121.9, 112.0, 111.5, 110.7, 108.9, 39.5, 35.8, 26.9, 20.9, 20.5, 18.0; HRMS–ESI [ $M - H$ ]<sup>-</sup> Calcd for C<sub>14</sub>H<sub>15</sub>N<sub>2</sub>O 227.1190, found 227.1192.

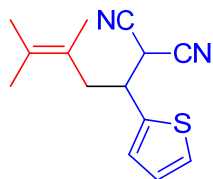

### 2-(3,4-Dimethyl-1-(thiophen-2-yl)pent-3-en-1-yl)malononitrile (**23**)

Following the typical procedure **III**, tetramethylethylene **5** (95  $\mu$ L, 0.8 mmol, 4.0 equiv), 2-(thiophen-2-ylmethylene)malononitrile (32 mg, 0.2 mmol, 1.0 equiv), and 9-mesityl-10-methylacridinium perchlorate **4** (2.1 mg, 0.005 mmol, 0.025 equiv) in DCE (4.0 mL) were employed to give the product **23** (24.4 mg) in 50% yield as a colorless oil. <sup>1</sup>H NMR (300 MHz, CDCl<sub>3</sub>)  $\delta$  7.31 (d,  $J$  = 5.1 Hz, 1H), 7.16 (d,  $J$  = 3.5 Hz, 1H), 7.10 – 7.00 (m, 1H), 3.98 (d,  $J$  = 4.4 Hz, 1H), 3.79 – 3.61 (m, 1H), 2.93 (dd,  $J$  = 14.0, 9.1 Hz, 1H), 2.58 (dd,  $J$  = 14.0, 6.3 Hz, 1H), 1.74 (s, 3H), 1.68 (s, 3H), 1.65 (s, 3H); <sup>13</sup>C NMR (75 MHz, CDCl<sub>3</sub>)  $\delta$  139.5, 130.9, 127.2, 126.5, 125.6, 122.2, 112.3, 111.6, 41.1, 38.7, 29.1, 20.9, 20.7, 18.1; HRMS–ESI [ $M - H$ ]<sup>-</sup> Calcd

for C<sub>14</sub>H<sub>15</sub>N<sub>2</sub>S 243.0961, found 243.0954.

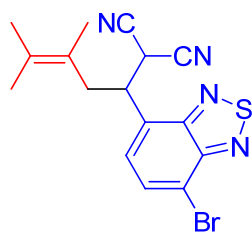

**2-(1-(7-Bromobenzo[c][1,2,5]thiadiazol-4-yl)-3,4-dimethylpent-3-en-1-yl)malononitrile (24)**

Following the typical procedure **III**, tetramethylethylene **5** (95  $\mu$ L, 0.8 mmol, 4.0 equiv), 2-((7-bromobenzo[c][1,2,5]thiadiazol-4-yl)methylene)malononitrile (59 mg, 0.2 mmol, 1.0 equiv), and 9-mesityl-10-methylacridinium perchlorate **4** (2.1 mg, 0.005 mmol, 0.025 equiv) in DCE (4.0 mL) were employed to give the product **24** (69 mg) in 92% yield as a pale yellow oil. <sup>1</sup>H NMR (500 MHz, CDCl<sub>3</sub>)  $\delta$  7.87 (d,  $J$  = 7.4 Hz, 1H), 7.43 (d,  $J$  = 7.5 Hz, 1H), 4.85 (d,  $J$  = 8.3 Hz, 1H), 4.11 – 4.01 (m, 1H), 2.99 – 2.86 (m, 2H), 1.57 (s, 6H), 1.41 (s, 3H); <sup>13</sup>C NMR (126 MHz, CDCl<sub>3</sub>)  $\delta$  153.6, 152.7, 131.9, 130.1, 129.8, 129.4, 122.1, 114.9, 112.1, 111.9, 43.4, 36.7, 27.0, 20.7, 20.3, 18.3; HRMS–ESI [M + H]<sup>+</sup> Calcd for C<sub>16</sub>H<sub>16</sub>BrN<sub>4</sub>S 375.0274, found 375.0266.

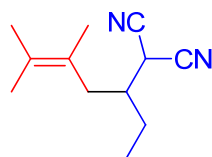

**2-(5,6-Dimethylhept-5-en-3-yl)malononitrile (25)**

Following the typical procedure **III**, tetramethylethylene **5** (95  $\mu$ L, 0.8 mmol, 4.0 equiv), 2-propylidenemalononitrile (22 mg, 0.2 mmol, 1.0 equiv), and 9-mesityl-10-methylacridinium perchlorate **4** (2.1 mg, 0.005 mmol, 0.025 equiv) in DCE (4.0 mL) were employed to give the product **25** (29.5 mg) in 78% yield as a colorless oil. <sup>1</sup>H NMR (400 MHz, CDCl<sub>3</sub>)  $\delta$  3.77 (d,  $J$  = 3.4 Hz, 1H), 2.36 – 2.21 (m, 2H), 2.14 – 2.02 (m, 1H), 1.80 – 1.58 (m, 11H), 1.07 (t,  $J$  = 7.4 Hz, 3H); <sup>13</sup>C NMR (101 MHz, CDCl<sub>3</sub>)  $\delta$  129.9, 122.9, 112.9, 111.9, 41.4, 35.9, 26.0, 24.6, 20.9, 20.7, 18.2, 11.4; HRMS–ESI [M + H]<sup>+</sup> Calcd for C<sub>12</sub>H<sub>19</sub>N<sub>2</sub> 191.1543, found 191.1544.

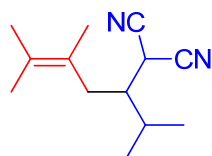

**2-(2,5,6-Trimethylhept-5-en-3-yl)malononitrile (26)**

Following the typical procedure **III**, tetramethylethylene **5** (95  $\mu$ L, 0.8 mmol, 4.0 equiv), 2-(2-methylpropylidene)malononitrile (24 mg, 0.2 mmol, 1.0 equiv), and



9-mesityl-10-methylacridinium perchlorate **4** (2.1 mg, 0.005 mmol, 0.025 equiv) in DCE (4.0 mL) were employed to give the product **26** (18.8 mg) in 46% yield as a colorless oil.  $^1\text{H}$  NMR (400 MHz,  $\text{CDCl}_3$ )  $\delta$  3.80 (d,  $J = 3.1$  Hz, 1H), 2.38 (dd,  $J = 14.3, 10.1$  Hz, 1H), 2.24 (dd,  $J = 11.4, 5.2$  Hz, 1H), 2.06 – 1.96 (m, 2H), 1.74 (s, 3H), 1.71 (s, 3H), 1.63 (s, 3H), 1.15 (d,  $J = 6.6$  Hz, 3H), 1.09 (d,  $J = 6.5$  Hz, 3H);  $^{13}\text{C}$  NMR (151 MHz,  $\text{CDCl}_3$ )  $\delta$  130.3, 123.2, 113.5, 112.4, 45.4, 33.8, 30.3, 23.9, 21.1, 21.0, 20.7, 19.4, 18.1; HRMS–ACPI  $[\text{M} + \text{H}]^+$  Calcd for  $\text{C}_{13}\text{H}_{21}\text{N}_2$  205.1699, found 205.1696.

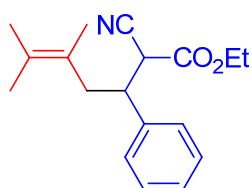

#### Ethyl 2-cyano-5,6-dimethyl-3-phenylhept-5-enoate (**27**)

Following the typical procedure **III**, tetramethylethylene **5** (95  $\mu\text{L}$ , 0.8 mmol, 4.0 equiv), ethyl 2-cyano-3-phenylacrylate (41 mg, 0.2 mmol, 1.0 equiv), and 9-mesityl-10-methylacridinium perchlorate **4** (2.1 mg, 0.005 mmol, 0.025 equiv) in DCE (4.0 mL) were employed to give the product **27** (35.1 mg) in 62% yield as a diastereomeric mixture with 1.4:1 dr; colorless oil;  $^1\text{H}$  NMR (400 MHz,  $\text{CDCl}_3$ )  $\delta$  7.29 – 7.17 (m,  $5\text{H}_{\text{Major}}$ ), 7.29 – 7.17 (m,  $5\text{H}_{\text{Minor}}$ ), 4.03 (q,  $J = 7.1$  Hz,  $2\text{H}_{\text{Major}}$ ), 4.03 (q,  $J = 7.1$  Hz,  $2\text{H}_{\text{Minor}}$ ), 3.71 (d,  $J = 5.2$  Hz,  $1\text{H}_{\text{Major}}$ ), 3.62 (d,  $J = 6.4$  Hz,  $\text{H}_{\text{Minor}}$ ), 3.49 – 3.38 (m,  $1\text{H}_{\text{Major}}$ ), 3.49 – 3.38 (m,  $1\text{H}_{\text{Minor}}$ ), 2.79 (dd,  $J = 13.9, 9.6$  Hz,  $1\text{H}_{\text{Major}}$ ), 2.68 (dd,  $J = 13.6, 5.8$  Hz,  $1\text{H}_{\text{Minor}}$ ), 2.49 (dd,  $J = 13.6, 9.3$  Hz,  $1\text{H}_{\text{Minor}}$ ), 2.34 (dd,  $J = 13.9, 6.1$  Hz,  $1\text{H}_{\text{Major}}$ ), 1.65 (s,  $3\text{H}_{\text{Major}}$ ), 1.58 (s,  $6\text{H}_{\text{Major}}$ ), 1.48 (s,  $3\text{H}_{\text{Minor}}$ ), 1.47 (s,  $3\text{H}_{\text{Minor}}$ ), 1.43 (s,  $3\text{H}_{\text{Minor}}$ ), 1.08 (t,  $J = 7.2$  Hz,  $3\text{H}_{\text{Minor}}$ ), 1.05 (t,  $J = 7.1$  Hz,  $3\text{H}_{\text{Major}}$ );  $^{13}\text{C}$  NMR (101 MHz,  $\text{CDCl}_3$ )  $\delta$  165.8, 165.2, 139.7, 139.0, 129.1, 128.6, 128.5, 128.2, 128.1, 127.9, 127.8, 127.6, 123.5, 123.4, 116.2, 115.8, 62.6, 62.5, 44.8, 44.5, 44.2, 42.9, 38.2, 37.8, 20.9, 20.7, 20.6, 20.4, 18.5, 18.3, 13.8, 13.7; HRMS–ESI  $[\text{M} + \text{Na}]^+$  Calcd for  $\text{C}_{18}\text{H}_{23}\text{NO}_2\text{Na}$  308.1621, found 308.1620.

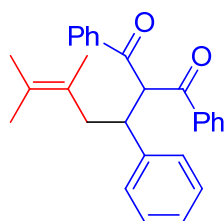

#### 2-(3,4-Dimethyl-1-phenylpent-3-en-1-yl)-1,3-diphenylpropane-1,3-dione (**28**)

Following the typical procedure **III**, tetramethylethylene **5** (95  $\mu\text{L}$ , 0.8 mmol, 4.0 equiv),

2-benzylidene-1,3-diphenylpropane-1,3-dione (63 mg, 0.2 mmol, 1.0 equiv), and 9-mesityl-10-methylacridinium perchlorate **4** (2.1 mg, 0.005 mmol, 0.025 equiv) in DCE (4.0 mL) were employed to give the product **28** (19.6 mg) in 25% yield as a colorless oil. <sup>1</sup>H NMR (400 MHz, CDCl<sub>3</sub>) δ 8.08 – 8.00 (m, 2H), 7.73 – 7.66 (m, 2H), 7.49 (ddd, *J* = 6.7, 3.9, 1.3 Hz, 1H), 7.44 – 7.37 (m, 2H), 7.36 – 7.30 (m, 1H), 7.25 – 7.17 (m, 2H), 7.14 – 7.08 (m, 2H), 7.06 – 6.99 (m, 2H), 6.96 (ddd, *J* = 7.1, 3.8, 1.3 Hz, 1H), 5.66 (d, *J* = 10.7 Hz, 1H), 4.05 (ddd, *J* = 10.6, 8.7, 6.4 Hz, 1H), 2.37 – 2.26 (m, 2H), 1.33 (s, 3H), 1.30 (s, 3H), 1.26 (s, 3H); <sup>13</sup>C NMR (101 MHz, CDCl<sub>3</sub>) δ 194.5, 141.5, 137.4, 137.2, 133.4, 132.9, 128.9, 128.8, 128.6, 128.5, 128.3, 127.9, 126.9, 126.4, 124.8, 64.5, 46.2, 40.1, 20.5, 20.2, 18.5; HRMS–ESI [*M* – H]<sup>–</sup> Calcd for C<sub>28</sub>H<sub>27</sub>O<sub>2</sub> 395.2017, found 395.2014.

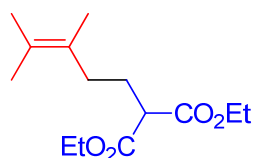

#### Diethyl 2-(3,4-dimethylpent-3-en-1-yl)malonate (**29**)

Following the typical procedure **III**, tetramethylethylene **5** (95 μL, 0.8 mmol, 4.0 equiv), diethyl 2-methylenemalonate (35 mg, 0.2 mmol, 1.0 equiv), and 9-mesityl-10-methylacridinium perchlorate **4** (2.1 mg, 0.005 mmol, 0.025 equiv) in DCE (4.0 mL) were employed to give the product **29** (26.6 mg) in 52% yield as a colorless oil. <sup>1</sup>H NMR (300 MHz, CDCl<sub>3</sub>) δ 4.25 – 4.12 (m, 4H), 3.27 (t, *J* = 7.2 Hz, 1H), 2.06 (dd, *J* = 9.0, 5.4 Hz, 2H), 2.00 – 1.87 (m, 2H), 1.62 (s, 9H), 1.26 (t, *J* = 7.1 Hz, 6H); <sup>13</sup>C NMR (75 MHz, CDCl<sub>3</sub>) δ 169.5, 126.1, 125.6, 61.2, 51.7, 32.0, 27.2, 20.6, 20.1, 18.1, 14.1; GC/MS (*m/z*, relative intensity) 256 (*M*<sup>+</sup>, 3), 173 (48), 161 (25), 96 (100), 81 (48), 55 (25).

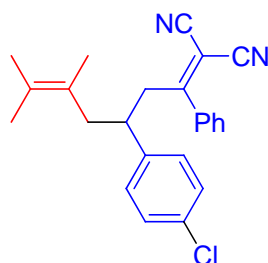

#### 2-(3-(4-Chlorophenyl)-5,6-dimethyl-1-phenylhept-5-en-1-ylidene) malonitrile (**30**)

Following the typical procedure **III**, tetramethylethylene **5** (95 μL, 0.8 mmol, 4.0 equiv), (*E*)-2-(3-(4-chlorophenyl)-1-phenylallylidene)malonitrile (58 mg, 0.2 mmol, 1.0 equiv), and 9-mesityl-10-methylacridinium perchlorate **4** (2.1 mg, 0.005 mmol, 0.025 equiv) in DCE (4.0 mL)

were employed to give the product **30** (36 mg) in 48% yield as a pale yellow oil.  $^1\text{H}$  NMR (300 MHz,  $\text{CDCl}_3$ )  $\delta$  7.65 – 7.42 (m, 3H), 7.26 (d,  $J = 7.9$  Hz, 4H), 6.93 (d,  $J = 8.3$  Hz, 2H), 3.37 – 3.19 (m, 2H), 2.78 – 2.60 (m, 1H), 2.51 (dd,  $J = 13.5, 8.3$  Hz, 1H), 2.24 (dd,  $J = 13.4, 7.0$  Hz, 1H), 1.65 (s, 3H), 1.59 (s, 3H), 1.47 (s, 3H);  $^{13}\text{C}$  NMR (75 MHz,  $\text{CDCl}_3$ )  $\delta$  178.7, 140.3, 134.3, 132.8, 131.9, 129.1, 128.8, 128.7, 127.9, 127.4, 124.2, 112.6, 112.4, 85.7, 43.5, 42.5, 41.8, 20.7, 20.5, 18.5; HRMS–ESI  $[\text{M} - \text{H}]^-$  Calcd for  $\text{C}_{24}\text{H}_{22}\text{ClN}_2$  373.1477, found 373.1479.

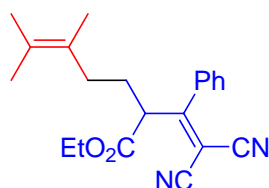

**Ethyl 2-(2,2-dicyano-1-phenylvinyl)-5,6-dimethylhept-5-enoate (31)**

Following the typical procedure **III**, tetramethylethylene **5** (95  $\mu\text{L}$ , 0.8 mmol, 4.0 equiv), ethyl 4,4-dicyano-2-methylene-3-phenylbut-3-enoate (51 mg, 0.2 mmol, 1.0 equiv), and 9-mesityl-10-methylacridinium perchlorate **4** (2.1 mg, 0.005 mmol, 0.025 equiv) in DCE (4.0 mL) were employed to give the product **31** (42 mg) in 63% yield as a pale yellow oil.  $^1\text{H}$  NMR (300 MHz,  $\text{CDCl}_3$ )  $\delta$  7.57 – 7.41 (m, 3H), 7.36 (dd,  $J = 5.9, 4.8$  Hz, 2H), 4.21 (q,  $J = 7.2$  Hz, 2H), 4.03 (t,  $J = 7.0$  Hz, 1H), 2.23 – 2.09 (m, 1H), 2.09 – 1.91 (m, 2H), 1.62 (s, 3H), 1.54 (s, 6H), 1.29 – 1.21 (m, 3H);  $^{13}\text{C}$  NMR (75 MHz,  $\text{CDCl}_3$ )  $\delta$  176.1, 168.9, 133.4, 131.7, 129.0, 127.6, 126.6, 125.2, 112.2, 111.9, 88.9, 62.2, 51.9, 32.1, 28.5, 20.6, 20.1, 17.9, 13.9; HRMS–ESI  $[\text{M} - \text{H}]^-$  Calcd for  $\text{C}_{21}\text{H}_{23}\text{N}_2\text{O}_2$  335.1765, found 335.1768.

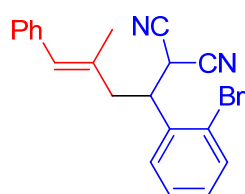

**(E)-2-(1-(2-bromophenyl)-3-methyl-4-phenylbut-3-en-1-yl) malononitrile (32)**

In batch: following the typical procedure **III**, (2-methylprop-1-en-1-yl)benzene (106 mg, 0.8 mmol, 4.0 equiv), 2-(2-bromobenzylidene)malononitrile (47 mg, 0.2 mmol, 1.0 equiv), and 9-mesityl-10-methylacridinium perchlorate **4** (4.1 mg, 0.01 mmol, 0.05 equiv) in DCE (2.0 mL) were employed to give the product **32** and a minor uncharacterized isomeric product (combined 45.6 mg) in 63% yield and 7:1 rr as colorless oil. In “stop-flow micro tubing” reactor: following the typical procedure **IV** using a HPFA tubing (total volume 1.5 mL) to afford product **32** and a minor uncharacterized isomeric product (combined 30.5 mg) in 56% yield and 7:1 rr.  $^1\text{H}$  NMR

(400 MHz, CDCl<sub>3</sub>) δ 7.66 (dd, *J* = 8.0, 1.3 Hz, 1H), 7.54 (dd, *J* = 7.9, 1.5 Hz, 1H), 7.41 (td, *J* = 7.6, 1.2 Hz, 1H), 7.34 – 7.28 (m, 2H), 7.27 – 7.18 (m, 2H), 7.14 (d, *J* = 7.2 Hz, 2H), 6.41 (s, 1H), 4.32 – 4.20 (m, 1H), 4.09 (d, *J* = 4.8 Hz, 1H), 2.97 (dd, *J* = 14.1, 7.4 Hz, 1H), 2.84 (dd, *J* = 14.0, 8.3 Hz, 1H), 1.89 (d, *J* = 1.3 Hz, 3H); <sup>13</sup>C NMR (101 MHz, CDCl<sub>3</sub>) δ 137.2, 135.8, 133.7, 132.6, 130.3, 129.9, 128.8, 128.3, 128.1, 126.7, 125.1, 111.8, 111.3, 42.3, 27.9, 17.6; HRMS–ESI [*M* – H]<sup>–</sup> Calcd for C<sub>20</sub>H<sub>16</sub>BrN<sub>2</sub> 363.0502, found 363.0508.

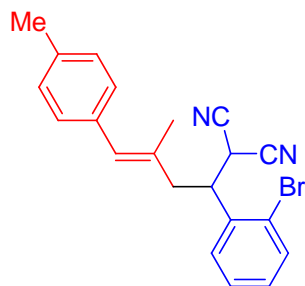

**(*E*)-2-(1-(2-bromophenyl)-3-methyl-4-(*p*-tolyl)but-3-en-1-yl)malononitrile (**33**)**

In batch: following the typical procedure **III**, 1-methyl-4-(2-methylprop-1-en-1-yl)benzene (117 mg, 0.8 mmol, 4.0 equiv), 2-(2-bromobenzylidene)malononitrile (47 mg, 0.2 mmol, 1.0 equiv), and 9-mesityl-10-methylacridinium perchlorate **4** (4.1 mg, 0.01 mmol, 0.05 equiv) in DCE (2.0 mL) were employed to give the product **33** and a minor uncharacterized isomeric product (combined 56.7 mg) in 75% yield and 7:1 rr as colorless oil. In “stop-flow micro tubing” reactor: following the typical procedure **IV** using a HPFA tubing (total volume 1.5 mL) to afford product **33** and a minor uncharacterized isomeric product (combined 36.2 mg) in 64% yield and 7:1 rr. <sup>1</sup>H NMR (400 MHz, CDCl<sub>3</sub>) δ 7.65 (dd, *J* = 8.0, 1.3 Hz, 1H), 7.54 (dd, *J* = 7.9, 1.5 Hz, 1H), 7.41 (td, *J* = 7.6, 1.2 Hz, 1H), 7.23 (ddd, *J* = 8.0, 7.5, 1.6 Hz, 1H), 7.12 (d, *J* = 7.9 Hz, 2H), 7.05 (d, *J* = 8.1 Hz, 2H), 6.38 (s, 1H), 4.29 – 4.20 (m, 1H), 4.09 (d, *J* = 4.9 Hz, 1H), 2.95 (ddd, *J* = 13.9, 7.5, 0.8 Hz, 1H), 2.82 (dd, *J* = 14.0, 8.2 Hz, 1H), 2.33 (s, 3H), 1.89 (d, *J* = 1.3 Hz, 3H); <sup>13</sup>C NMR (101 MHz, CDCl<sub>3</sub>) δ 136.4, 135.9, 134.3, 133.7, 131.8, 130.2, 129.9, 128.8, 128.7, 128.3, 125.1, 111.8, 111.3, 42.4, 27.9, 21.1, 17.6; HRMS–ACPI [*M* + H]<sup>+</sup> Calcd for C<sub>21</sub>H<sub>20</sub>BrN<sub>2</sub> 379.0804, found 379.0805.

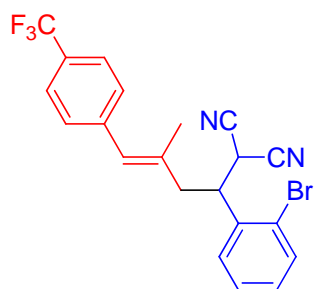

**(E)-2-(1-(2-bromophenyl)-3-methyl-4-(4-(trifluoromethyl)phenyl)but-3-en-1-yl)malononitrile (34)**

In batch: following the typical procedure **III**, 1-(2-methylprop-1-en-1-yl)-4-(trifluoromethyl)benzene (160 mg, 0.8 mmol, 4.0 equiv), 2-(2-bromobenzylidene)malononitrile (47 mg, 0.2 mmol, 1.0 equiv), and 9-mesityl-10-methylacridinium perchlorate **4** (4.1 mg, 0.01 mmol, 0.05 equiv) in DCE (2.0 mL) were employed to give the product **34** and a minor uncharacterized isomeric product (combined 18.6 mg) in 21% yield and 7:1 rr as colorless oil. In “stop-flow micro tubing” reactor: following the typical procedure **IV** using a HPFA tubing (total volume 1.5 mL) to afford product **34** and a minor uncharacterized isomeric product (combined 22 mg) in 34% yield and 7:1 rr. <sup>1</sup>H NMR (600 MHz, CDCl<sub>3</sub>) δ 7.66 (d, *J* = 8.1 Hz, 1H), 7.53 (dd, *J* = 19.7, 7.8 Hz, 3H), 7.42 (t, *J* = 7.5 Hz, 1H), 7.29 – 7.19 (m, 3H), 6.41 (s, 1H), 4.25 (br s, 1H), 4.08 (br s, 1H), 3.01 (dd, *J* = 14.0, 7.1 Hz, 1H), 2.87 (dd, *J* = 13.8, 8.6 Hz, 1H), 1.88 (s, 3H); <sup>13</sup>C NMR (151 MHz, CDCl<sub>3</sub>) δ 140.7, 135.6, 135.0, 133.8, 130.9, 130.4, 128.9, 128.7, 128.6 (q, *J* = 33.5 Hz), 128.4, 125.1 (q, *J* = 3.8 Hz), 124.1 (q, *J* = 272.9 Hz), 111.7, 111.1, 42.1, 28.0, 17.7; HRMS–ESI [*M* – *H*]<sup>–</sup> Calcd for C<sub>21</sub>H<sub>15</sub>BrF<sub>3</sub>N<sub>2</sub> 431.0376, found 431.0378.

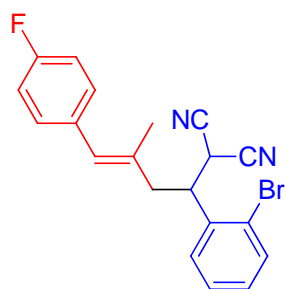

**(E)-2-(1-(2-bromophenyl)-4-(4-fluorophenyl)-3-methylbut-3-en-1-yl)malononitrile (35)**

In batch: following the typical procedure **III**, 1-fluoro-4-(2-methylprop-1-en-1-yl)benzene (120 mg, 0.8 mmol, 4.0 equiv), 2-(2-bromobenzylidene)malononitrile (47 mg, 0.2 mmol, 1.0 equiv), and 9-mesityl-10-methylacridinium perchlorate **4** (4.1 mg, 0.01 mmol, 0.05 equiv) in DCE (2.0 mL) were employed to give the product **35** and a minor uncharacterized isomeric product

(combined 31.1 mg) in 41% yield and 4:1 rr as colorless oil. In “stop-flow micro tubing” reactor: following the typical procedure **IV** using a HPFA tubing (total volume 1.5 mL) to afford product **35** and a minor uncharacterized isomeric product (combined 36 mg) in 63% yield and 5:1 rr.  $^1\text{H}$  NMR (400 MHz,  $\text{CDCl}_3$ )  $\delta$  7.66 (dd,  $J = 8.0, 1.3$  Hz, 1H), 7.52 (dd,  $J = 7.9, 1.5$  Hz, 1H), 7.41 (td,  $J = 7.6, 1.2$  Hz, 1H), 7.24 (ddd,  $J = 8.0, 7.5, 1.9$  Hz, 1H), 7.16 – 7.07 (m, 2H), 7.03 – 6.94 (m, 2H), 6.37 (s, 1H), 4.28 – 4.20 (m, 1H), 4.09 (d,  $J = 4.7$  Hz, 1H), 2.96 (ddd,  $J = 14.0, 7.5, 0.8$  Hz, 1H), 2.83 (dd,  $J = 14.0, 8.2$  Hz, 1H), 1.86 (d,  $J = 1.2$  Hz, 3H);  $^{13}\text{C}$  NMR (101 MHz,  $\text{CDCl}_3$ )  $\delta$  161.5 (d,  $J = 246.4$  Hz), 135.9, 133.8, 133.2 (d,  $J = 3.4$  Hz), 132.7 (d,  $J = 1.2$  Hz), 130.4, 130.3 (d,  $J = 2.9$  Hz), 128.9, 128.4, 125.1, 115.1 (d,  $J = 21.4$  Hz), 111.8, 111.2, 42.2, 27.9, 17.5; HRMS–ESI [ $\text{M} - \text{H}$ ] Calcd for  $\text{C}_{20}\text{H}_{15}\text{BrFN}_2$  381.0408, found 381.0410.

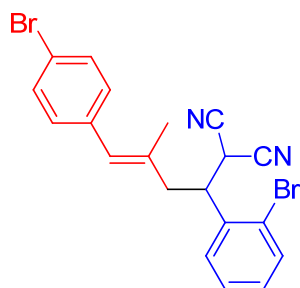

**(E)-2-(1-(2-bromophenyl)-4-(4-bromophenyl)-3-methylbut-3-en-1-yl)malononitrile (36)**

In batch: following the typical procedure **III**, 1-bromo-4-(2-methylprop-1-en-1-yl)benzene (169 mg, 0.8 mmol, 4.0 equiv), 2-(2-bromobenzylidene)malononitrile (47 mg, 0.2 mmol, 1.0 equiv), and 9-mesityl-10-methylacridinium perchlorate **4** (4.1 mg, 0.01 mmol, 0.05 equiv) in DCE (2.0 mL) were employed to give the product **36** and a minor uncharacterized isomeric product (combined 36.4 mg) in 41% yield and 6:1 rr as colorless oil. In “stop-flow micro tubing” reactor: following the typical procedure **IV** using a HPFA tubing (total volume 1.5 mL) to afford product **36** and a minor uncharacterized isomeric product (combined 45 mg) in 68% yield and 6:1 rr.  $^1\text{H}$  NMR (400 MHz,  $\text{CDCl}_3$ )  $\delta$  7.66 (dd,  $J = 8.0, 1.2$  Hz, 1H), 7.51 (dd,  $J = 7.9, 1.5$  Hz, 1H), 7.45 – 7.40 (m, 3H), 7.27 – 7.22 (m, 1H), 7.00 (d,  $J = 8.4$  Hz, 2H), 6.33 (s, 1H), 4.29 – 4.19 (m, 1H), 4.08 (d,  $J = 4.7$  Hz, 1H), 2.96 (dd,  $J = 13.7, 6.9$  Hz, 1H), 2.83 (dd,  $J = 14.0, 8.3$  Hz, 1H), 1.86 (d,  $J = 1.3$  Hz, 3H);  $^{13}\text{C}$  NMR (101 MHz,  $\text{CDCl}_3$ )  $\delta$  136.0, 135.8, 133.8, 133.6, 131.3, 130.4, 128.8, 128.4, 125.1, 120.6, 111.7, 111.2, 42.2, 27.9, 17.6; HRMS–ACPI [ $\text{M} + \text{H}$ ] $^+$  Calcd for  $\text{C}_{20}\text{H}_{17}\text{Br}_2\text{N}_2$  442.9753, found 442.9746.

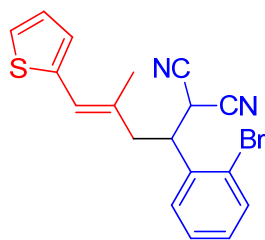

**(E)-2-(1-(2-bromophenyl)-3-methyl-4-(thiophen-2-yl)but-3-en-1-yl)malononitrile (37)**

In batch: following the typical procedure **III**, 2-(2-methylprop-1-en-1-yl)thiophene (111 mg, 0.8 mmol, 4.0 equiv), 2-(2-bromobenzylidene)malononitrile (47 mg, 0.2 mmol, 1.0 equiv), and 9-mesityl-10-methylacridinium perchlorate **4** (4.1 mg, 0.01 mmol, 0.05 equiv) in DCE (2.0 mL) were employed to give the product **37** and a minor uncharacterized isomeric product (combined 11.1 mg) in 15% yield and 5:1 rr as pale yellow oil. In “stop-flow micro tubing” reactor: following the typical procedure **IV** using a HPFA tubing (total volume 1.5 mL) to afford product **37** and a minor uncharacterized isomeric product (combined 23.8 mg) in 43% yield and 5:1 rr. <sup>1</sup>H NMR (600 MHz, CDCl<sub>3</sub>) δ 7.65 (dd, *J* = 8.0, 1.0 Hz, 1H), 7.53 (d, *J* = 7.6 Hz, 1H), 7.41 (t, *J* = 7.6 Hz, 1H), 7.26 – 7.20 (m, 2H), 7.00 (dd, *J* = 5.0, 3.6 Hz, 1H), 6.94 (d, *J* = 3.3 Hz, 1H), 6.55 (s, 1H), 4.26 – 4.18 (m, 1H), 4.07 (s, 1H), 2.95 (dd, *J* = 14.1, 7.7 Hz, 1H), 2.84 (dd, *J* = 14.0, 7.9 Hz, 1H), 2.02 (s, 3H); <sup>13</sup>C NMR (151 MHz, CDCl<sub>3</sub>) δ 139.9, 135.7, 133.8, 130.9, 130.3, 128.4, 128.2, 127.4, 126.8, 125.2, 123.1, 111.7, 111.2, 42.7, 27.8, 18.2; HRMS–ACPI [M + H]<sup>+</sup> Calcd for C<sub>18</sub>H<sub>16</sub>BrN<sub>2</sub>S 371.0212, found 371.0209.

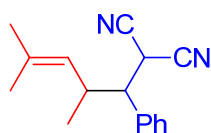

**2-(2,4-Dimethyl-1-phenylpent-3-en-1-yl)malononitrile (38)**

Following the typical procedure **III**, 2-methylpent-2-ene (99 μL, 0.8 mmol, 4.0 equiv), 2-benzylidenemalononitrile (31 mg, 0.2 mmol, 1.0 equiv), and 9-mesityl-10-methylacridinium perchlorate **4** (2.1 mg, 0.005 mmol, 0.025 equiv) in DCE (4.0 mL) were employed to give the product **38** as inseparable diastereomeric and regioisomeric mixtures (combined 41.9 mg) in 88% yield, 3.9:1 rr, and 1.6:1 dr as colorless oil. Data for the major and minor diastereomers: <sup>1</sup>H NMR (600 MHz, CDCl<sub>3</sub>) δ 7.46 – 7.32 (m, 4H<sub>major</sub>), 7.46 – 7.32 (m, 4H<sub>minor</sub>), 7.17 (dd, *J* = 7.8, 1.2 Hz, 1H<sub>major</sub>), 7.17 (dd, *J* = 7.8, 1.2 Hz, 1H<sub>minor</sub>), 4.95 (d, *J* = 10.1 Hz, 1H<sub>minor</sub>), 4.78 (d, *J* = 10.2 Hz, 1H<sub>major</sub>), 4.25 (d, *J* = 4.0 Hz, 1H<sub>minor</sub>), 4.10 (d, *J* = 9.2 Hz, 1H<sub>major</sub>), 3.20 (dd, *J* = 9.2, 6.1 Hz, 1H<sub>major</sub>), 3.17 – 3.05 (m, 1H<sub>major</sub>), 3.17 – 3.05 (m, 1H<sub>minor</sub>), 2.82 (dd, *J* = 11.2, 4.0 Hz, 1H<sub>minor</sub>),

1.82 (dd,  $J = 15.6, 0.9$  Hz,  $3H_{major}$ ), 1.69 – 1.65 (m,  $3H_{minor}$ ), 1.67 (dd,  $J = 4.2, 1.0$  Hz,  $3H_{major}$ ), 1.67 (dd,  $J = 4.2, 1.0$  Hz,  $3H_{minor}$ ), 0.99 (d,  $J = 6.7$  Hz,  $3H_{major}$ ), 0.82 (d,  $J = 6.5$  Hz,  $3H_{minor}$ );  $^{13}\text{C}$  NMR (151 MHz,  $\text{CDCl}_3$ )  $\delta$  136.4, 135.9, 135.3, 134.8, 132.5, 129.1, 128.7, 128.6, 128.5, 127.9, 126.6, 123.8, 112.8, 112.5, 112.2, 112.1, 52.9, 52.3, 34.9, 34.4, 28.5, 27.0, 26.1, 26.0, 19.8, 19.3, 18.4, 18.3; HRMS–ESI  $[\text{M} - \text{H}]^-$  Calcd for  $\text{C}_{16}\text{H}_{17}\text{N}_2$  237.1397, found 237.1392.

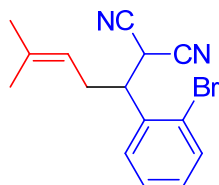

### 2-(1-(2-Bromophenyl)-4-methylpent-3-en-1-yl)malononitrile (**39**)

Following the typical procedure **III**, 2-methylbut-2-ene (67  $\mu\text{L}$ , 0.8 mmol, 4.0 equiv), 2-(2-bromobenzylidene)malononitrile (47 mg, 0.2 mmol, 1.0 equiv), and 9-mesityl-10-methylacridinium perchlorate **4** (2.1 mg, 0.005 mmol, 0.025 equiv) in DCE (4.0 mL) were employed to give the product **39** as inseparable regioisomeric mixtures (combined 38 mg) in 63% yield and 1.4:1 rr as colorless oil. Data for the major and minor regioisomers:  $^1\text{H}$  NMR (600 MHz,  $\text{CDCl}_3$ )  $\delta$  7.60 – 7.53 (m,  $1H_{major}$ ), 7.60 – 7.53 (m,  $1H_{minor}$ ), 7.41 (d,  $J = 8.0$  Hz,  $1H_{minor}$ ), 7.39 – 7.35 (m,  $1H_{major}$ ), 7.34 – 7.28 (m,  $1H_{major}$ ), 7.34 – 7.28 (m,  $1H_{minor}$ ), 7.18 – 7.12 (m,  $1H_{major}$ ), 7.18 – 7.12 (m,  $1H_{minor}$ ), 5.41 – 5.33 (m,  $1H_{minor}$ ), 4.92 (td,  $J = 6.4, 1.3$  Hz,  $1H_{major}$ ), 4.07 – 4.00 (m,  $1H_{major}$ ), 4.07 – 4.00 (m,  $1H_{minor}$ ), 3.95 (d,  $J = 4.3$  Hz,  $1H_{minor}$ ), 3.86 (dd,  $J = 13.1, 7.3$  Hz,  $1H_{major}$ ), 2.78 – 2.64 (m,  $2H_{major}$ ), 2.64 – 2.51 (m,  $2H_{minor}$ ), 1.62 (d,  $J = 5.5$  Hz,  $3H_{major}$ ), 1.60 – 1.55 (m,  $3H_{minor}$ ), 1.52 – 1.47 (m,  $3H_{major}$ ), 1.52 – 1.47 (m,  $3H_{minor}$ );  $^{13}\text{C}$  NMR (151 MHz,  $\text{CDCl}_3$ )  $\delta$  137.2, 136.2, 135.9, 133.7, 133.6, 130.2, 130.1, 130.0, 128.3, 128.2, 124.6, 124.3, 118.3, 111.9, 111.7, 111.4, 44.6, 41.5, 29.8, 27.7, 27.6, 25.8, 23.1, 18.1, 15.4, 13.6; HRMS–ESI  $[\text{M} - \text{H}]^-$  Calcd for  $\text{C}_{15}\text{H}_{14}\text{BrN}_2$  301.0346, found 301.0343.

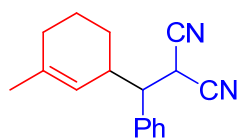

### 2-((3-Methylcyclohex-2-en-1-yl)(phenyl)methyl)malononitrile (**40**)

Following the typical procedure **III**, 1-methylcyclohex-1-ene (77 mg, 0.8 mmol, 4.0 equiv), 2-benzylidenemalononitrile (31 mg, 0.2 mmol, 1.0 equiv), and 9-mesityl-10-methylacridinium perchlorate **4** (2.1 mg, 0.005 mmol, 0.025 equiv) in DCE (4.0 mL) were employed to give the



product **40** as two separable diastereomers and other trace amount of uncharacterized isomeric products (combined 39.2 mg) in 79% yield, 1.1:1 dr, and >10:1 rr as colorless oil. Data for the major diastereomer:  $^1\text{H}$  NMR (600 MHz,  $\text{CDCl}_3$ )  $\delta$  7.45 – 7.38 (m, 3H), 7.36 (d,  $J = 6.7$  Hz, 2H), 4.92 (s, 1H), 4.17 (d,  $J = 4.8$  Hz, 1H), 2.94 – 2.83 (m, 2H), 2.01 – 1.95 (m, 1H), 1.90 (s, 2H), 1.87 – 1.81 (m, 1H), 1.67 – 1.57 (m, 2H), 1.56 (s, 3H);  $^{13}\text{C}$  NMR (151 MHz,  $\text{CDCl}_3$ )  $\delta$  137.6, 136.5, 129.1, 128.8, 128.6, 120.4, 112.0, 111.7, 51.5, 37.3, 29.7, 27.6, 27.5, 23.9, 21.6; HRMS–ESI [ $\text{M} - \text{H}$ ] $^-$  Calcd for  $\text{C}_{17}\text{H}_{17}\text{N}_2$  249.1397, found 249.1389.

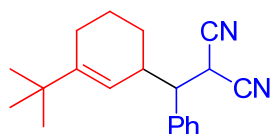

**2-((3-(*Tert*-butyl)cyclohex-2-en-1-yl)(phenyl)methyl)malononitrile (**41**)**

Following the typical procedure **III**, 1-(*tert*-butyl)cyclohex-1-ene (110 mg, 0.8 mmol, 4.0 equiv), 2-benzylidenemalononitrile (31 mg, 0.2 mmol, 1.0 equiv), and 9-mesityl-10-methylacridinium perchlorate **4** (2.1 mg, 0.005 mmol, 0.025 equiv) in DCE (4.0 mL) were employed to give the product **41** as two separable diastereomers and other trace amount of uncharacterized isomeric products (combined 43.9 mg) in 75% yield, 1.3:1 dr, and >20:1 rr. The major diastereomer is a colorless solid:  $^1\text{H}$  NMR (600 MHz,  $\text{CDCl}_3$ )  $\delta$  7.44 – 7.36 (m, 3H), 7.36 – 7.32 (m, 2H), 5.02 (s, 1H), 4.19 (d,  $J = 5.7$  Hz, 1H), 2.95 (dd,  $J = 9.7, 5.7$  Hz, 1H), 2.89 (dd,  $J = 7.4, 4.5$  Hz, 1H), 2.06 (d,  $J = 17.1$  Hz, 1H), 2.00 – 1.93 (m, 1H), 1.93 – 1.78 (m, 2H), 1.55 – 1.48 (m, 1H), 1.28 – 1.20 (m, 1H), 0.90 (s, 9H);  $^{13}\text{C}$  NMR (151 MHz,  $\text{CDCl}_3$ )  $\delta$  149.2, 136.6, 129.0, 128.7, 128.5, 116.8, 112.1, 111.9, 51.9, 37.7, 35.5, 28.7, 27.7, 27.3, 24.3, 22.1; the minor diastereomer is a colorless oil:  $^1\text{H}$  NMR (600 MHz,  $\text{CDCl}_3$ )  $\delta$  7.43 – 7.37 (m, 3H), 7.37 – 7.32 (m, 2H), 5.57 – 5.52 (m, 1H), 4.22 (d,  $J = 5.0$  Hz, 1H), 3.02 (dd,  $J = 10.3, 5.0$  Hz, 1H), 2.87 – 2.79 (m, 1H), 2.09 – 1.97 (m, 2H), 1.64 – 1.57 (m, 1H), 1.55 – 1.43 (m, 2H), 1.21 – 1.12 (m, 1H), 1.07 (s, 9H);  $^{13}\text{C}$  NMR (151 MHz,  $\text{CDCl}_3$ )  $\delta$  151.3, 136.9, 129.1, 128.7, 128.2, 116.0, 112.3, 112.0, 51.7, 36.6, 35.8, 28.9, 27.5, 25.9, 24.6, 20.4; HRMS–ESI [ $\text{M} - \text{H}$ ] $^-$  Calcd for  $\text{C}_{20}\text{H}_{23}\text{N}_2$  291.1867, found 291.1870.

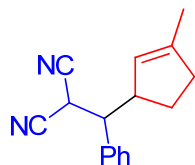

**2-((3-Methylcyclopent-2-en-1-yl)(phenyl)methyl)malononitrile (**42**)**

Following the typical procedure **III**, 1-methylcyclopent-1-ene (66 mg, 0.8 mmol, 4.0 equiv),

2-benzylidenemalononitrile (31 mg, 0.2 mmol, 1.0 equiv), and 9-mesityl-10-methylacridinium perchlorate **4** (2.1 mg, 0.005 mmol, 0.025 equiv) in DCE (4.0 mL) were employed to give the product **42** as two separable diastereomers and other trace amount of uncharacterized isomeric products (combined 44.4 mg) in 94% yield, 2.9:1 dr, and >10:1 rr. Data for the major diastereomer:  $^1\text{H}$  NMR (500 MHz,  $\text{CDCl}_3$ )  $\delta$  7.45 – 7.33 (m, 5H), 5.45 (s, 1H), 4.11 (d,  $J = 4.7$  Hz, 1H), 3.43 – 3.34 (m, 1H), 2.93 (dd,  $J = 10.6, 4.7$  Hz, 1H), 2.33 – 2.12 (m, 2H), 2.01 – 1.90 (m, 1H), 1.78 (s, 3H), 1.48 – 1.38 (m, 1H);  $^{13}\text{C}$  NMR (126 MHz,  $\text{CDCl}_3$ )  $\delta$  146.0, 136.9, 129.0, 128.7, 128.4, 123.3, 112.1, 111.8, 51.8, 47.6, 35.6, 29.4, 28.3, 16.8; HRMS–APCI  $[\text{M} + \text{H}]^+$  Calcd for  $\text{C}_{16}\text{H}_{17}\text{N}_2$  237.1386, found 237.1383.

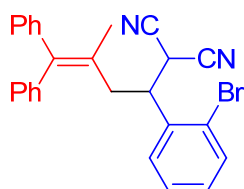

**2-(1-(2-Bromophenyl)-3-methyl-4,4-diphenylbut-3-en-1-yl)malononitrile (43)**

In batch: following the typical procedure **III**, (2-methylprop-1-ene-1,1-diyl)dibenzene (166 mg, 0.8 mmol, 4.0 equiv), 2-(2-bromobenzylidene)malononitrile (47 mg, 0.2 mmol, 1.0 equiv), and 9-mesityl-10-methylacridinium perchlorate **4** (4.1 mg, 0.01 mmol, 0.05 equiv) in DCE (2.0 mL) were employed to give the product **43** (26 mg) in 30% yield as a colorless oil. In “stop-flow micro tubing” reactor: following the typical procedure **IV** using a HPFA tubing (total volume 1.5 mL) to afford product **43** (47.5 mg) in 72% yield.  $^1\text{H}$  NMR (400 MHz,  $\text{CDCl}_3$ )  $\delta$  7.69 – 7.61 (m, 1H), 7.36 – 7.30 (m, 2H), 7.30 – 7.26 (m, 1H), 7.25 – 7.13 (m, 5H), 7.03 (d,  $J = 6.9$  Hz, 2H), 6.96 – 6.89 (m, 1H), 6.88 – 6.83 (m, 2H), 4.18 (br s, 1H), 3.88 (br s, 1H), 3.09 (dd,  $J = 13.7, 10.5$  Hz, 1H), 2.91 (dd,  $J = 13.7, 5.2$  Hz, 1H), 1.73 (s, 3H);  $^{13}\text{C}$  NMR (101 MHz,  $\text{CDCl}_3$ )  $\delta$  142.4, 142.2, 141.8, 135.1, 133.5, 130.2, 129.6, 129.3, 128.6, 128.4, 128.1, 127.9, 127.0, 126.6, 111.6, 111.1, 36.6, 28.5, 20.1; HRMS–APCI  $[\text{M} + \text{H}]^+$  Calcd for  $\text{C}_{26}\text{H}_{22}\text{BrN}_2$  441.0961, found 441.0953.

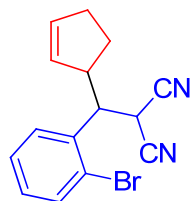

**2-((2-Bromophenyl)(cyclopent-2-en-1-yl)methyl)malononitrile (44)**

Following the typical procedure **III**, cyclopentene (68 mg, 1.0 mmol, 5.0 equiv), 2-(2-bromobenzylidene)malononitrile (47 mg, 0.2 mmol, 1.0 equiv), and

9-mesityl-10-methylacridinium perchlorate **4** (1.0 mg, 0.0025 mmol, 0.0125 equiv) in DCE (2.0 mL) were employed to give the product **44** as inseparable diastereomers (41 mg) in 68% yield and 1.3:1 dr as colorless oil.  $^1\text{H}$  NMR (400 MHz,  $\text{CDCl}_3$ )  $\delta$  7.66 (dd,  $J = 8.1, 1.1$  Hz,  $1\text{H}_{\text{major}}$ ), 7.66 (dd,  $J = 8.1, 1.1$  Hz,  $1\text{H}_{\text{minor}}$ ), 7.57 (ddd,  $J = 18.2, 7.9, 1.6$  Hz,  $1\text{H}_{\text{major}}$ ), 7.57 (ddd,  $J = 18.2, 7.9, 1.6$  Hz,  $1\text{H}_{\text{minor}}$ ), 7.40 (dd,  $J = 10.9, 4.2$  Hz,  $1\text{H}_{\text{major}}$ ), 7.40 (dd,  $J = 10.9, 4.2$  Hz,  $1\text{H}_{\text{minor}}$ ), 7.26 – 7.21 (m,  $1\text{H}_{\text{major}}$ ), 7.26 – 7.21 (m,  $1\text{H}_{\text{minor}}$ ), 6.10 – 6.02 (m,  $1\text{H}_{\text{minor}}$ ), 5.99 – 5.92 (m,  $1\text{H}_{\text{minor}}$ ), 5.88 – 5.81 (m,  $1\text{H}_{\text{major}}$ ), 5.32 – 5.24 (m,  $1\text{H}_{\text{major}}$ ), 4.13 – 4.02 (m,  $1\text{H}_{\text{major}}$ ), 4.13 – 4.02 (m,  $1\text{H}_{\text{minor}}$ ), 3.91 – 3.74 (m,  $1\text{H}_{\text{major}}$ ), 3.91 – 3.74 (m,  $1\text{H}_{\text{minor}}$ ), 3.57 – 3.36 (m,  $1\text{H}_{\text{major}}$ ), 3.57 – 3.36 (m,  $1\text{H}_{\text{minor}}$ ), 2.48 – 2.38 (m,  $3\text{H}_{\text{major}}$ ), 2.37 – 2.30 (m,  $2\text{H}_{\text{minor}}$ ), 1.96 – 1.83 (m,  $1\text{H}_{\text{minor}}$ ), 1.77 – 1.64 (m,  $1\text{H}_{\text{major}}$ ), 1.45 – 1.34 (m,  $1\text{H}_{\text{minor}}$ );  $^{13}\text{C}$  NMR (101 MHz,  $\text{CDCl}_3$ )  $\delta$  136.8, 136.5, 135.9, 134.1, 133.7, 133.6, 130.1, 130.06, 130.05, 129.2, 128.5, 128.3, 128.1, 125.9, 125.7, 111.9, 111.8, 111.3, 111.2, 48.5, 48.3, 48.2, 48.0, 32.5, 31.3, 28.9, 28.7, 27.4, 27.3; HRMS–APCI  $[\text{M} + \text{H}]^+$  Calcd for  $\text{C}_{15}\text{H}_{14}\text{BrN}_2$  301.0335, found 301.0328.

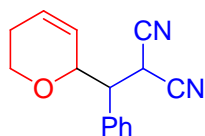

#### 2-((5,6-Dihydro-2H-pyran-2-yl)(phenyl)methyl)malononitrile (**45**)

Following the typical procedure **III**, 3,4-dihydro-2H-pyran (84 mg, 1.0 mmol, 5.0 equiv), 2-benzylidenemalononitrile (31 mg, 0.2 mmol, 1.0 equiv), and 9-mesityl-10-methylacridinium perchlorate **4** (1.0 mg, 0.0025 mmol, 0.0125 equiv) in DCE (2.0 mL) were employed to give the product **45** as two separable diastereomers and other minor uncharacterized isomeric products (combined 36.9 mg) in 78% yield, 2.5:1 dr, and 3:1 rr as colorless oil. Data for the major diastereomer:  $^1\text{H}$  NMR (400 MHz,  $\text{CDCl}_3$ )  $\delta$  7.49 – 7.36 (m, 5H), 5.94 – 5.85 (m, 1H), 5.38 – 5.31 (m, 1H), 4.62 (d,  $J = 4.3$  Hz, 1H), 4.61 – 4.57 (m, 1H), 4.08 (ddd,  $J = 11.3, 5.9, 1.4$  Hz, 1H), 3.76 (ddd,  $J = 11.3, 10.1, 3.8$  Hz, 1H), 3.14 (dd,  $J = 10.4, 4.3$  Hz, 1H), 2.40 – 2.27 (m, 1H), 2.05 – 1.94 (m, 1H);  $^{13}\text{C}$  NMR (101 MHz,  $\text{CDCl}_3$ )  $\delta$  133.9, 129.4, 129.3, 128.8, 127.5, 125.8, 112.3, 111.7, 72.8, 63.8, 51.1, 26.3, 24.9; HRMS–ACPI  $[\text{M} + \text{H}]^+$  Calcd for  $\text{C}_{15}\text{H}_{15}\text{N}_2\text{O}$  239.1179, found 239.1181.

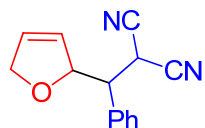

#### 2-((2,5-Dihydrofuran-2-yl)(phenyl)methyl)malononitrile (46)

In batch: following the typical procedure **III**, 2,5-dihydrofuran (70 mg, 1.0 mmol, 5.0 equiv), 2-benzylidenemalononitrile (31 mg, 0.2 mmol, 1.0 equiv), and 9-mesityl-10-methylacridinium perchlorate **4** (1.0 mg, 0.0025 mmol, 0.0125 equiv) in DCE (2.0 mL) were employed to give the product **46** as inseparable diastereomers and other trace amount of uncharacterized isomeric products (combined 19.7 mg) in 44% yield, 1.6:1 dr, and >10:1 rr as colorless oil. In “stop-flow micro tubing” reactor: following the typical procedure **IV** using a HPFA tubing (total volume 1.5 mL) to afford product **46** as inseparable diastereomers and other trace amount of uncharacterized isomeric products (combined 31.3 mg) in 93% yield, 1.6:1 dr, and >10:1 rr.  $^1\text{H}$  NMR (400 MHz,  $\text{CDCl}_3$ )  $\delta$  7.47 – 7.40 (m, 5 $H_{\text{major}}$ ), 7.38 – 7.33 (m, 3 $H_{\text{minor}}$ ), 7.26 – 7.23 (m, 2 $H_{\text{minor}}$ ), 6.01 (ddd,  $J = 6.2, 3.7, 1.7$  Hz, 1 $H_{\text{major}}$ ), 5.82 (ddd,  $J = 6.2, 3.9, 1.6$  Hz, 1 $H_{\text{minor}}$ ), 5.66 (dtd,  $J = 6.3, 2.5, 1.5$  Hz, 1 $H_{\text{minor}}$ ), 5.54 (dtd,  $J = 6.3, 2.5, 1.5$  Hz, 1 $H_{\text{major}}$ ), 5.43 – 5.36 (m, 1 $H_{\text{minor}}$ ), 5.35 – 5.26 (m, 1 $H_{\text{major}}$ ), 4.79 (dddd,  $J = 13.3, 5.7, 2.4, 1.7$  Hz, 1 $H_{\text{major}}$ ), 4.73 (dddd,  $J = 13.3, 4.0, 2.5, 1.7$  Hz, 1 $H_{\text{major}}$ ), 4.62 (dddd,  $J = 13.1, 4.2, 2.5, 1.6$  Hz, 1 $H_{\text{minor}}$ ), 4.55 – 4.47 (m, 1 $H_{\text{minor}}$ ), 4.51 (d,  $J = 4.4$  Hz, 1 $H_{\text{major}}$ ); 4.38 (d,  $J = 10.3$  Hz, 1 $H_{\text{minor}}$ ), 3.46 (dd,  $J = 10.3, 2.9$  Hz, 1 $H_{\text{minor}}$ ), 3.10 (dd,  $J = 9.4, 4.4$  Hz, 1 $H_{\text{major}}$ );  $^{13}\text{C}$  NMR (101 MHz,  $\text{CDCl}_3$ )  $\delta$  134.1, 133.9, 129.4, 129.3, 129.2, 129.1, 128.9, 128.8, 128.4, 126.7, 125.7, 112.3, 112.2, 112.1, 111.7, 85.6, 85.5, 76.2, 75.9, 52.3, 51.1, 26.5, 25.6; HRMS–APCI  $[\text{M} + \text{H}]^+$  Calcd for  $\text{C}_{14}\text{H}_{13}\text{N}_2\text{O}$  225.1022, found 225.1023.

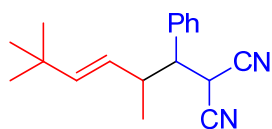

#### (E)-2-(2,5,5-trimethyl-1-phenylhex-3-en-1-yl)malononitrile (47)

In batch: following the typical procedure **III**, (E)-2,2-dimethylhex-3-ene (112 mg, 1.0 mmol, 5.0 equiv), 2-benzylidenemalononitrile (31 mg, 0.2 mmol, 1.0 equiv), and 9-mesityl-10-methylacridinium perchlorate **4** (1.0 mg, 0.0025 mmol, 0.0125 equiv) in DCE (2.0 mL) were employed to give the product **47** as inseparable diastereomers and other trace amount of uncharacterized isomeric products (combined 13.6 mg) in 25% yield, 1:1 dr, and >20:1 rr as colorless oil. In “stop-flow micro tubing” reactor: following the typical procedure **IV** using a HPFA tubing (total volume 1.5 mL) to afford product **47** as inseparable diastereomers and other trace amount of uncharacterized isomeric products (combined 30 mg) in 75% yield, 1:1 dr, and >20:1 rr.  $^1\text{H}$  NMR (400 MHz,  $\text{CDCl}_3$ )  $\delta$  7.46 – 7.33 (m, 4 $H_{\text{major}}$ ), 7.46 – 7.33 (m, 4 $H_{\text{minor}}$ ),

7.15 – 7.10 (m, 1H<sub>major</sub>), 7.15 – 7.10 (m, 1H<sub>minor</sub>), 5.90 (d,  $J = 15.5$  Hz, 1H), 5.62 (dd,  $J = 15.7, 0.6$  Hz, 1H), 5.17 (dd,  $J = 15.5, 9.0$  Hz, 1H), 4.94 (dd,  $J = 15.7, 9.3$  Hz, 1H), 4.11 (d,  $J = 3.8$  Hz, 1H), 4.05 (d,  $J = 9.8$ , 1H), 3.17 (dd,  $J = 9.8, 5.7$  Hz, 1H), 2.90 – 2.75 (m, 3H), 1.07 (s, 9H), 1.02 (d,  $J = 6.8$  Hz, 3H), 0.96 (s, 9H), 0.87 (d,  $J = 6.1$  Hz, 3H); <sup>13</sup>C NMR (126 MHz, CDCl<sub>3</sub>) δ 145.9, 145.4, 136.0, 134.6, 129.2, 128.9, 128.7, 128.6, 128.4, 125.9, 123.5, 112.4, 112.2, 111.7, 51.9, 40.1, 38.9, 33.2, 33.1, 29.5, 29.4, 28.7, 27.2, 19.6, 19.4; HRMS–APCI [M + H]<sup>+</sup> Calcd for C<sub>18</sub>H<sub>23</sub>N<sub>2</sub> 267.1856, found 267.1852.

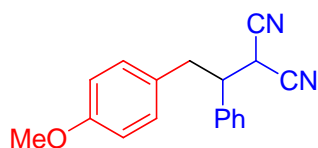

#### 2-(2-(4-Methoxyphenyl)-1-phenylethyl)malononitrile (**48**)

Following the typical procedure **V**, 4-Methylanisole (122 mg, 1.0 mmol, 5.0 equiv), 2-benzylidenemalononitrile (31 mg, 0.2 mmol, 1.0 equiv), and 9-mesityl-10-methylacridinium perchlorate **4** (1.0 mg, 0.0025 mmol, 0.0125 equiv) in DCE (2.0 mL) were employed to give the product **48** (47 mg) in 85% yield as a pale yellow oil. <sup>1</sup>H NMR (600 MHz, CDCl<sub>3</sub>) δ 7.46 – 7.35 (m, 5H), 7.10 (d,  $J = 8.6$  Hz, 2H), 6.86 (d,  $J = 8.6$  Hz, 2H), 3.86 (d,  $J = 5.2$  Hz, 1H), 3.79 (s, 3H), 3.44 – 3.39 (m, 1H), 3.25 – 3.17 (m, 2H); <sup>13</sup>C NMR (151 MHz, CDCl<sub>3</sub>) δ 158.9, 136.5, 129.9, 129.1, 128.9, 128.4, 127.9, 114.5, 112.1, 111.4, 55.2, 48.5, 37.6, 28.3; HRMS–ESI [M – H]<sup>−</sup> Calcd for C<sub>18</sub>H<sub>15</sub>N<sub>2</sub>O 275.1190, found 275.1193.

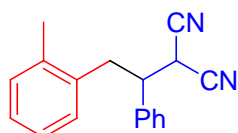

#### 2-(1-Phenyl-2-*o*-tolylethyl)malononitrile (**49**)

Following the typical procedure **V**, *o*-xylene (106 mg, 1.0 mmol, 5.0 equiv), 2-benzylidenemalononitrile (31 mg, 0.2 mmol, 1.0 equiv), and 9-mesityl-10-methylacridinium perchlorate **4** (1.0 mg, 0.0025 mmol, 0.0125 equiv) in DCE (2.0 mL) were employed to give the product **49** (42 mg) in 80% yield as a colorless oil. <sup>1</sup>H NMR (400 MHz, CDCl<sub>3</sub>) δ 7.47 – 7.35 (m, 5H), 7.22 – 7.18 (m, 2H), 7.18 – 7.11 (m, 1H), 7.08 (d,  $J = 7.1$  Hz, 1H), 3.92 (d,  $J = 5.0$  Hz, 1H), 3.43 (ddd,  $J = 8.8, 6.3, 5.1$  Hz, 1H), 3.33 (dd,  $J = 14.1, 8.8$  Hz, 1H), 3.23 (dd,  $J = 14.1, 6.4$  Hz, 1H), 2.33 (s, 3H); <sup>13</sup>C NMR (101 MHz, CDCl<sub>3</sub>) δ 136.7, 136.4, 134.8, 131.2, 129.6, 129.2, 129.1, 127.9, 127.7, 126.5, 112.1, 111.6, 46.9, 36.1, 28.5, 19.3; HRMS–APCI [M + H]<sup>+</sup> Calcd for

C<sub>18</sub>H<sub>17</sub>N<sub>2</sub> 261.1386, found 261.1387.

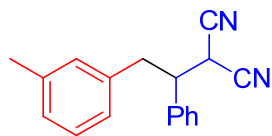

### 2-(1-Phenyl-2-*m*-tolylethyl)malononitrile (**50**)

Following the typical procedure **V**, *m*-xylene (106 mg, 1.0 mmol, 5.0 equiv), 2-benzylidenemalononitrile (31 mg, 0.2 mmol, 1.0 equiv), and 9-mesityl-10-methylacridinium perchlorate **4** (1.0 mg, 0.0025 mmol, 0.0125 equiv) in DCE (2.0 mL) were employed to give the product **50** (26 mg) in 50% yield as a colorless oil. <sup>1</sup>H NMR (300 MHz, CDCl<sub>3</sub>) δ 7.47 – 7.37 (m, 5H), 7.23 (t, *J* = 7.5 Hz, 1H), 7.10 (d, *J* = 7.7 Hz, 1H), 7.00 (d, *J* = 9.0 Hz, 2H), 3.85 (d, *J* = 4.9 Hz, 1H), 3.45 (td, *J* = 7.8, 4.9 Hz, 1H), 3.22 (d, *J* = 7.9 Hz, 2H), 2.34 (s, 3H); <sup>13</sup>C NMR (75 MHz, CDCl<sub>3</sub>) δ 138.9, 136.6, 129.6, 129.2, 129.0, 128.4, 128.0, 125.9, 112.1, 111.4, 48.3, 38.4, 28.4, 21.4; HRMS–APCI [M + H]<sup>+</sup> Calcd for C<sub>18</sub>H<sub>17</sub>N<sub>2</sub> 261.1386, found 261.1383.

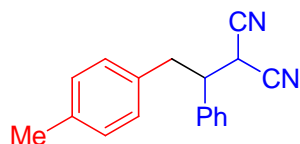

### 2-(1-Phenyl-2-*p*-tolylethyl)malononitrile (**51**)

Following the typical procedure **V**, *p*-xylene (106 mg, 1.0 mmol, 5.0 equiv), 2-benzylidenemalononitrile (31 mg, 0.2 mmol, 1.0 equiv), and 9-mesityl-10-methylacridinium perchlorate **4** (1.0 mg, 0.0025 mmol, 0.0125 equiv) in DCE (2.0 mL) were employed to give the product **51** (47 mg) in 89% yield as a colorless oil. <sup>1</sup>H NMR (400 MHz, CDCl<sub>3</sub>) δ 7.48 – 7.35 (m, 5H), 7.14 (d, *J* = 7.9 Hz, 2H), 7.09 (d, *J* = 8.1 Hz, 2H), 3.85 (d, *J* = 5.0 Hz, 1H), 3.48 – 3.38 (m, 1H), 3.23 (d, *J* = 8.0 Hz, 2H), 2.34 (s, 3H); <sup>13</sup>C NMR (101 MHz, CDCl<sub>3</sub>) δ 137.3, 136.5, 133.5, 129.8, 129.1, 129.0, 128.8, 128.0, 112.1, 111.4, 48.4, 38.1, 28.4, 21.0; HRMS–APCI [M + H]<sup>+</sup> Calcd for C<sub>18</sub>H<sub>17</sub>N<sub>2</sub> 261.1386, found 261.1385.

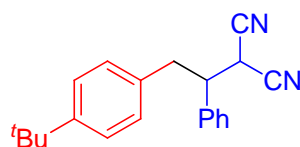

### 2-(2-(4-*Tert*-butylphenyl)-1-phenylethyl)malononitrile (**52**)

Following the typical procedure **V**, 1-*tert*-butyl-4-methylbenzene (148 mg, 1.0 mmol, 5.0 equiv), 2-benzylidenemalononitrile (31 mg, 0.2 mmol, 1.0 equiv), and 9-mesityl-10-methylacridinium perchlorate **4** (1.0 mg, 0.0025 mmol, 0.0125 equiv) in DCE (2.0 mL) were employed to give the

product **52** (50 mg) in 83% yield as a colorless oil.  $^1\text{H}$  NMR (400 MHz,  $\text{CDCl}_3$ )  $\delta$  7.46 – 7.40 (m, 5H), 7.37 (d,  $J$  = 8.4 Hz, 2H), 7.15 (d,  $J$  = 8.4 Hz, 2H), 3.86 (d,  $J$  = 4.8 Hz, 1H), 3.48 – 3.40 (m, 1H), 3.23 (d,  $J$  = 7.9 Hz, 2H), 1.32 (s, 9H);  $^{13}\text{C}$  NMR (101 MHz,  $\text{CDCl}_3$ )  $\delta$  150.7, 136.6, 133.5, 129.2, 129.0, 128.6, 128.1, 126.1, 112.2, 111.4, 48.3, 37.9, 34.5, 31.3, 28.4; HRMS–APCI  $[\text{M} + \text{H}]^+$  Calcd for  $\text{C}_{21}\text{H}_{23}\text{N}_2$  303.1856, found 303.1862.

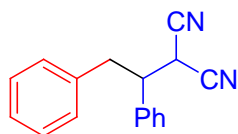

### 2-(1,2-Diphenylethyl)malononitrile (**53**)

Following the typical procedure **V**, toluene (92 mg, 1.0 mmol, 5.0 equiv), 2-benzylidenemalononitrile (31 mg, 0.2 mmol, 1.0 equiv), and 9-mesityl-10-methylacridinium perchlorate **4** (1.0 mg, 0.0025 mmol, 0.0125 equiv) in DCE (2.0 mL) were employed to give the product **53** (22.7 mg) in 46% yield as a colorless oil. In “stop-flow micro tubing” reactor: following the typical procedure **VI** using a HPFA tubing (total volume 1.5 mL) to afford product **53** (31.5 mg) in 85% yield.  $^1\text{H}$  NMR (300 MHz,  $\text{CDCl}_3$ )  $\delta$  7.51 – 7.41 (m, 5H), 7.41 – 7.31 (m, 3H), 7.28 – 7.20 (m, 2H), 3.89 (d,  $J$  = 5.0 Hz, 1H), 3.50 (td,  $J$  = 7.8, 5.1 Hz, 1H), 3.36 – 3.27 (m, 2H);  $^{13}\text{C}$  NMR (101 MHz,  $\text{CDCl}_3$ )  $\delta$  136.6, 136.4, 129.2, 129.1, 129.0, 128.9, 128.0, 127.6, 112.0, 111.4, 48.3, 38.5, 28.5; HRMS–APCI  $[\text{M} + \text{H}]^+$  Calcd for  $\text{C}_{17}\text{H}_{15}\text{N}_2$  247.1230, found 247.1226.

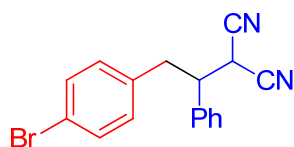

### 2-(2-(4-Bromophenyl)-1-phenylethyl)malononitrile (**54**)

Following the typical procedure **V**, 1-bromo-4-methylbenzene (171 mg, 1.0 mmol, 5.0 equiv), 2-benzylidenemalononitrile (31 mg, 0.2 mmol, 1.0 equiv), and 9-mesityl-10-methylacridinium perchlorate **4** (1.0 mg, 0.0025 mmol, 0.0125 equiv) in DCE (2.0 mL) were employed to give the product **54** (8 mg) in 12% yield as a colorless oil. In “stop-flow micro tubing” reactor: following the typical procedure **VI** using a HPFA tubing (total volume 1.5 mL) to afford product **54** (31 mg) in 64% yield.  $^1\text{H}$  NMR (400 MHz,  $\text{CDCl}_3$ )  $\delta$  7.46 – 7.37 (m, 5H), 7.36 – 7.31 (m, 2H), 7.02 (d,  $J$  = 8.4 Hz, 2H), 3.86 (d,  $J$  = 5.5 Hz, 1H), 3.43 (td,  $J$  = 7.8, 5.5 Hz, 1H), 3.24 (qd,  $J$  = 14.1, 7.8 Hz, 2H);  $^{13}\text{C}$  NMR (75 MHz,  $\text{CDCl}_3$ )  $\delta$  135.9, 135.5, 132.2, 130.6, 129.3, 129.2, 127.9, 121.5, 111.8, 111.4, 48.2, 37.9, 28.8; HRMS–APCI  $[\text{M} + \text{H}]^+$  Calcd for  $\text{C}_{17}\text{H}_{14}\text{BrN}_2$  325.0335, found 325.0327.

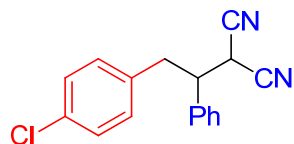

### 2-(2-(4-Chlorophenyl)-1-phenylethyl)malononitrile (**55**)

Following the typical procedure **V**, 1-chloro-4-methylbenzene (127 mg, 1.0 mmol, 5.0 equiv), 2-benzylidenemalononitrile (31 mg, 0.2 mmol, 1.0 equiv), and 9-mesityl-10-methylacridinium perchlorate **4** (1.0 mg, 0.0025 mmol, 0.0125 equiv) in DCE (2.0 mL) were employed to give the product **55** (6 mg) in 10% yield as a colorless oil. In “stop-flow micro tubing” reactor: following the typical procedure **VI** using a HPFA tubing (total volume 1.5 mL) to afford product **55** (15.5 mg) in 37% yield.  $^1\text{H}$  NMR (300 MHz,  $\text{CDCl}_3$ )  $\delta$  7.45 – 7.31 (m, 5H), 7.27 (d,  $J = 7.5$  Hz, 2H), 7.08 (d,  $J = 7.6$  Hz, 2H), 3.87 (d,  $J = 5.1$  Hz, 1H), 3.44 (dd,  $J = 13.8, 7.1$  Hz, 1H), 3.35 – 3.14 (m, 2H);  $^{13}\text{C}$  NMR (75 MHz,  $\text{CDCl}_3$ )  $\delta$  135.9, 135.0, 133.4, 130.3, 129.3, 129.2, 127.9, 111.8, 111.4, 48.2, 37.9, 28.8; HRMS–APCI  $[\text{M} + \text{H}]^+$  Calcd for  $\text{C}_{17}\text{H}_{14}\text{ClN}_2$  281.0840, found 281.0837.

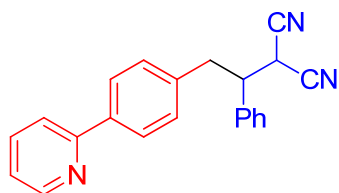

### 2-(1-Phenyl-2-(4-(pyridin-2-yl)phenyl)ethyl)malononitrile (**56**)

Following the typical procedure **V**, 2-(*p*-tolyl)pyridine (169 mg, 1.0 mmol, 5.0 equiv), 2-benzylidenemalononitrile (31 mg, 0.2 mmol, 1.0 equiv), and 9-mesityl-10-methylacridinium perchlorate **4** (1.0 mg, 0.0025 mmol, 0.0125 equiv) in DCE (2.0 mL) were employed to give the product **56** (47 mg) in 73% yield as a pale yellow oil.  $^1\text{H}$  NMR (500 MHz,  $\text{CDCl}_3$ )  $\delta$  8.70 (d,  $J = 4.8$  Hz, 1H), 7.96 (d,  $J = 8.2$  Hz, 2H), 7.76 (td,  $J = 7.8, 1.7$  Hz, 1H), 7.71 (d,  $J = 7.9$  Hz, 1H), 7.47 – 7.35 (m, 5H), 7.28 (d,  $J = 8.2$  Hz, 2H), 7.25 (ddd,  $J = 7.0, 4.8, 0.9$  Hz, 1H), 3.98 (d,  $J = 5.5$  Hz, 1H), 3.53 (td,  $J = 7.8, 5.6$  Hz, 1H), 3.33 (ddd,  $J = 28.9, 14.0, 7.9$  Hz, 2H);  $^{13}\text{C}$  NMR (126 MHz,  $\text{CDCl}_3$ )  $\delta$  156.5, 149.5, 138.4, 137.3, 136.8, 136.1, 129.2, 129.0, 128.9, 127.9, 127.4, 122.2, 120.3, 111.9, 111.5, 47.9, 38.1, 28.5; HRMS–ESI  $[\text{M} + \text{Na}]^+$  Calcd for  $\text{C}_{22}\text{H}_{17}\text{N}_3\text{Na}$  346.1315, found 346.1315.

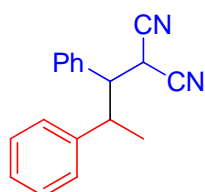



### 2-(1,2-Diphenylpropyl)malononitrile (**57**)

Following the typical procedure **V**, ethylbenzene (106 mg, 1.0 mmol, 5.0 equiv), 2-benzylidenemalononitrile (31 mg, 0.2 mmol, 1.0 equiv), and 9-mesityl-10-methylacridinium perchlorate **4** (1.0 mg, 0.0025 mmol, 0.0125 equiv) in DCE (2.0 mL) were employed to give the product **57** as two separable diastereomers (combined 38 mg) in 73% yield and 1.2:1 dr as colorless oil. Data for the major diastereomer:  $^1\text{H}$  NMR (500 MHz,  $\text{CDCl}_3$ )  $\delta$  7.56 – 7.41 (m, 7H), 7.41 – 7.33 (m, 3H), 3.61 (d,  $J = 4.1$  Hz, 1H), 3.41 (dq,  $J = 13.5, 6.8$  Hz, 1H), 3.21 (dd,  $J = 11.6, 4.0$  Hz, 1H), 1.15 (d,  $J = 6.8$  Hz, 3H);  $^{13}\text{C}$  NMR (126 MHz,  $\text{CDCl}_3$ )  $\delta$  142.4, 135.5, 129.7, 129.3, 129.1, 128.5, 128.1, 127.1, 112.1, 111.4, 53.6, 42.0, 28.7, 20.6; HRMS–APCI  $[\text{M} + \text{H}]^+$  Calcd for  $\text{C}_{18}\text{H}_{17}\text{N}_2$  261.1386, found 261.1388.

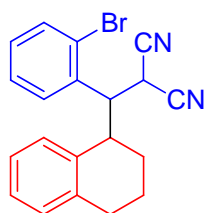

### 2-((2-Bromophenyl)(1,2,3,4-tetrahydronaphthalen-1-yl)methyl)malononitrile (**58**)

Following the typical procedure **V**, 1,2,3,4-tetrahydronaphthalene (53 mg, 0.4 mmol, 2.0 equiv), 2-(2-bromobenzylidene)malononitrile (47 mg, 0.2 mmol, 1.0 equiv), and 9-mesityl-10-methylacridinium perchlorate **4** (1.0 mg, 0.0025 mmol, 0.0125 equiv) in DCE (2.0 mL) were employed to give the product **58** as two separable diastereomers (combined 55 mg) in 75% yield and 2:1 dr as colorless oil. The major diastereomer:  $^1\text{H}$  NMR (300 MHz,  $\text{CDCl}_3$ )  $\delta$  7.59 – 7.45 (m, 2H), 7.38 (t,  $J = 7.5$  Hz, 1H), 7.20 (ddd,  $J = 8.2, 7.4, 1.1$  Hz, 1H), 7.16 – 7.04 (m, 2H), 6.91 (t,  $J = 7.3$  Hz, 1H), 6.57 (d,  $J = 7.8$  Hz, 1H), 4.46 – 4.34 (m, 1H), 4.20 (d,  $J = 6.7$  Hz, 1H), 3.60 – 3.45 (m, 1H), 2.81 (t,  $J = 6.8$  Hz, 2H), 2.16 – 1.93 (m, 2H), 1.92 – 1.74 (m, 2H);  $^{13}\text{C}$  NMR (75 MHz,  $\text{CDCl}_3$ )  $\delta$  137.9, 136.4, 134.9, 133.5, 129.9, 129.5, 128.6, 128.2, 128.0, 127.1, 126.5, 125.4, 112.2, 111.6, 46.9, 40.6, 28.3, 25.9, 25.3, 18.9; the minor diastereomer:  $^1\text{H}$  NMR (300 MHz,  $\text{CDCl}_3$ )  $\delta$  7.73 (dd,  $J = 11.5, 8.0$  Hz, 2H), 7.50 (t,  $J = 7.5$  Hz, 1H), 7.39 – 7.18 (m, 5H), 4.07 (dd,  $J = 11.6, 4.1$  Hz, 1H), 3.97 (d,  $J = 4.1$  Hz, 1H), 3.44 (d,  $J = 11.7$  Hz, 1H), 3.02 (ddd,  $J = 17.7, 8.5, 3.5$  Hz, 1H), 2.93 – 2.76 (m, 1H), 2.06 – 1.86 (m, 1H), 1.80 – 1.46 (m, 3H);  $^{13}\text{C}$  NMR (75 MHz,  $\text{CDCl}_3$ )  $\delta$  137.5, 136.3, 135.3, 133.9, 130.5, 130.3, 128.9, 128.6, 128.5, 128.1, 126.5, 126.1, 112.1, 111.4, 46.8, 40.7, 28.0, 27.0, 24.9, 17.3; HRMS–APCI  $[\text{M} + \text{H}]^+$  Calcd for  $\text{C}_{20}\text{H}_{18}\text{BrN}_2$  365.0648,

found 365.0645.

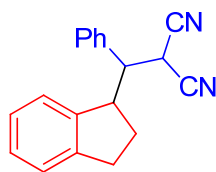

### 2-((2,3-Dihydro-1H-inden-1-yl)(phenyl)methyl)malononitrile (**59**)

Following the typical procedure **V**, 2,3-dihydro-1*H*-indene (118 mg, 1.0 mmol, 5.0 equiv), 2-benzylidenemalononitrile (31 mg, 0.2 mmol, 1.0 equiv), and 9-mesityl-10-methylacridinium perchlorate **4** (1.0 mg, 0.0025 mmol, 0.0125 equiv) in DCE (2.0 mL) were employed to give the product **59** as two separable diastereomers (combined 54 mg) in 99% yield and 2:1 dr as colorless oil. The major diastereomer:  $^1\text{H}$  NMR (400 MHz,  $\text{CDCl}_3$ )  $\delta$  7.45 – 7.33 (m, 3H), 7.23 – 7.12 (m, 4H), 7.05 – 6.95 (m, 1H), 6.57 (d,  $J = 7.6$  Hz, 1H), 4.20 (d,  $J = 6.9$  Hz, 1H), 3.96 (dd,  $J = 14.1, 8.0$  Hz, 1H), 3.36 (dd,  $J = 8.7, 6.9$  Hz, 1H), 2.83 – 2.71 (m, 1H), 2.56 – 2.42 (m, 2H), 2.00 – 1.86 (m, 1H);  $^{13}\text{C}$  NMR (101 MHz,  $\text{CDCl}_3$ )  $\delta$  144.8, 141.8, 135.9, 129.1, 129.0, 128.6, 127.7, 126.3, 124.9, 124.5, 112.1, 111.8, 51.1, 46.2, 31.3, 30.9, 28.4; the minor diastereomer:  $^1\text{H}$  NMR (400 MHz,  $\text{CDCl}_3$ )  $\delta$  7.48 – 7.38 (m, 6H), 7.33 – 7.26 (m, 3H), 4.18 (d,  $J = 4.7$  Hz, 1H), 3.80 (dd,  $J = 10.8, 7.8$  Hz, 1H), 3.06 (dd,  $J = 11.0, 4.7$  Hz, 1H), 2.99 – 2.86 (m, 1H), 2.78 (dd,  $J = 16.2, 8.1$  Hz, 1H), 2.25 – 2.11 (m, 1H), 1.82 – 1.71 (m, 1H);  $^{13}\text{C}$  NMR (75 MHz,  $\text{CDCl}_3$ )  $\delta$  144.5, 142.9, 136.3, 129.2, 128.9, 128.6, 128.3, 126.8, 125.8, 124.5, 112.1, 111.9, 49.3, 46.8, 30.5, 30.1, 28.4; HRMS–APCI  $[\text{M} + \text{H}]^+$  Calcd for  $\text{C}_{19}\text{H}_{17}\text{N}_2$  273.1386, found 273.1387.

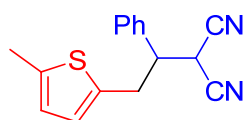

### 2-(2-(5-Methylthiophen-2-yl)-1-phenylethyl)malononitrile (**60**)

Following the typical procedure **V**, 2,5-dimethylthiophene (112 mg, 1.0 mmol, 5.0 equiv), 2-benzylidenemalononitrile (31 mg, 0.2 mmol, 1.0 equiv), and 9-mesityl-10-methylacridinium perchlorate **4** (1.0 mg, 0.0025 mmol, 0.0125 equiv) in DCE (2.0 mL) were employed to give the product **60** (28.2 mg) in 53% yield as a pale yellow oil. In “stop-flow micro tubing” reactor: following the typical procedure **IV** using a HPFA tubing (total volume 1.5 mL) to afford product **60** (24.4 mg) in 61% yield.  $^1\text{H}$  NMR (500 MHz,  $\text{CDCl}_3$ )  $\delta$  7.47 – 7.37 (m, 5H), 6.69 (d,  $J = 3.3$  Hz, 1H), 6.58 (dd,  $J = 3.2, 0.9$  Hz, 1H), 4.01 (d,  $J = 4.7$  Hz, 1H), 3.49 – 3.40 (m, 2H), 3.40 – 3.31 (m, 1H), 2.44 (s, 3H);  $^{13}\text{C}$  NMR (126 MHz,  $\text{CDCl}_3$ )  $\delta$  140.0, 136.1, 135.9, 129.2, 129.1, 128.0, 127.0,

125.3, 111.9, 111.2, 48.4, 32.9, 28.4, 15.3; HRMS–APCI  $[M + H]^+$  Calcd for  $C_{16}H_{15}N_2S$  267.0950, found 267.0954.

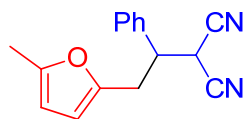

### 2-(2-(5-Methylfuran-2-yl)-1-phenylethyl)malononitrile (**61**)

Following the typical procedure **VI** using a HPFA tubing (total volume 1.5 mL) to afford product **61** (29 mg) in 77% yield as a pale yellow oil.  $^1H$  NMR (500 MHz,  $CDCl_3$ )  $\delta$  7.47 – 7.36 (m, 5H), 6.05 (d,  $J = 2.9$  Hz, 1H), 5.92 – 5.85 (m, 1H), 4.00 (d,  $J = 4.9$  Hz, 1H), 3.61 (dt,  $J = 10.2, 5.2$  Hz, 1H), 3.28 (dd,  $J = 15.3, 10.0$  Hz, 1H), 3.19 (dd,  $J = 15.3, 5.5$  Hz, 1H), 2.28 (s, 3H);  $^{13}C$  NMR (126 MHz,  $CDCl_3$ )  $\delta$  142.4, 135.5, 129.7, 129.3, 129.1, 128.5, 128.1, 127.1, 112.1, 111.4, 53.6, 42.0, 28.7, 20.6; HRMS–APCI  $[M + H]^+$  Calcd for  $C_{16}H_{15}N_2O$  251.1179, found 251.1184.

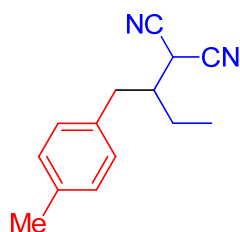

### 2-(1-*p*-Tolylbutan-2-yl)malononitrile (**62**)

Following the typical procedure **V**, *p*-xylene (106 mg, 1.0 mmol, 5.0 equiv), 2-propylidenemalononitrile (21 mg, 0.2 mmol, 1.0 equiv), and 9-mesityl-10-methylacridinium perchlorate **4** (1.0 mg, 0.0025 mmol, 0.0125 equiv) in DCE (2.0 mL) were employed to give the product **62** (33 mg) in 78% yield as a colorless oil.  $^1H$  NMR (400 MHz,  $CDCl_3$ )  $\delta$  7.16 (d,  $J = 7.9$  Hz, 2H), 7.07 (d,  $J = 8.0$  Hz, 2H), 3.61 (d,  $J = 4.1$  Hz, 1H), 3.00 (dd,  $J = 14.2, 5.7$  Hz, 1H), 2.60 (dd,  $J = 14.2, 9.5$  Hz, 1H), 2.35 (s, 3H), 2.23 – 2.10 (m, 1H), 1.91 – 1.77 (m, 1H), 1.74 – 1.59 (m, 1H), 1.12 (t,  $J = 7.4$  Hz, 3H);  $^{13}C$  NMR (126 MHz,  $CDCl_3$ )  $\delta$  137.1, 133.8, 129.8, 128.7, 112.6, 111.5, 44.4, 36.6, 26.3, 24.3, 21.0, 11.3; HRMS–APCI  $[M + H]^+$  Calcd for  $C_{14}H_{17}N_2$  213.1386, found 213.1384.

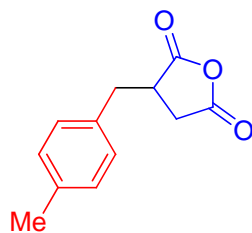

### 3-(4-Methylbenzyl)dihydrofuran-2,5-dione (**63**)

Following the typical procedure **V**, *p*-xylene (106 mg, 1.0 mmol, 5.0 equiv),

cyclopent-4-ene-1,3-dione (19.2 mg, 0.2 mmol, 1.0 equiv), and 9-mesityl-10-methylacridinium perchlorate **4** (1.0 mg, 0.0025 mmol, 0.0125 equiv) in DCE (2.0 mL) were employed to give the product **63** (30 mg) in 74% yield as a pale yellow oil. <sup>1</sup>H NMR (300 MHz, CDCl<sub>3</sub>) δ 7.12 (d, *J* = 7.7 Hz, 2H), 7.06 (d, *J* = 7.6 Hz, 2H), 3.21 – 3.00 (m, 2H), 2.79 – 2.54 (m, 2H), 2.42 (d, *J* = 17.0 Hz, 1H), 2.32 (s, 3H); <sup>13</sup>C NMR (75 MHz, CDCl<sub>3</sub>) δ 180.7, 178.5, 136.5, 134.5, 129.4, 128.8, 42.9, 36.9, 34.5, 21.0; HRMS–APCI [M + H]<sup>+</sup> Calcd for C<sub>12</sub>H<sub>13</sub>O<sub>3</sub> 205.0859, found 205.0864.

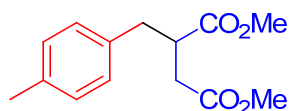

#### Dimethyl 2-(4-methylbenzyl)succinate (**64**)

Following the typical procedure **V**, *p*-xylene (106 mg, 1.0 mmol, 5.0 equiv), dimethyl maleate (29 mg, 0.2 mmol, 1.0 equiv), and 9-mesityl-10-methylacridinium perchlorate **4** (1.0 mg, 0.0025 mmol, 0.0125 equiv) in DCE (2.0 mL) were employed to give the product **64** (34.5 mg) in 69% yield as a pale yellow oil. <sup>1</sup>H NMR (300 MHz, CDCl<sub>3</sub>) δ 7.09 (d, *J* = 8.0 Hz, 2H), 7.03 (d, *J* = 8.1 Hz, 2H), 3.67 (s, 3H), 3.63 (s, 3H), 3.17 – 2.94 (m, 2H), 2.78 – 2.58 (m, 2H), 2.43 (d, *J* = 4.8 Hz, 1H), 2.31 (s, 3H); <sup>13</sup>C NMR (75 MHz, CDCl<sub>3</sub>) δ 174.7, 172.3, 136.2, 135.0, 129.2, 128.9, 51.8, 51.7, 43.1, 37.3, 34.9, 20.9; HRMS–ESI [M + Na]<sup>+</sup> Calcd for C<sub>14</sub>H<sub>18</sub>NaO<sub>4</sub> 273.1097, found 273.1102.

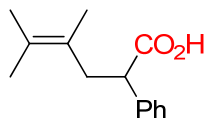

#### 4,5-Dimethyl-2-phenylhex-4-enoic acid (**66**)

In a Schlenk tube equipped with a magnetic stirring bar was charged with alkylation product **7** (238 mg, 1.0 mmol, 1.0 equiv), CuI (38 mg, 0.2 mmol, 0.2 equiv), and Cs<sub>2</sub>CO<sub>3</sub> (652 mg, 2.0 mmol, 2.0 equiv) in DMSO (2.0 mL), and the resulting mixture was performed in air at 140 °C for 18 h. After the reaction was cooled to room temperature, ethyl acetate 5 mL was added and the solution was filtrated. Then HCl (1 M) was added to adjusted the pH to 2~3. The solution was extracted with ethyl acetate (3×5 mL). The combined organic phase was washed with water and brine, dried over anhydrous Na<sub>2</sub>SO<sub>4</sub>, and purified using column chromatography isolation on silica gel by gradient elution with hexane / ethyl acetate (10:1~2:1) to give the acid **66** (157 mg) as a pale yellow oil in 72% yield. <sup>1</sup>H NMR (300 MHz, CDCl<sub>3</sub>) δ 7.39 – 7.22 (m, 5H), 3.72 (t, *J* = 7.6 Hz, 1H), 2.89 (dd, *J* = 13.6, 7.9 Hz, 1H), 2.50 (dd, *J* = 13.6, 7.4 Hz, 1H), 1.59 (s, 6H), 1.55 (s, 3H);

$^{13}\text{C}$  NMR (75 MHz,  $\text{CDCl}_3$ )  $\delta$  180.3, 138.5, 128.4, 128.1, 127.5, 127.3, 123.9, 50.4, 38.4, 20.6, 20.3, 18.4; HRMS–ESI  $[\text{M} - \text{H}]^-$  Calcd for  $\text{C}_{14}\text{H}_{17}\text{O}_2$  217.1234, found 217.1237.

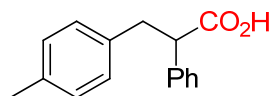

### 2-Phenyl-3-(*p*-tolyl)propanoic acid (**67**)

In a Schlenk tube equipped with a magnetic stirring bar was charged with alkylation product **51** (260 mg, 1.0 mmol, 1.0 equiv), CuI (38 mg, 0.2 mmol, 0.2 equiv), and  $\text{Cs}_2\text{CO}_3$  (652 mg, 2.0 mmol, 2.0 equiv) in DMSO (2.0 mL), and the resulting mixture was performed in air at  $140^\circ\text{C}$  for 18 h. After the reaction was cooled to room temperature, ethyl acetate 5 mL was added and the solution was filtrated. Then HCl (1 M) was added to adjusted the pH to 2~3. The solution was extracted with ethyl acetate ( $3 \times 5$  mL). The combined organic phase was washed with water and brine, dried over anhydrous  $\text{Na}_2\text{SO}_4$ , and purified using column chromatography isolation on silica gel by gradient elution with hexane / ethyl acetate (10:1~2:1) to give the acid **67** (180 mg) as a pale red solid in 75% yield.  $^1\text{H}$  NMR (400 MHz,  $\text{CDCl}_3$ )  $\delta$  7.37 – 7.25 (m, 5H), 7.03 (q,  $J = 8.2$  Hz, 4H), 3.85 (dd,  $J = 8.4, 7.0$  Hz, 1H), 3.38 (dd,  $J = 13.9, 8.5$  Hz, 1H), 3.01 (dd,  $J = 13.9, 6.9$  Hz, 1H), 2.30 (s, 3H);  $^{13}\text{C}$  NMR (101 MHz,  $\text{CDCl}_3$ )  $\delta$  179.3, 138.0, 135.9, 135.6, 129.0, 128.7, 128.6, 128.1, 127.5, 53.5, 38.8, 20.9; HRMS–ESI  $[\text{M} + \text{Na}]^+$  Calcd for  $\text{C}_{16}\text{H}_{16}\text{NaO}_2$  263.1043, found 263.1046.

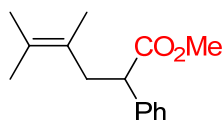

### Methyl 4,5-dimethyl-2-phenylhex-4-enoate (**68**)

At  $-20^\circ\text{C}$ , MCPBA (78 mg, 0.45 mmol, 1.5 equiv) was added to a mixture of alkylation product **7** (72 mg, 0.3 mmol, 1.0 equiv) and  $\text{Cs}_2\text{CO}_3$  (103 mg, 0.315 mmol, 1.05 equiv) in MeOH (2.0 mL). After 12 hrs, the reaction was warmed to room temperature and stirred for another 12 hrs. The mixture was filtered through a short column of  $\text{SiO}_2$ , and purified using column chromatography isolation on silica gel by gradient elution with hexane / ethyl acetate (50:1~30:1) to give the acid **68** (48 mg) as a colorless oil in 69% yield.  $^1\text{H}$  NMR (500 MHz,  $\text{CDCl}_3$ )  $\delta$  7.36 – 7.30 (m, 4H), 7.30 – 7.25 (m, 1H), 3.73 (t,  $J = 7.7$  Hz, 1H), 3.67 (s, 3H), 2.87 (dd,  $J = 13.5, 8.0$  Hz, 1H), 2.52 (dd,  $J = 13.5, 7.4$  Hz, 1H), 1.61 (s, 6H), 1.56 (s, 3H);  $^{13}\text{C}$  NMR (126 MHz,  $\text{CDCl}_3$ )  $\delta$  174.4, 139.2, 128.4, 127.9, 127.3, 127.1, 124.1, 51.8, 50.4, 38.8, 20.6, 20.2, 18.4; HRMS–ESI  $[\text{M} + \text{Na}]^+$  Calcd for  $\text{C}_{15}\text{H}_{20}\text{NaO}_2$  255.1356, found 255.1354.

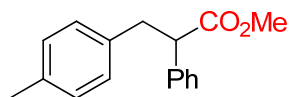

**Methyl 2-phenyl-3-(*p*-tolyl)propanoate (69)**

At  $-20\text{ }^{\circ}\text{C}$ , MCPBA (78 mg, 0.45 mmol, 1.5 equiv) was added to a mixture of alkylation product **51** (78 mg, 0.3 mmol, 1.0 equiv) and  $\text{Cs}_2\text{CO}_3$  (103 mg, 0.315 mmol, 1.05 equiv) in MeOH (2.0 mL). After 12 hrs, the reaction was warmed to room temperature and stirred for another 12 hrs. The mixture was filtered through a short column of  $\text{SiO}_2$ , and purified using column chromatography isolation on silica gel by gradient elution with hexane / ethyl acetate (50:1~30:1) to give the acid **69** (62.5 mg) as a colorless oil in 82% yield.  $^1\text{H}$  NMR (500 MHz,  $\text{CDCl}_3$ )  $\delta$  7.34 (d,  $J = 4.3$  Hz, 4H), 7.31 – 7.26 (m, 1H), 7.07 (d,  $J = 8.1$  Hz, 2H), 7.04 (d,  $J = 8.1$  Hz, 2H), 3.86 (dd,  $J = 8.9, 6.6$  Hz, 1H), 3.63 (s, 3H), 3.41 (dd,  $J = 13.8, 8.9$  Hz, 1H), 3.02 (dd,  $J = 13.8, 6.6$  Hz, 1H), 2.32 (s, 3H);  $^{13}\text{C}$  NMR (126 MHz,  $\text{CDCl}_3$ )  $\delta$  173.9, 138.8, 135.9, 135.8, 129.0, 128.7, 128.6, 127.9, 127.3, 53.7, 51.9, 39.4, 21.0; HRMS–ESI  $[\text{M} + \text{Na}]^+$  Calcd for  $\text{C}_{17}\text{H}_{18}\text{NaO}_2$  277.1199, found 277.1203.

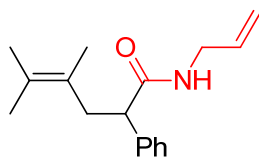

***N*-allyl-4,5-dimethyl-2-phenylhex-4-enamide (70)**

Under  $\text{O}_2$  atmosphere, allylamine (57 mg, 1.0 mmol, 2.0 equiv) was added to a solution of alkylation product **7** (119 mg, 0.5 mmol, 1.0 equiv) and  $\text{K}_2\text{CO}_3$  (138 mg, 1.0 mmol, 2.0 equiv) in  $\text{CH}_3\text{CN}$  (5.0 mL). The resulting mixture was stirred at rt until the compound **7** was completely consumed as monitored by TLC. The solution was filtered, then concentrated and purified using column chromatography isolation on silica gel by gradient elution with hexane / ethyl acetate (10:1~5:1) to give the amide **70** (114 mg) as a pale yellow semi-solid in 89% yield.  $^1\text{H}$  NMR (500 MHz,  $\text{CDCl}_3$ )  $\delta$  7.32 – 7.26 (m, 4H), 7.26 – 7.21 (m, 1H), 5.80 – 5.69 (m, 1H), 5.61 (br s, 1H), 5.09 – 4.98 (m, 2H), 3.90 – 3.82 (m, 1H), 3.81 – 3.73 (m, 1H), 3.46 (t,  $J = 7.5$  Hz, 1H), 2.88 (dd,  $J = 13.6, 6.9$  Hz, 1H), 2.56 (dd,  $J = 13.6, 8.1$  Hz, 1H), 1.56 (s, 6H), 1.50 (s, 3H);  $^{13}\text{C}$  NMR (126 MHz,  $\text{CDCl}_3$ )  $\delta$  173.2, 140.1, 134.2, 128.4, 128.1, 127.0, 126.8, 124.7, 115.9, 52.1, 41.9, 38.3, 20.6, 20.3, 18.4; HRMS–ESI  $[\text{M} + \text{Na}]^+$  Calcd for  $\text{C}_{17}\text{H}_{23}\text{NNaO}$  280.1672, found 280.1667.

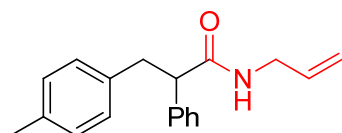

### ***N*-allyl-2-phenyl-3-(*p*-tolyl)propanamide (71)**

Under O<sub>2</sub> atmosphere, allylamine (57 mg, 1.0 mmol, 2.0 equiv) was added to a solution of alkylation product **51** (130 mg, 0.5 mmol, 1.0 equiv) and K<sub>2</sub>CO<sub>3</sub> (138 mg, 1.0 mmol, 2.0 equiv) in CH<sub>3</sub>CN (5.0 mL). The resulting mixture was stirred at rt until the compound **51** was completely consumed as monitored by TLC. The solution was filtered, then concentrated and purified using column chromatography isolation on silica gel by gradient elution with hexane / ethyl acetate (10:1~5:1) to give the amide **71** (112 mg) as a colorless oil in 80% yield. <sup>1</sup>H NMR (500 MHz, CDCl<sub>3</sub>) δ 7.35 – 7.27 (m, 4H), 7.27 – 7.22 (m, 1H), 7.06 – 6.98 (m, 4H), 5.72 – 5.60 (m, 2H), 4.98 (d, *J* = 10.3 Hz, 1H), 4.89 (d, *J* = 17.2 Hz, 1H), 3.85 – 3.68 (m, 2H), 3.60 (t, *J* = 7.4 Hz, 1H), 3.51 (dd, *J* = 13.5, 8.1 Hz, 1H), 2.97 (dd, *J* = 13.5, 6.8 Hz, 1H), 2.28 (s, 3H); <sup>13</sup>C NMR (126 MHz, CDCl<sub>3</sub>) δ 172.6, 139.7, 136.5, 135.5, 133.9, 128.9, 128.8, 128.6, 127.9, 127.2, 115.8, 55.59, 41.8, 39.2, 20.9; HRMS–ESI [M + Na]<sup>+</sup> Calcd for C<sub>19</sub>H<sub>21</sub>NNaO 302.1515, found 302.1518.

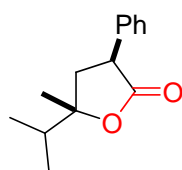

### **5-Isopropyl-5-methyl-3-phenyldihydrofuran-2(3*H*)-one (72)**

To a 25 mL Schlenk tube equipped with a magnetic stir bar was added the 4,5-dimethyl-2-phenylhex-4-enoic acid (**66**) (44 mg, 0.2 mmol, 1.0 equiv.), 2-phenylmalononitrile (14.2 mg, 0.1 mmol, 0.5 equiv), and 9-mesityl-10-methylacridinium perchlorate **4** (4.1 mg, 0.01 mmol, 0.05 equiv.). The resulting mixture was sealed and degassed via vacuum evacuation and subsequent backfill with argon for three times. Then anhydrous DCE (0.2 mL) was added, and finally 2,6-lutidine (2.1 mg, 0.02 mmol, 0.1 equiv.) was added. After that, the reaction was placed under a blue LED with an argon balloon and irradiated for 72 hrs. The solvent was removed on a rotary evaporator under reduced pressure and the residue was subjected to column chromatography isolation on silica gel by gradient elution with hexane / ethyl acetate (15:1-10:1) to give the lactone **72** (30.5 mg) as a colorless oil in 70% yield and 10:1 dr. The overall yield of lactone **72** starting from alkylation product **7** is thus calculated as 50%.

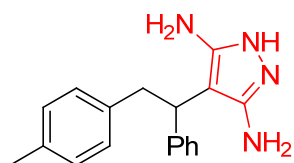

#### 4-(1-Phenyl-2-(*p*-tolyl)ethyl)-1H-pyrazole-3,5-diamine (**73**)

The alkylation product **51** (260 mg, 1.0 mmol, 1.0 equiv) was dissolved in hydrazine hydrate (300 mg, 6.0 mmol, 6.0 equiv). The mixture was heated under reflux for 1.5 h, and then cooled to room temperature. Ethanol was added and the precipitated was collected. Recrystallization from ethyl acetate and hexane gave the pyrazole **73** (240 mg) as a gray solid in 82% yield. <sup>1</sup>H NMR (500 MHz, CDCl<sub>3</sub>) δ 7.37 – 7.27 (m, 4H), 7.21 (t, *J* = 7.0 Hz, 1H), 7.00 (d, *J* = 7.8 Hz, 2H), 6.95 (d, *J* = 7.9 Hz, 2H), 4.37 (br s, 2H), 3.92 (dd, *J* = 10.5, 5.0 Hz, 1H), 3.33 (dd, *J* = 12.7, 5.0 Hz, 1H), 3.09 (dd, *J* = 12.5, 10.8 Hz, 1H), 2.28 (s, 3H); <sup>13</sup>C NMR (126 MHz, CDCl<sub>3</sub>) δ 148.8, 143.3, 137.6, 135.5, 129.0, 128.9, 128.5, 127.6, 126.3, 92.9, 41.6, 38.9, 20.9; HRMS–ESI [*M* + Na]<sup>+</sup> Calcd for C<sub>18</sub>H<sub>20</sub>N<sub>4</sub>Na 315.1580, found 315.1588.

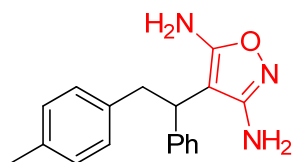

#### 4-(1-Phenyl-2-(*p*-tolyl)ethyl)isoxazole-3,5-diamine (**74**)

To a stirred mixture of hydroxylamine hydrochloride (35 mg, 0.5 mmol, 1.0 equiv) and alkylation product **51** (130 mg, 0.5 mmol, 1.0 equiv) in methanol (3.0 mL), a solution of triethylamine (70 μL, 0.5 mmol, 1.0 equiv) in methanol (1.0 mL) was added dropwise. After the addition has been completed, a second portion of triethylamine (70 μL, 0.5 mmol, 1.0 equiv) was added and the mixture was stirred at room temperature for 48 hrs. The solvent was removed on a rotary evaporator under reduced pressure and the residue was subjected to column chromatography isolation on silica gel by gradient elution with hexane / ethyl acetate (5:1-1:1) to give the isoxazole **74** (86 mg) as a gray solid in 59% yield. <sup>1</sup>H NMR (300 MHz, CDCl<sub>3</sub>) δ 7.37 (d, *J* = 4.3 Hz, 4H), 7.32 – 7.27 (m, 1H), 7.10 (d, *J* = 7.9 Hz, 2H), 7.03 (d, *J* = 8.0 Hz, 2H), 3.86 (dd, *J* = 11.1, 4.6 Hz, 1H), 3.68 – 3.40 (br s, 2H), 3.35 (dd, *J* = 12.7, 4.6 Hz, 1H), 3.14 – 3.03 (m, 1H), 2.32 (s, 3H); <sup>13</sup>C NMR (101 MHz, CDCl<sub>3</sub>) δ 164.4, 141.7, 136.9, 136.1, 129.4, 129.1, 128.8, 127.6, 127.0, 86.9, 40.9, 38.6, 21.0.



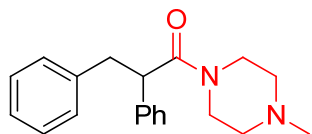

### 1-(4-Methylpiperazin-1-yl)-2,3-diphenylpropan-1-one (75)

Under O<sub>2</sub> atmosphere, 1-methylpiperazine (39 mg, 0.39 mmol, 2.0 equiv) was added to a solution of alkylation product **53** (47.5 mg, 0.19 mmol, 1.0 equiv) and K<sub>2</sub>CO<sub>3</sub> (54 mg, 0.39 mmol, 2.0 equiv) in CH<sub>3</sub>CN (2.0 mL). The resulting mixture was stirred at rt until the compound **53** was completely consumed as monitored by TLC. The solution was filtered, then concentrated and purified using column chromatography isolation on silica gel by gradient elution with hexane / ethyl acetate / methanol to give the amide **75** (47 mg) as a colorless oil in 80% yield. This is a known compound<sup>6</sup>. <sup>1</sup>H NMR (500 MHz, CDCl<sub>3</sub>) δ 7.33 – 7.28 (m, 2H), 7.27 – 7.21 (m, 5H), 7.20 – 7.16 (m, 1H), 7.13 – 7.08 (m, 2H), 4.02 – 3.95 (m, 1H), 3.77 – 3.67 (m, 1H), 3.61 – 3.47 (m, 2H), 3.39 – 3.30 (m, 2H), 2.98 (dd, *J* = 13.5, 6.7 Hz, 1H), 2.34 – 2.26 (m, 1H), 2.26 – 2.18 (m, 1H), 2.16 (s, 3H), 2.05 – 1.96 (m, 1H), 1.84 – 1.74 (m, 1H); <sup>13</sup>C NMR (101 MHz, CDCl<sub>3</sub>) δ 170.9, 139.9, 139.7, 129.2, 128.6, 128.1, 127.9, 126.9, 126.1, 54.6, 54.5, 50.8, 45.8, 45.4, 41.9, 41.0.

## XI. Supplementary References

- (1) M. Frisch, G. Trucks, H. Schlegel, G. Scuseria, M. Robb, J. Cheeseman, G. Scalmani, V. Barone, B. Mennucci, G. Petersson, *Gaussian Inc., Wallingford CT*, **2010**.
- (2) J. A. Montgomery Jr., M. J. Frisch, J. W. Ochterski, G. A. Petersson, *J. Chem. Phys.* **1999**, *110*, 2822-2827.
- (3) J. A. Montgomery Jr., M. J. Frisch, J. W. Ochterski, G. A. Petersson, *J. Chem. Phys.* **2000**, *112*, 6532-6542.
- (4) B. Mennucci, J. Tomasi, *J. Chem. Phys.* **1997**, *106*, 5151-5158.
- (5) S. J. Blanksby, G. B. Ellison, *Acc. Chem. Res.* **2003**, *36*, 255-263.
- (6) M. S. Poslusney, C. Sevel, T. J. Utley, T. M. Bridges, R. D. Morrison, N. R. Kett, D. J. Sheffler, C. M. Niswender, J. S. Daniels, P. J. Conn, C. W. Lindsley, M. R. Wood, *Bioorg. Med. Chem. Lett.* **2012**, *22*, 6923-6928.

## XII. ORTEP Drawings for the Major Diastereomer of 41

Table S2. Crystal data and structure refinement for 41-major.

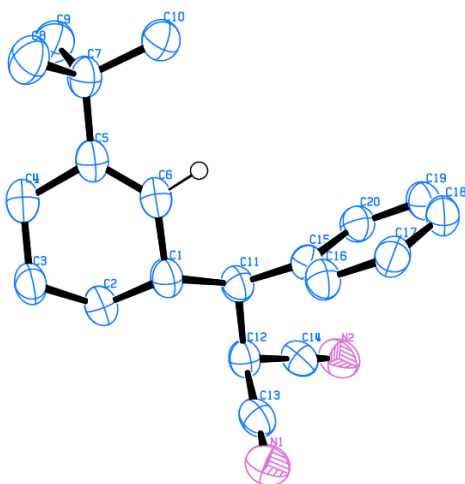

|                                 |                                                         |
|---------------------------------|---------------------------------------------------------|
| Identification code             | <b>41-major</b>                                         |
| Empirical formula               | C <sub>20</sub> H <sub>24</sub> N <sub>2</sub>          |
| Formula weight                  | 292.41                                                  |
| Temperature                     | 100(2) K                                                |
| Wavelength                      | 1.54178 Å                                               |
| Crystal system                  | Monoclinic                                              |
| Space group                     | P2 <sub>1</sub> /n                                      |
| Unit cell dimensions            | a = 16.6451(18) Å<br>b = 5.8536(6) Å<br>c = 19.416(2) Å |
| Volume                          | 1730.6(3) Å <sup>3</sup>                                |
| Z                               | 4                                                       |
| Density (calculated)            | 1.122 Mg/m <sup>3</sup>                                 |
| Absorption coefficient          | 0.499 mm <sup>-1</sup>                                  |
| F(000)                          | 632                                                     |
| Crystal size                    | 0.594 x 0.046 x 0.043 mm <sup>3</sup>                   |
| Theta range for data collection | 2.963 to 66.678°.                                       |
| Index ranges                    | -18<=h<=19, -6<=k<=6, -23<=l<=23                        |
| Reflections collected           | 14377                                                   |
| Independent reflections         | 3030 [R(int) = 0.1171]                                  |
| Completeness to theta = 66.678° | 99.5 %                                                  |
| Absorption correction           | Semi-empirical from equivalents                         |
| Max. and min. transmission      | 0.7528 and 0.4273                                       |
| Refinement method               | Full-matrix least-squares on F <sup>2</sup>             |
| Data / restraints / parameters  | 3030 / 0 / 202                                          |

---

|                                      |                                    |
|--------------------------------------|------------------------------------|
| Goodness-of-fit on $F^2$             | 1.032                              |
| Final R indices [ $I > 2\sigma(I)$ ] | R1 = 0.0794, wR2 = 0.1965          |
| R indices (all data)                 | R1 = 0.1297, wR2 = 0.2432          |
| Extinction coefficient               | n/a                                |
| Largest diff. peak and hole          | 0.323 and -0.331 e.Å <sup>-3</sup> |

---

### XIII. $^1\text{H}$ , $^{13}\text{C}$ NMR Spectra of Products

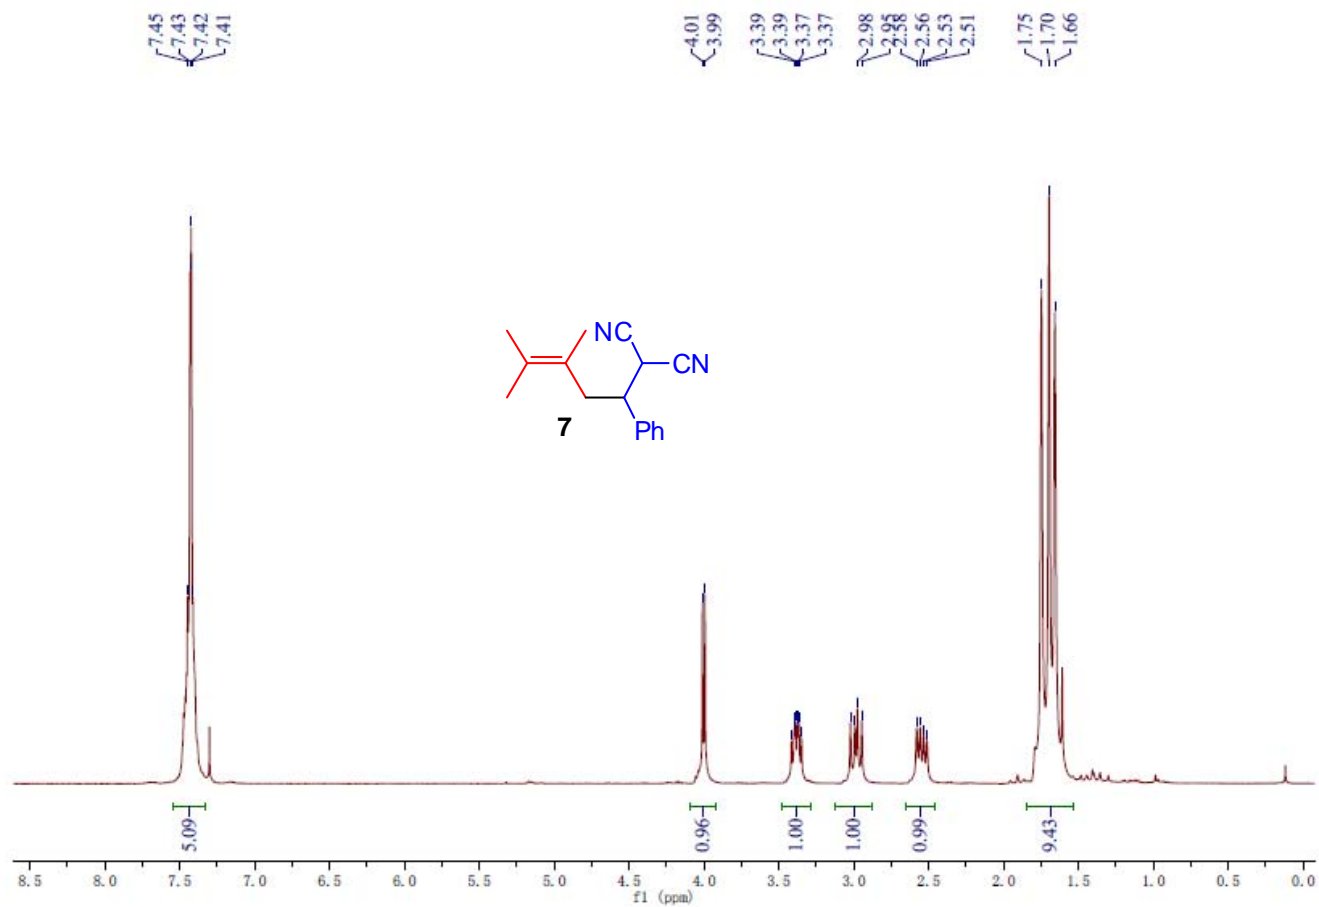

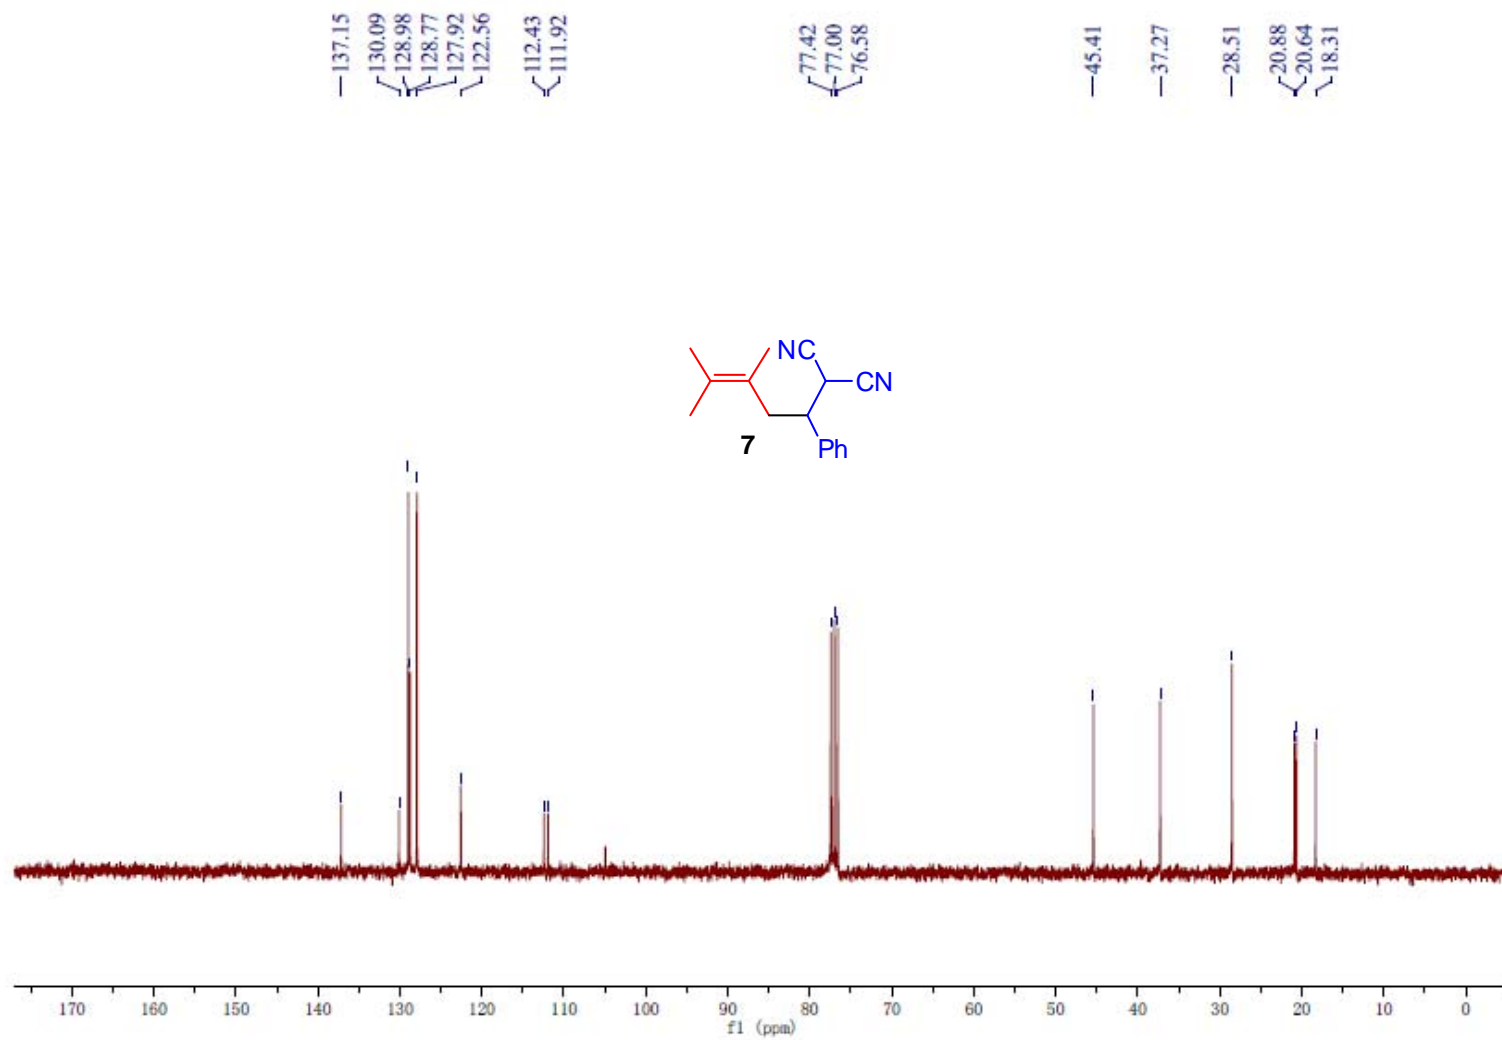

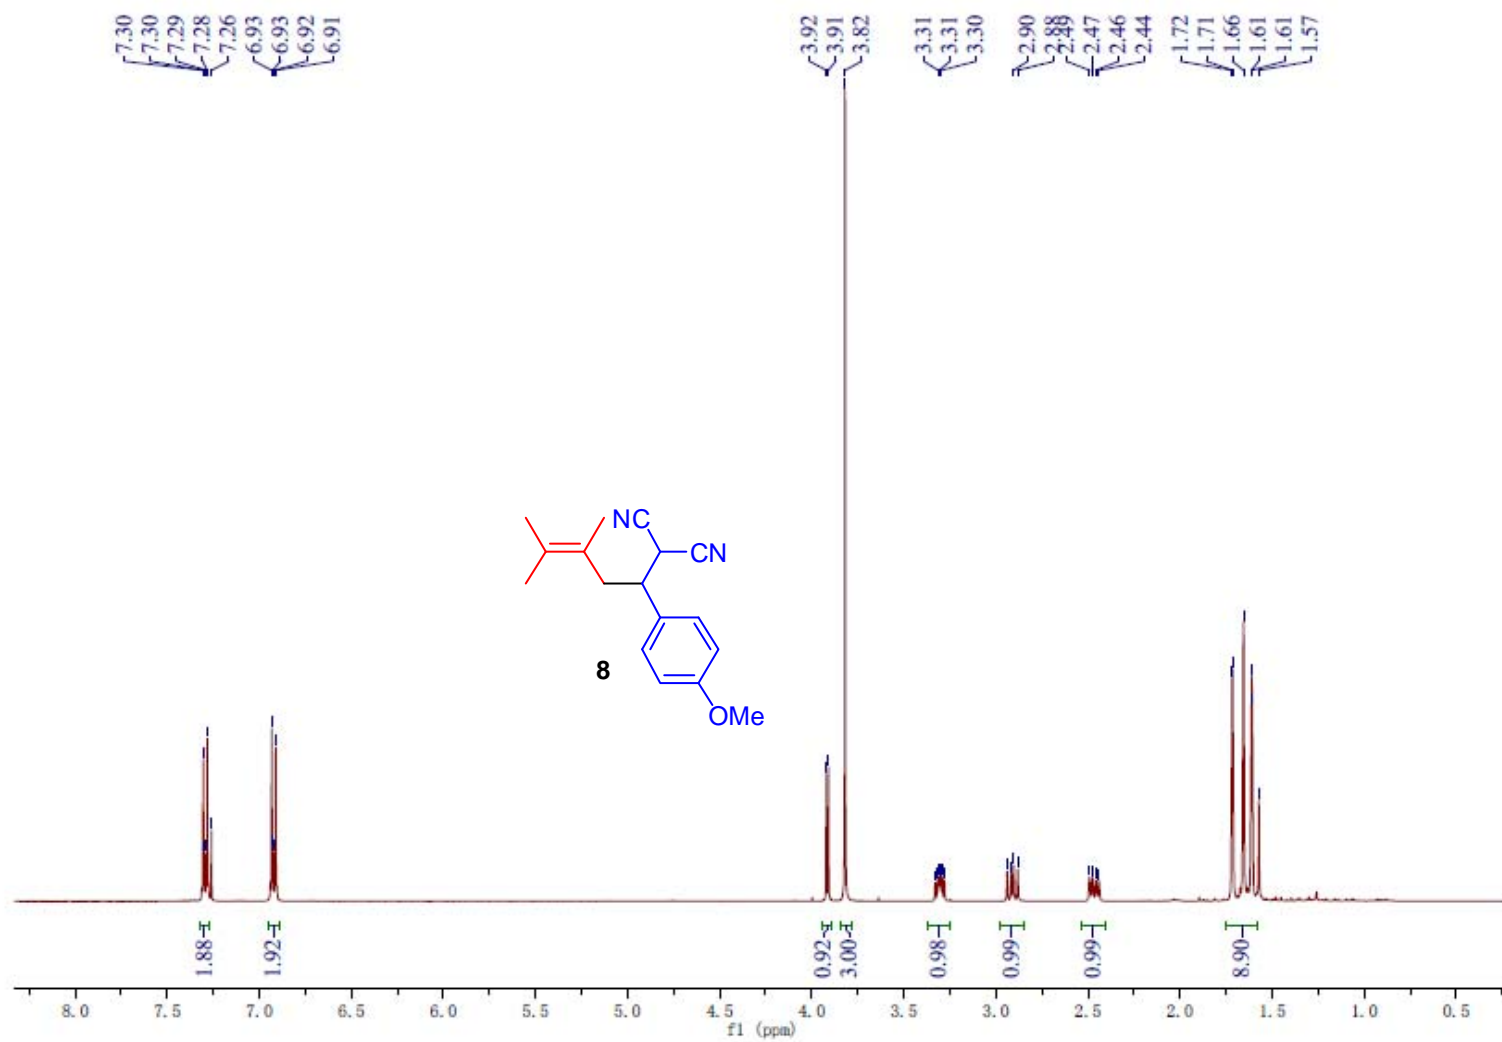

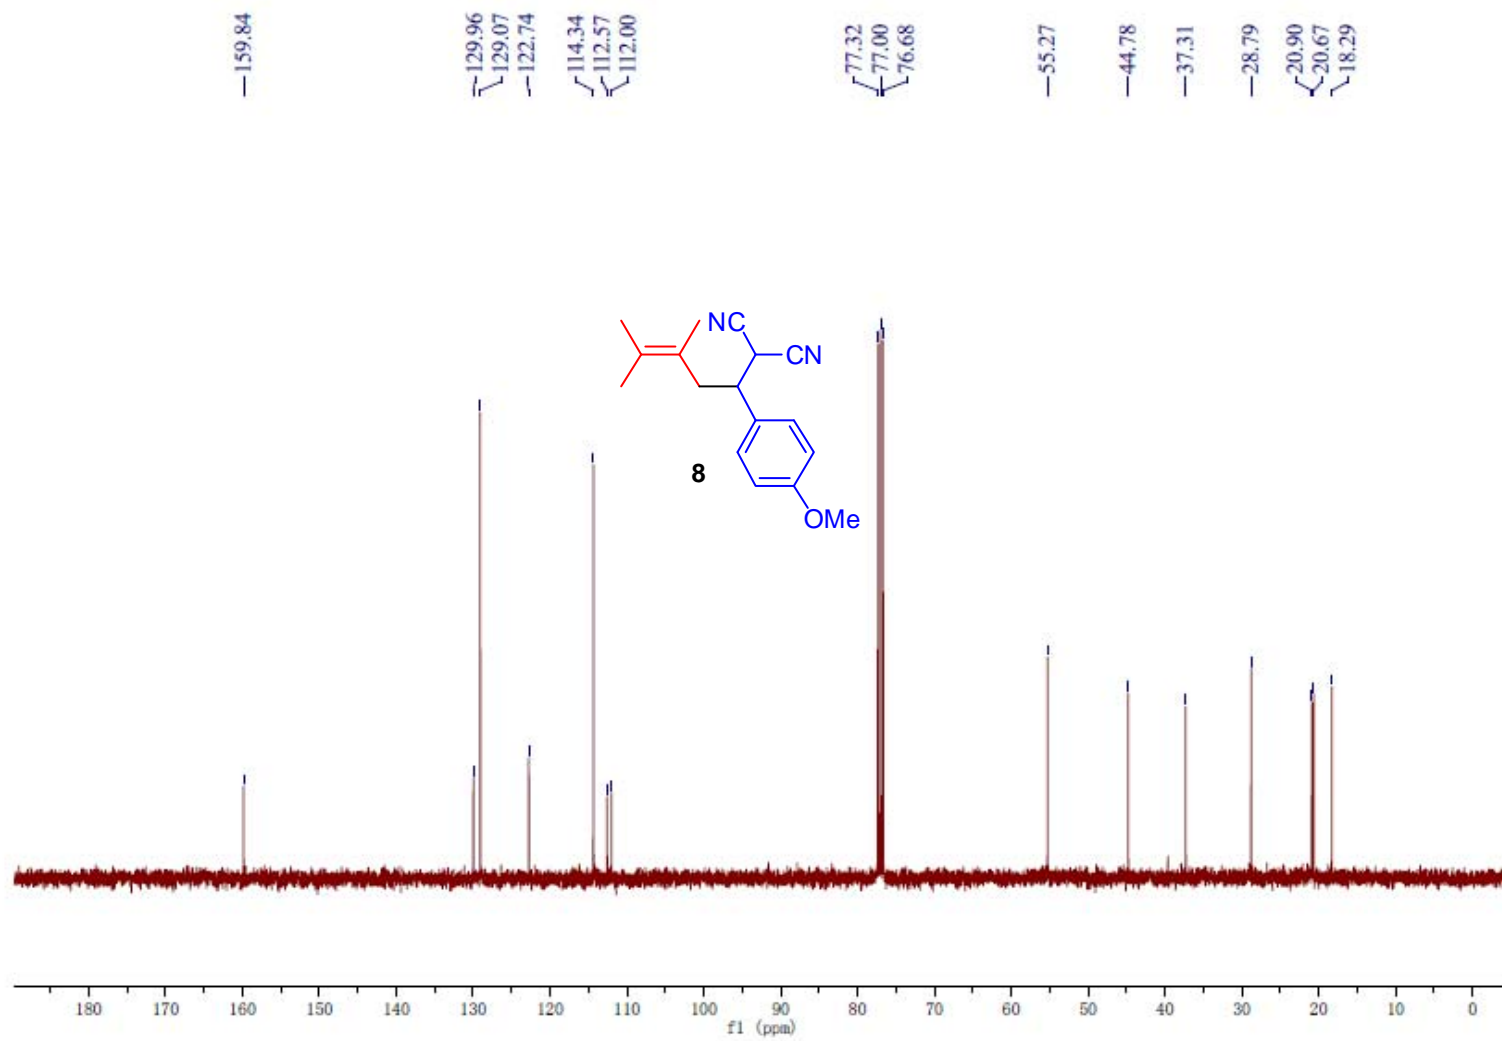

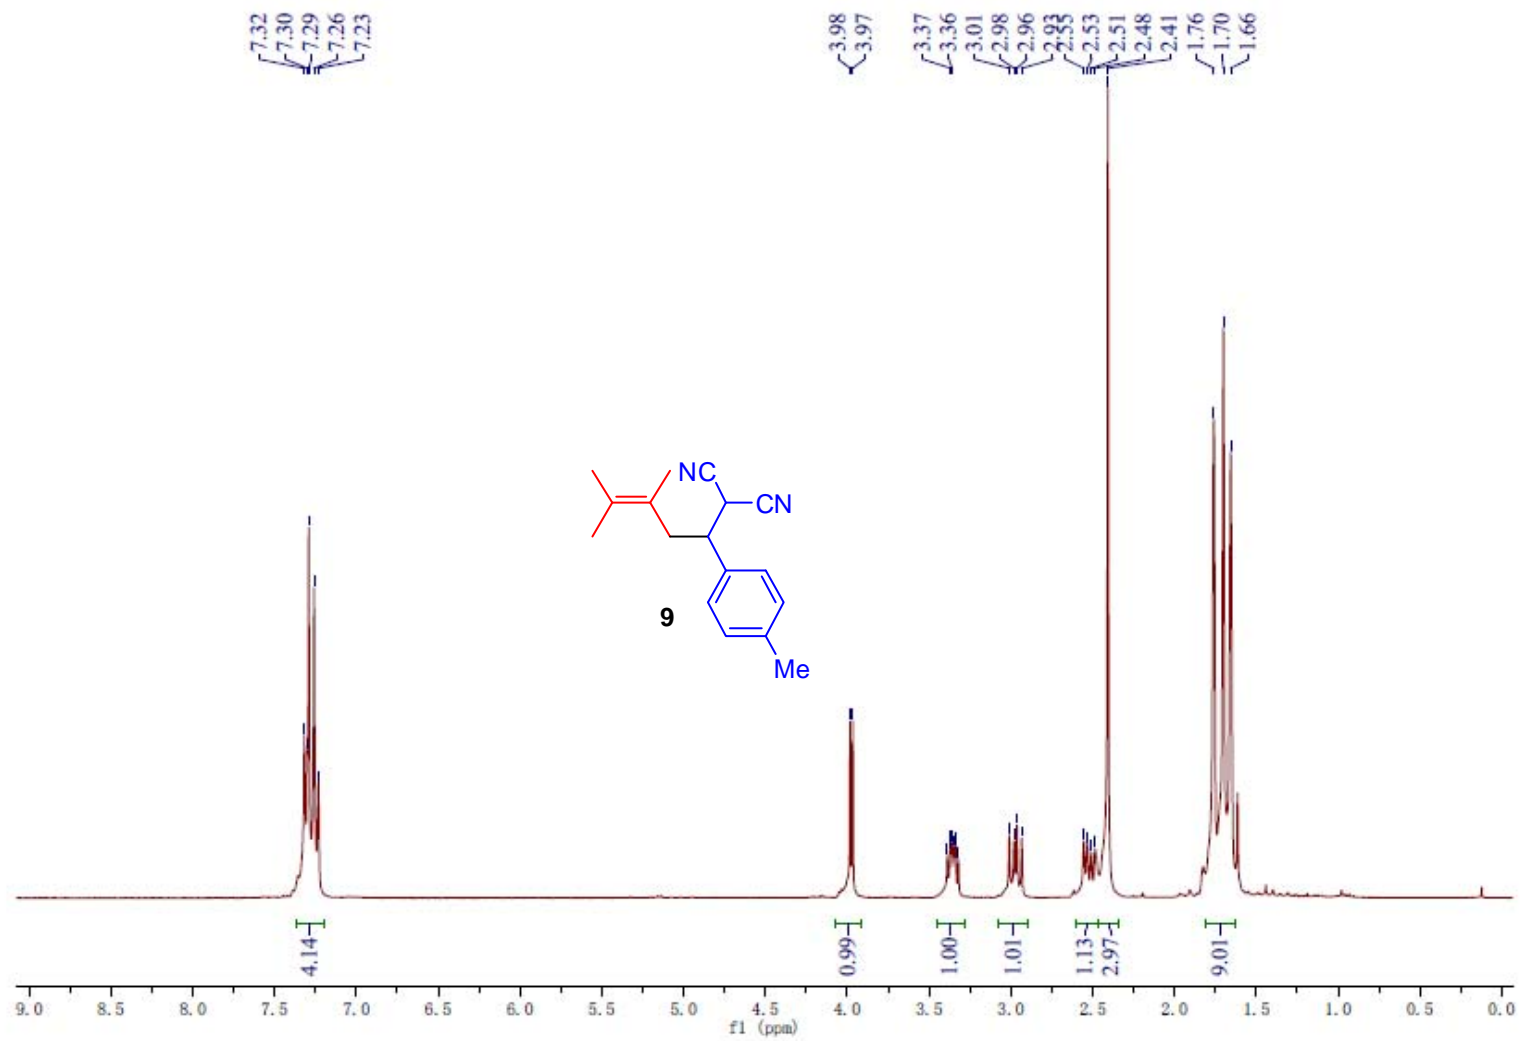



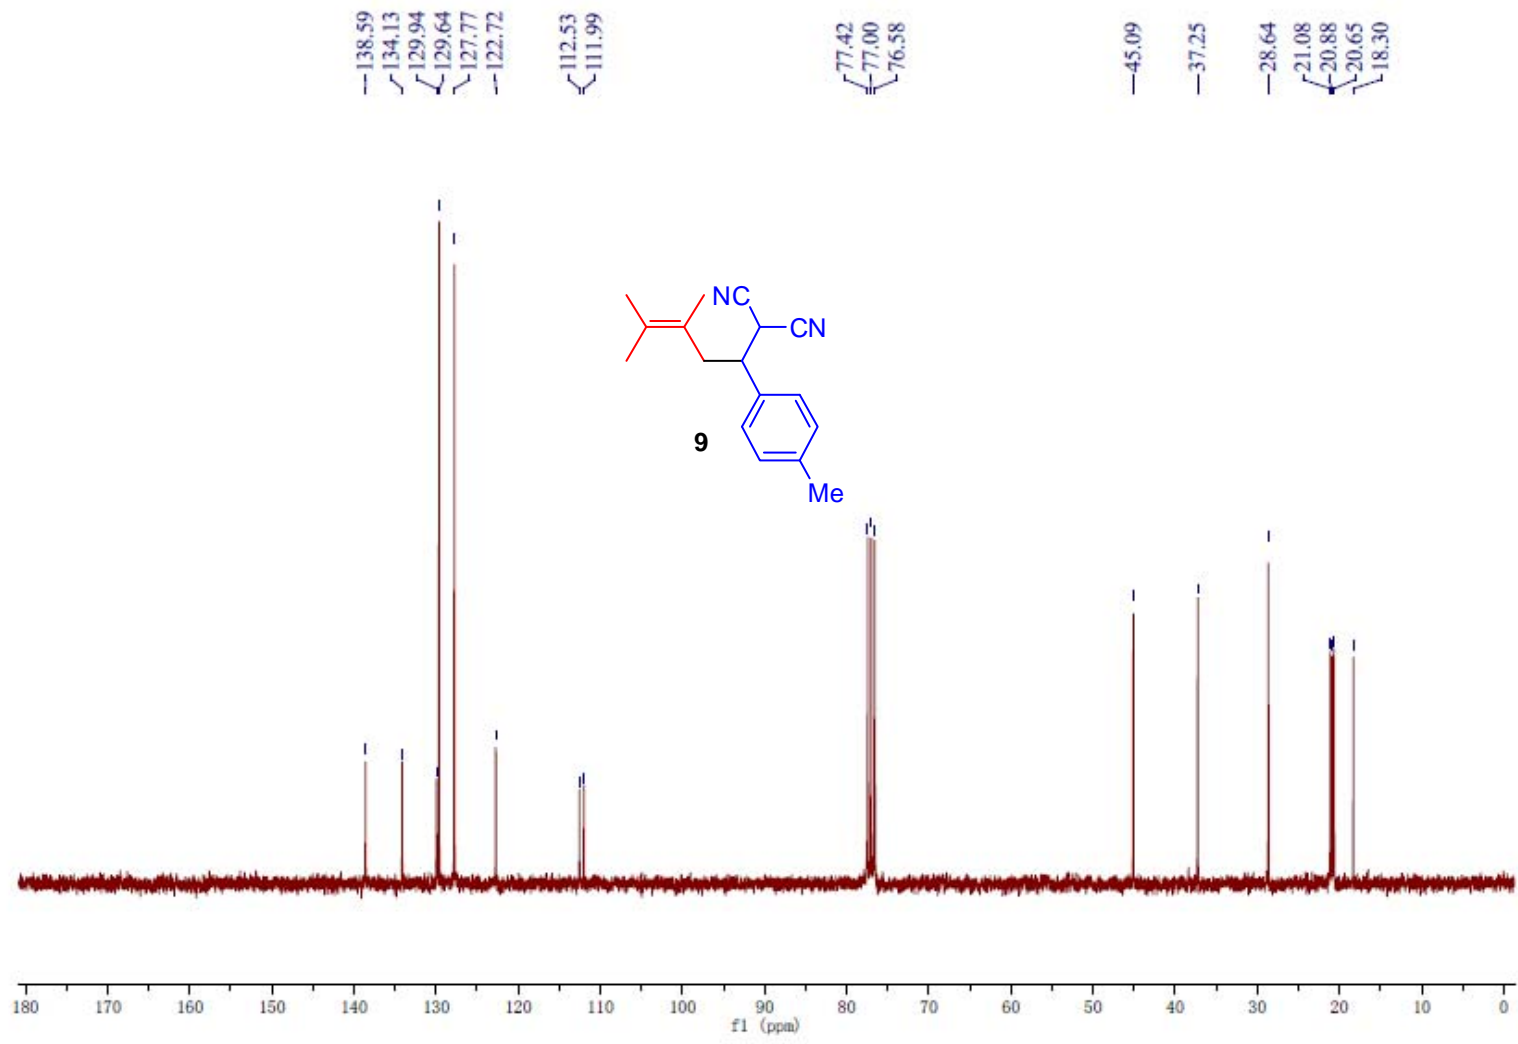

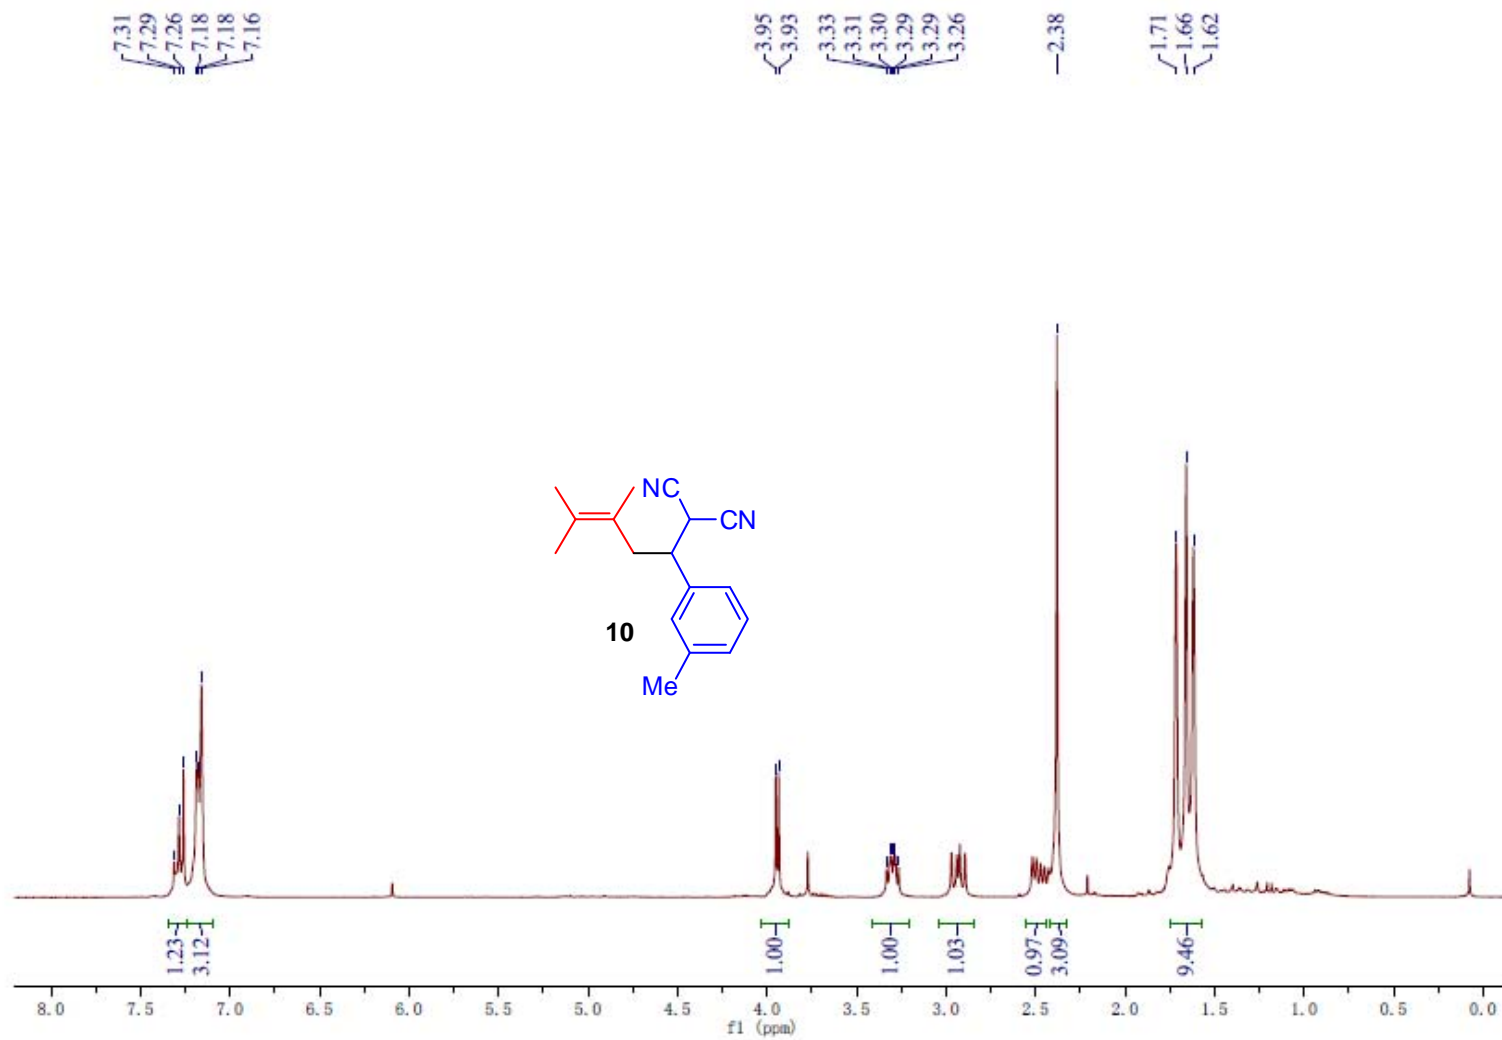

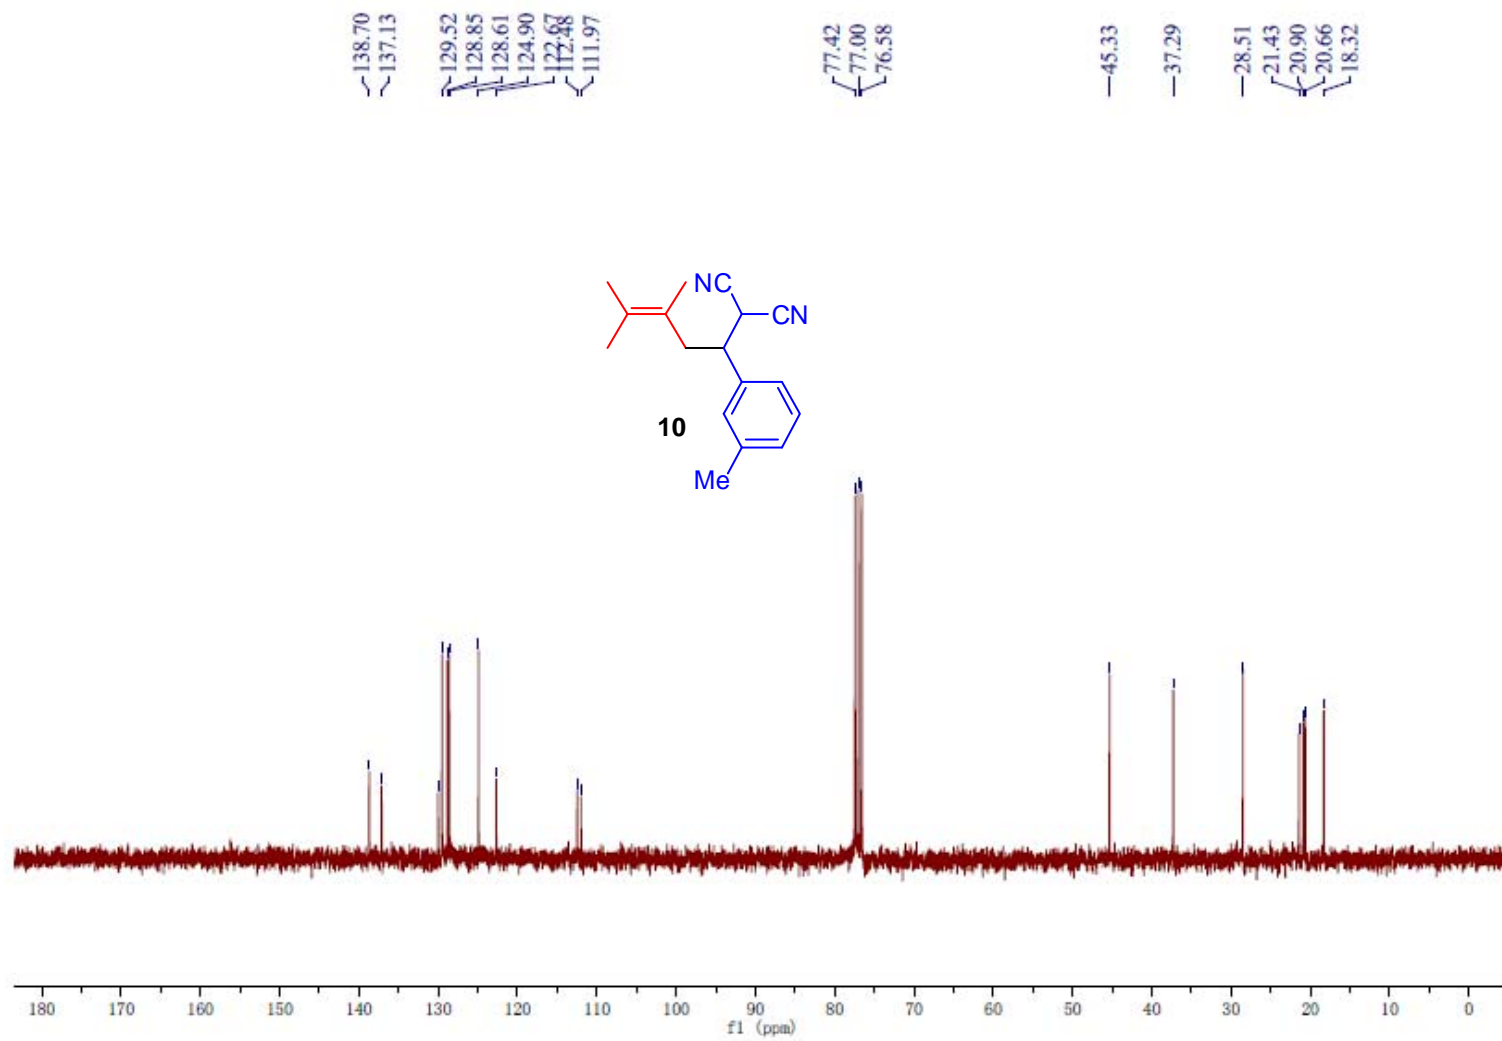

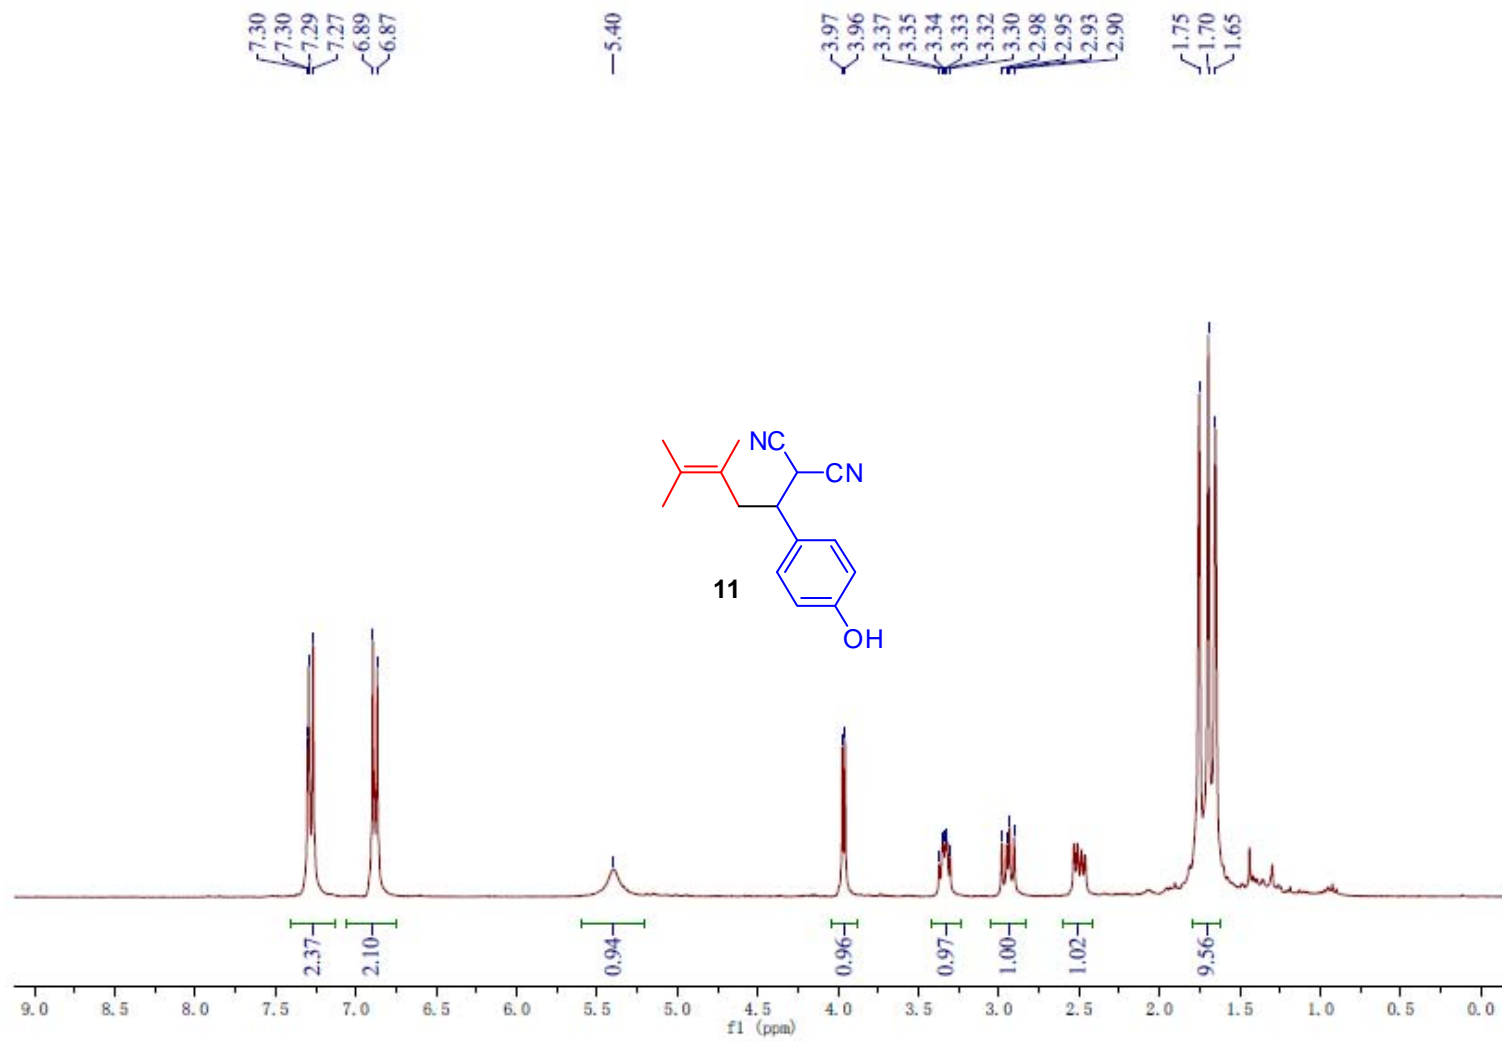

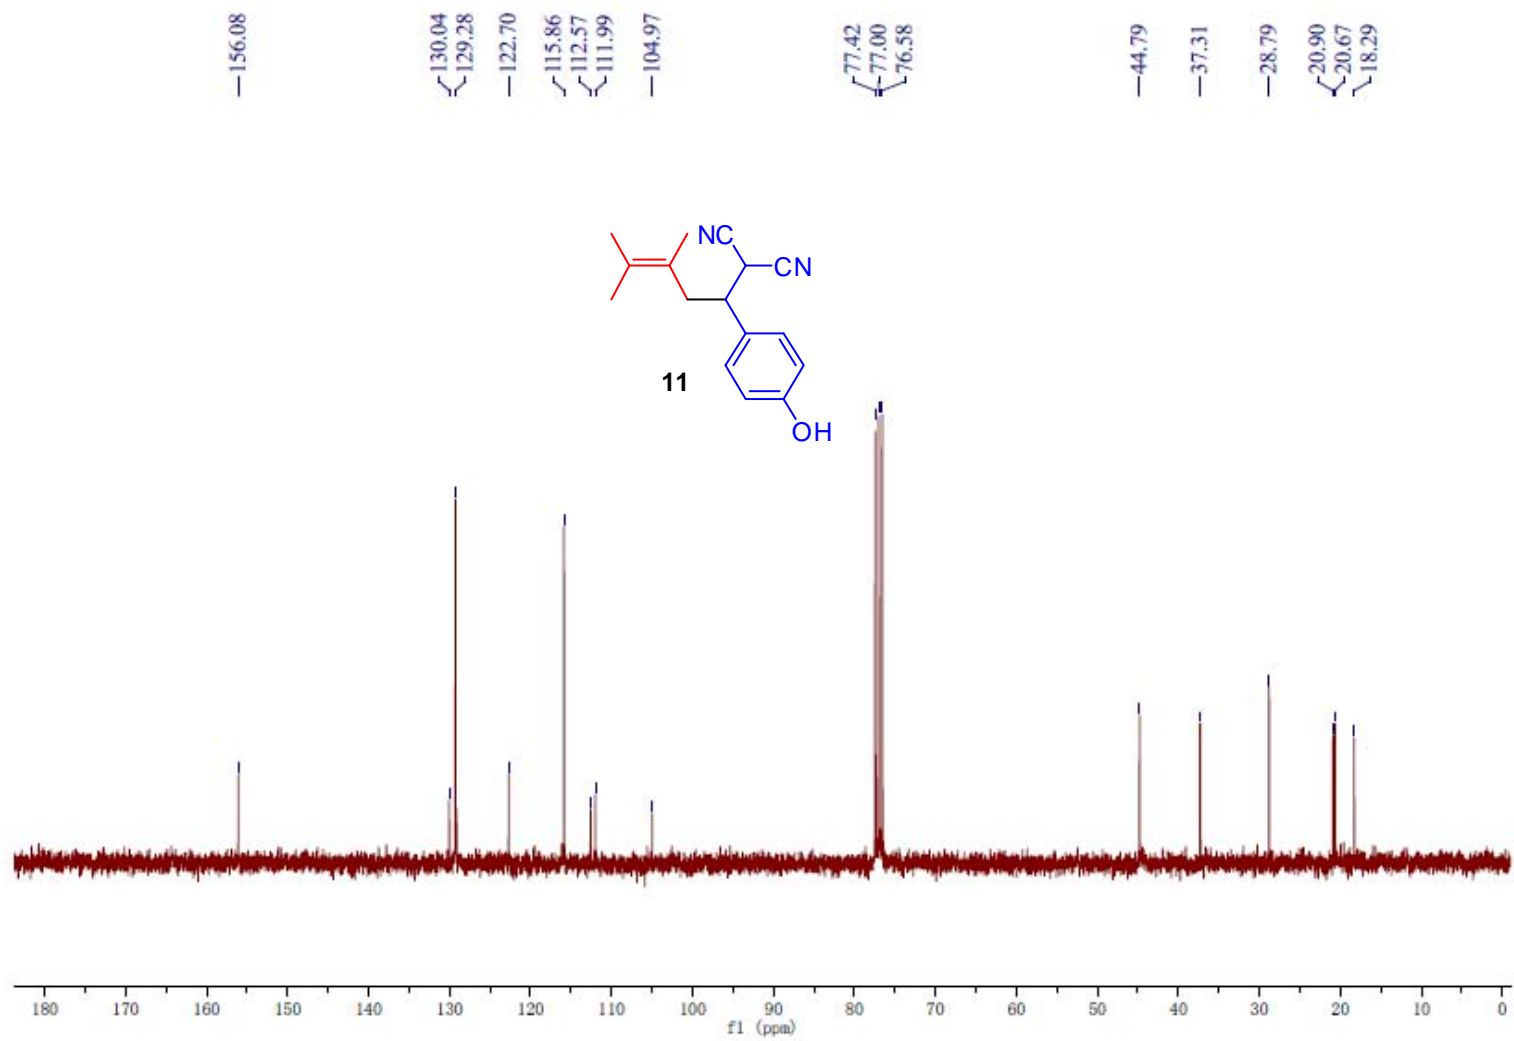

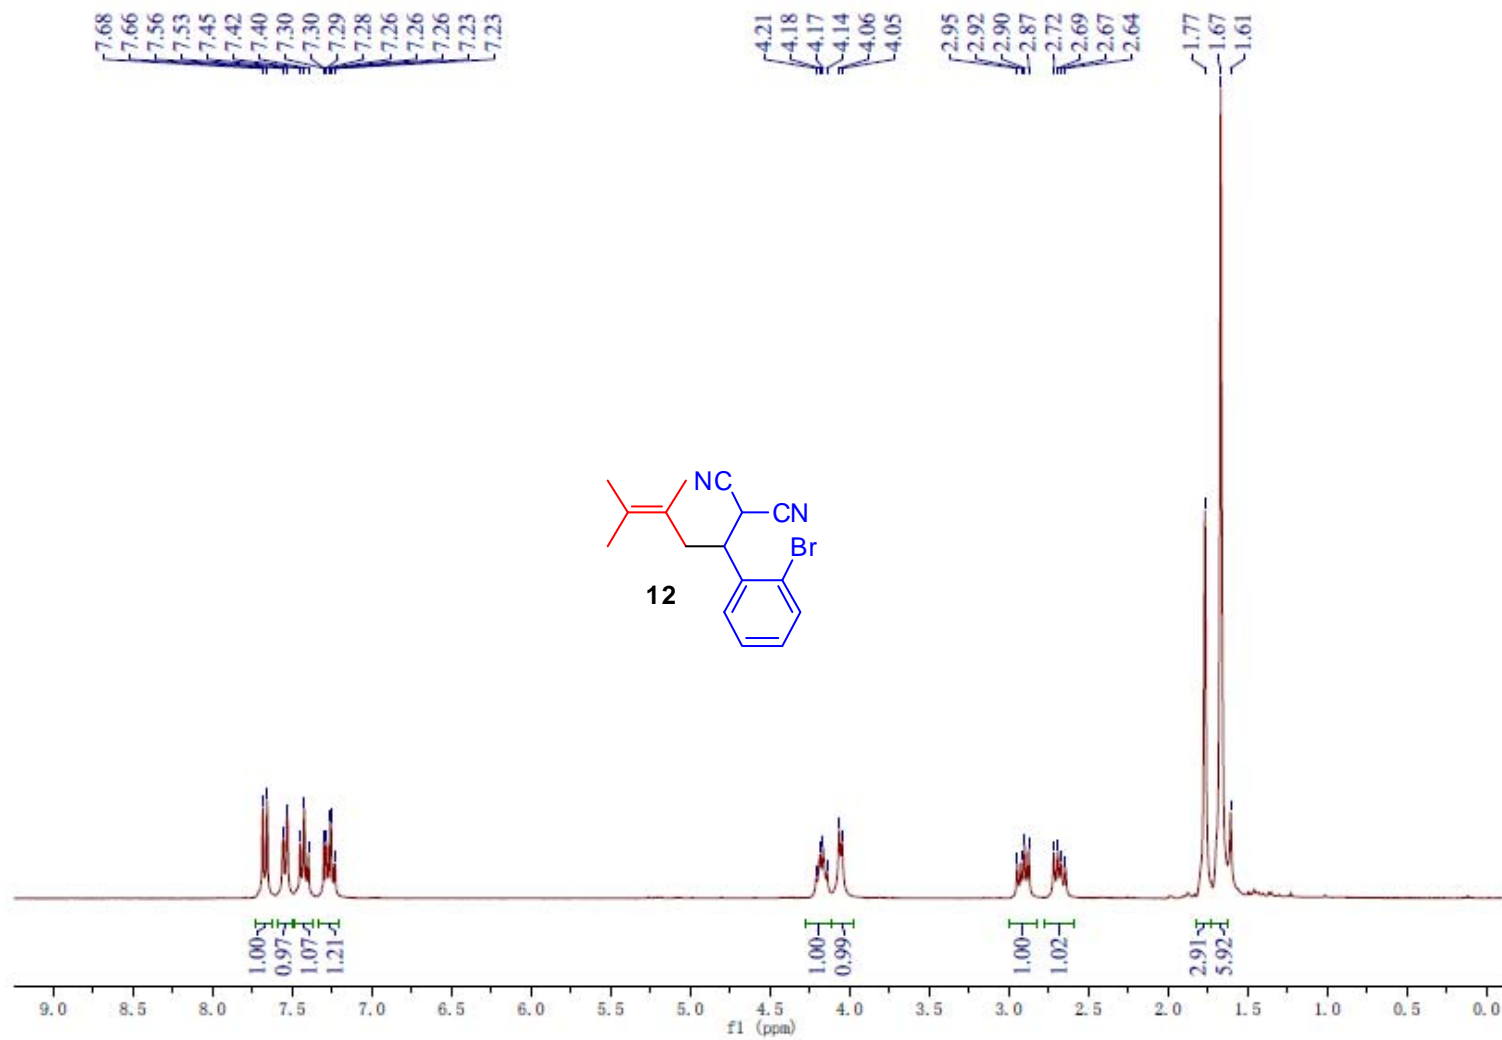

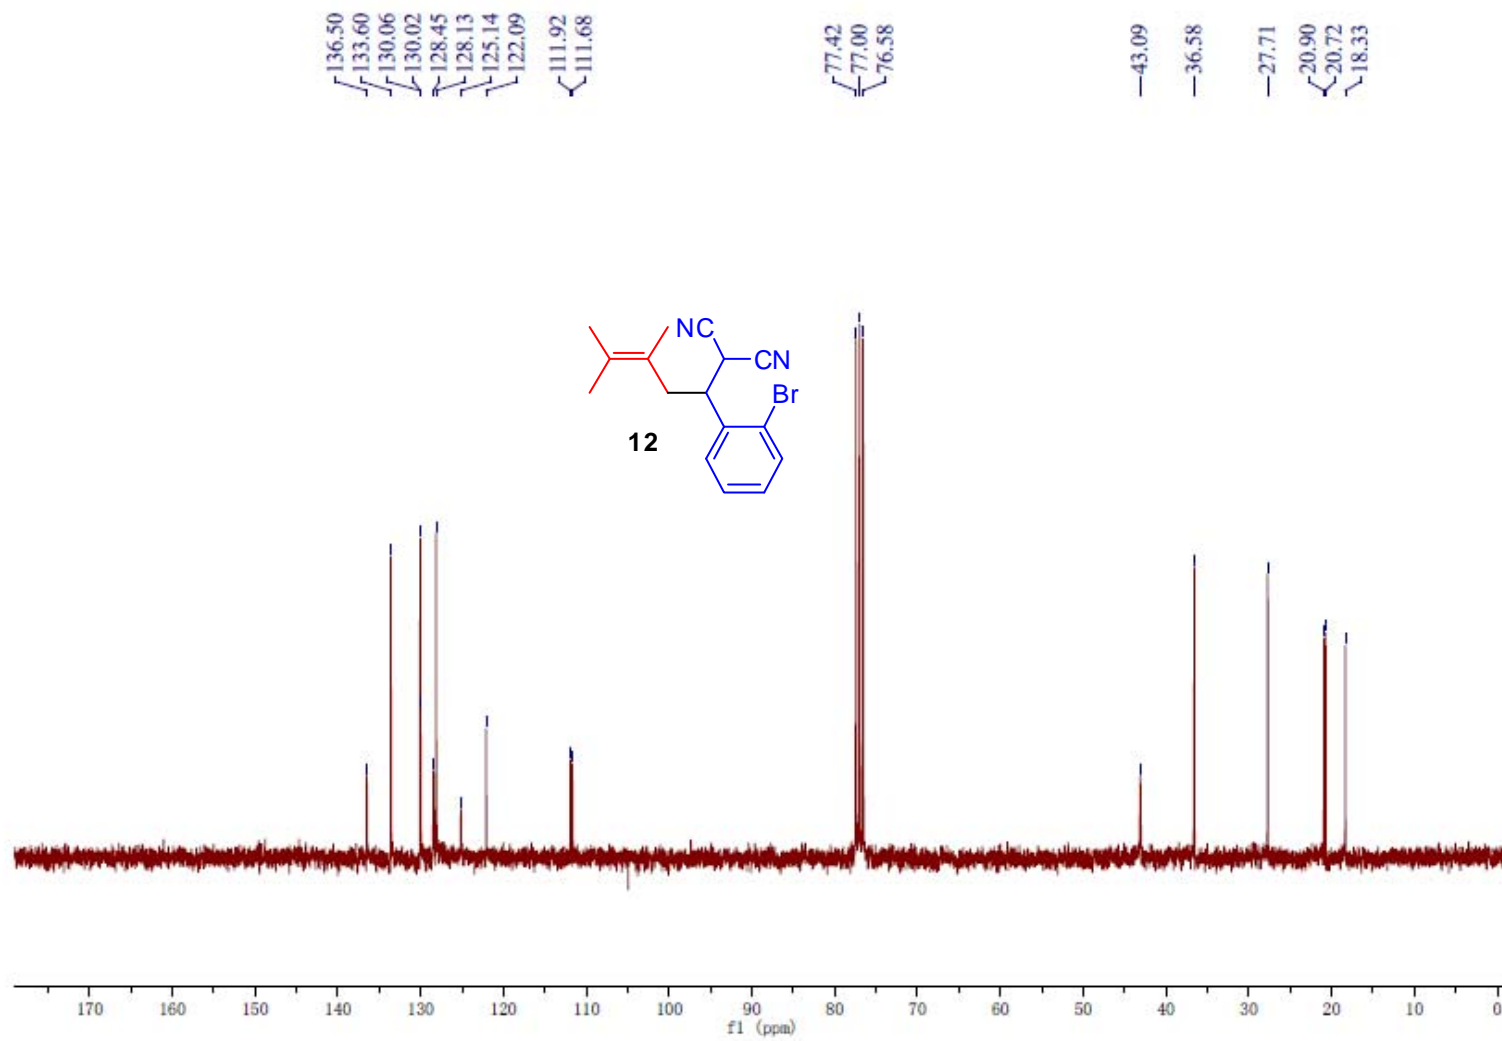

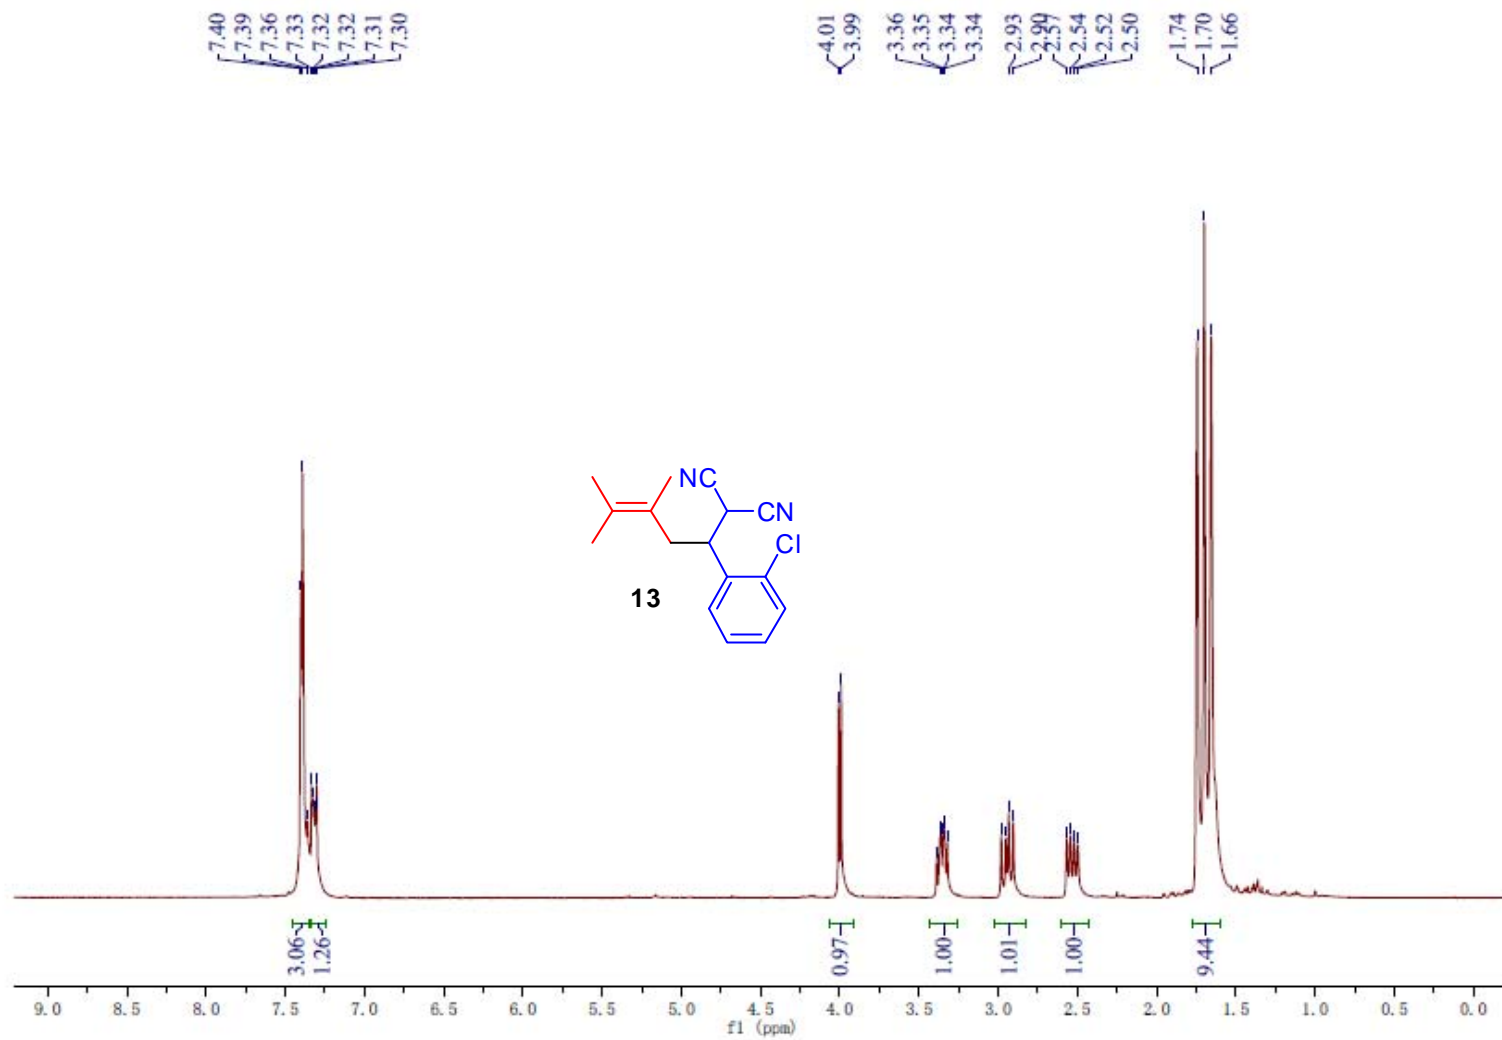



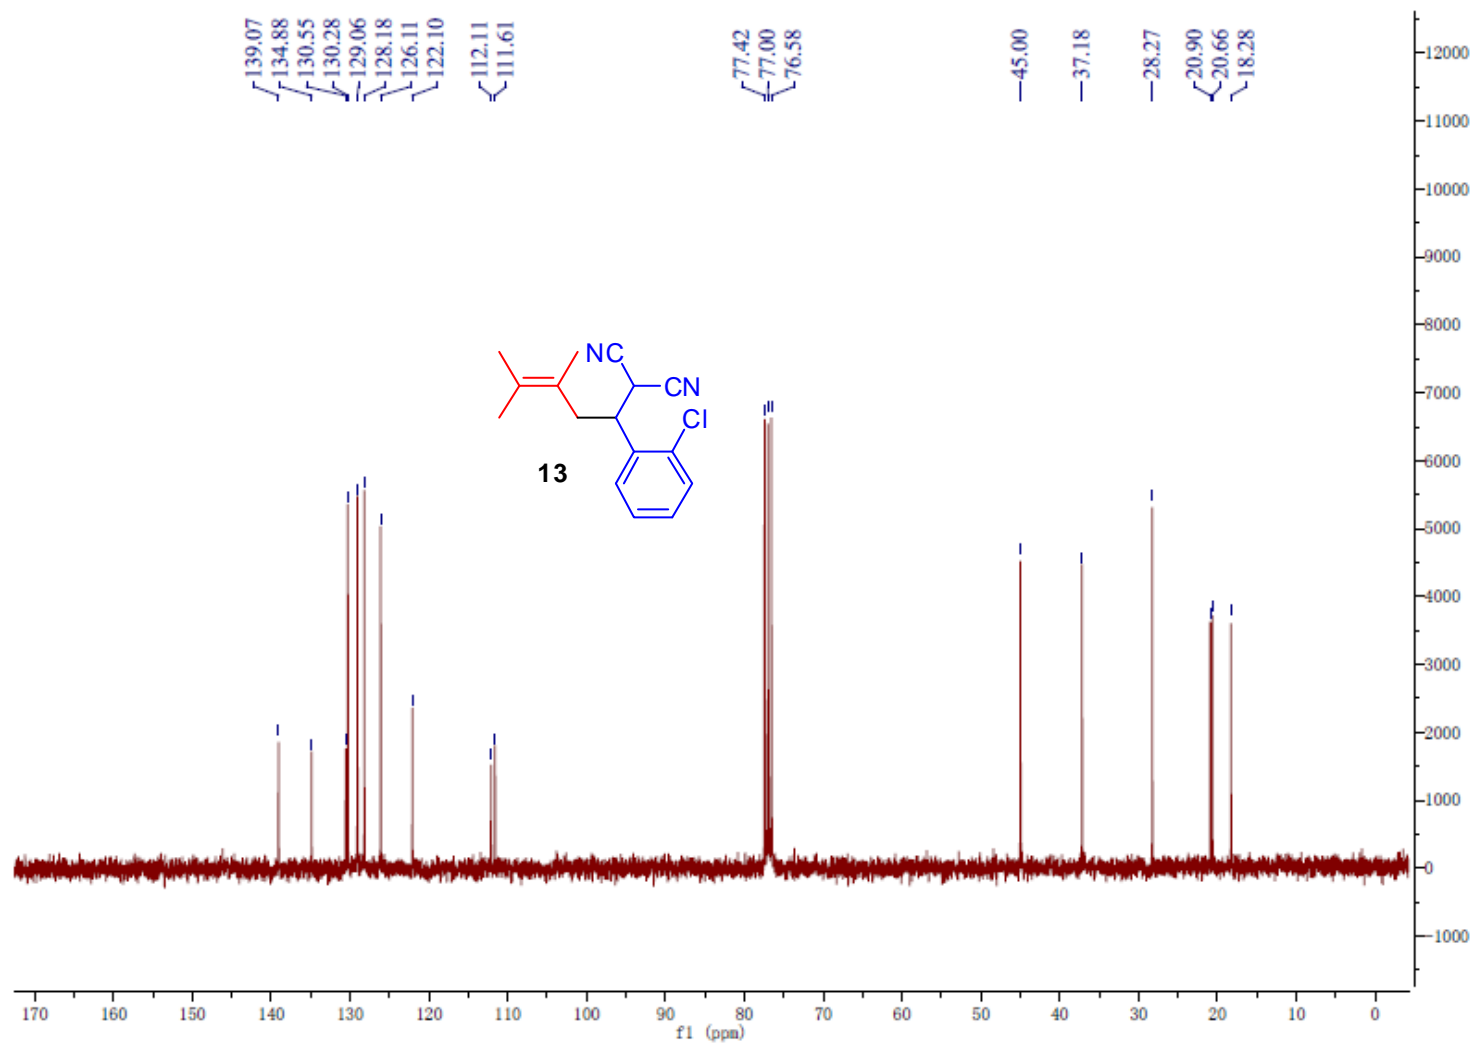

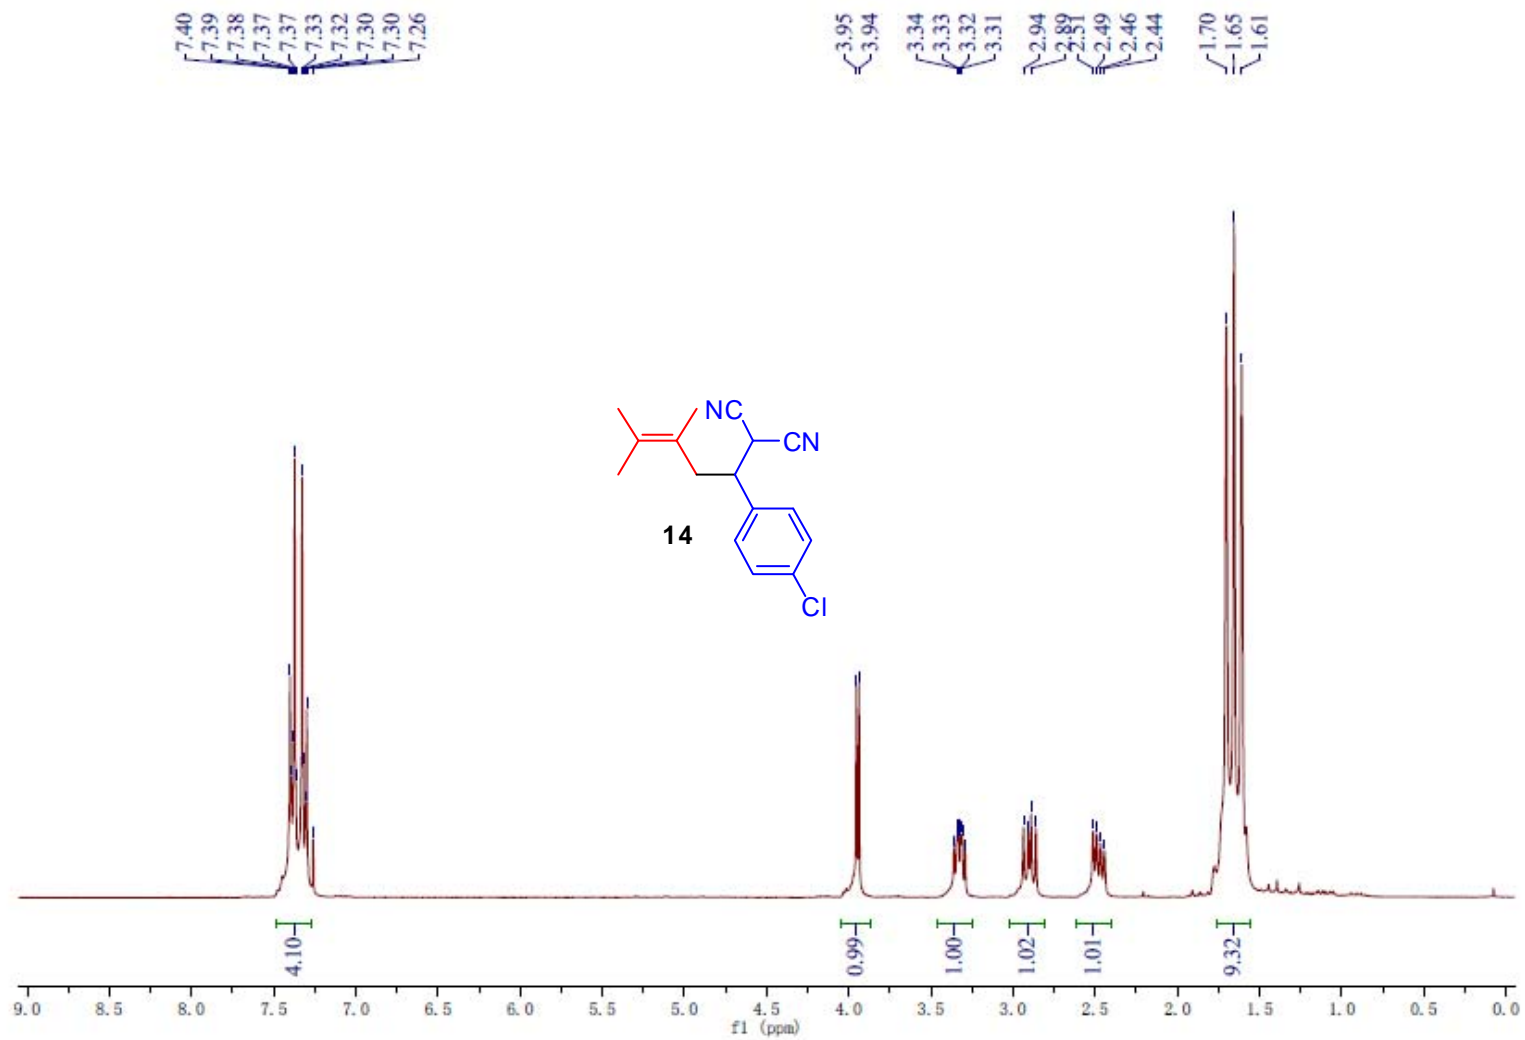

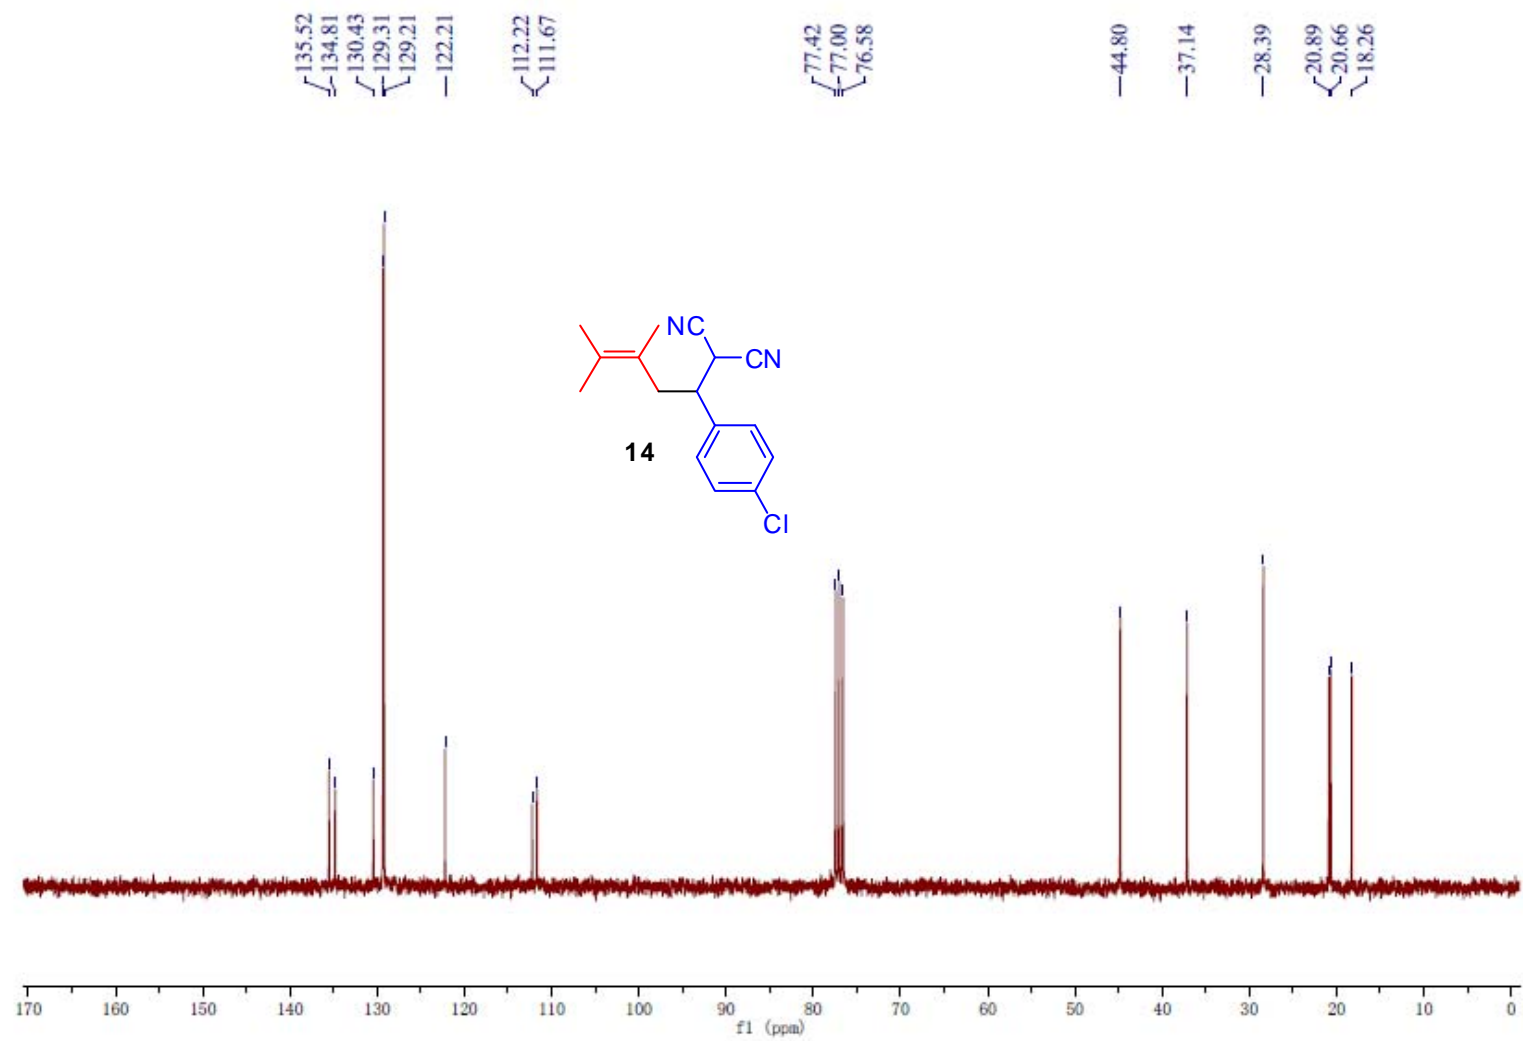

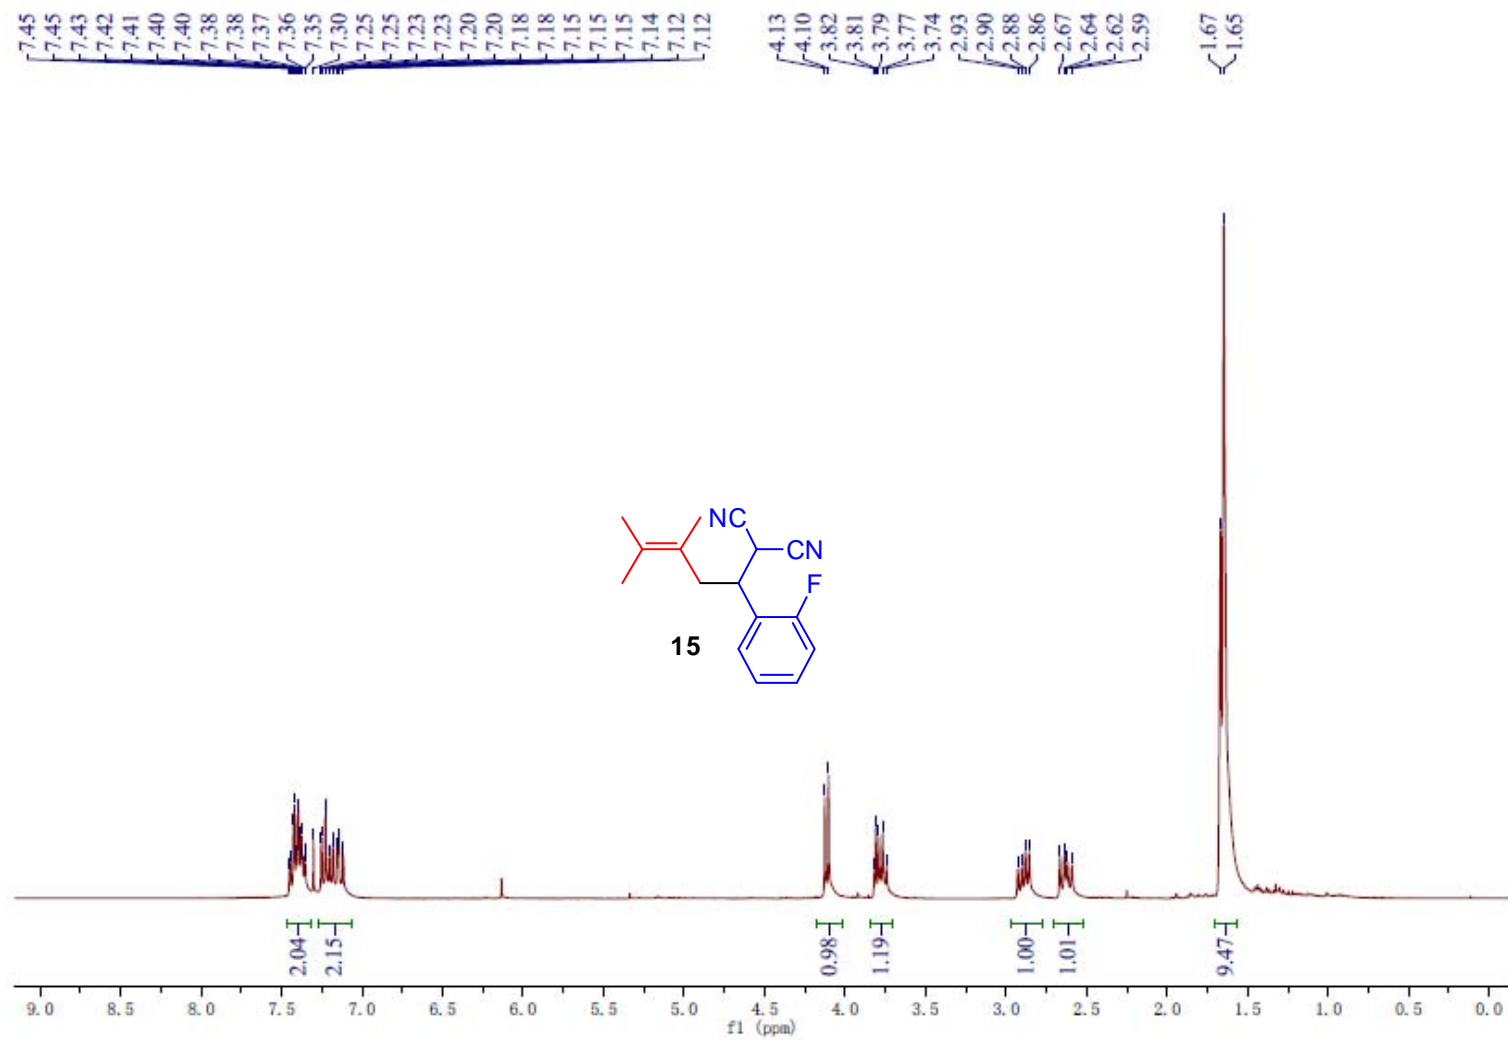

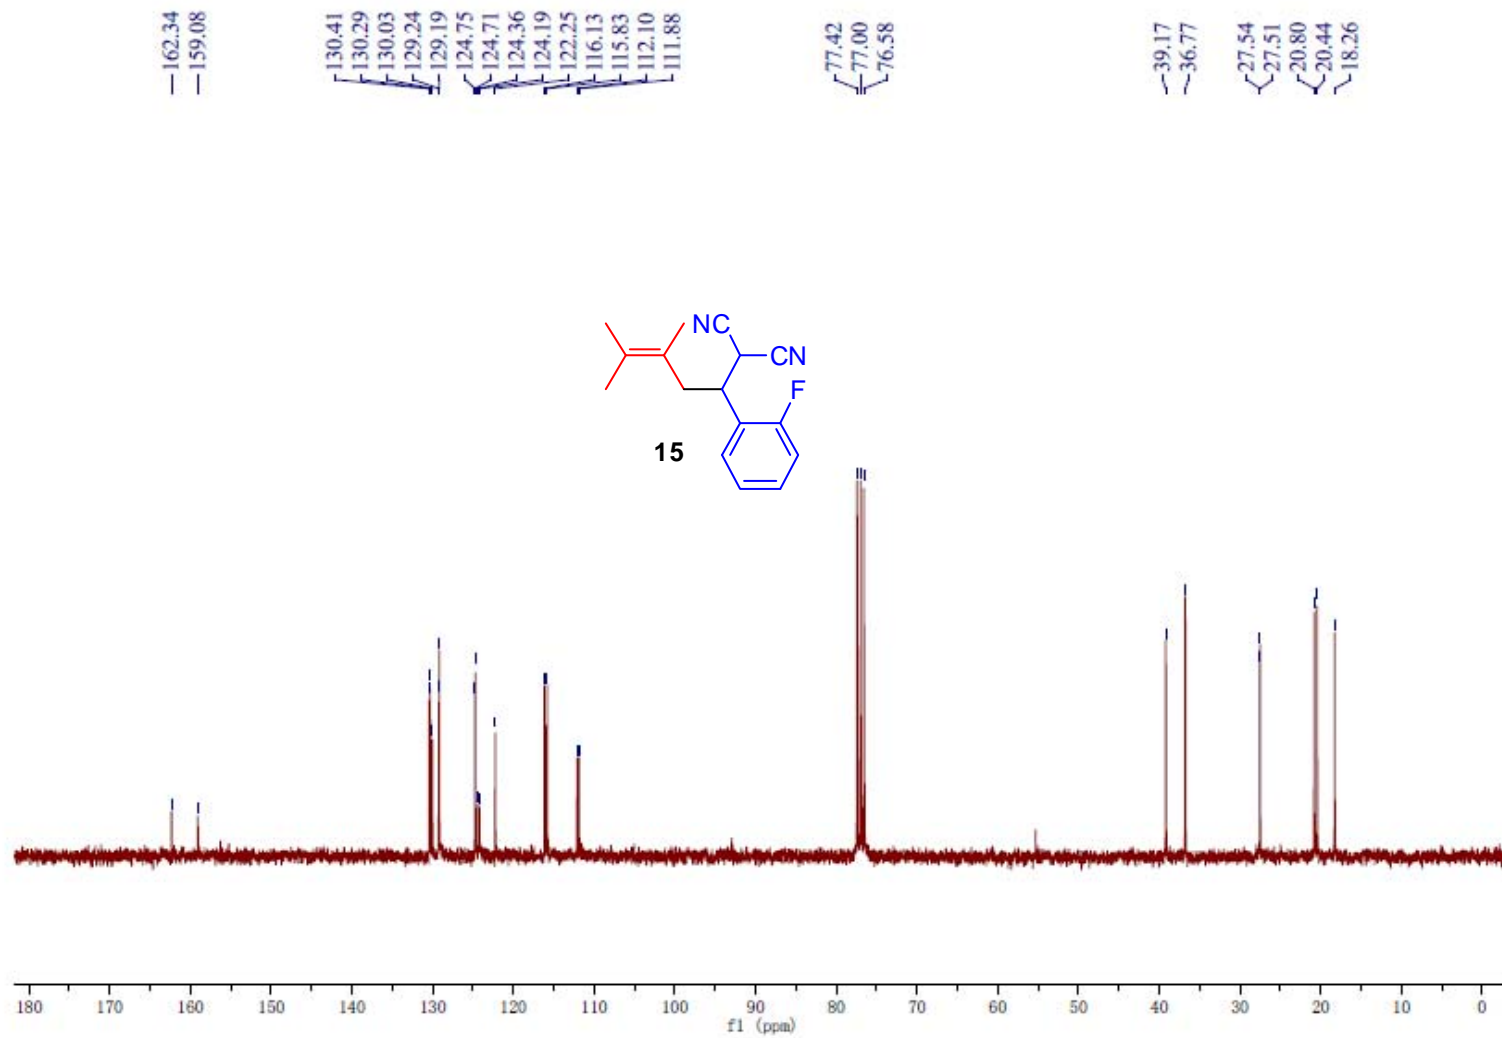

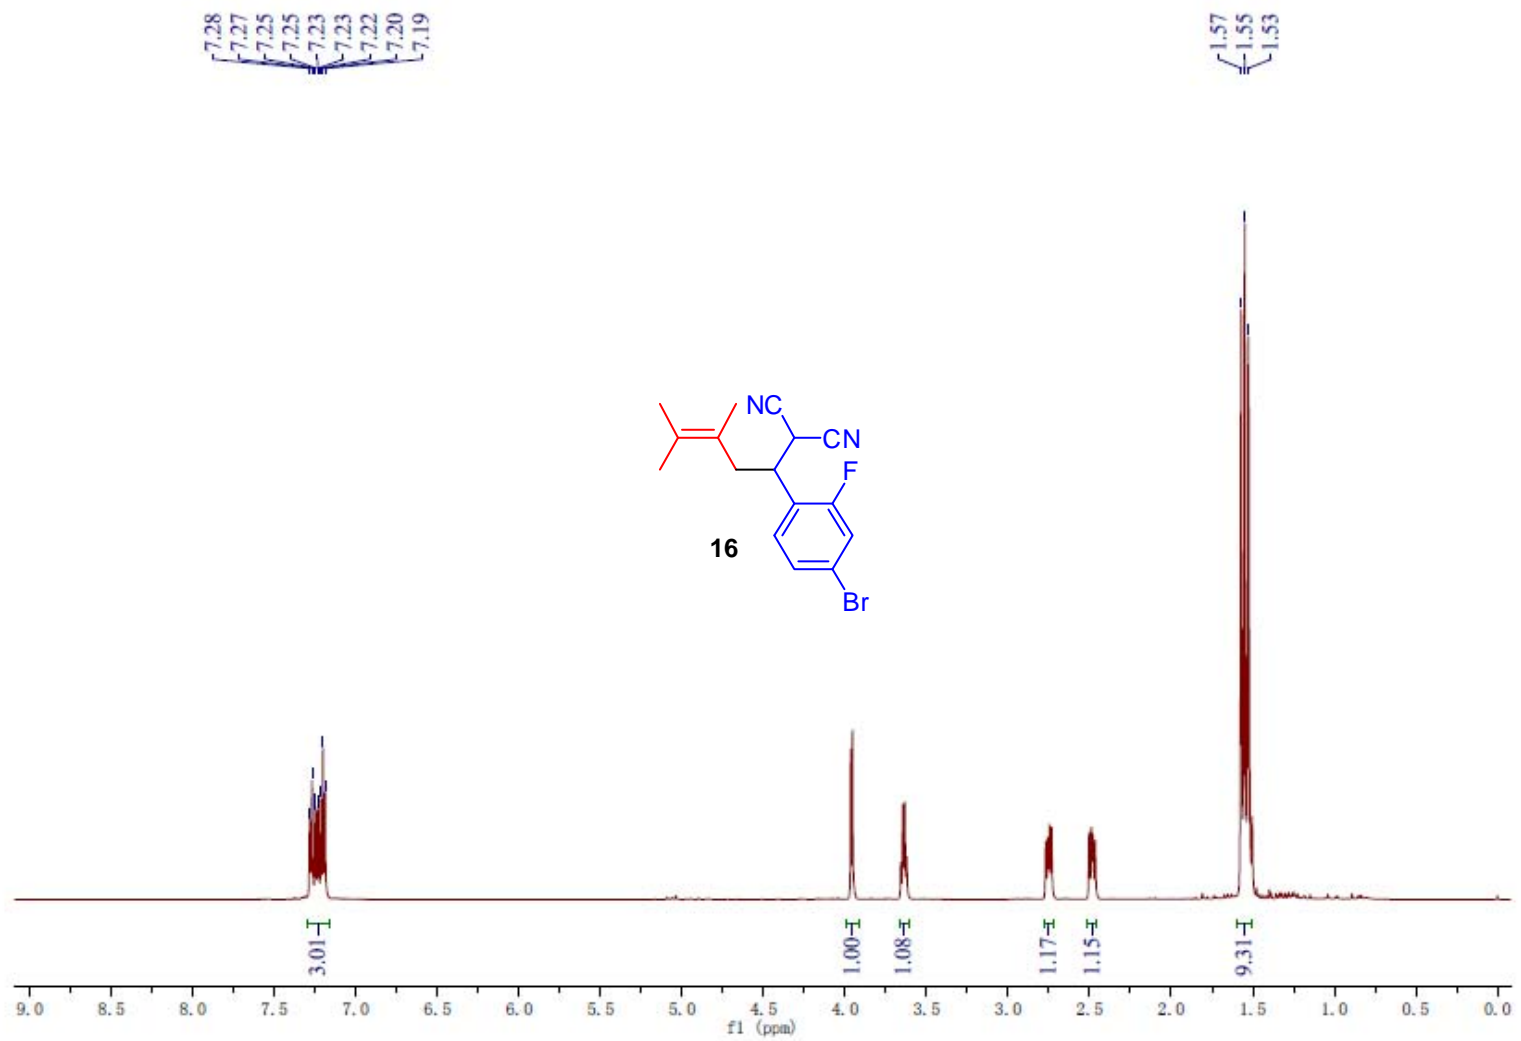

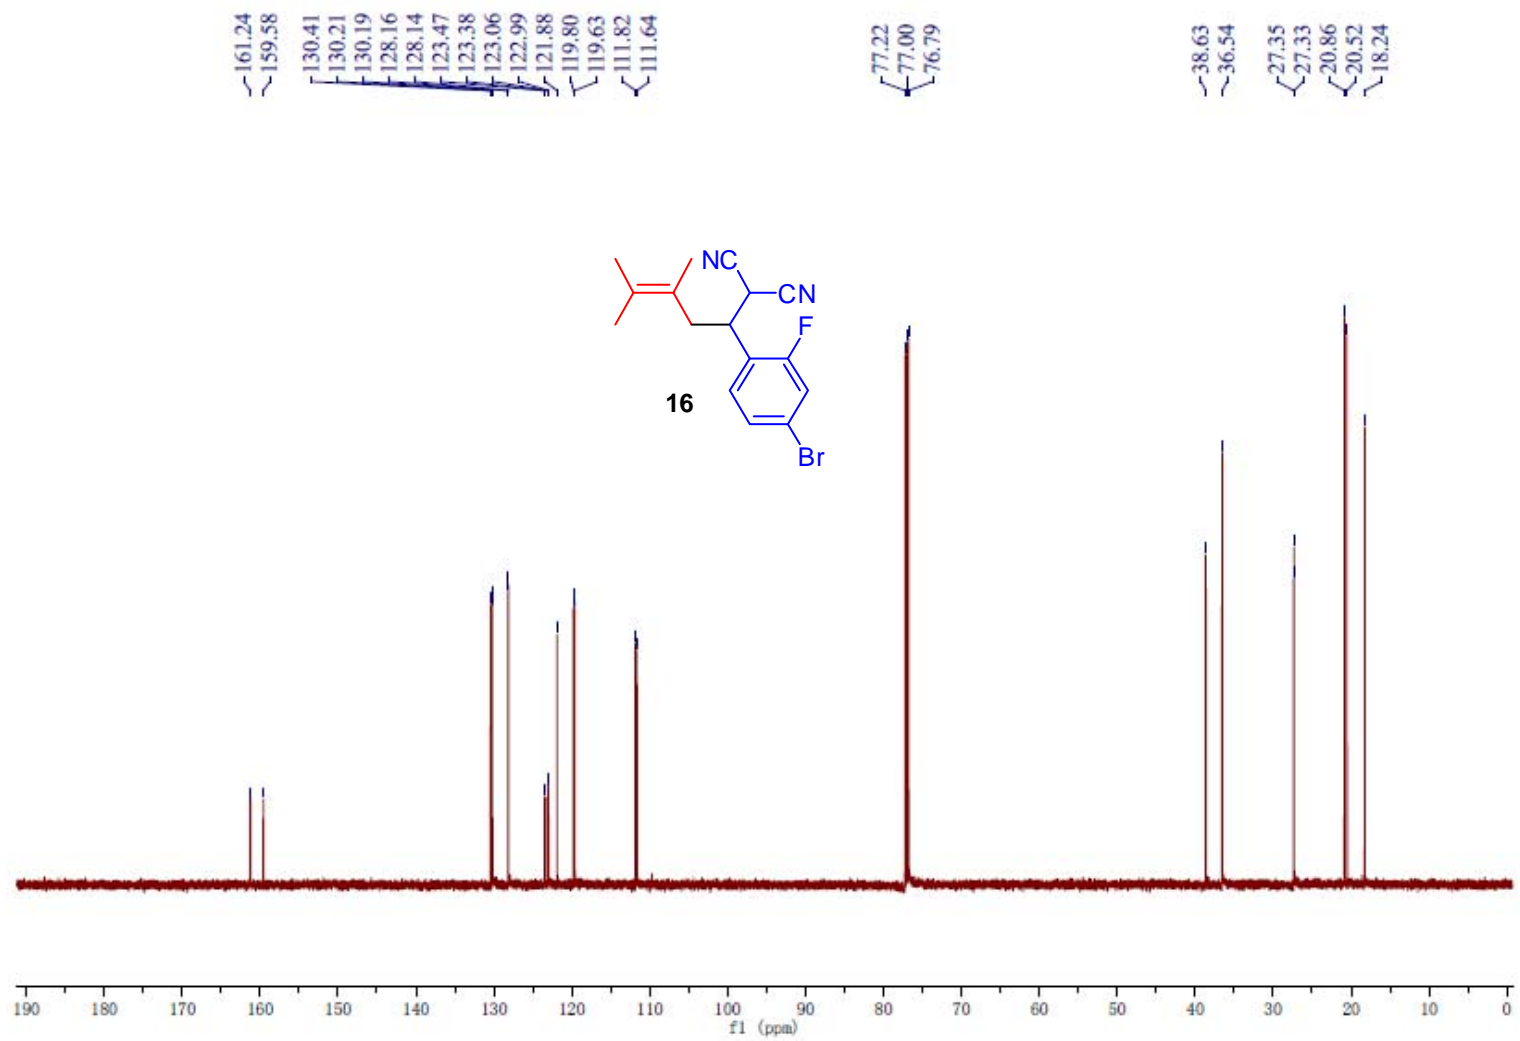

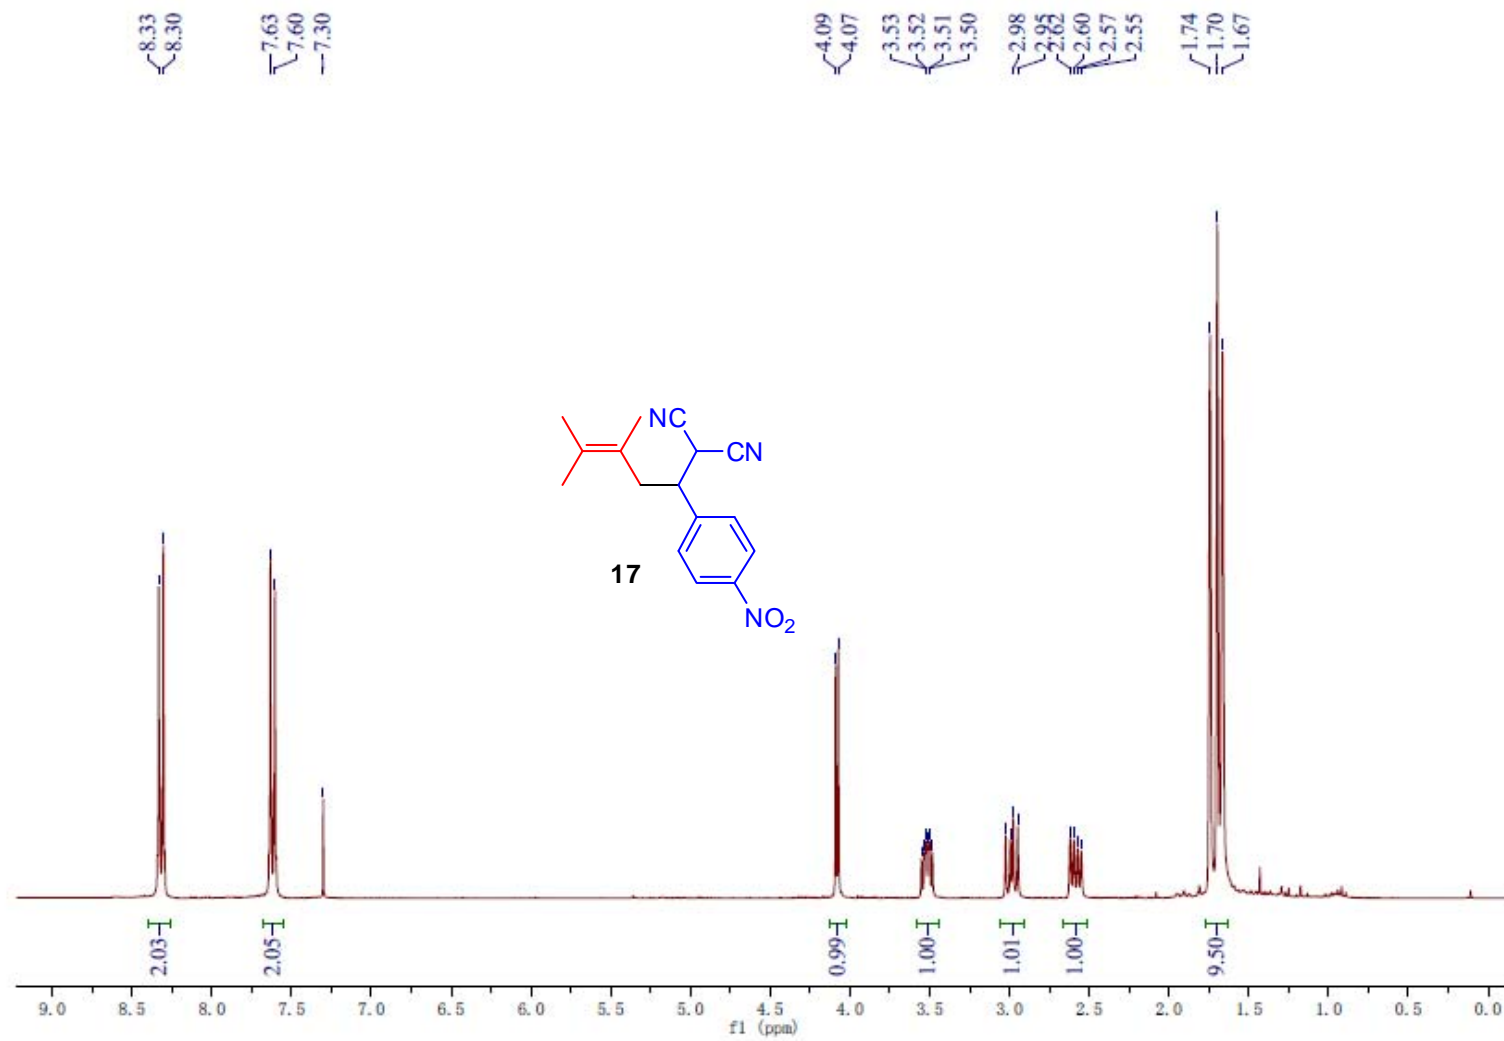



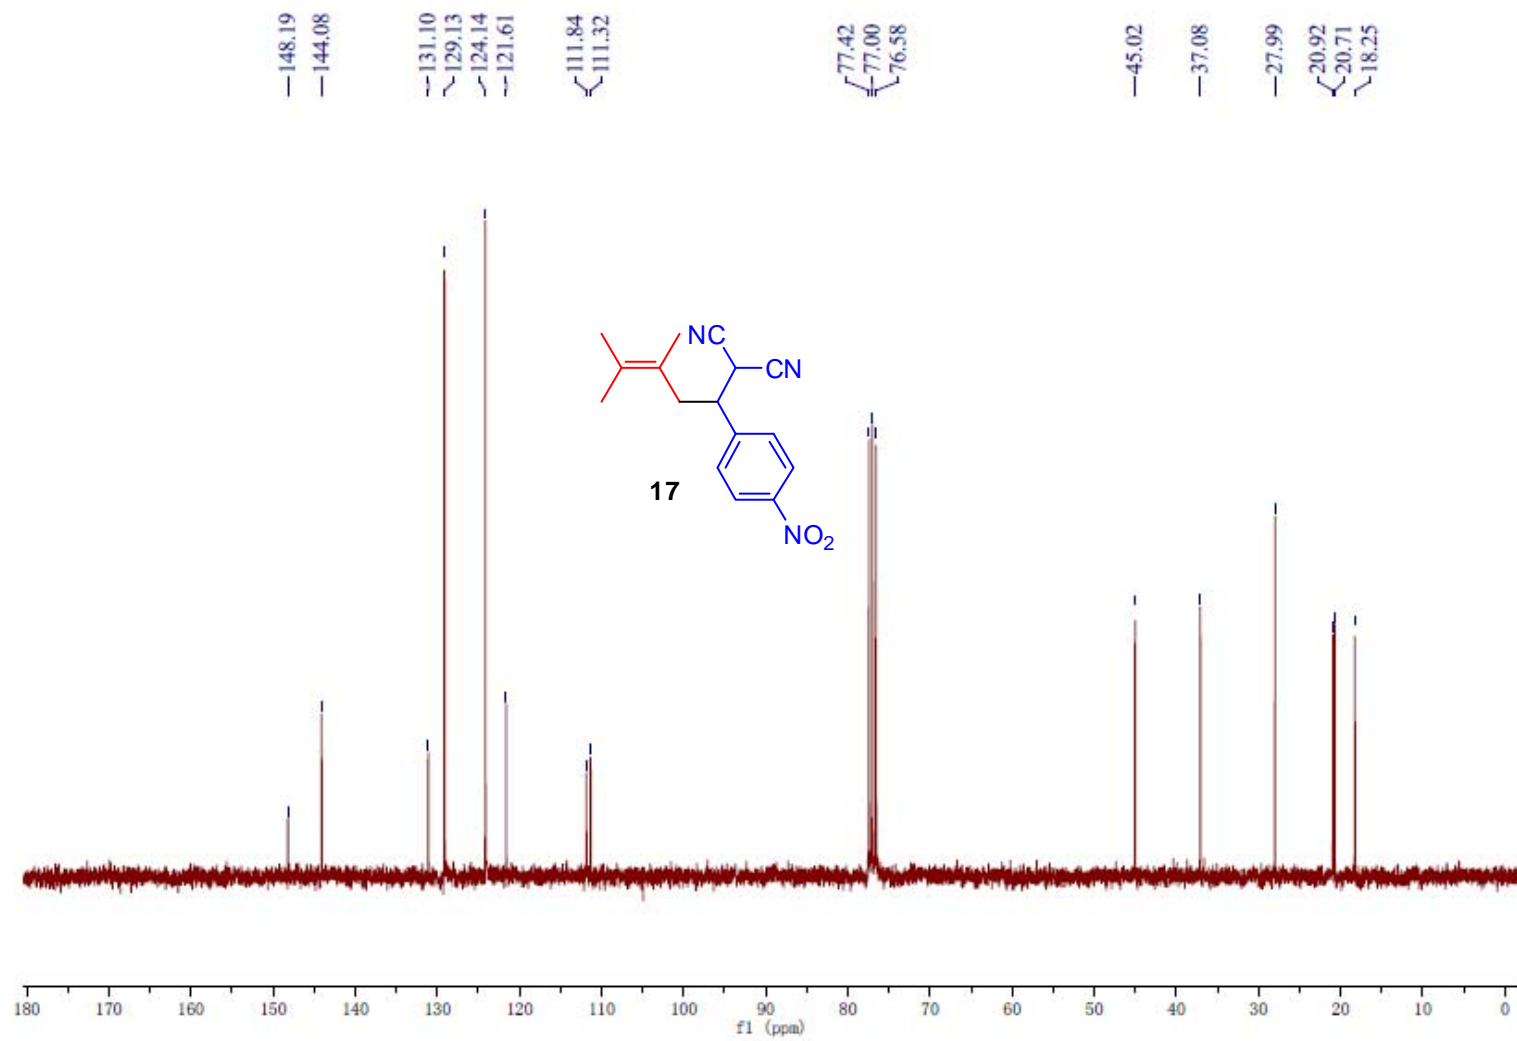

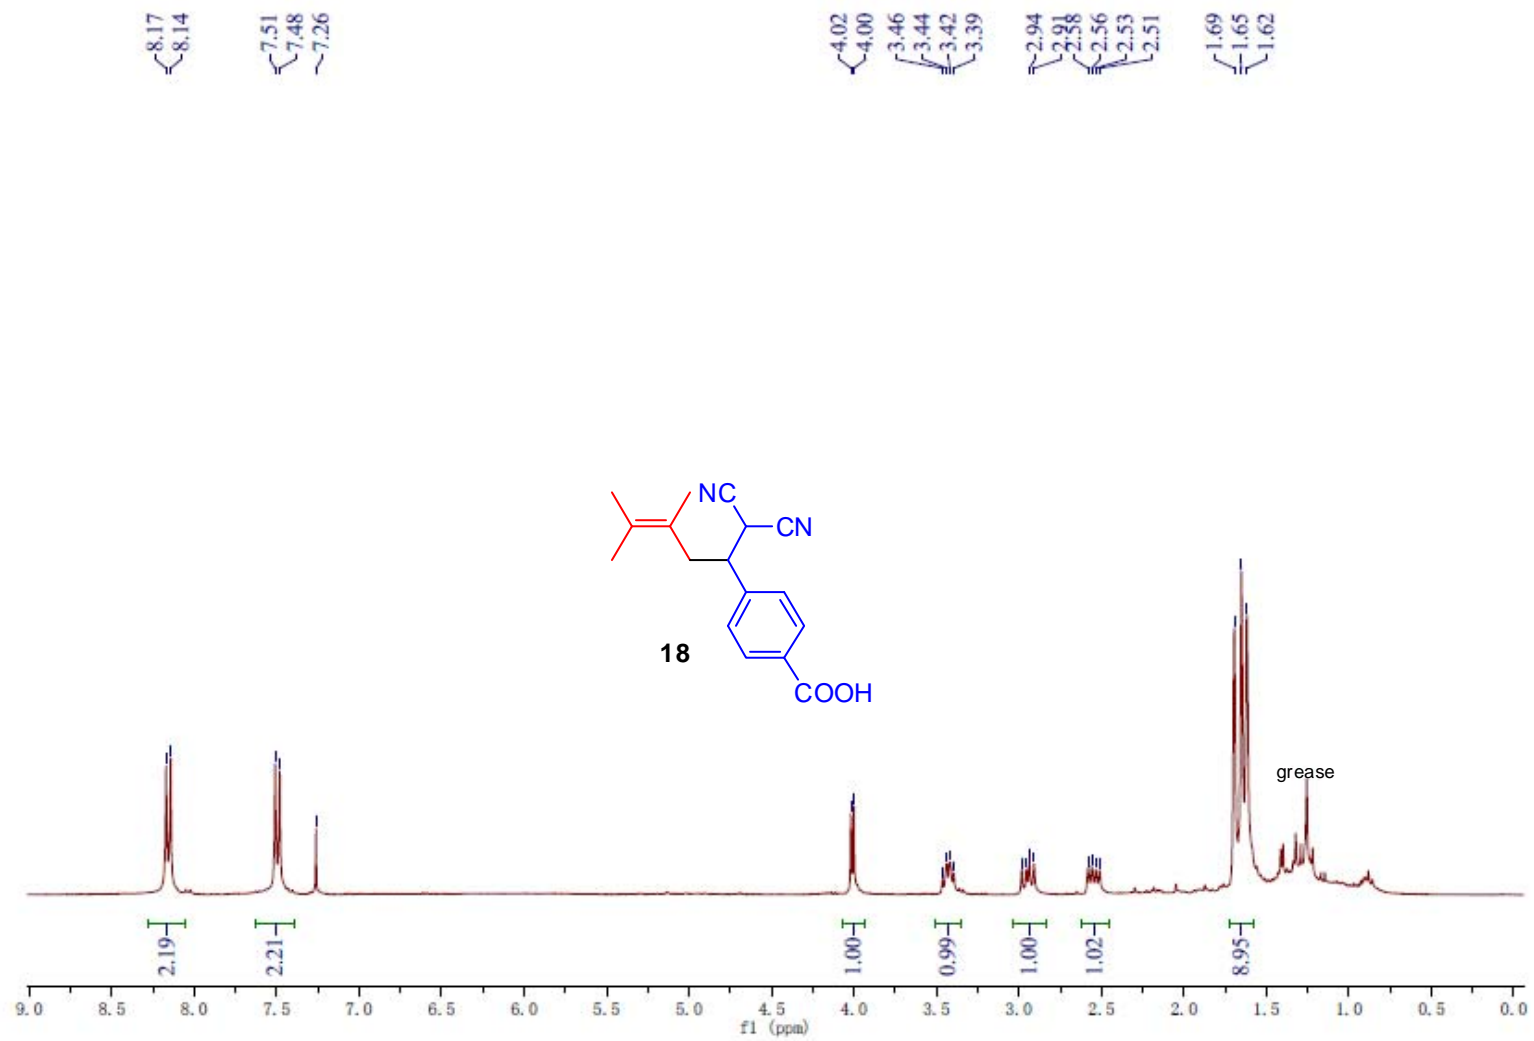

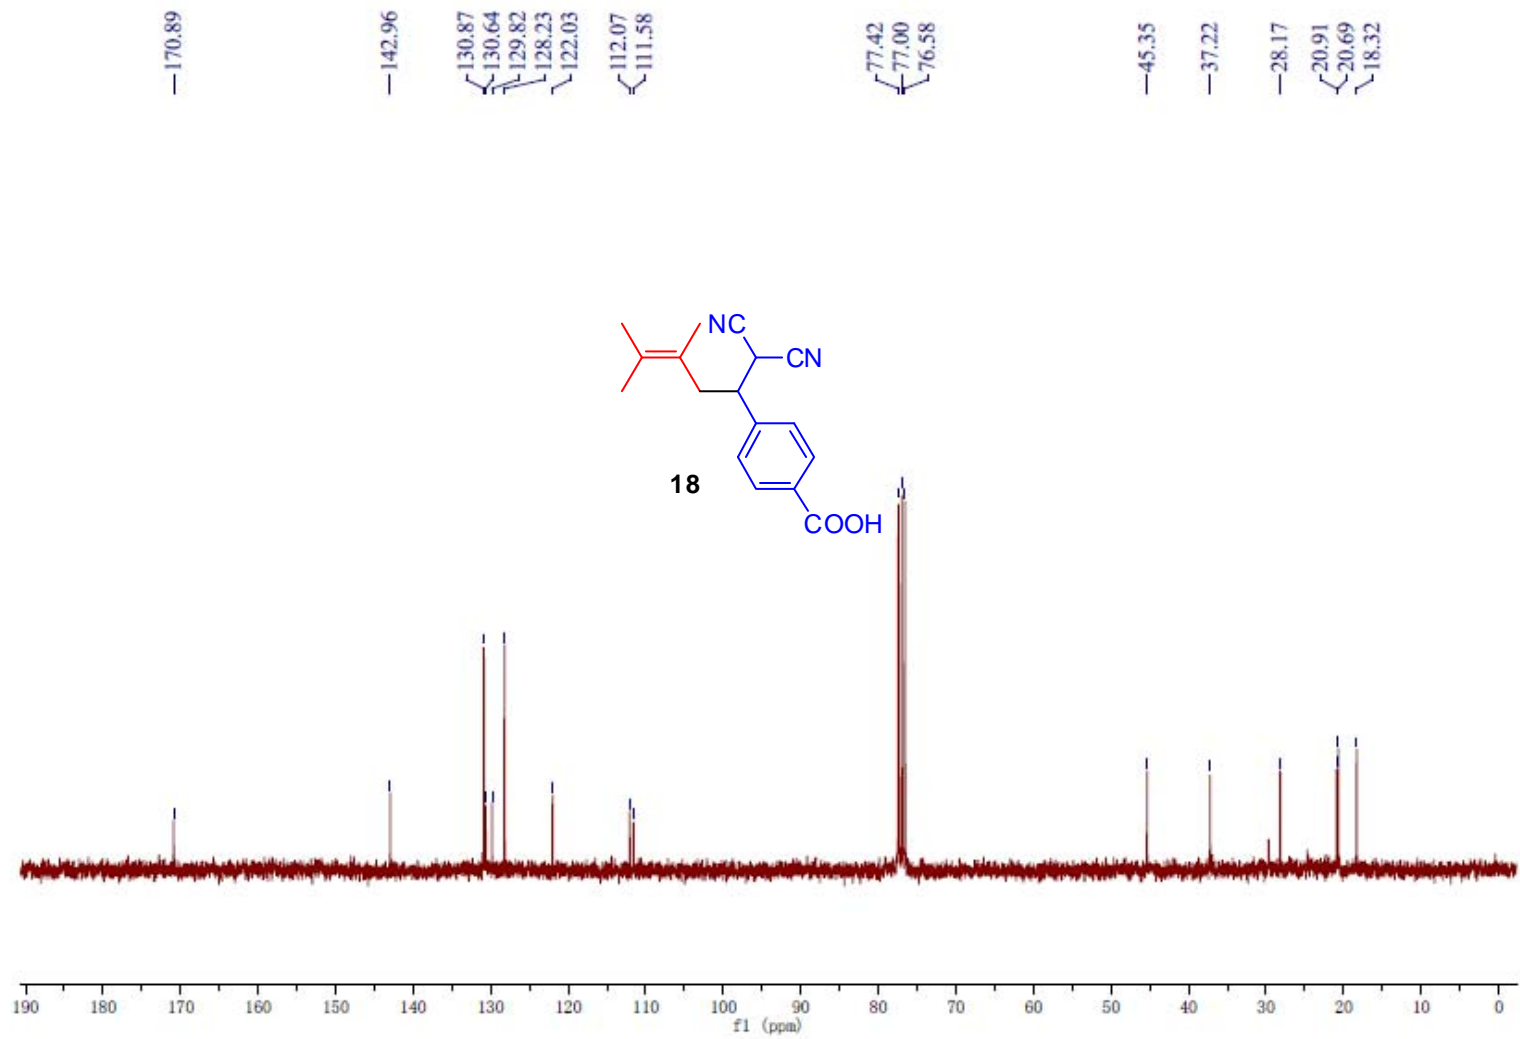

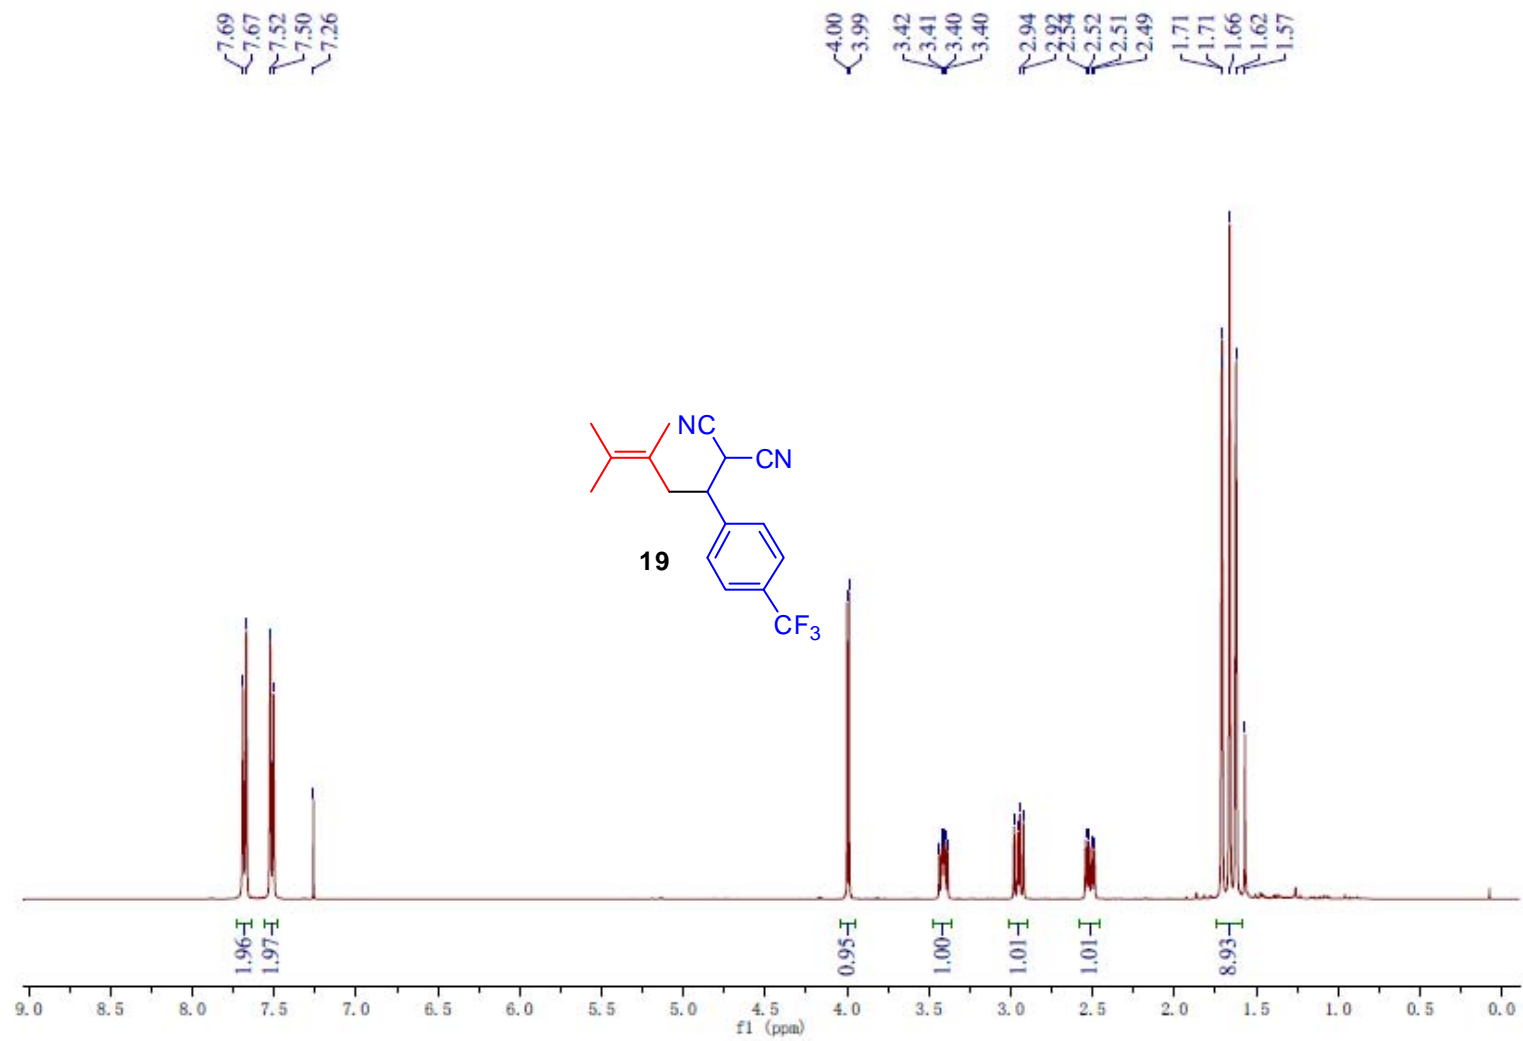

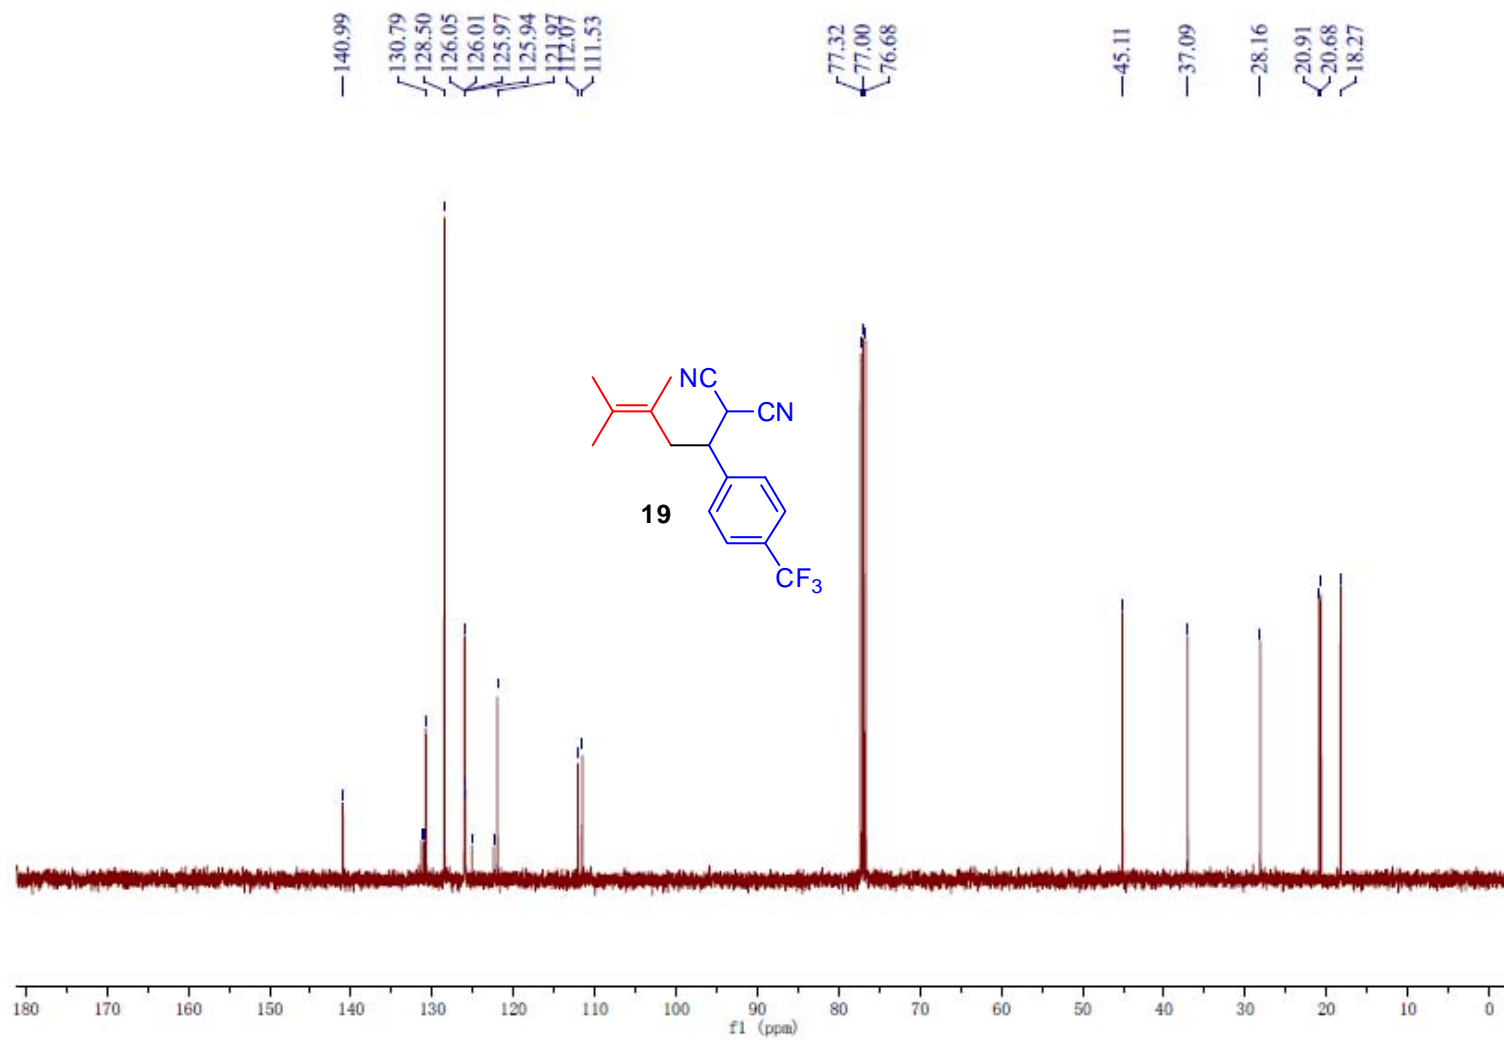

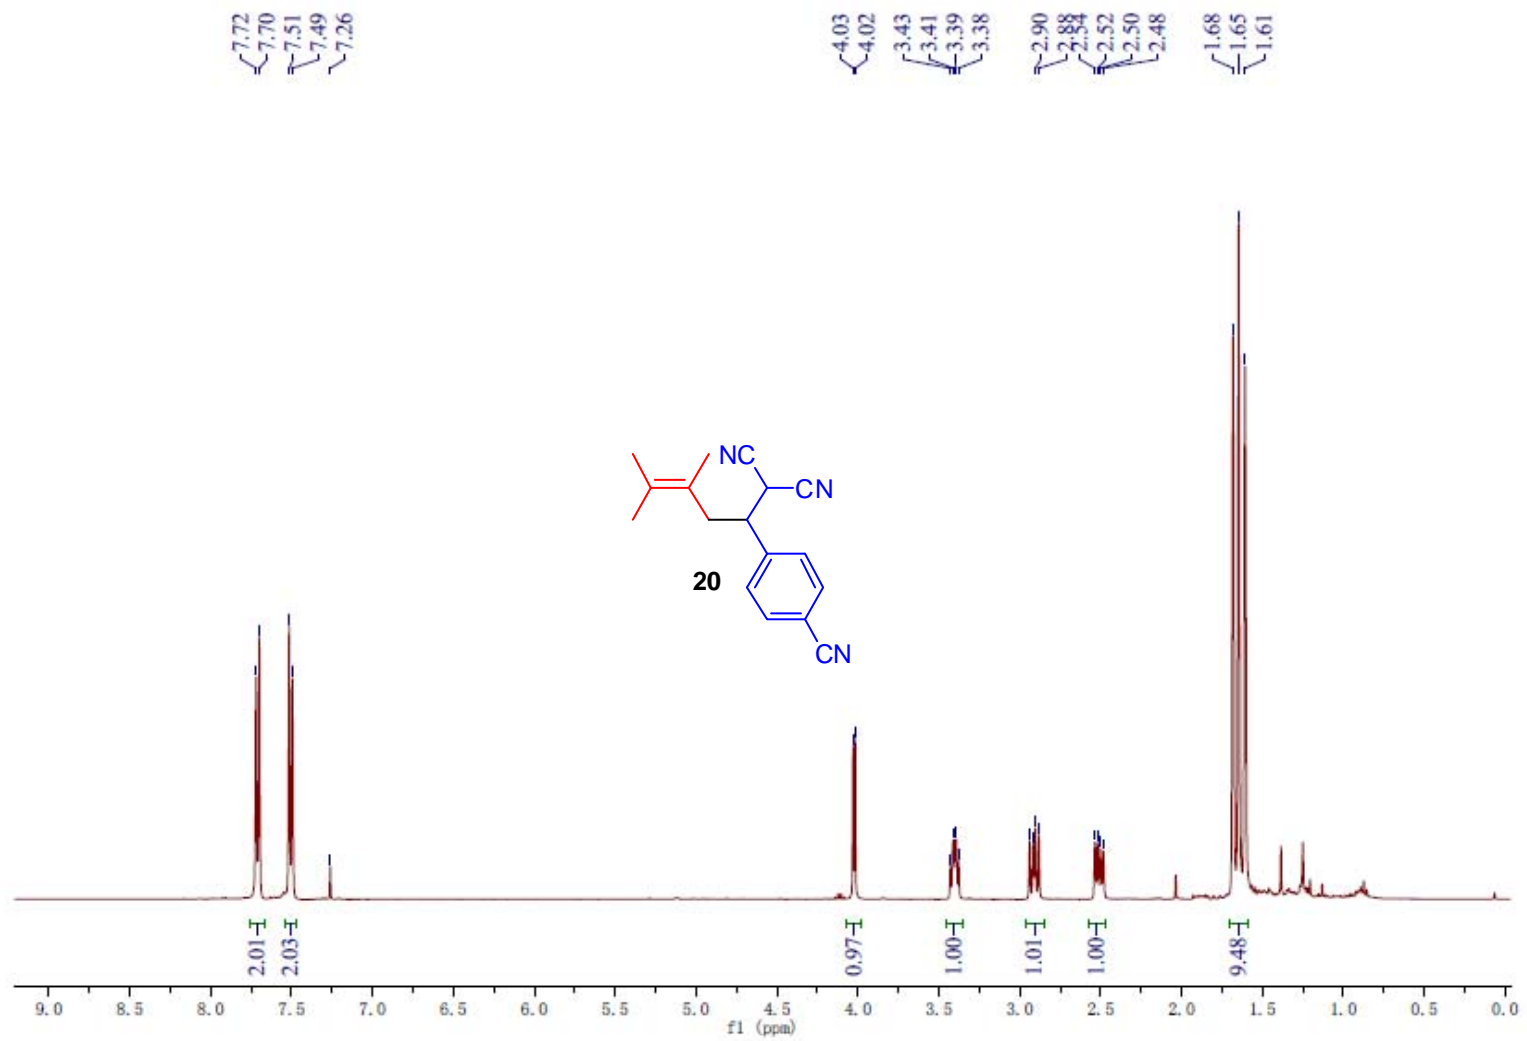

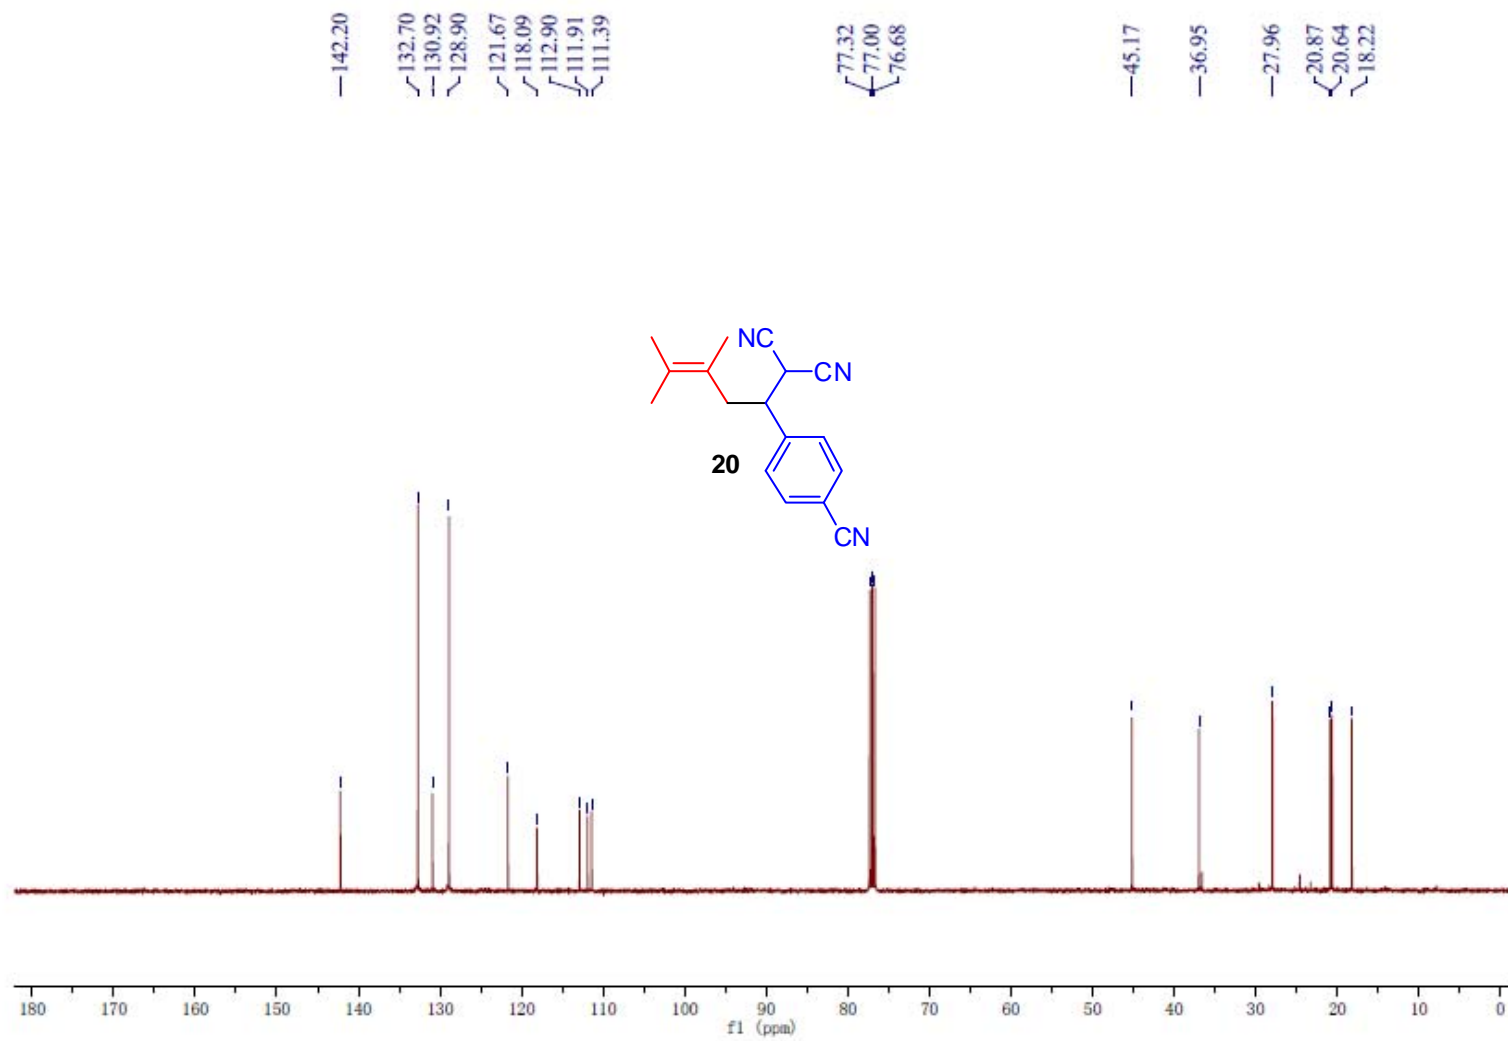

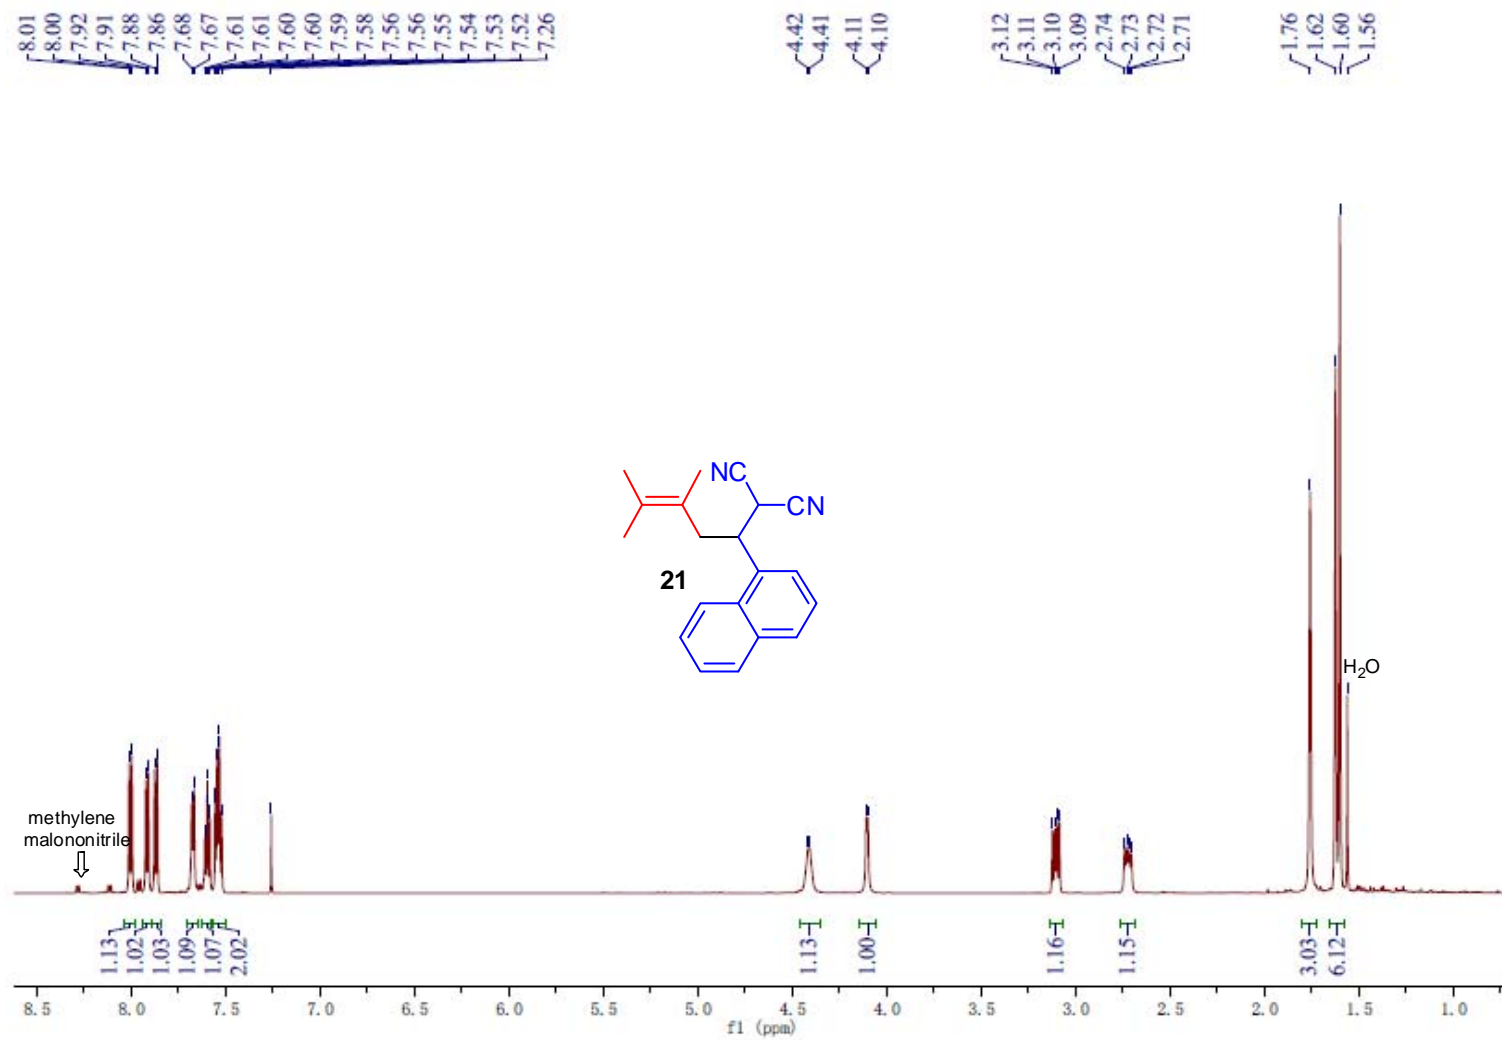



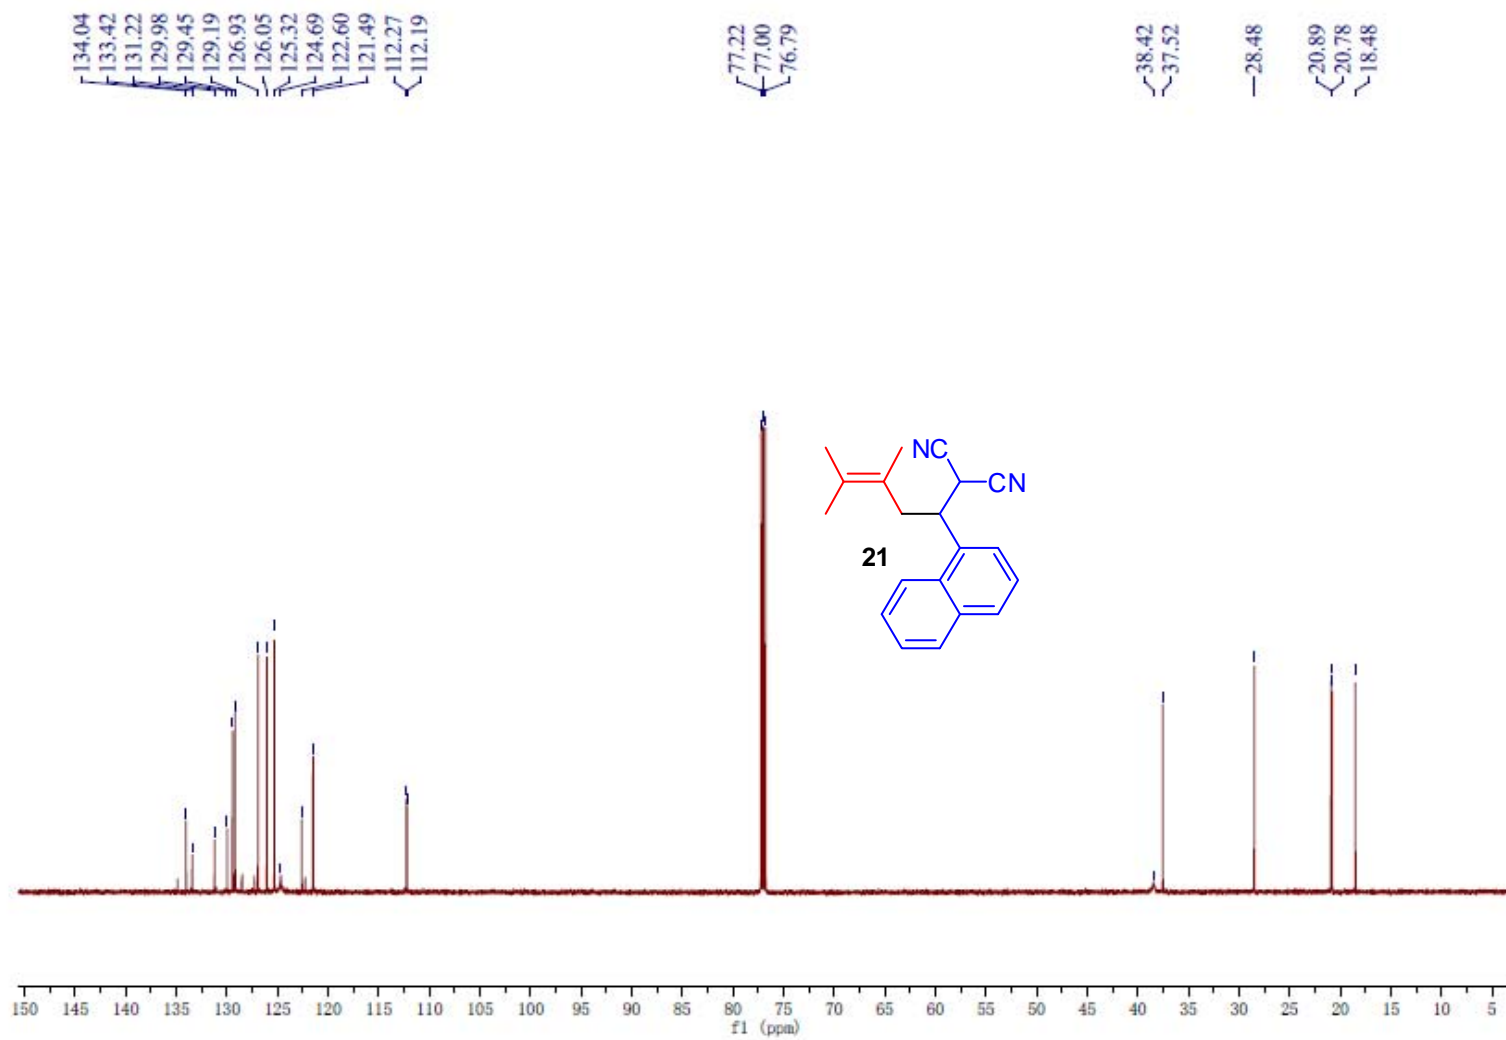

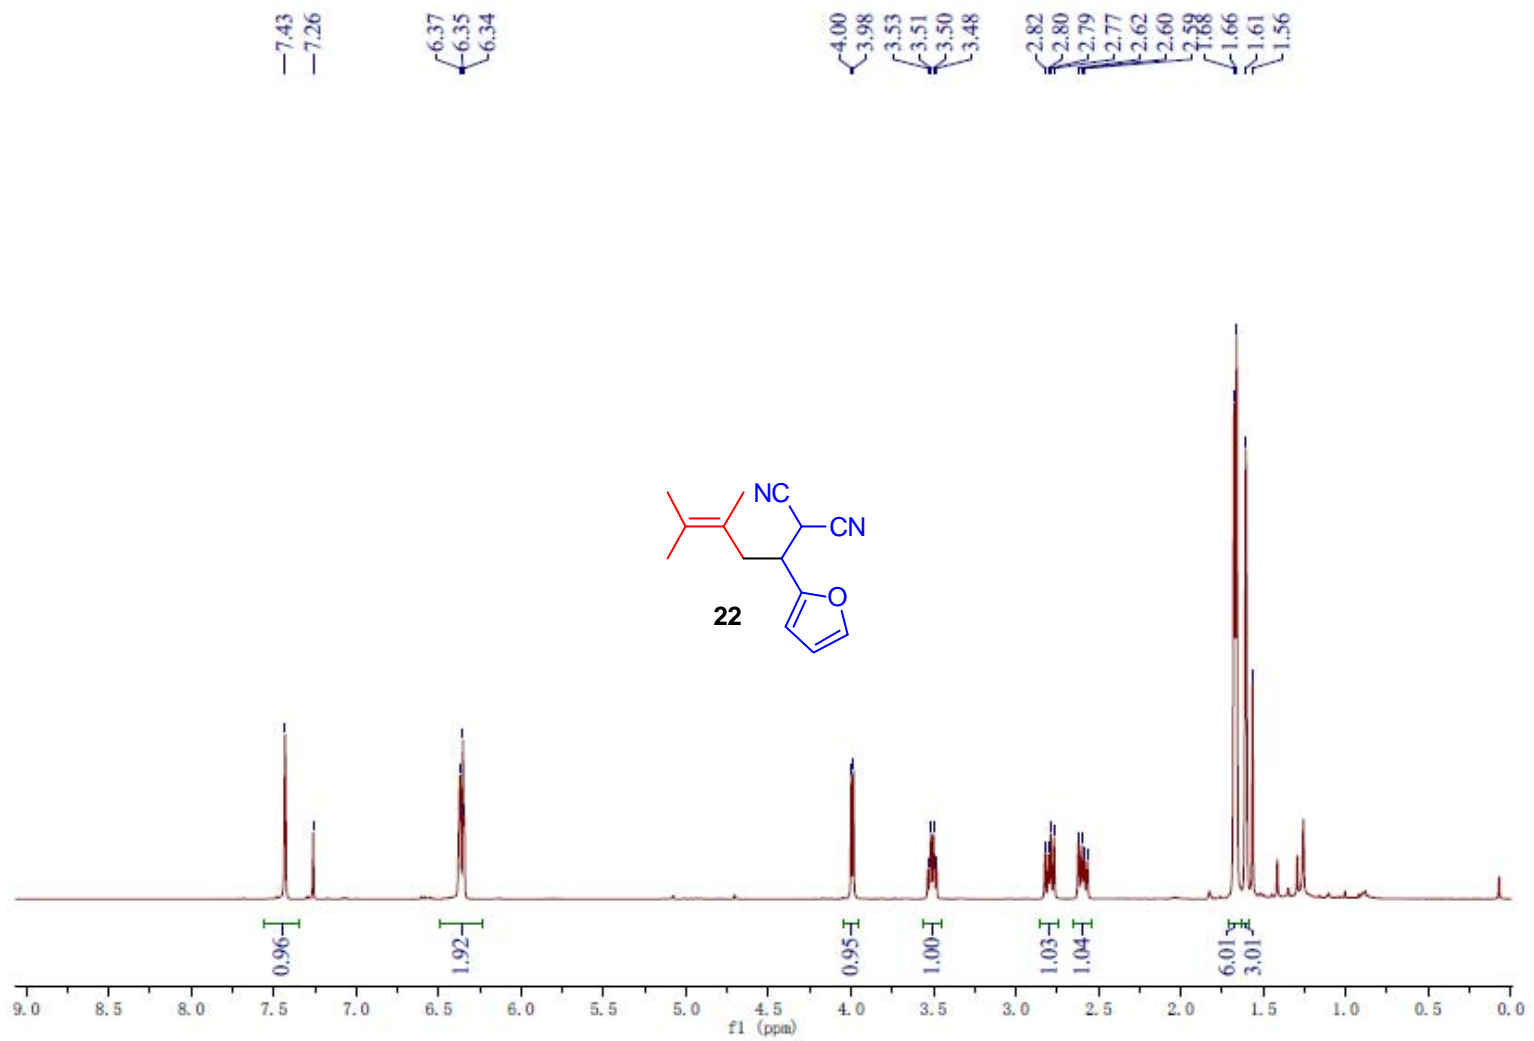

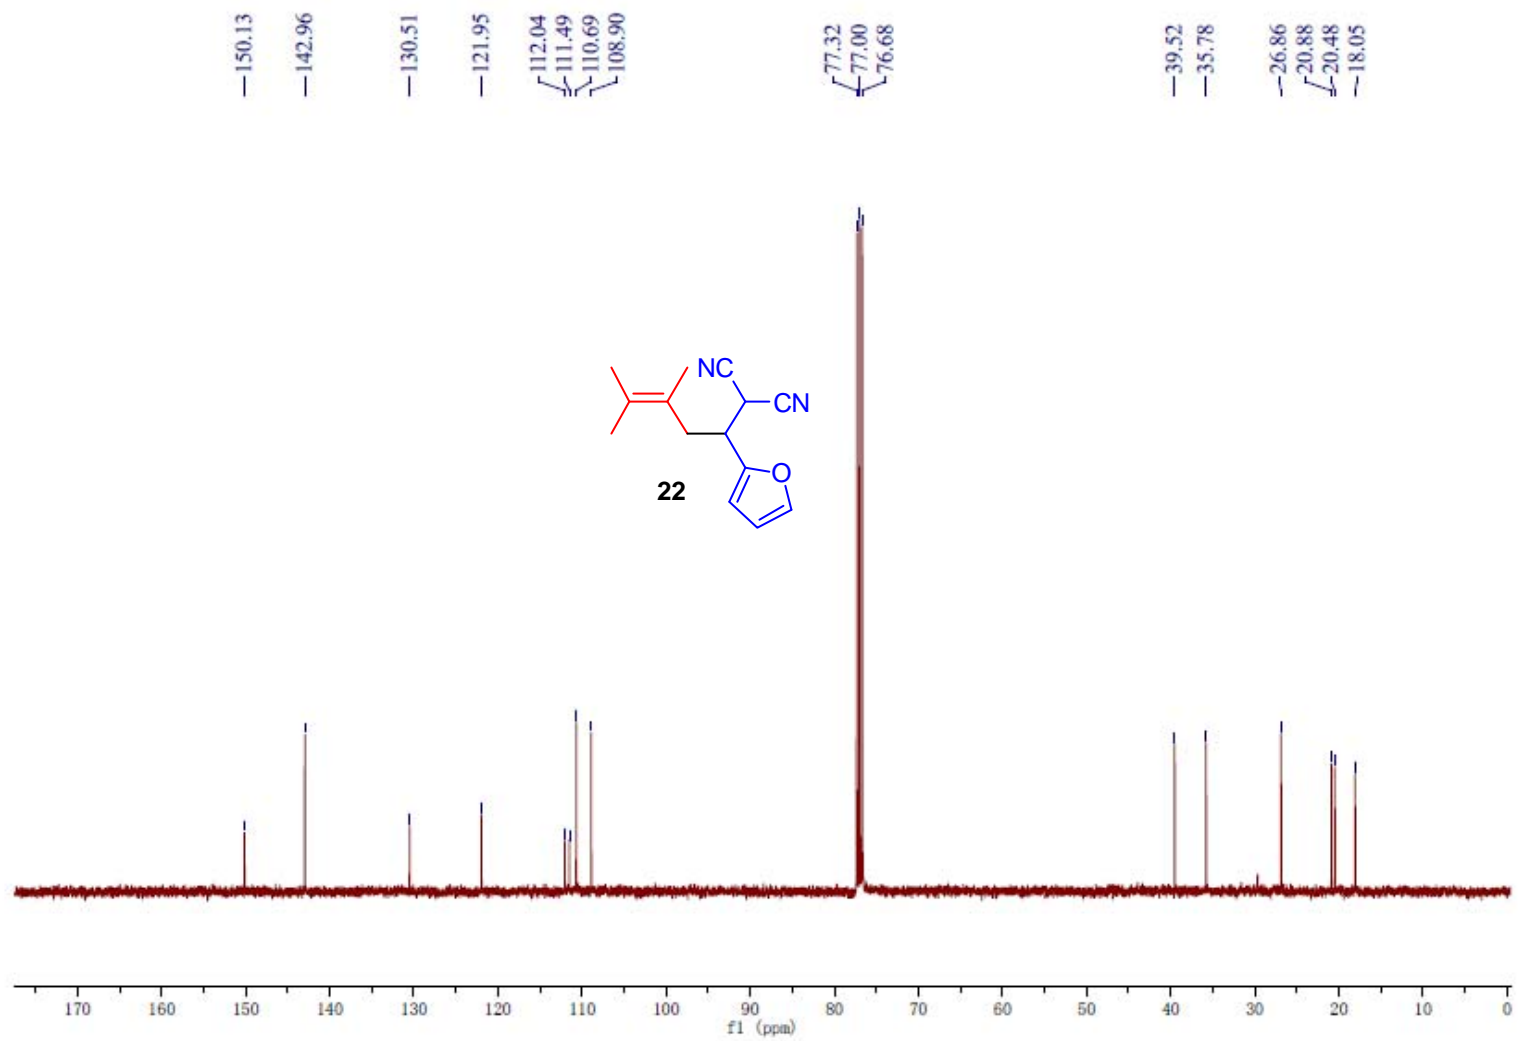

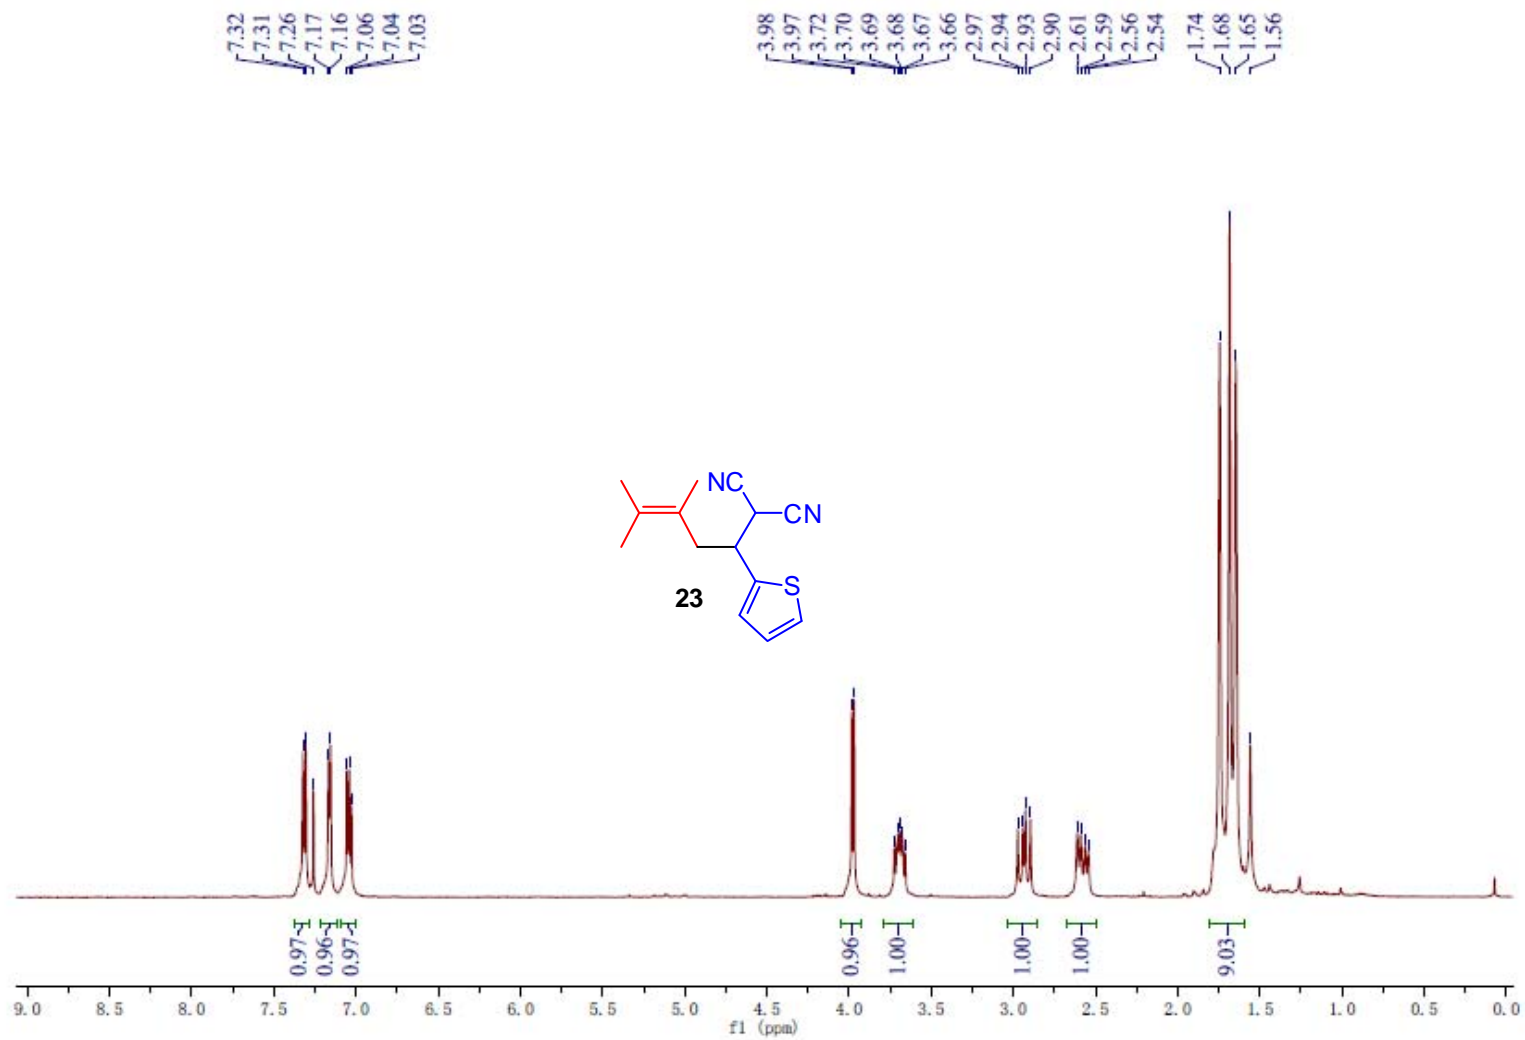

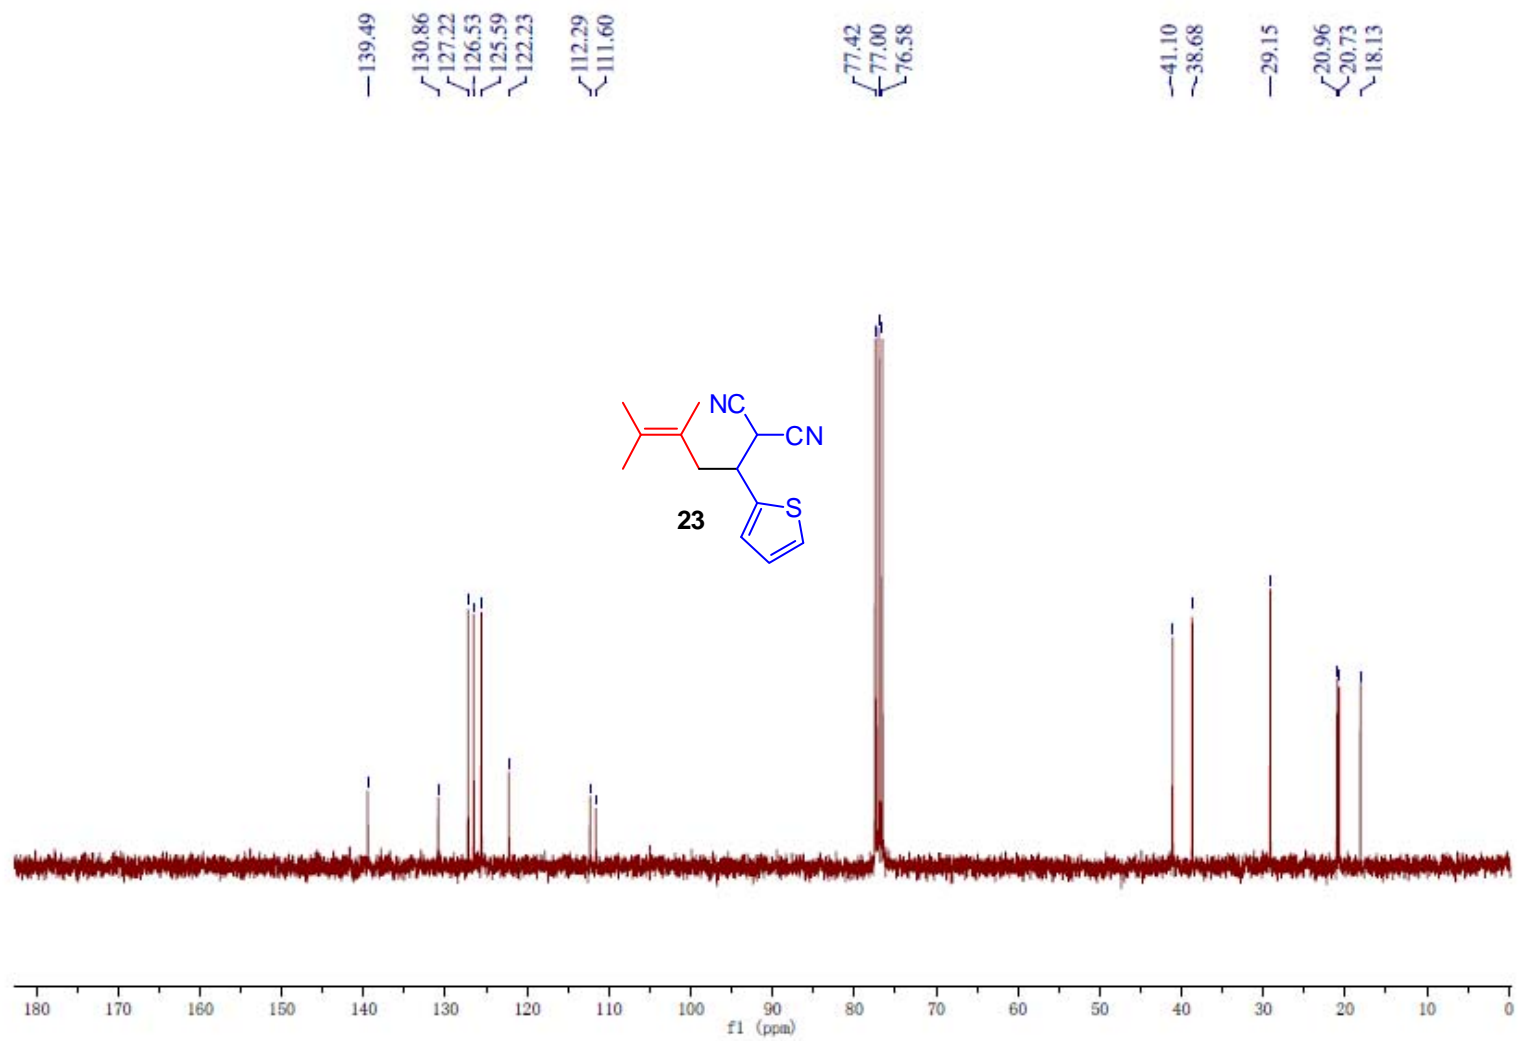

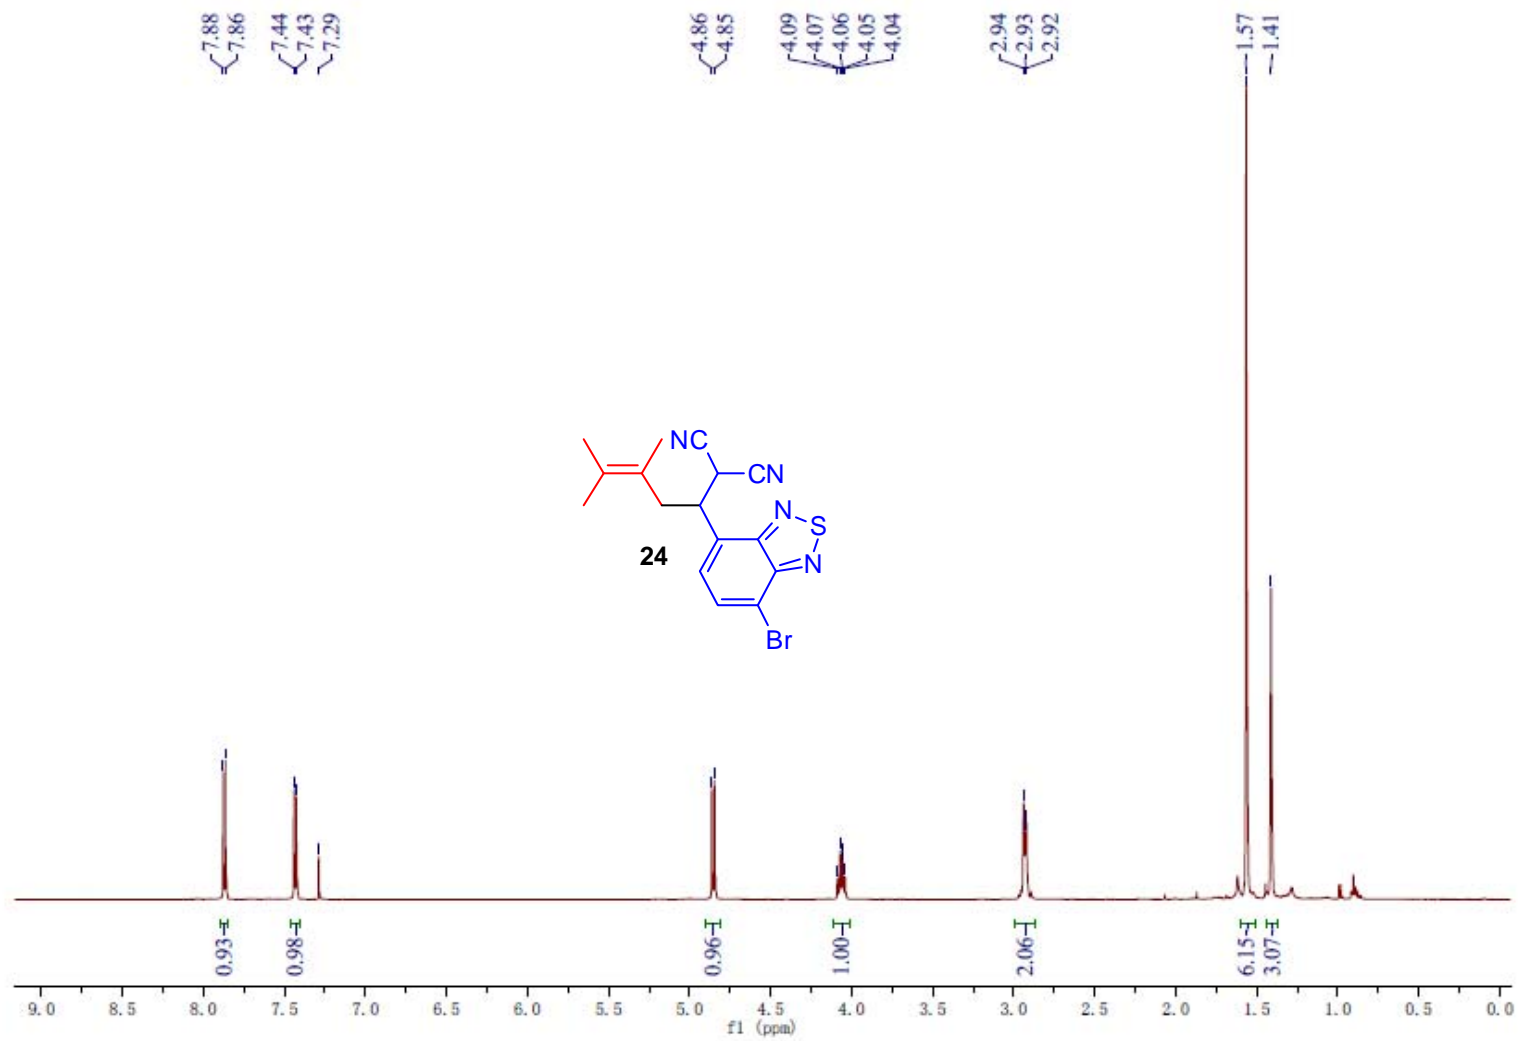

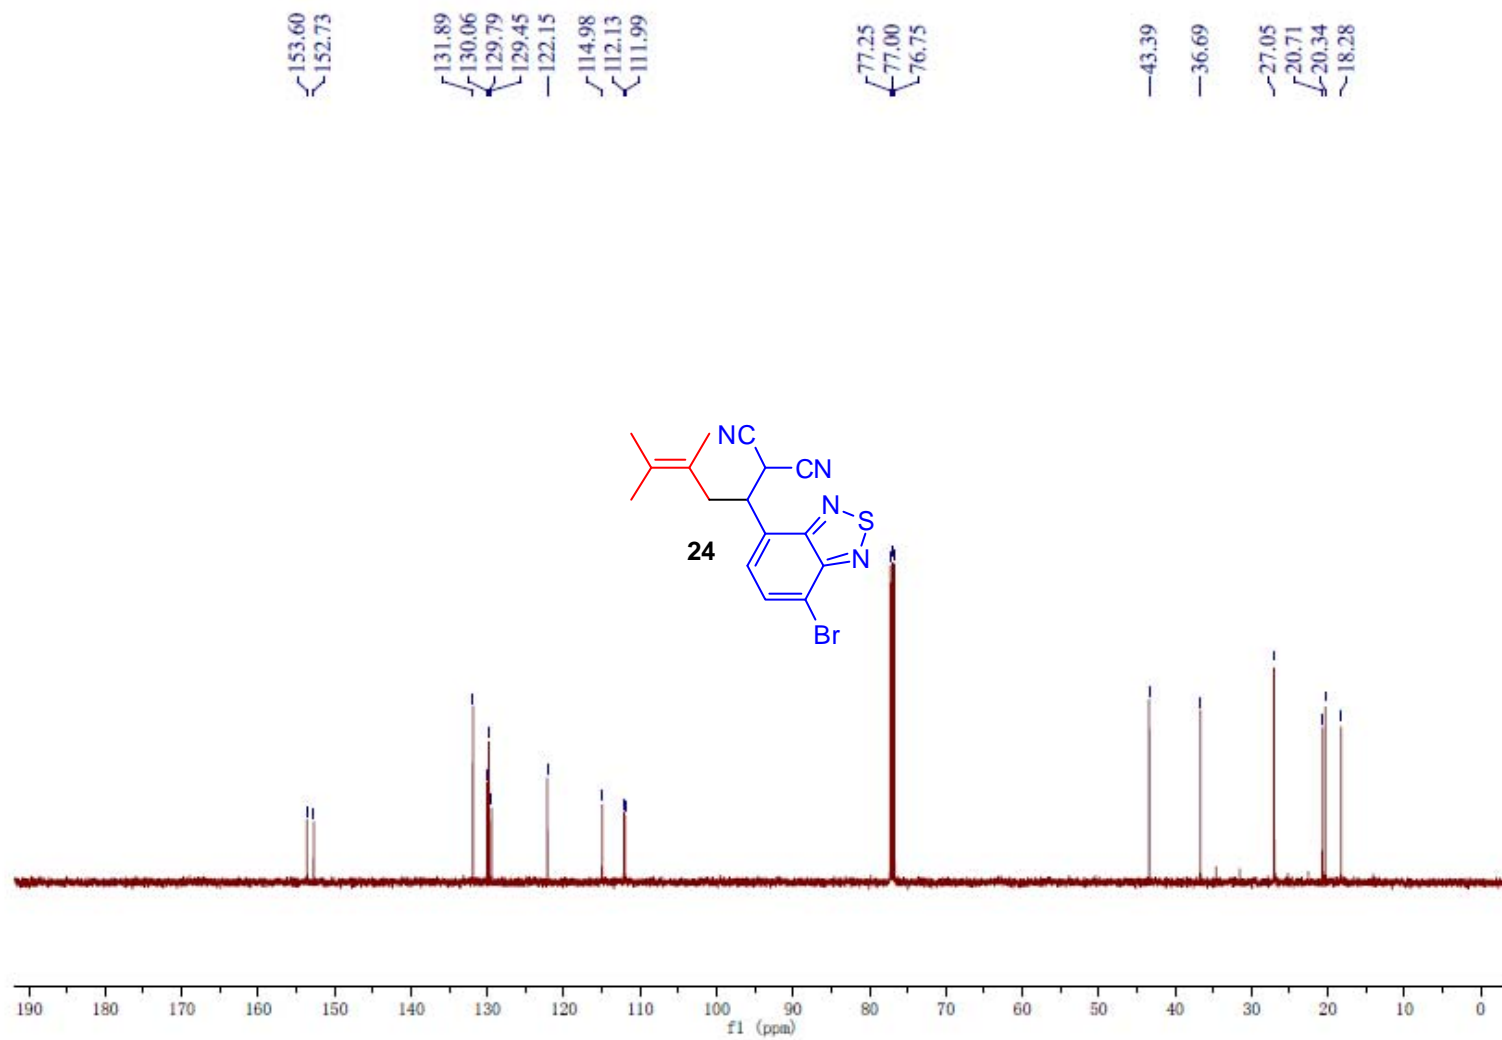

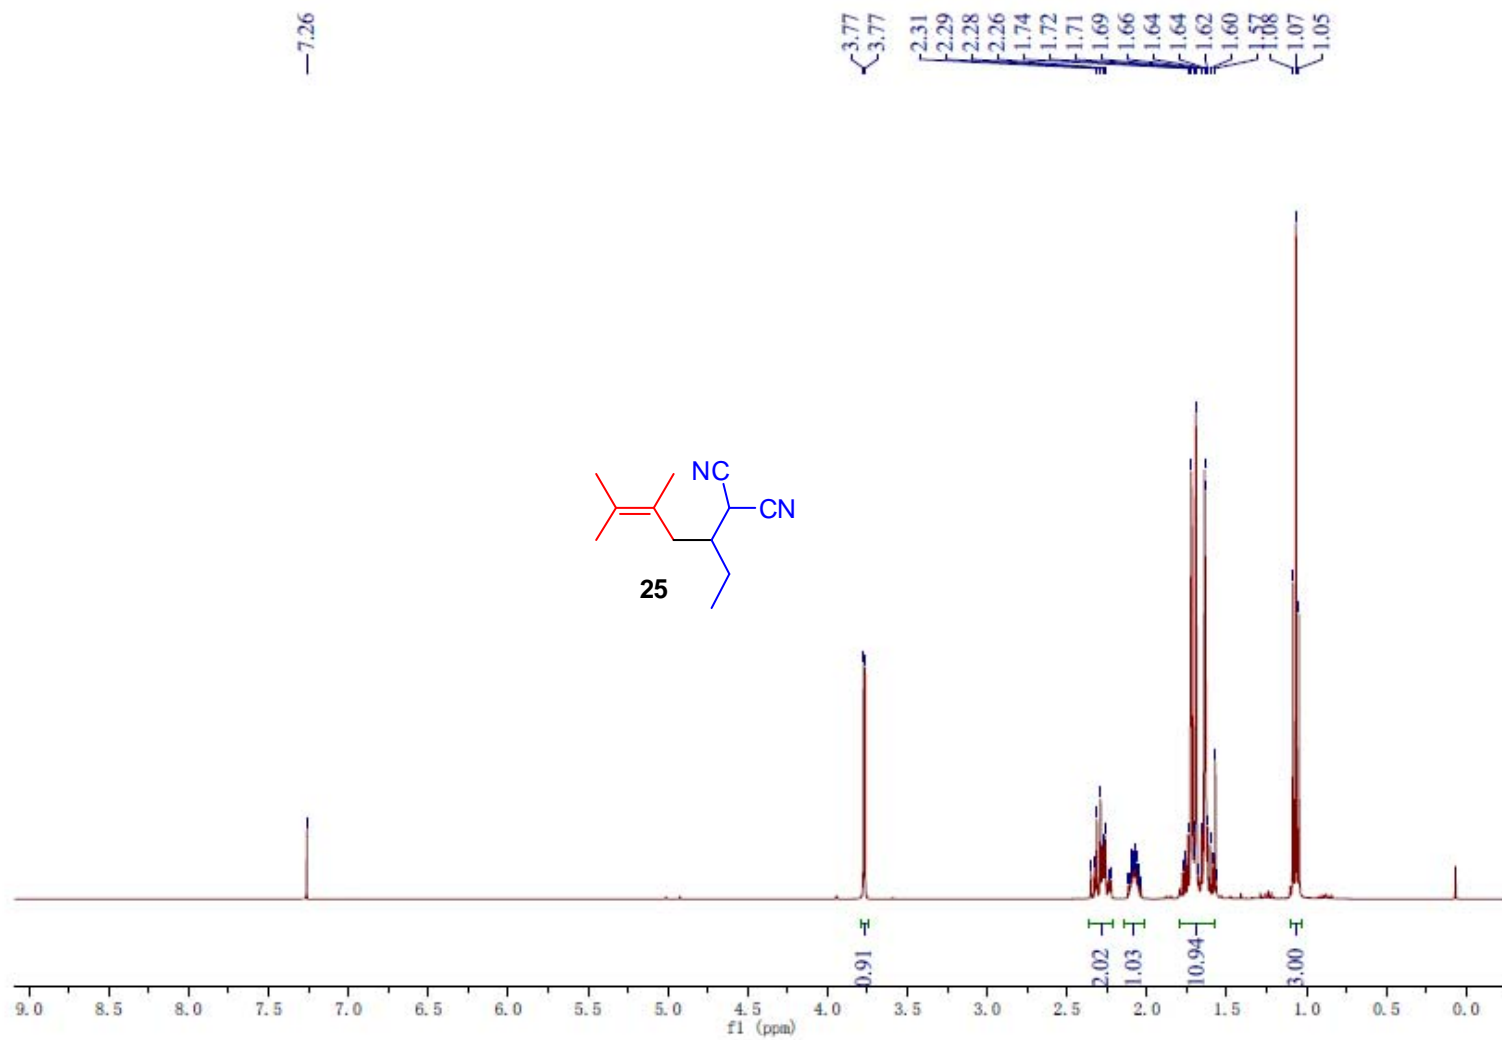



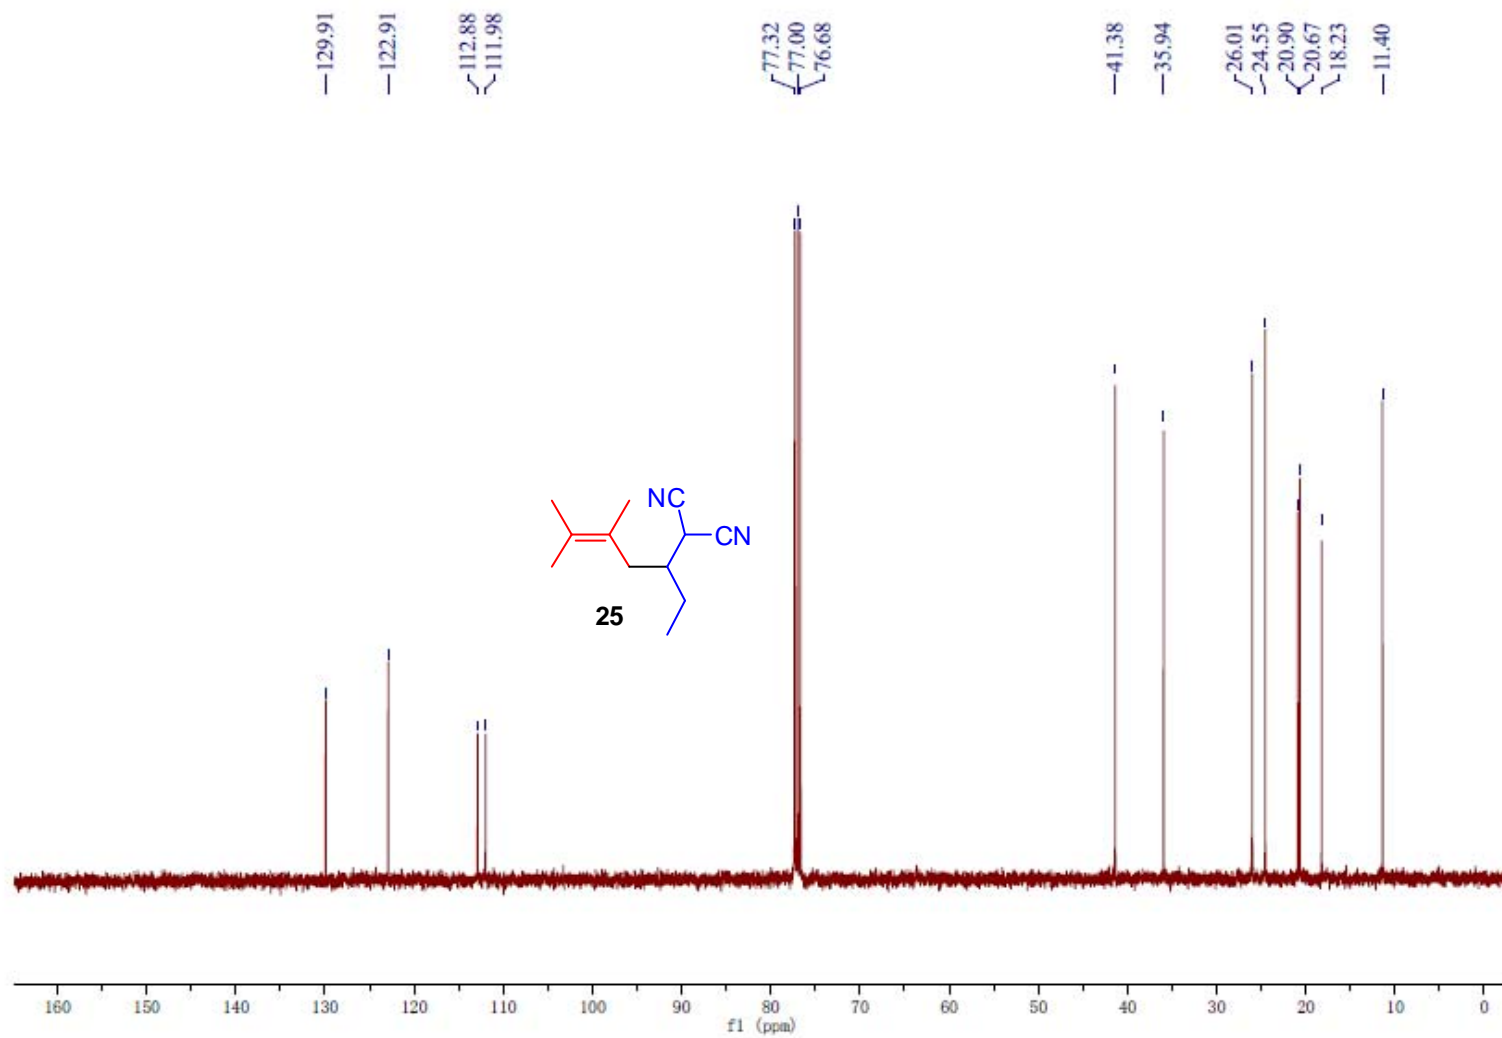

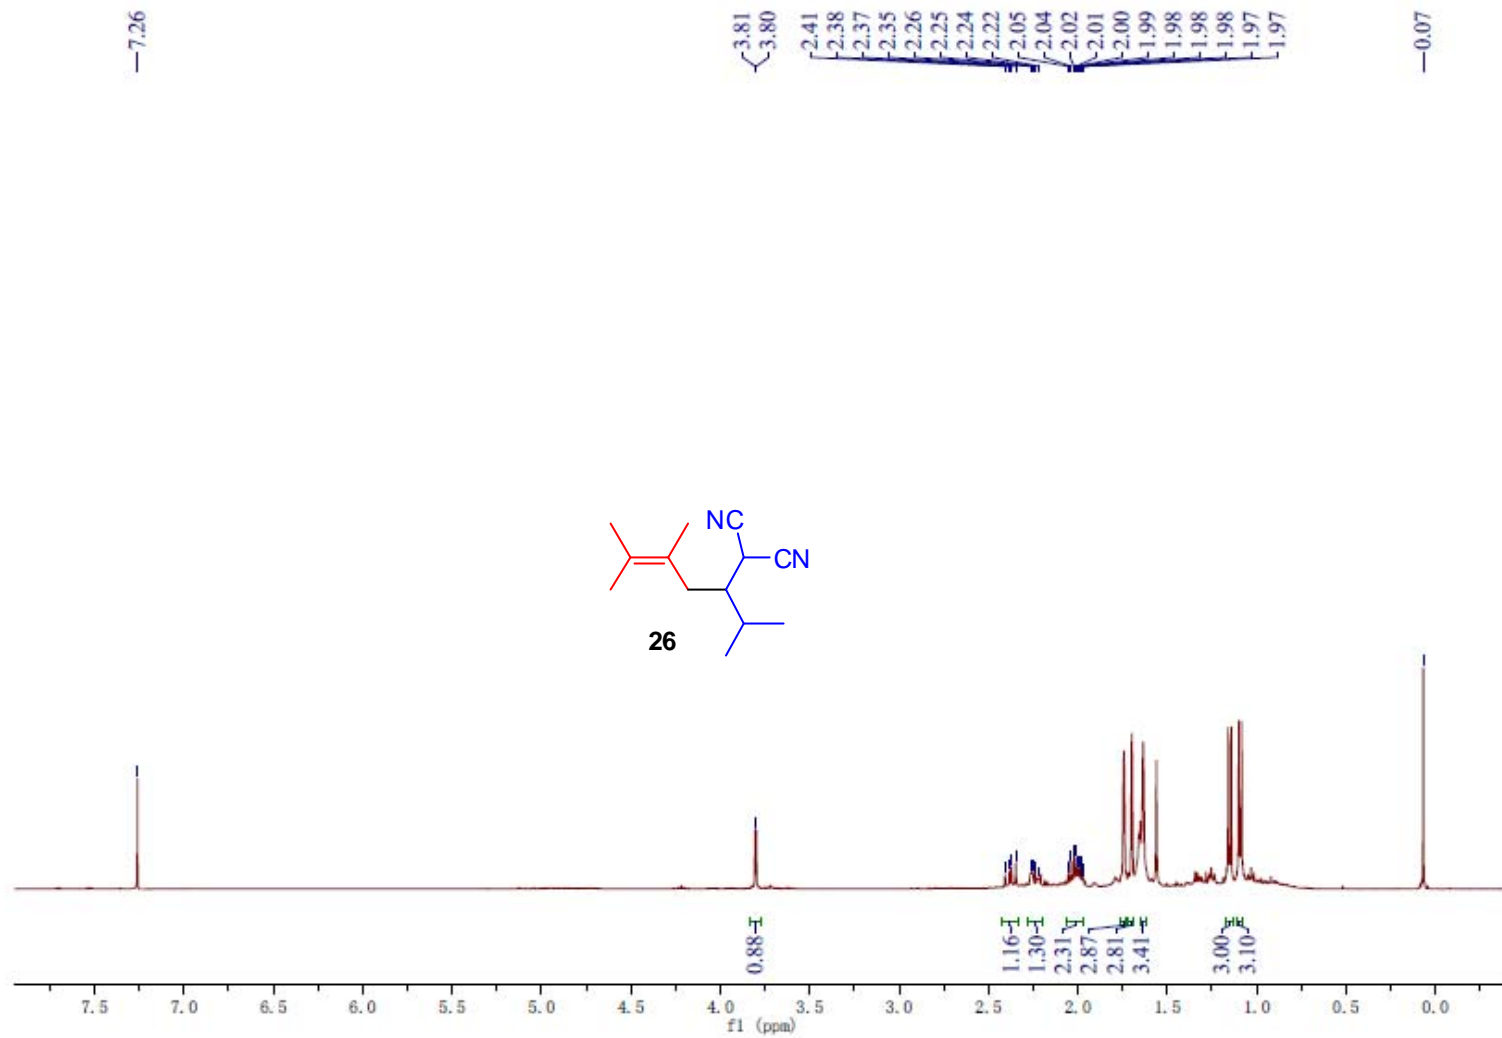

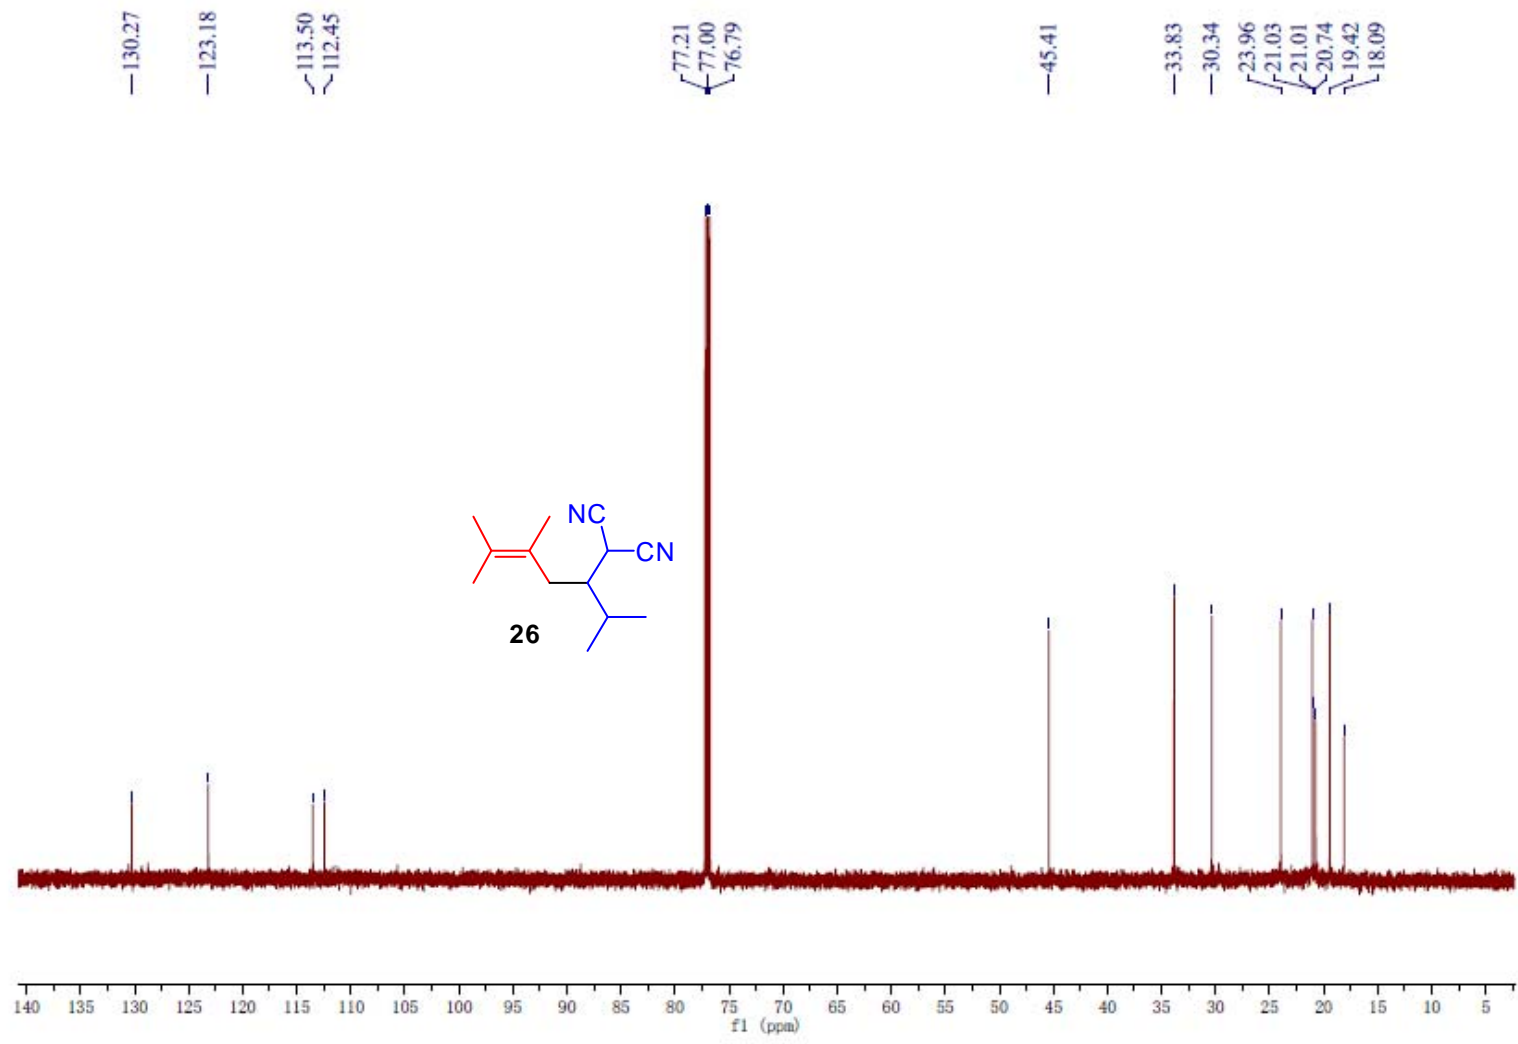

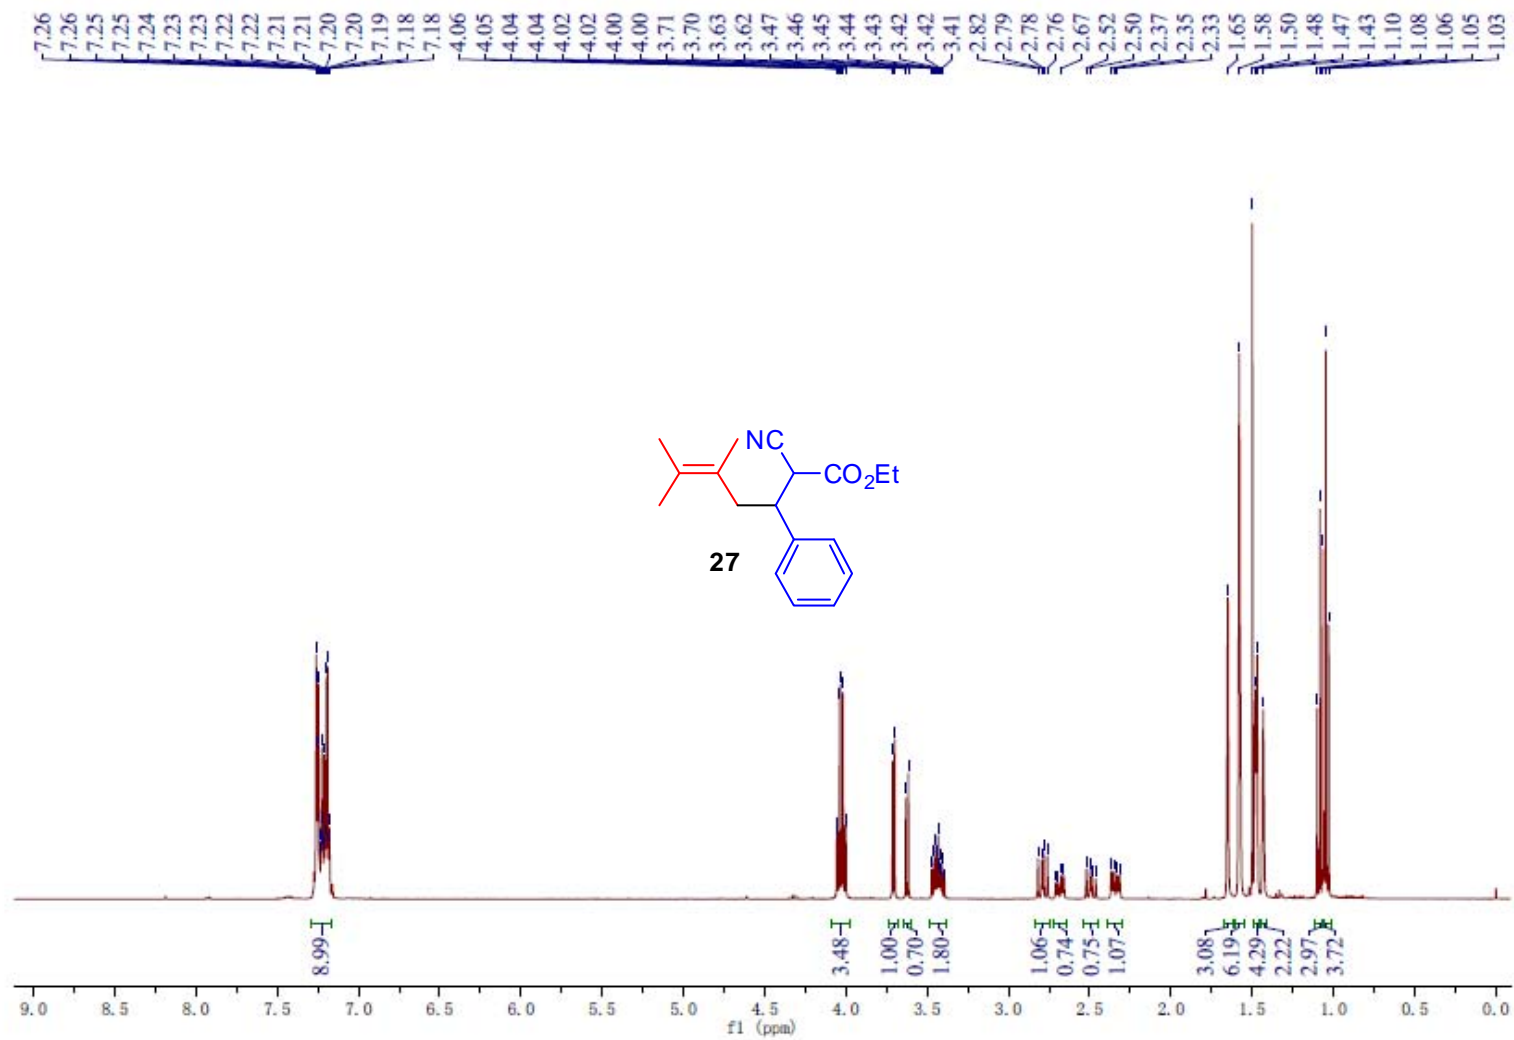

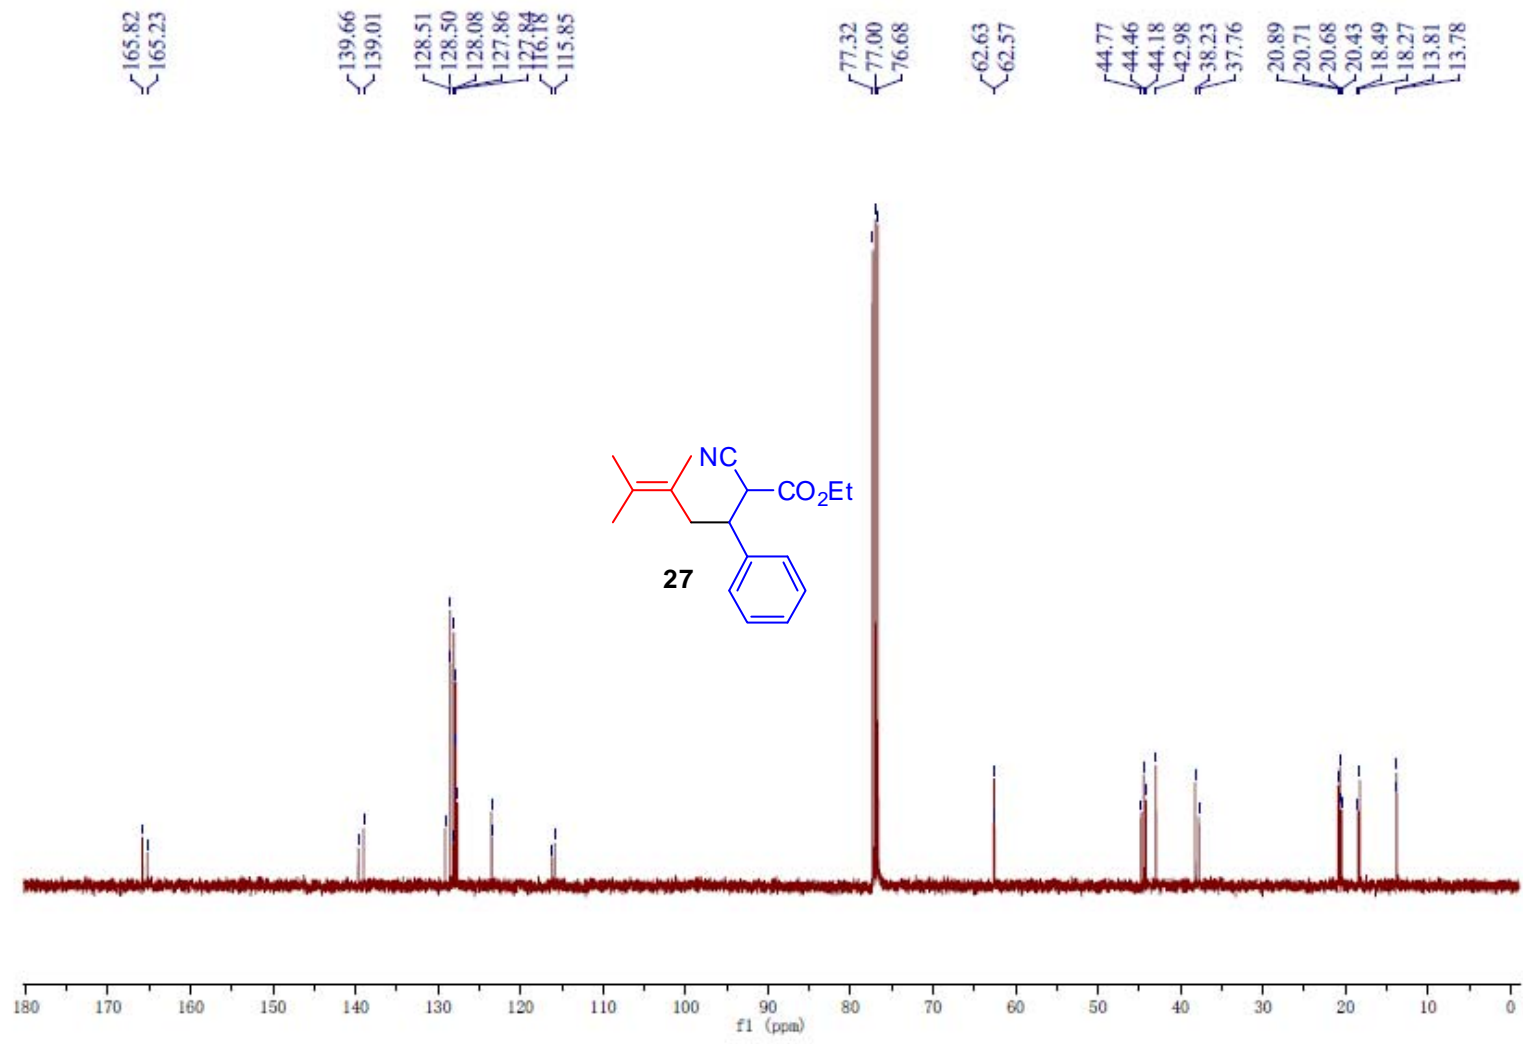

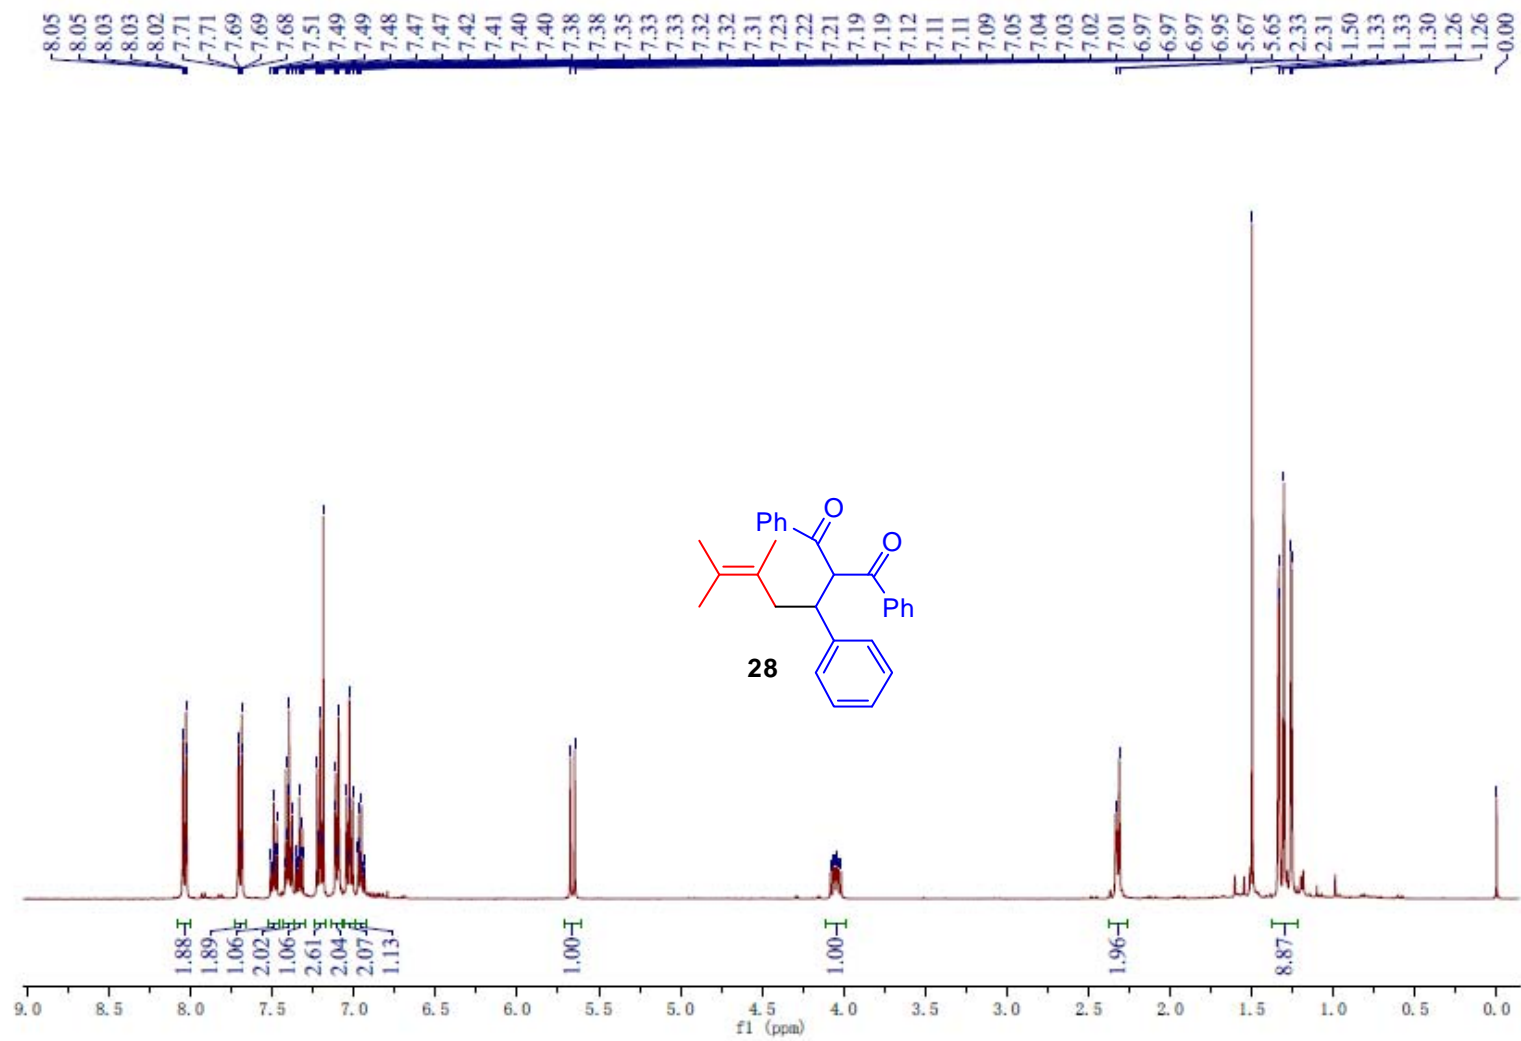

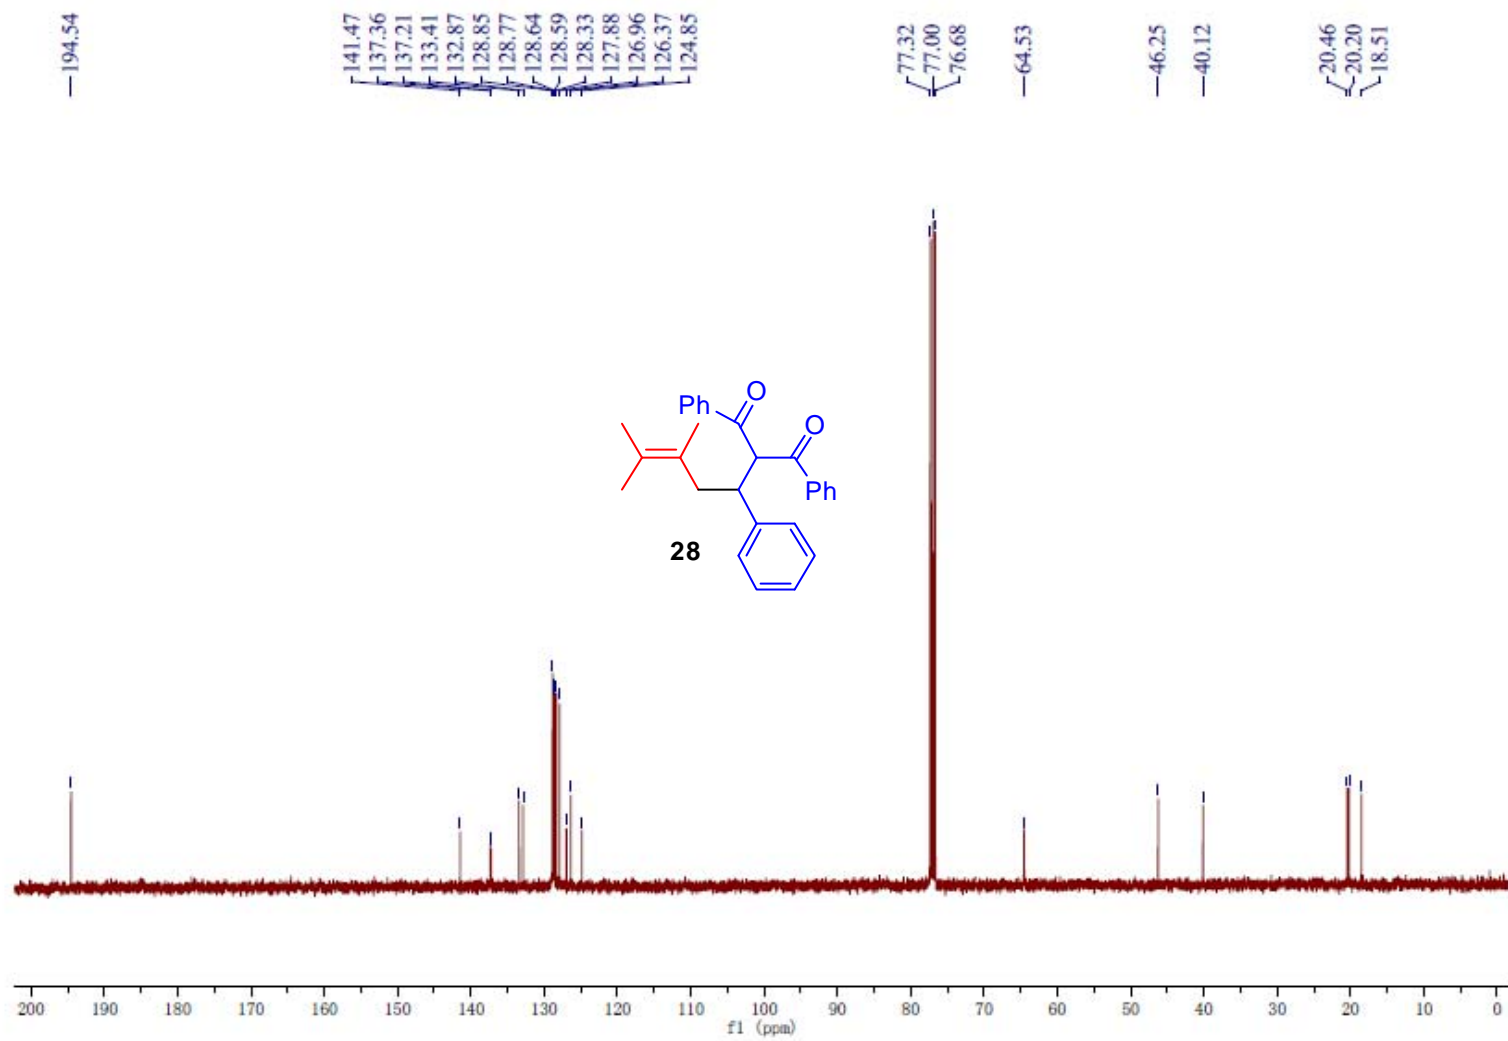

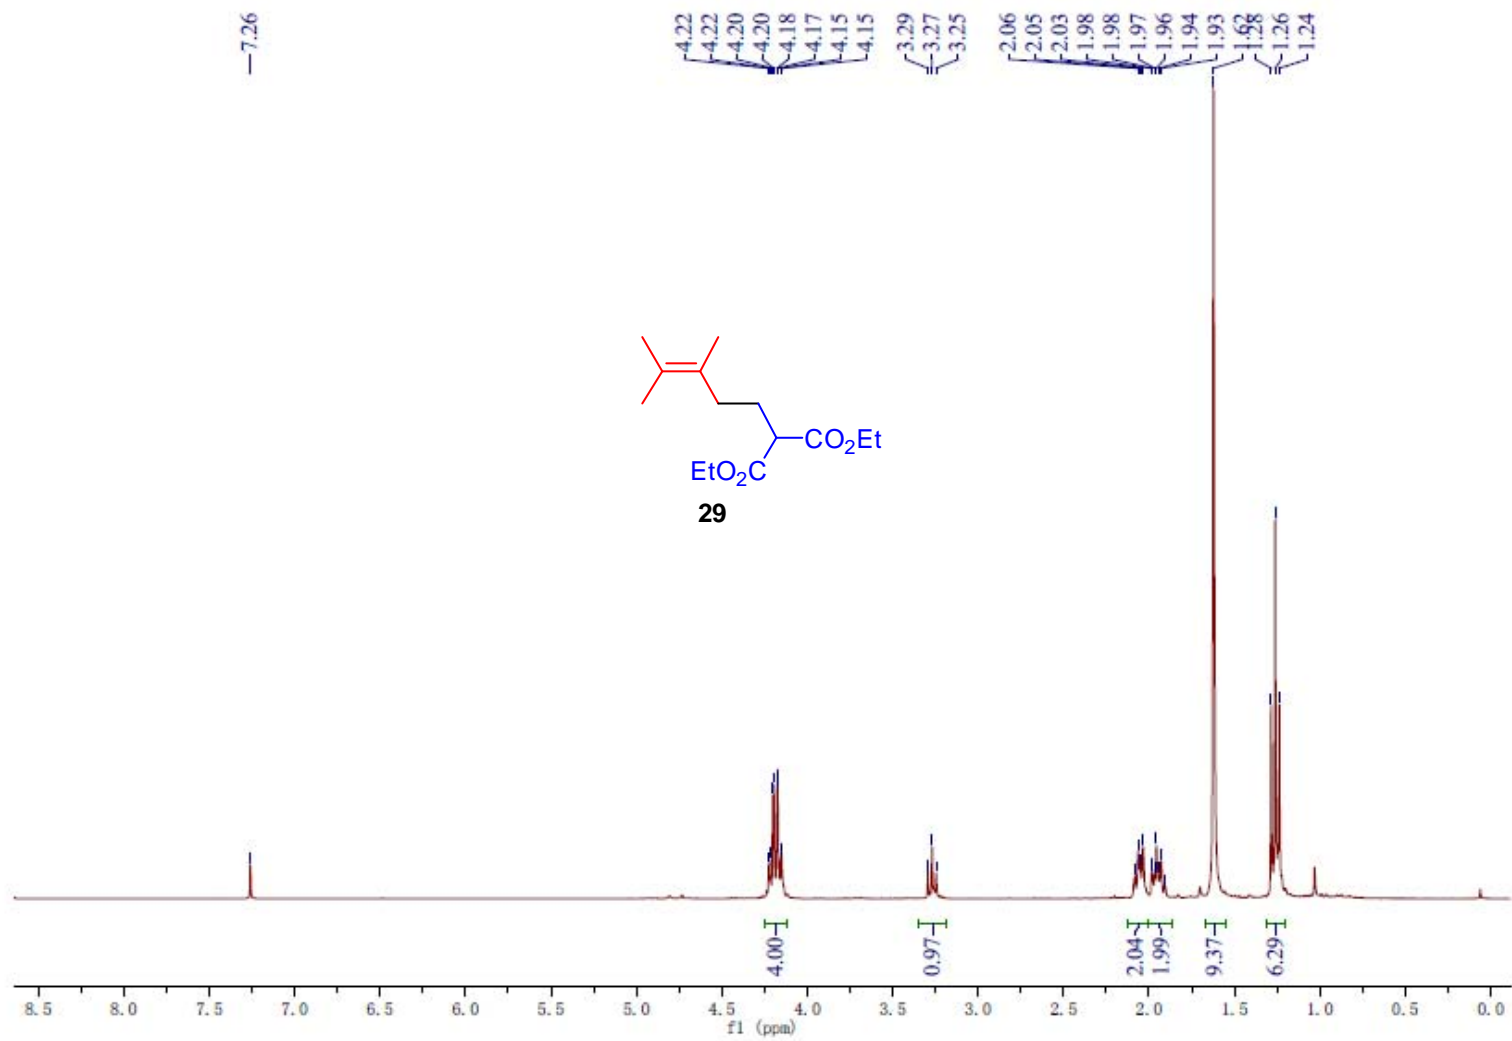



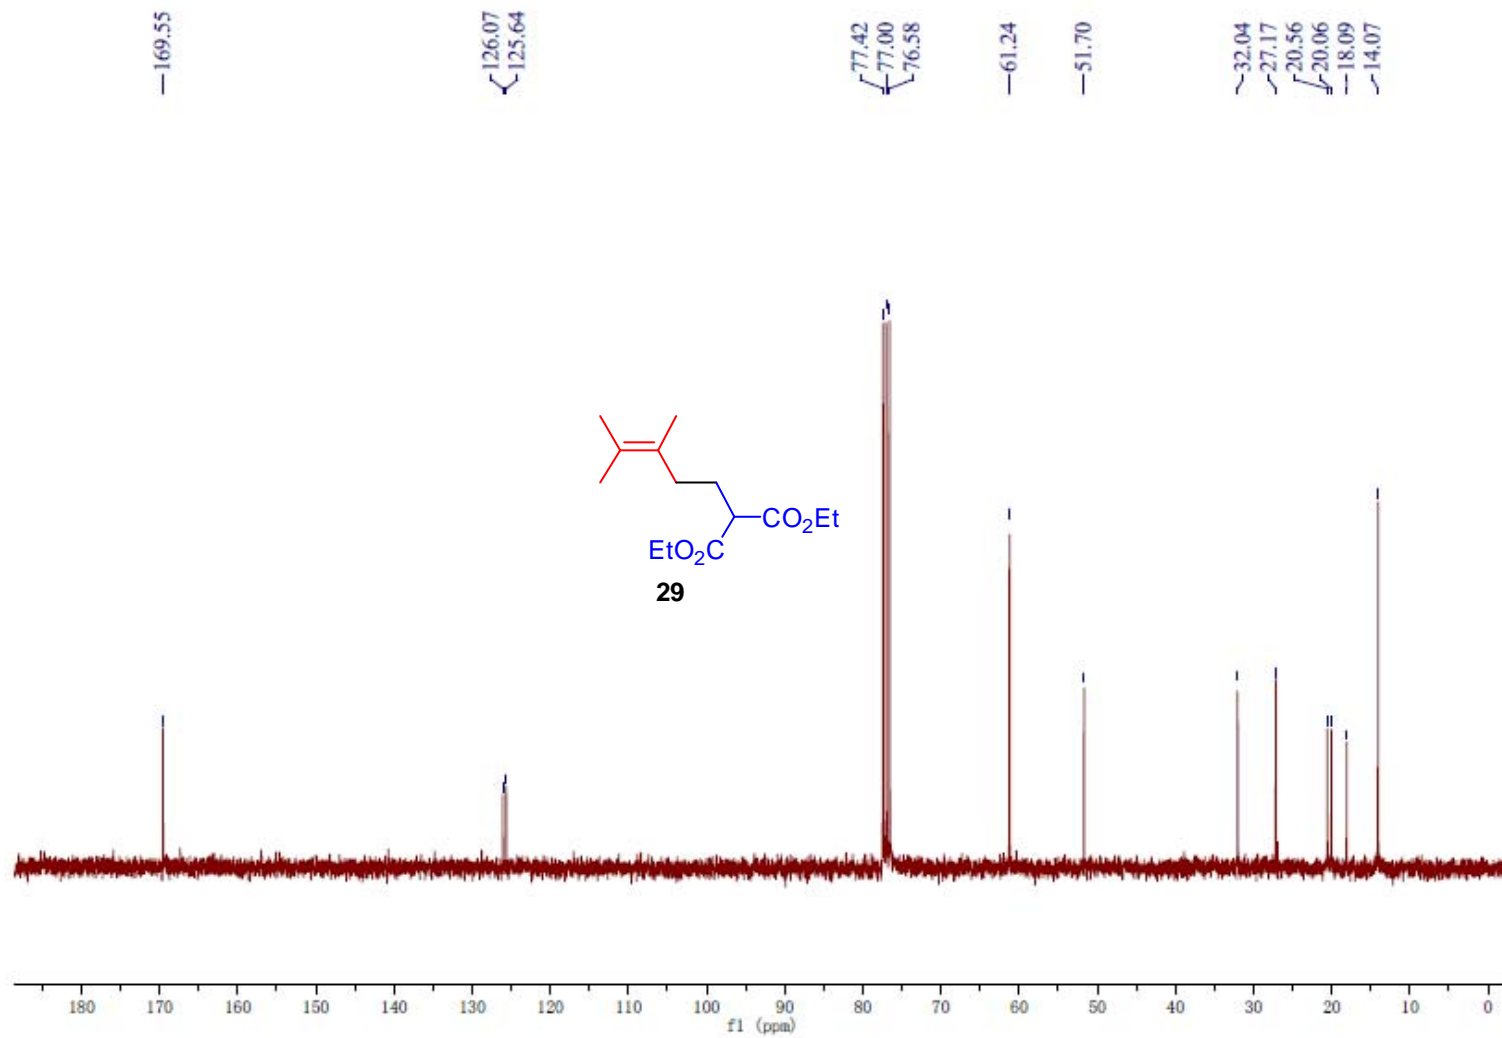

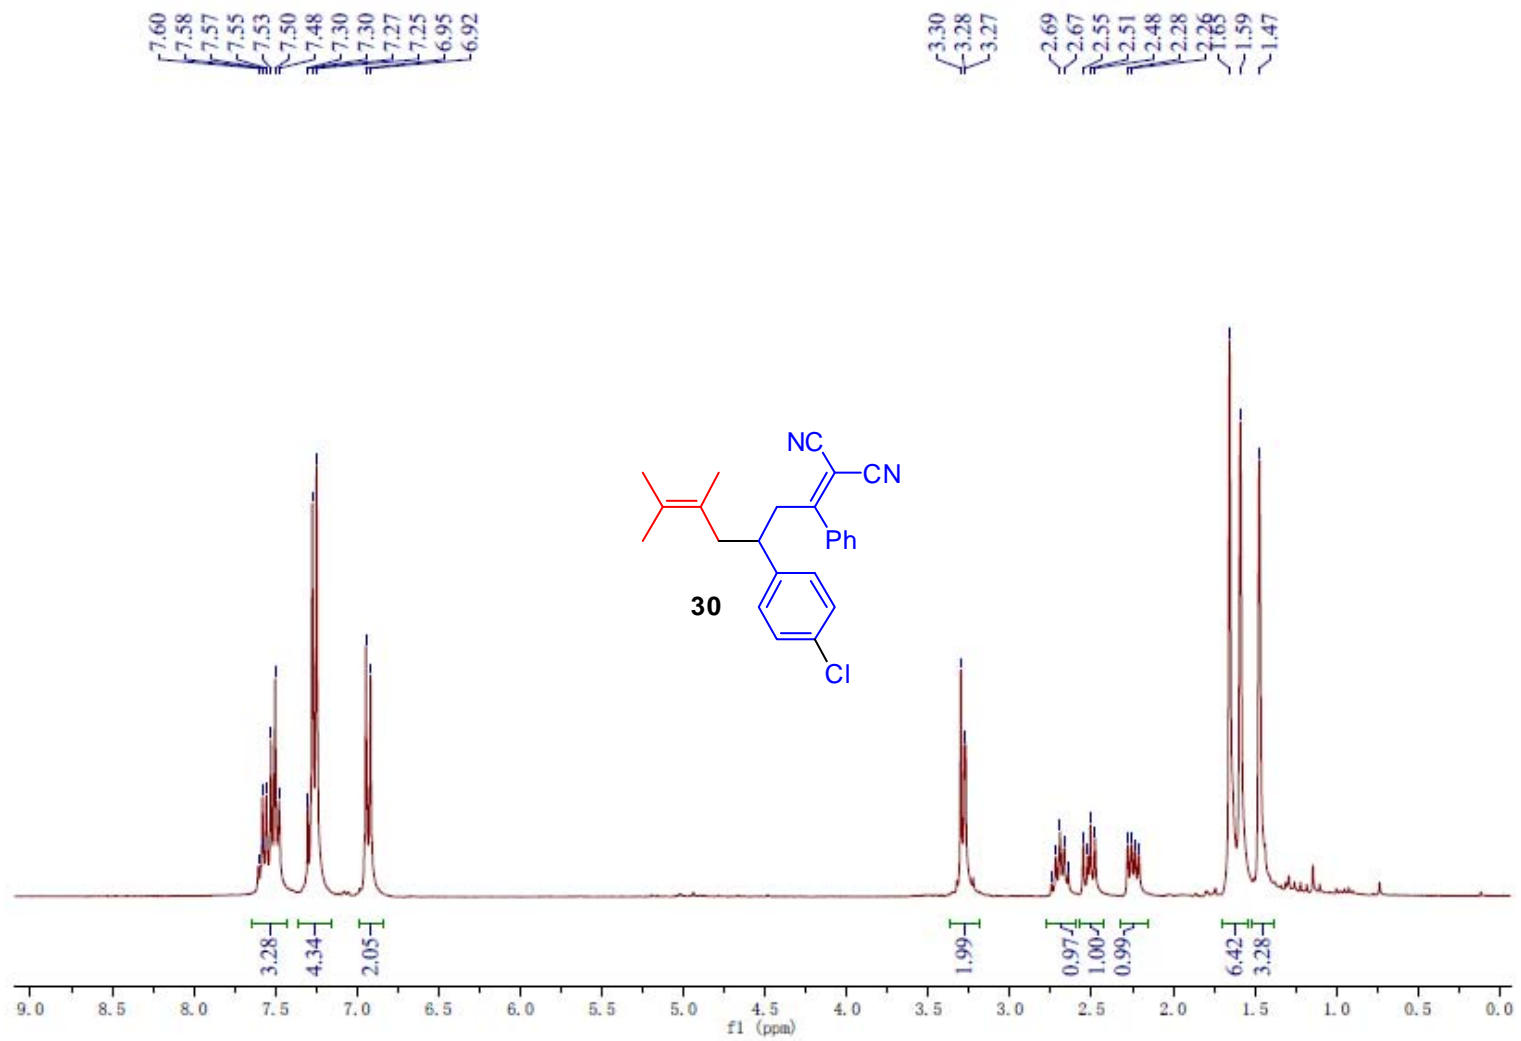

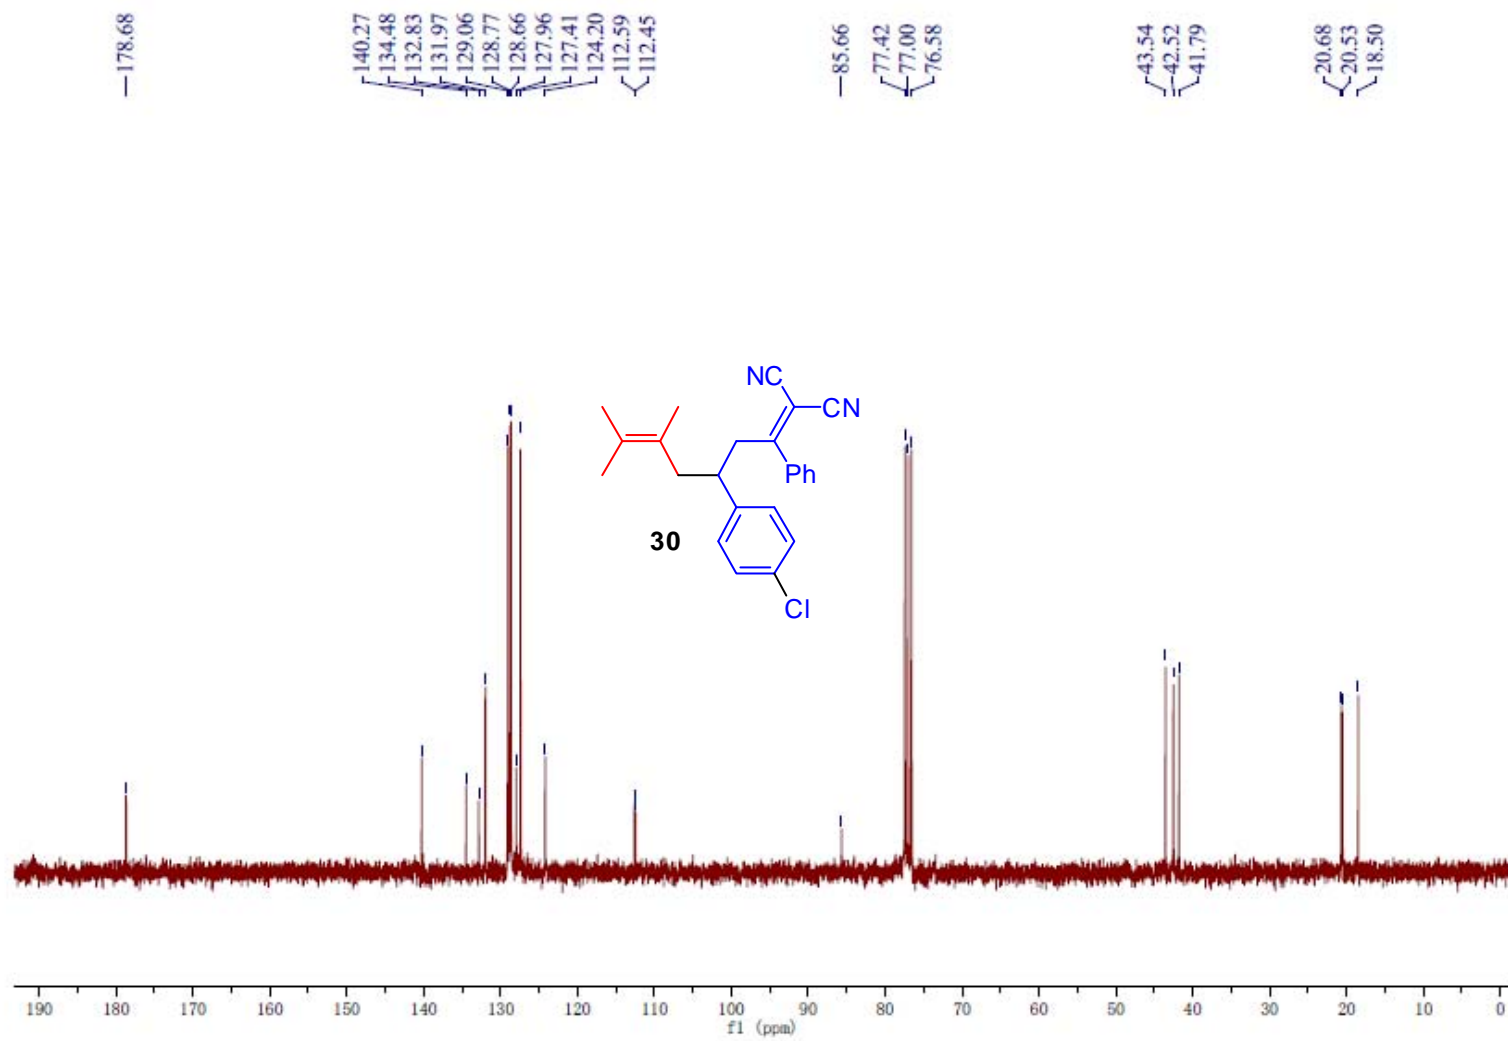

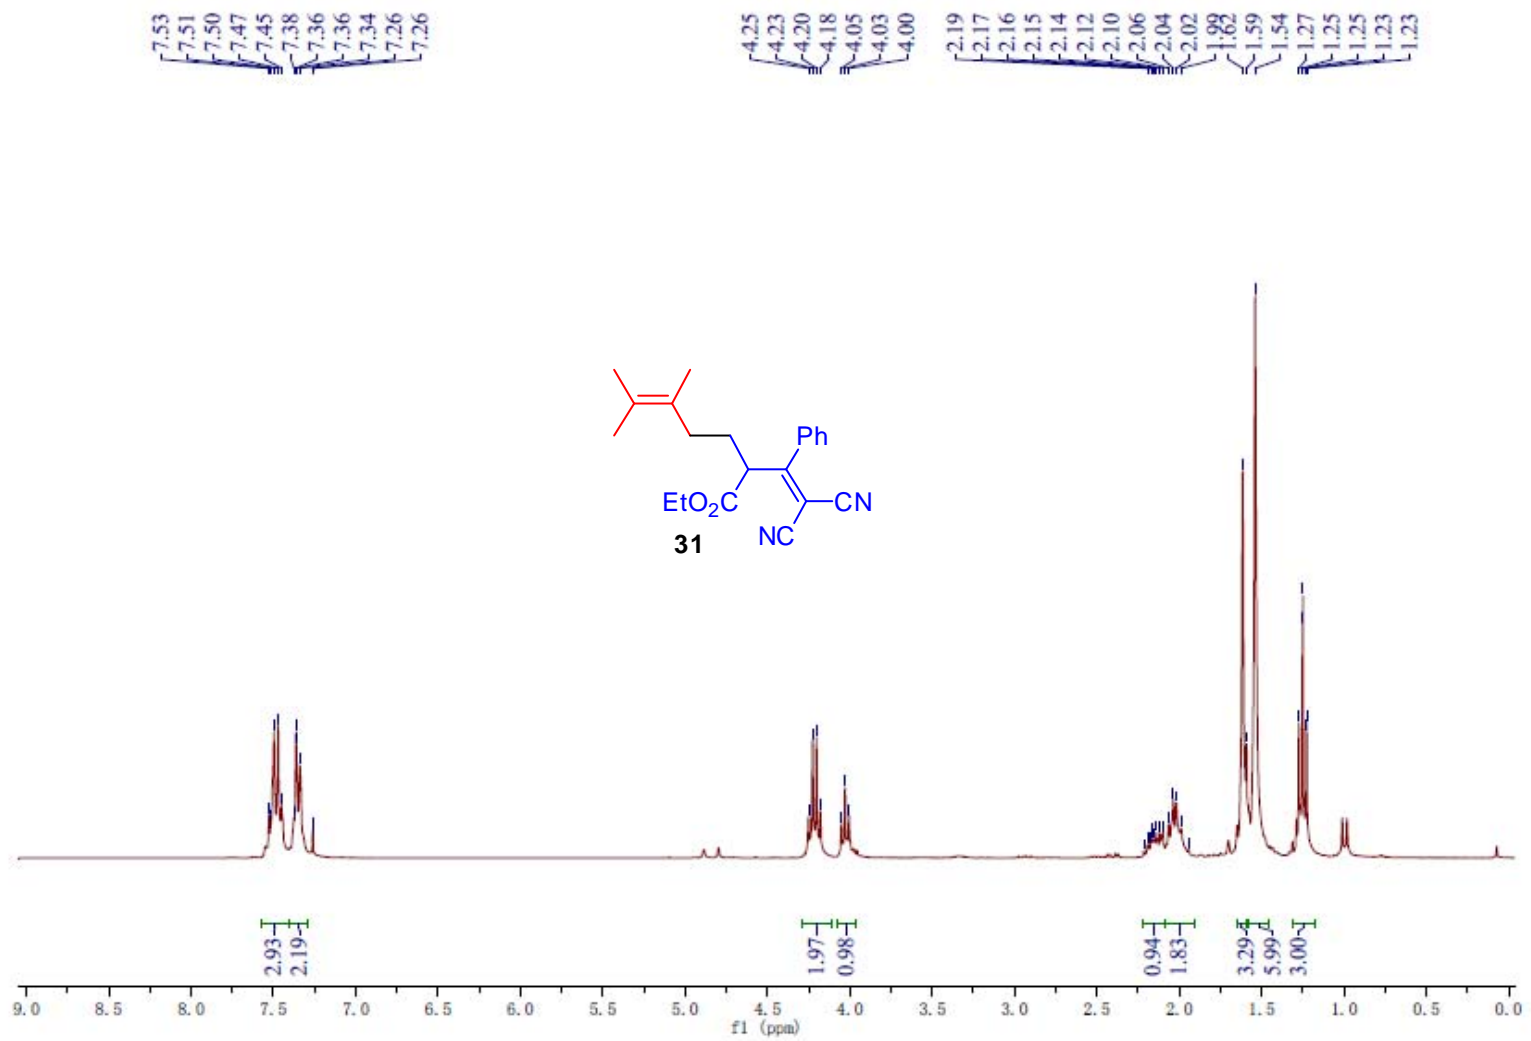

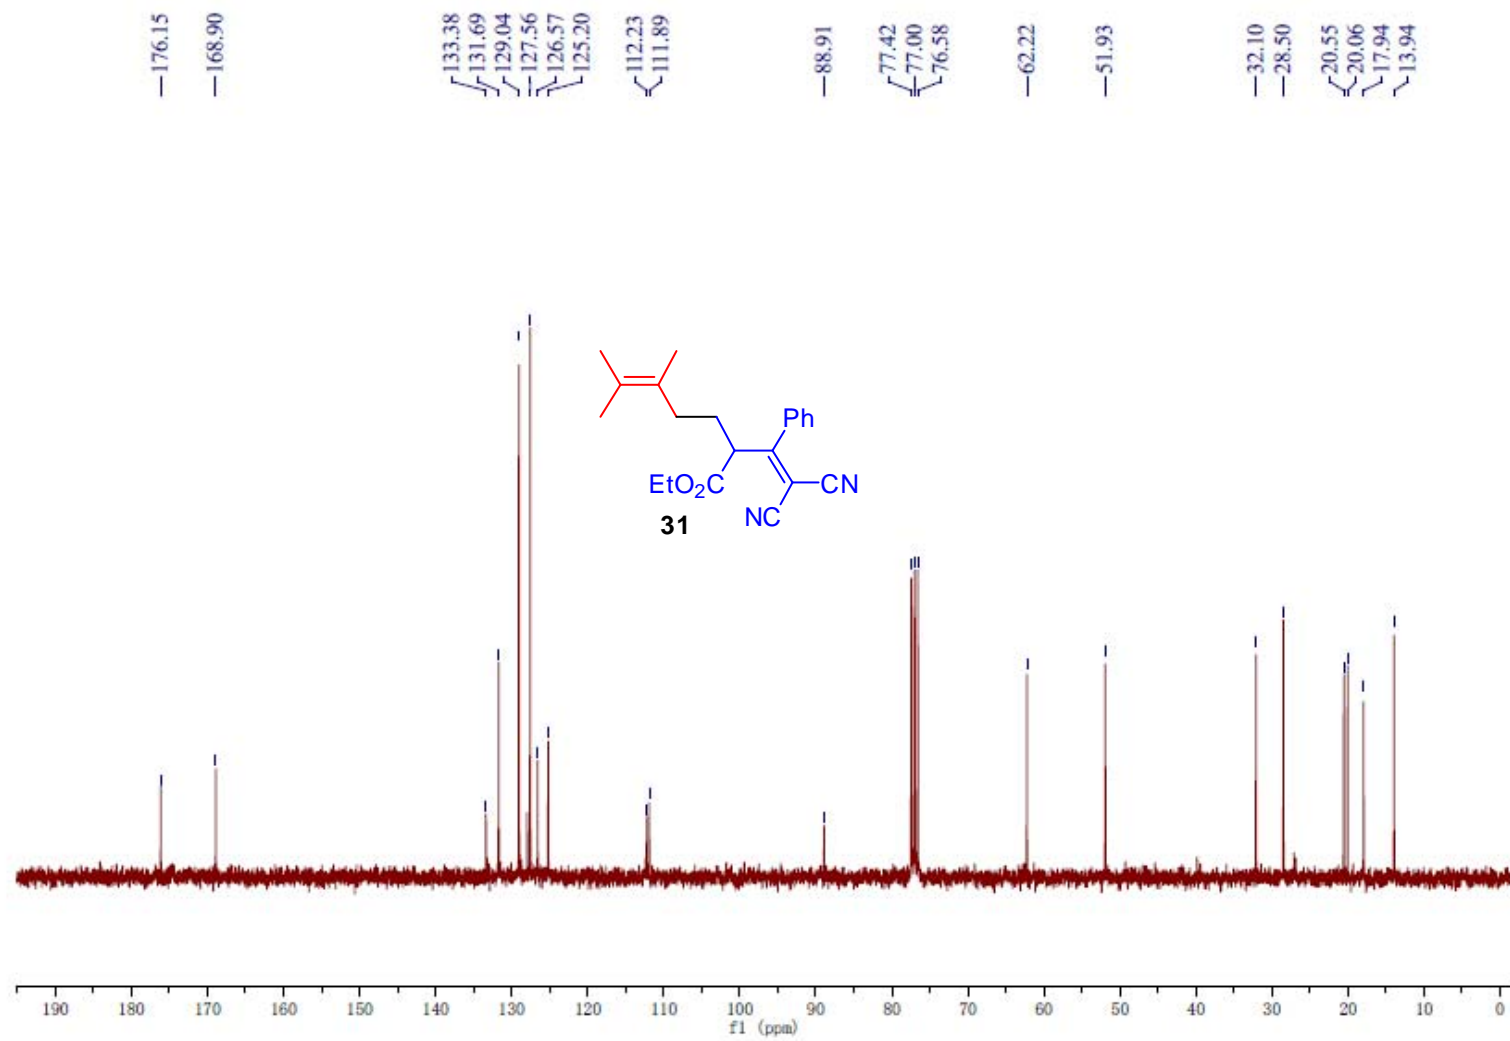

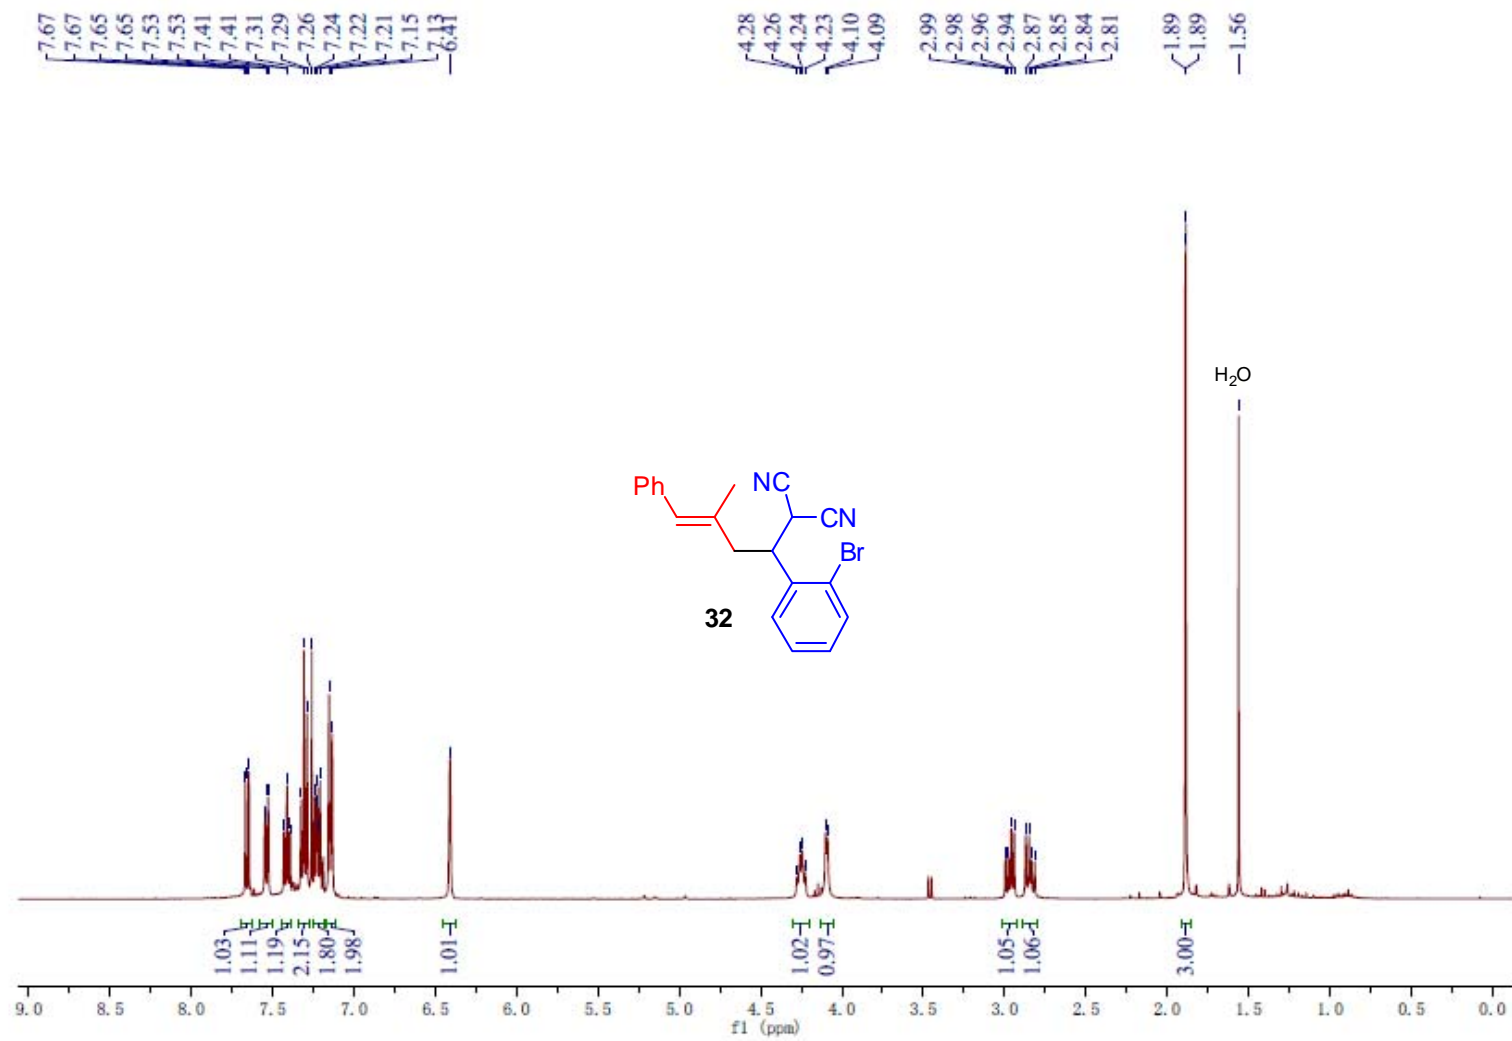

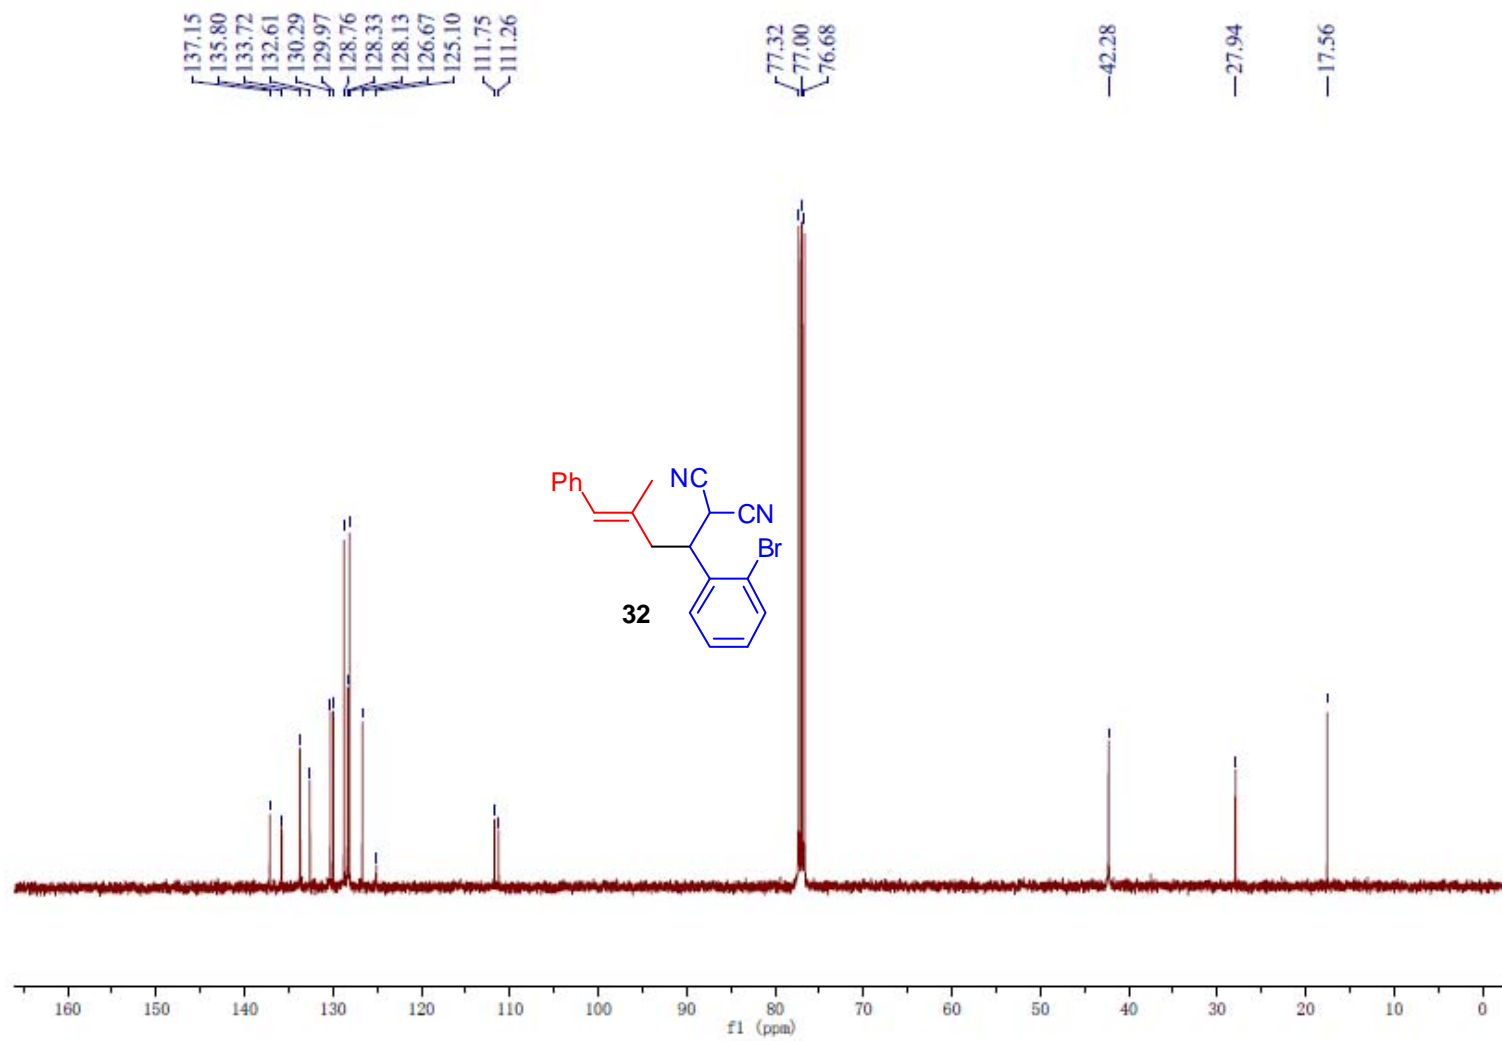

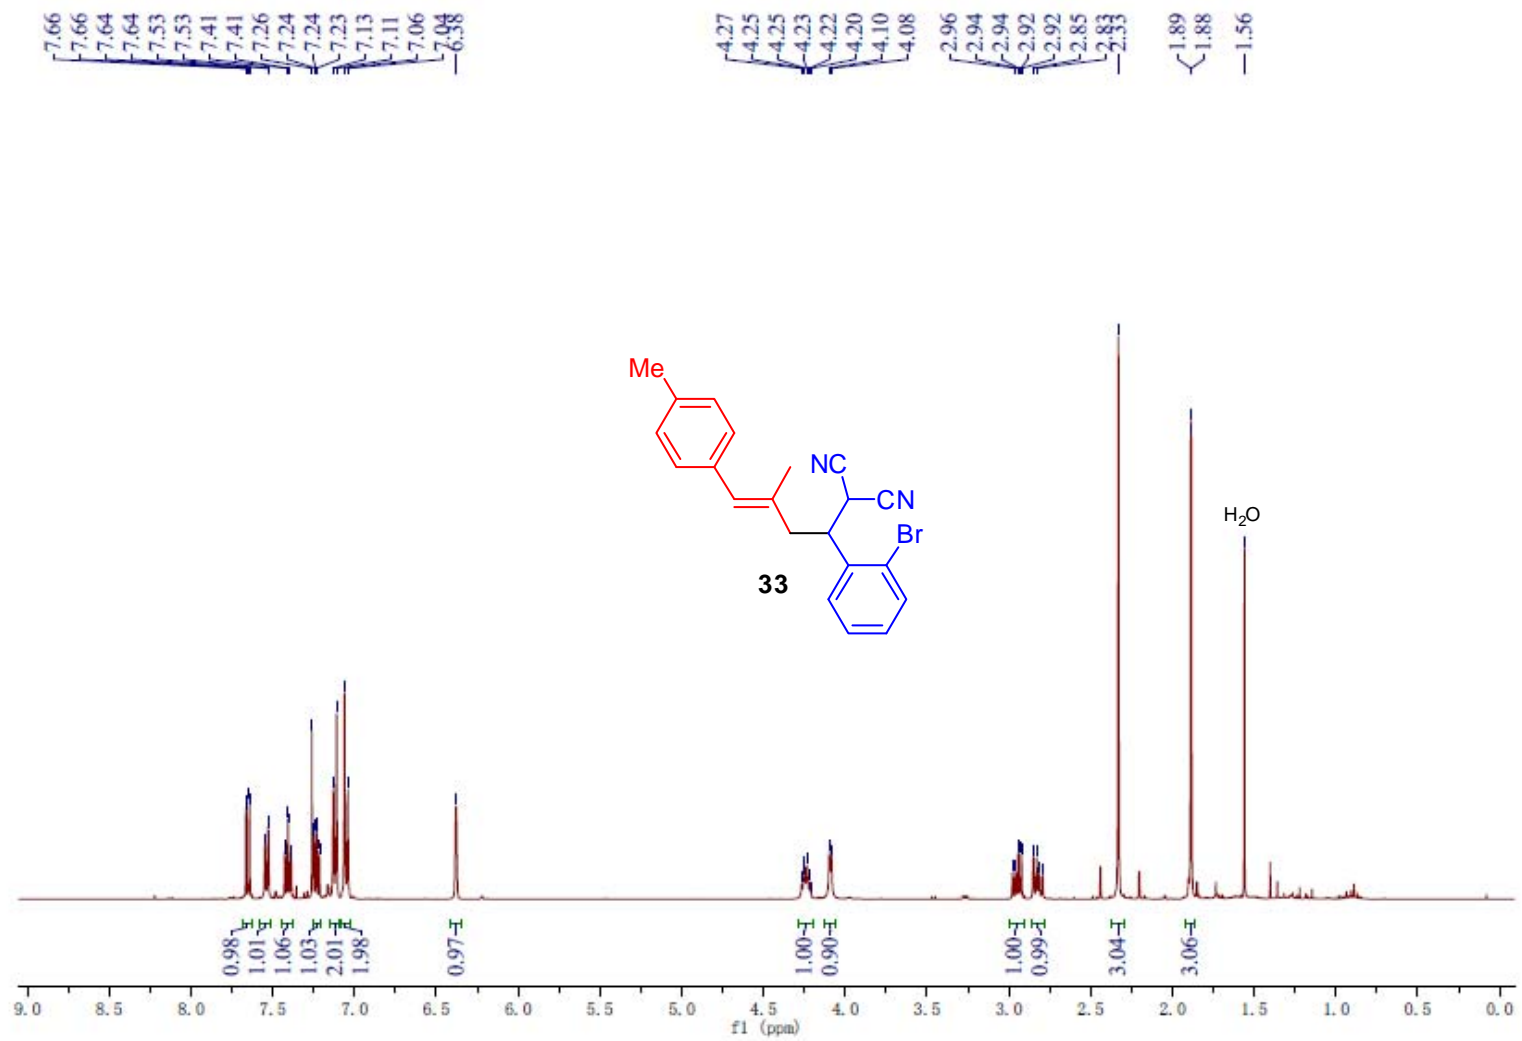



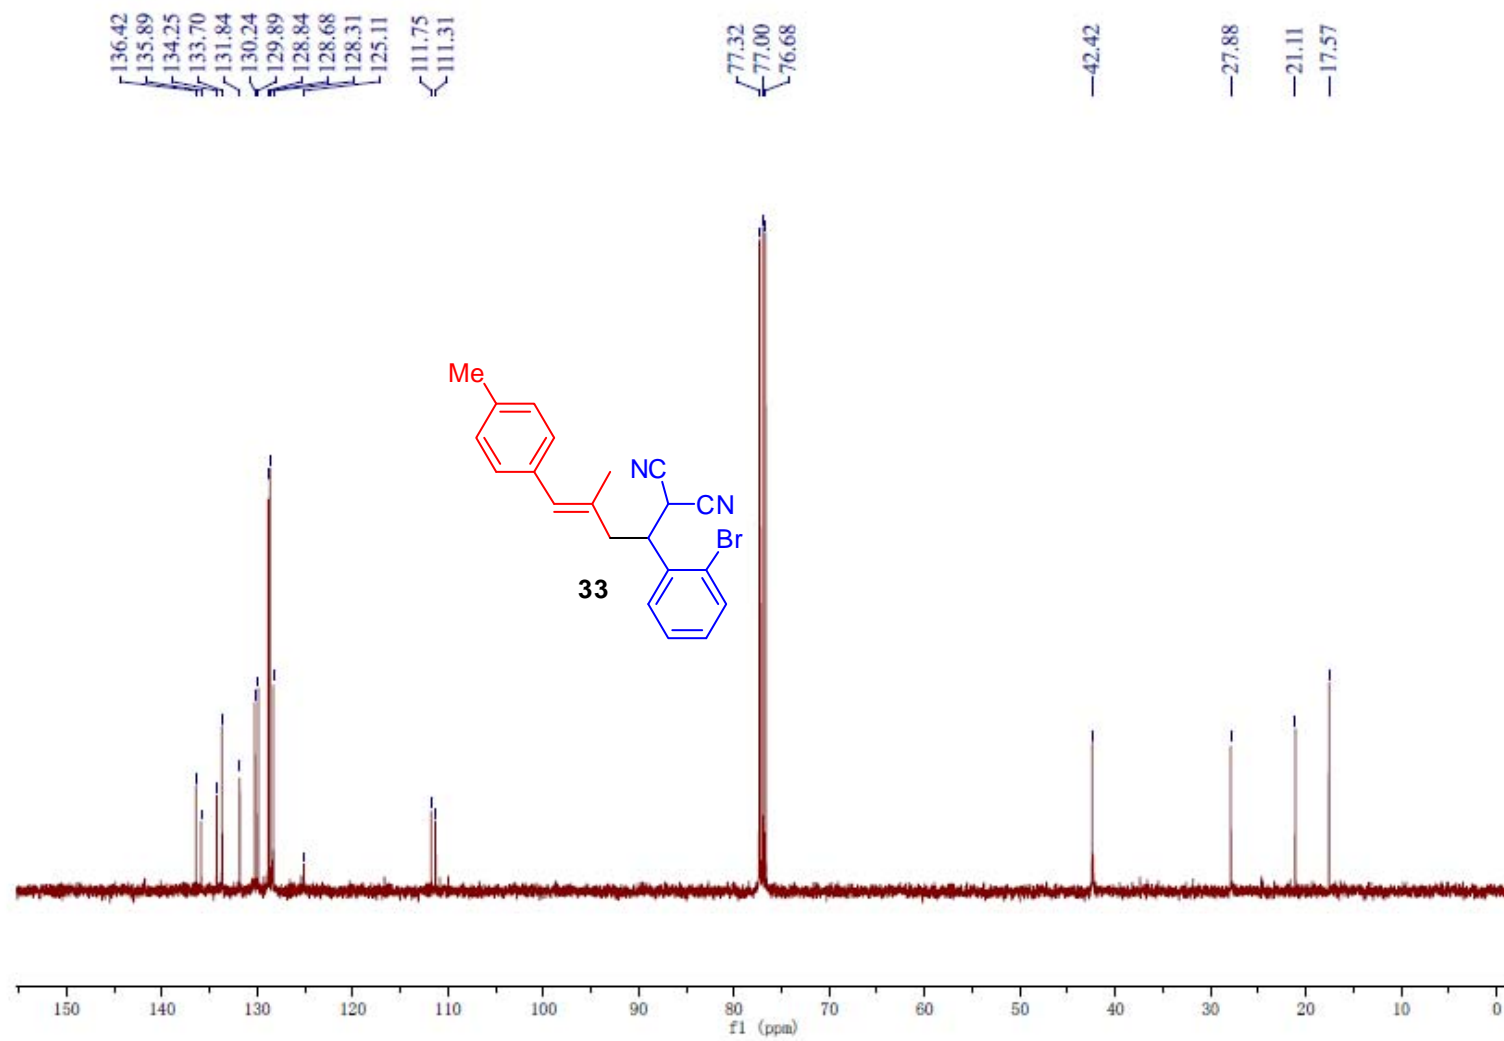

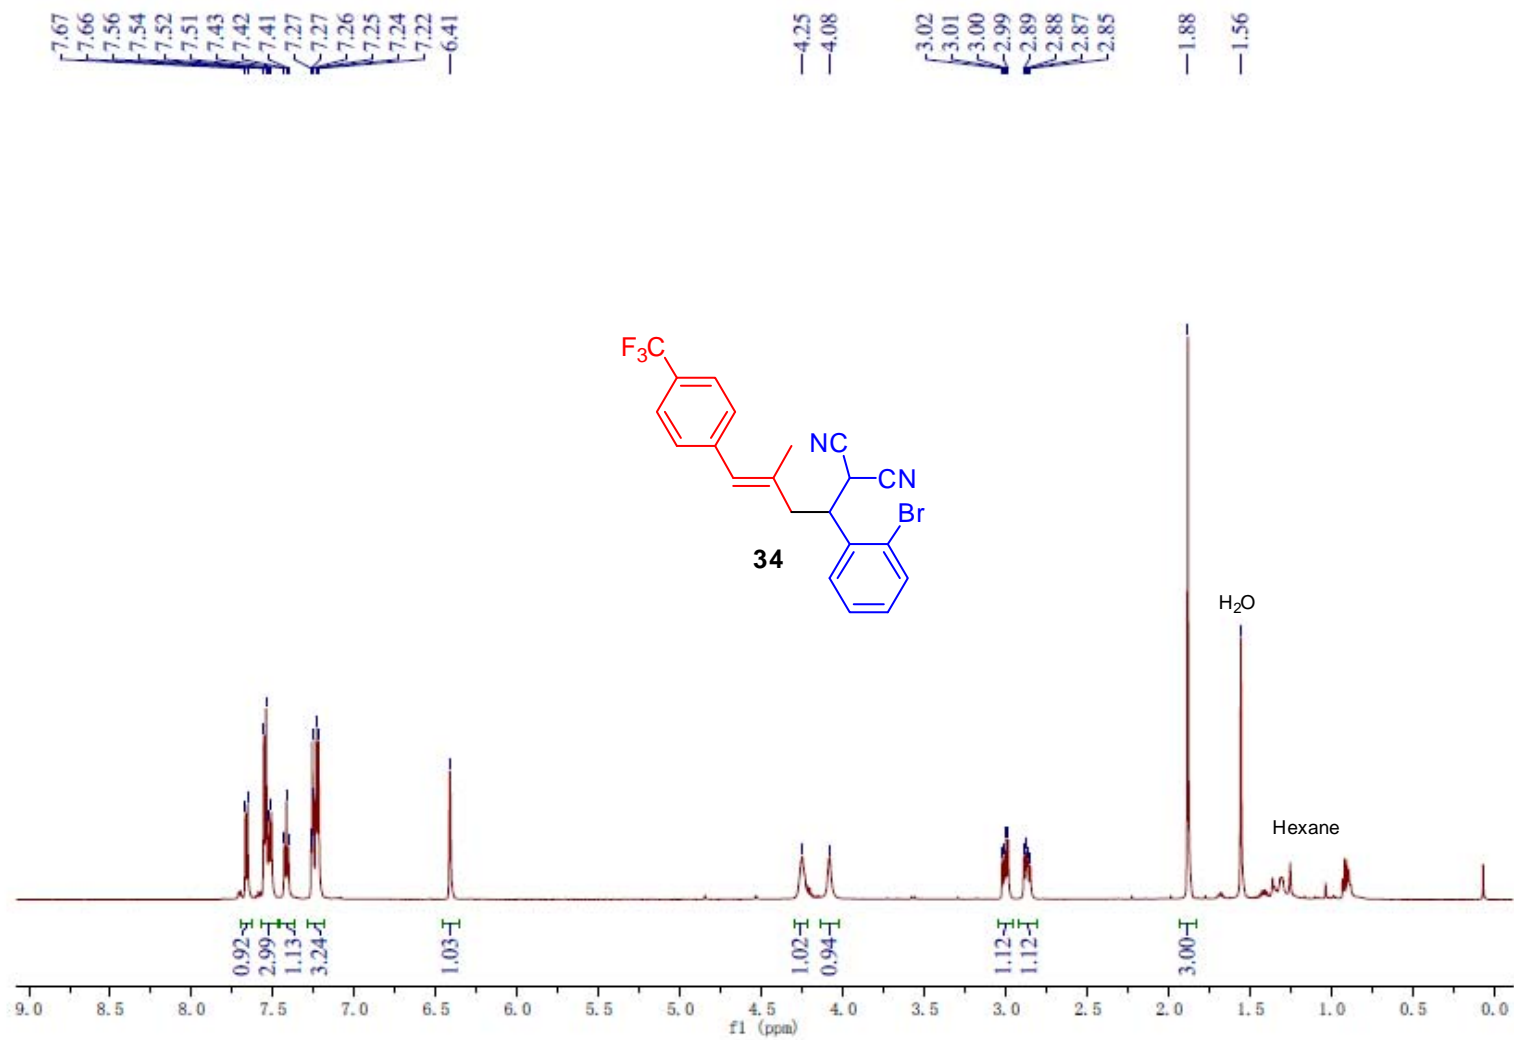

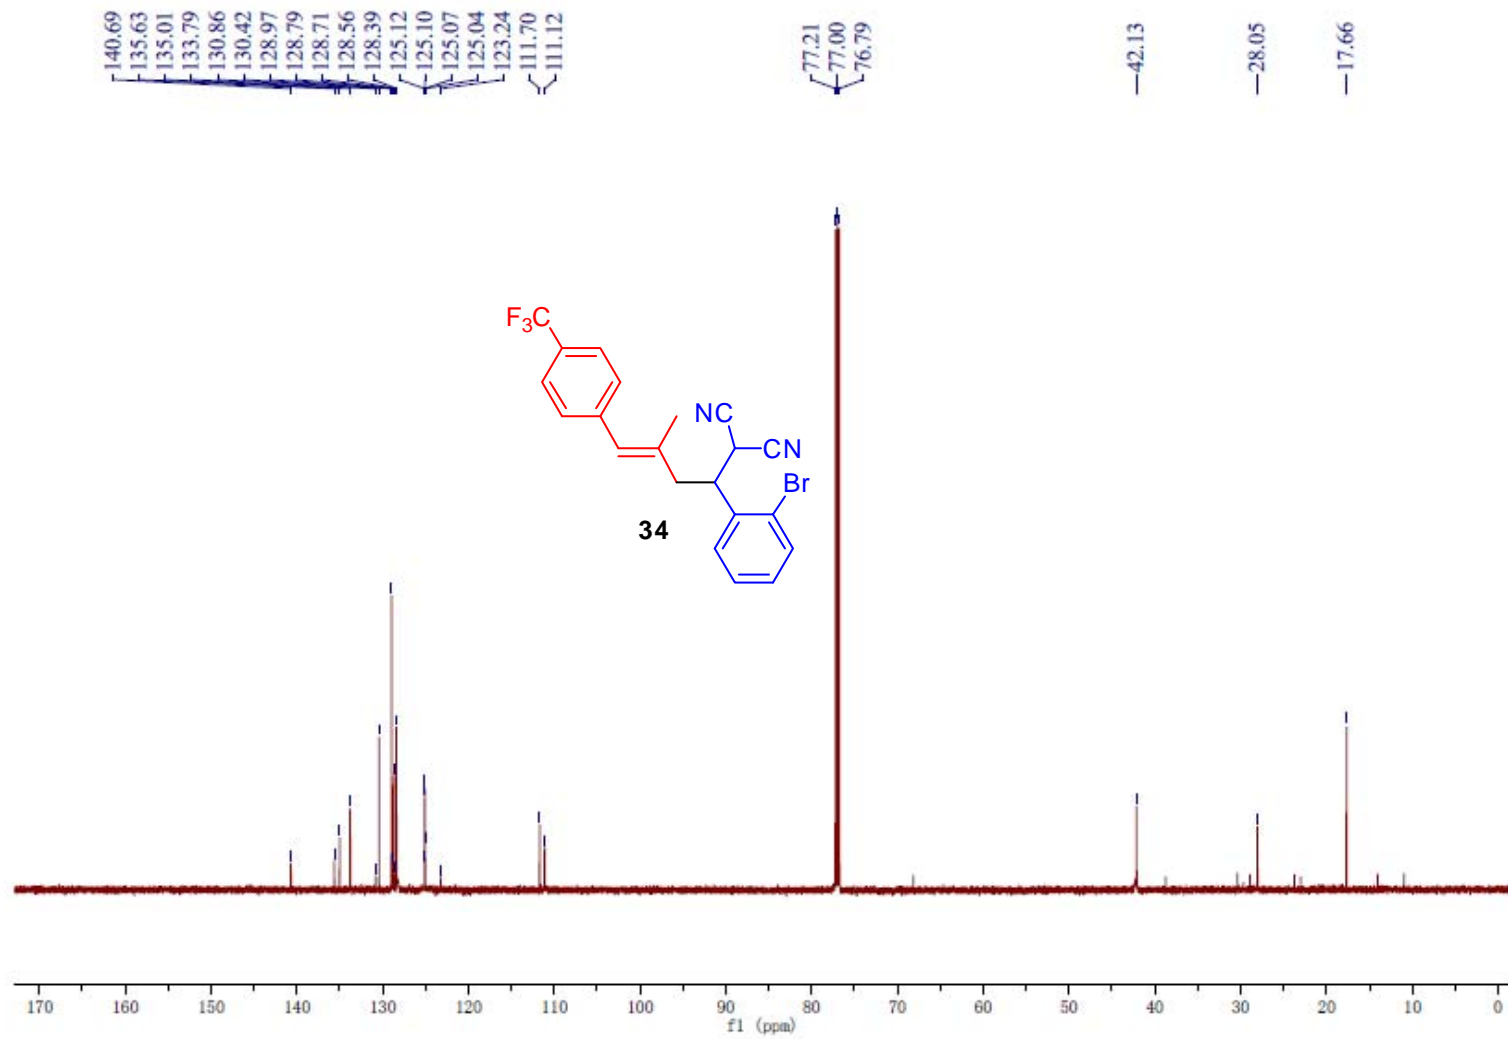

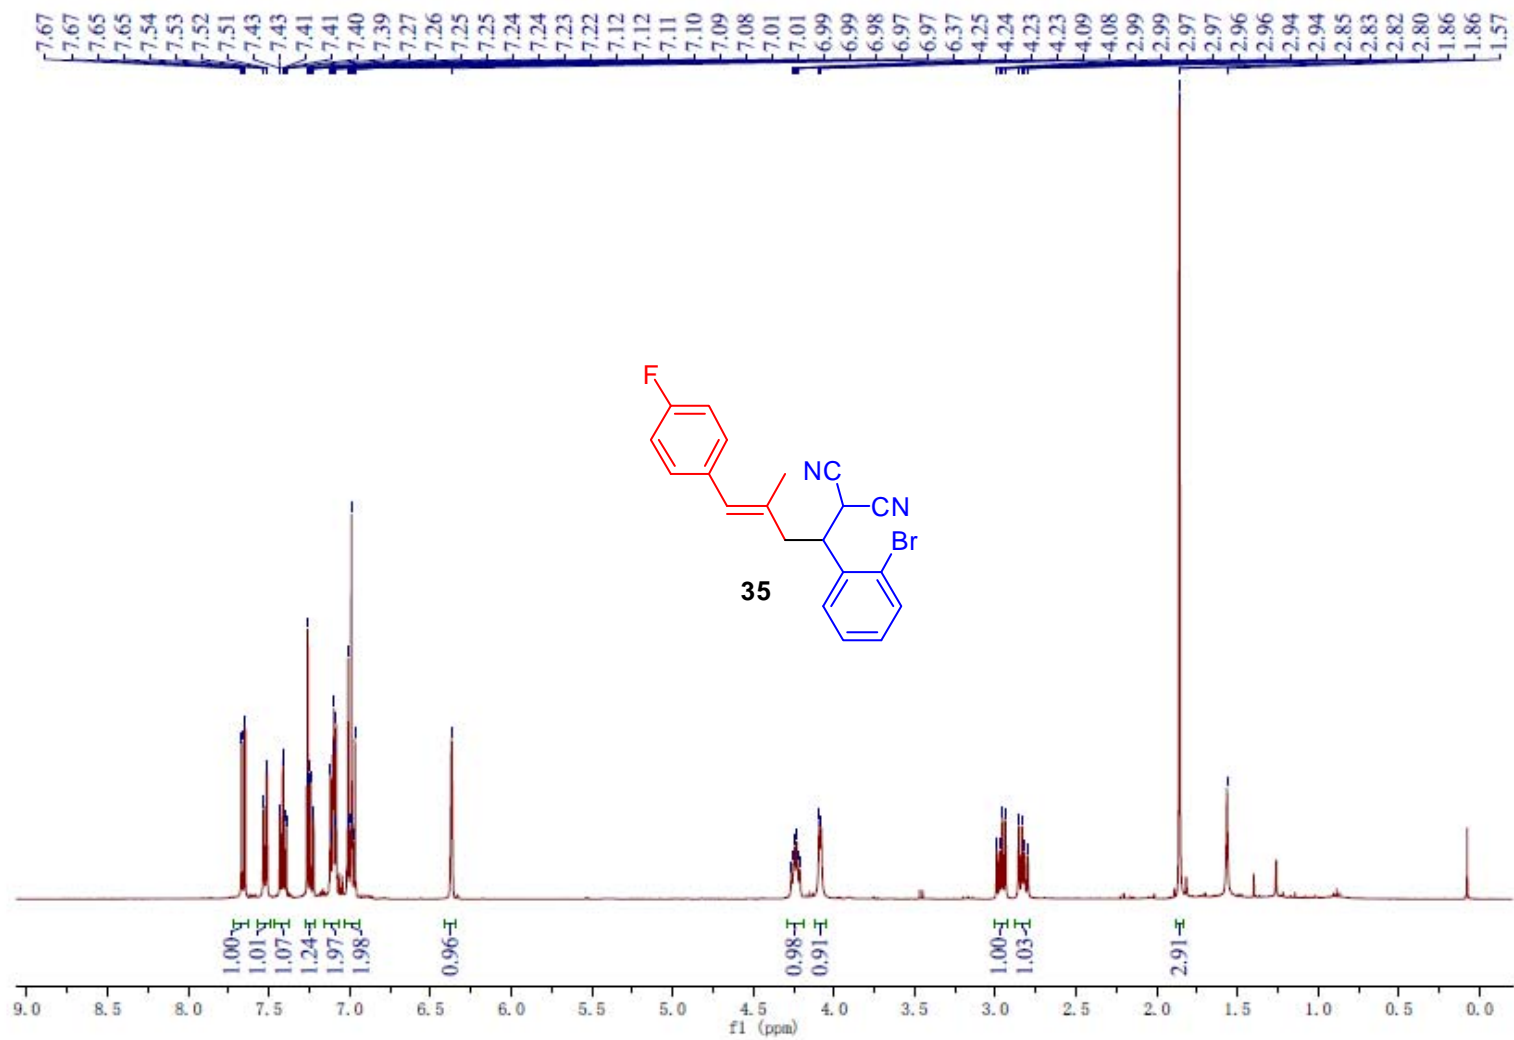

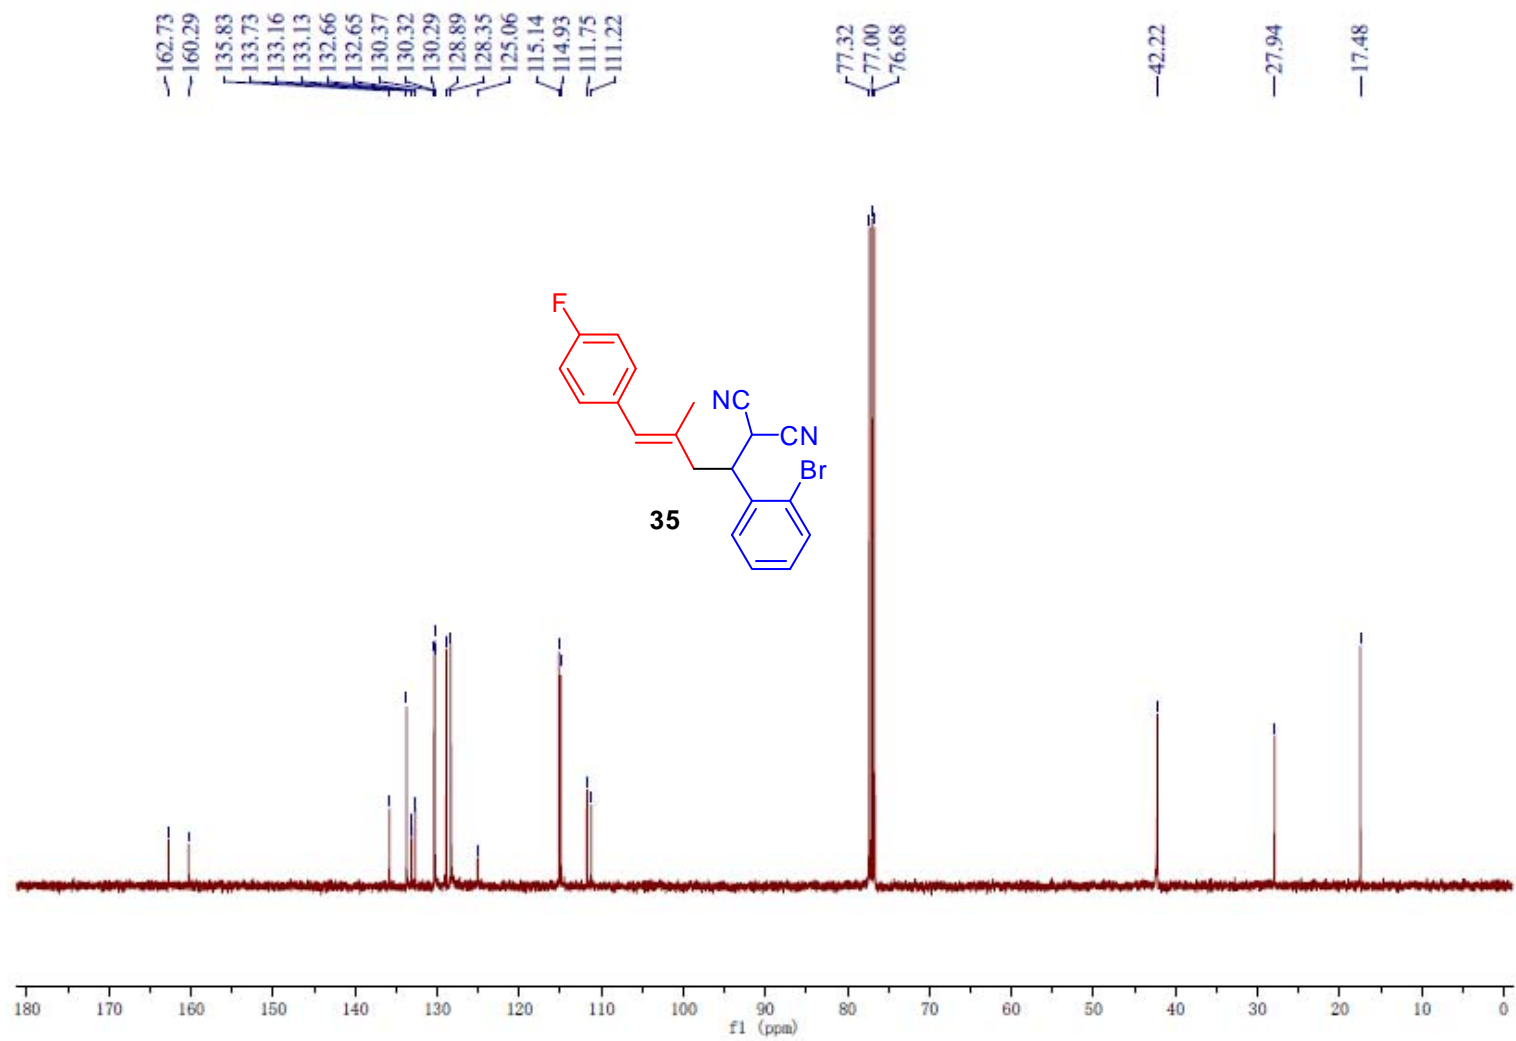

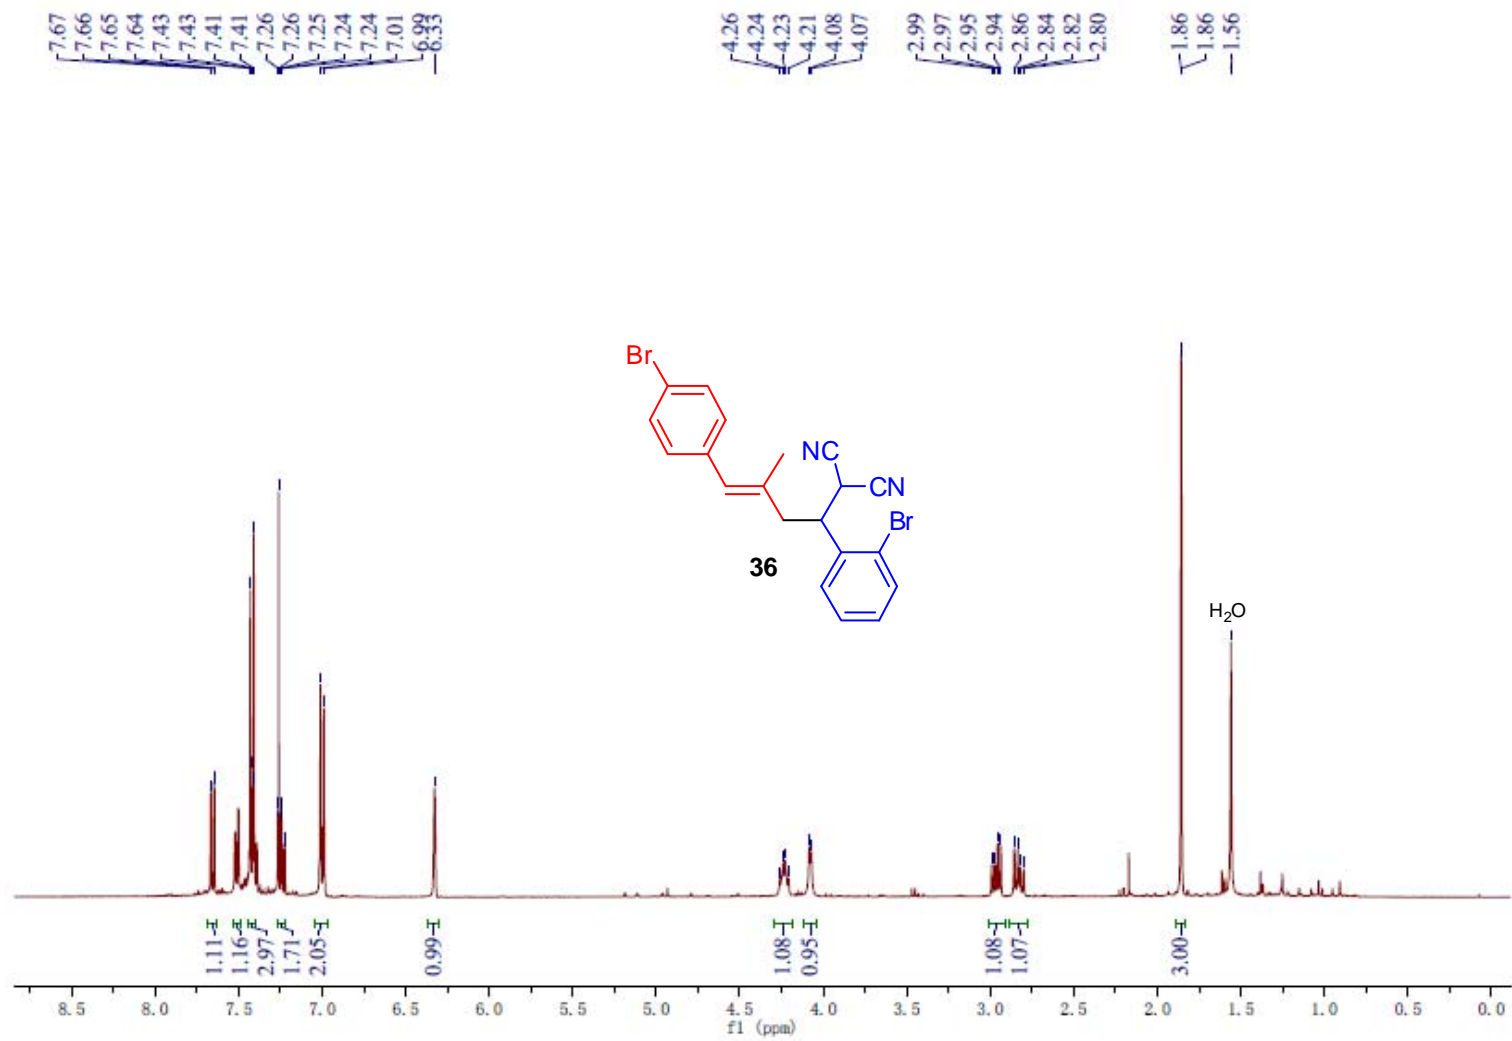

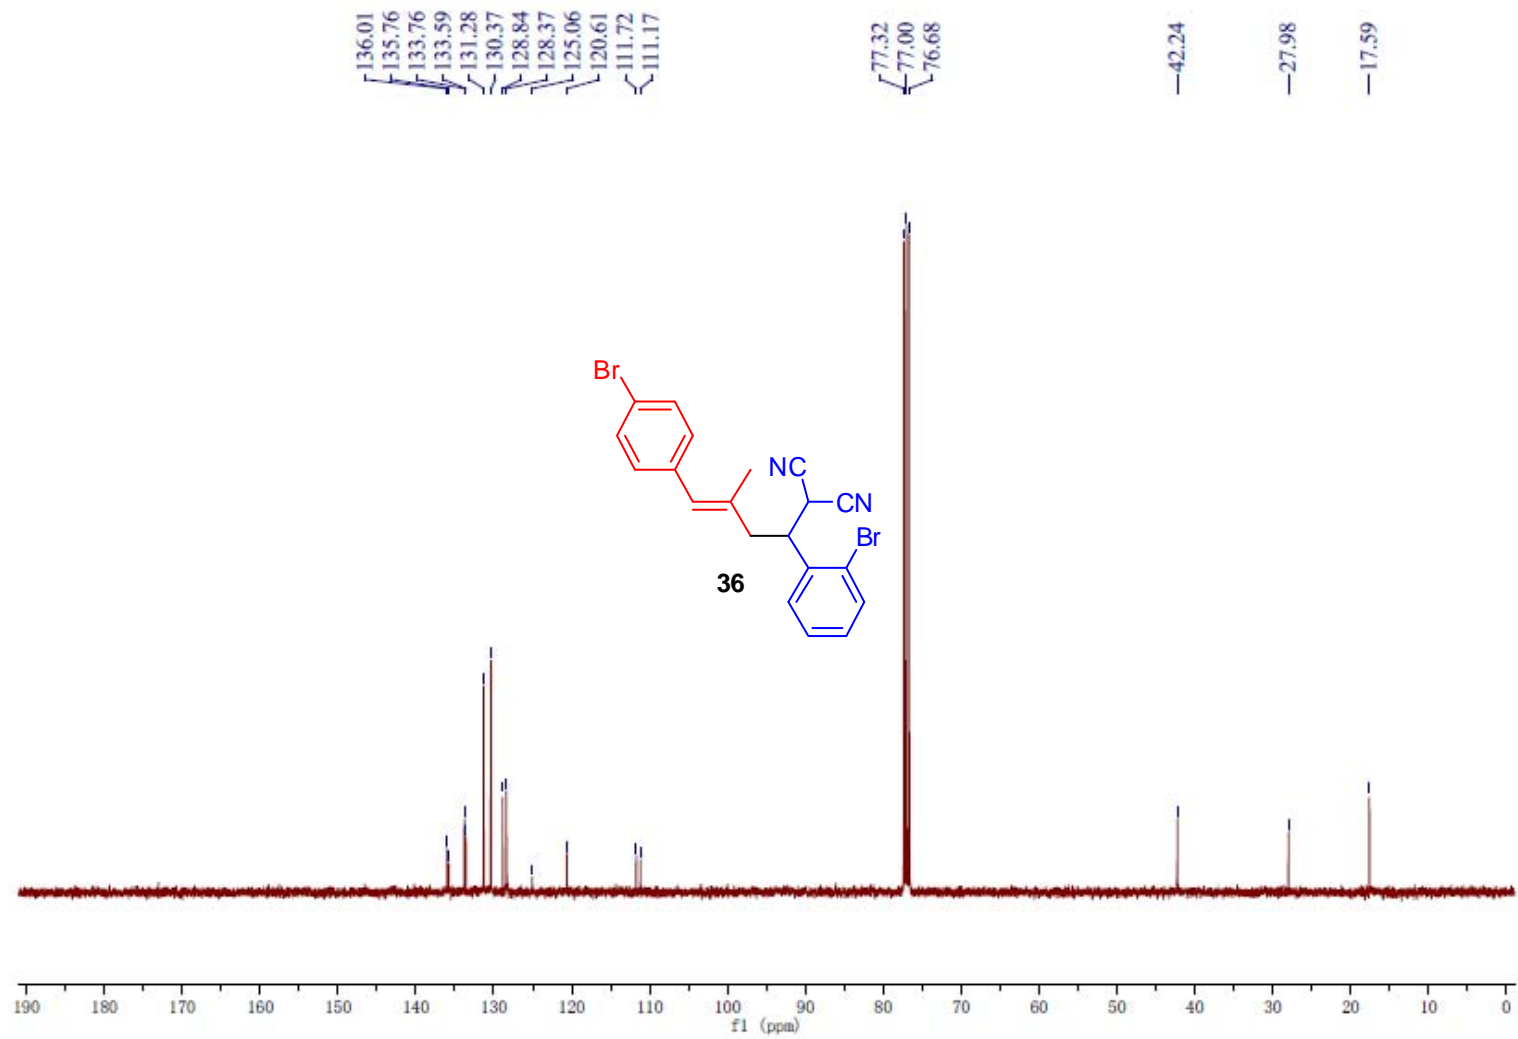

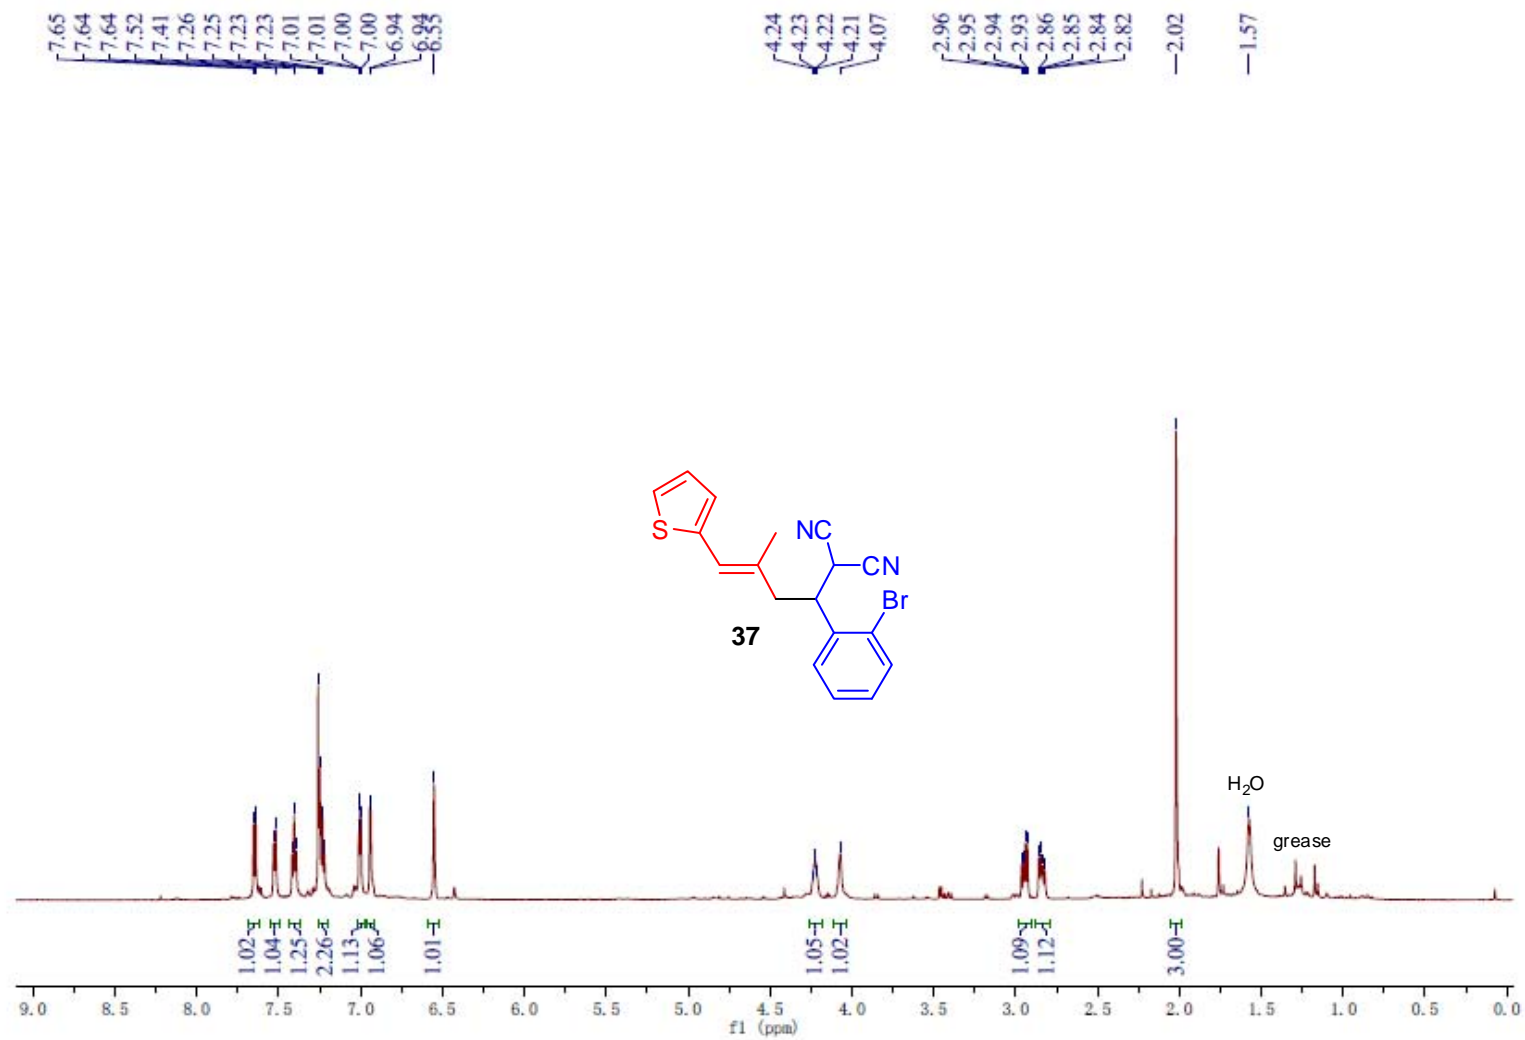



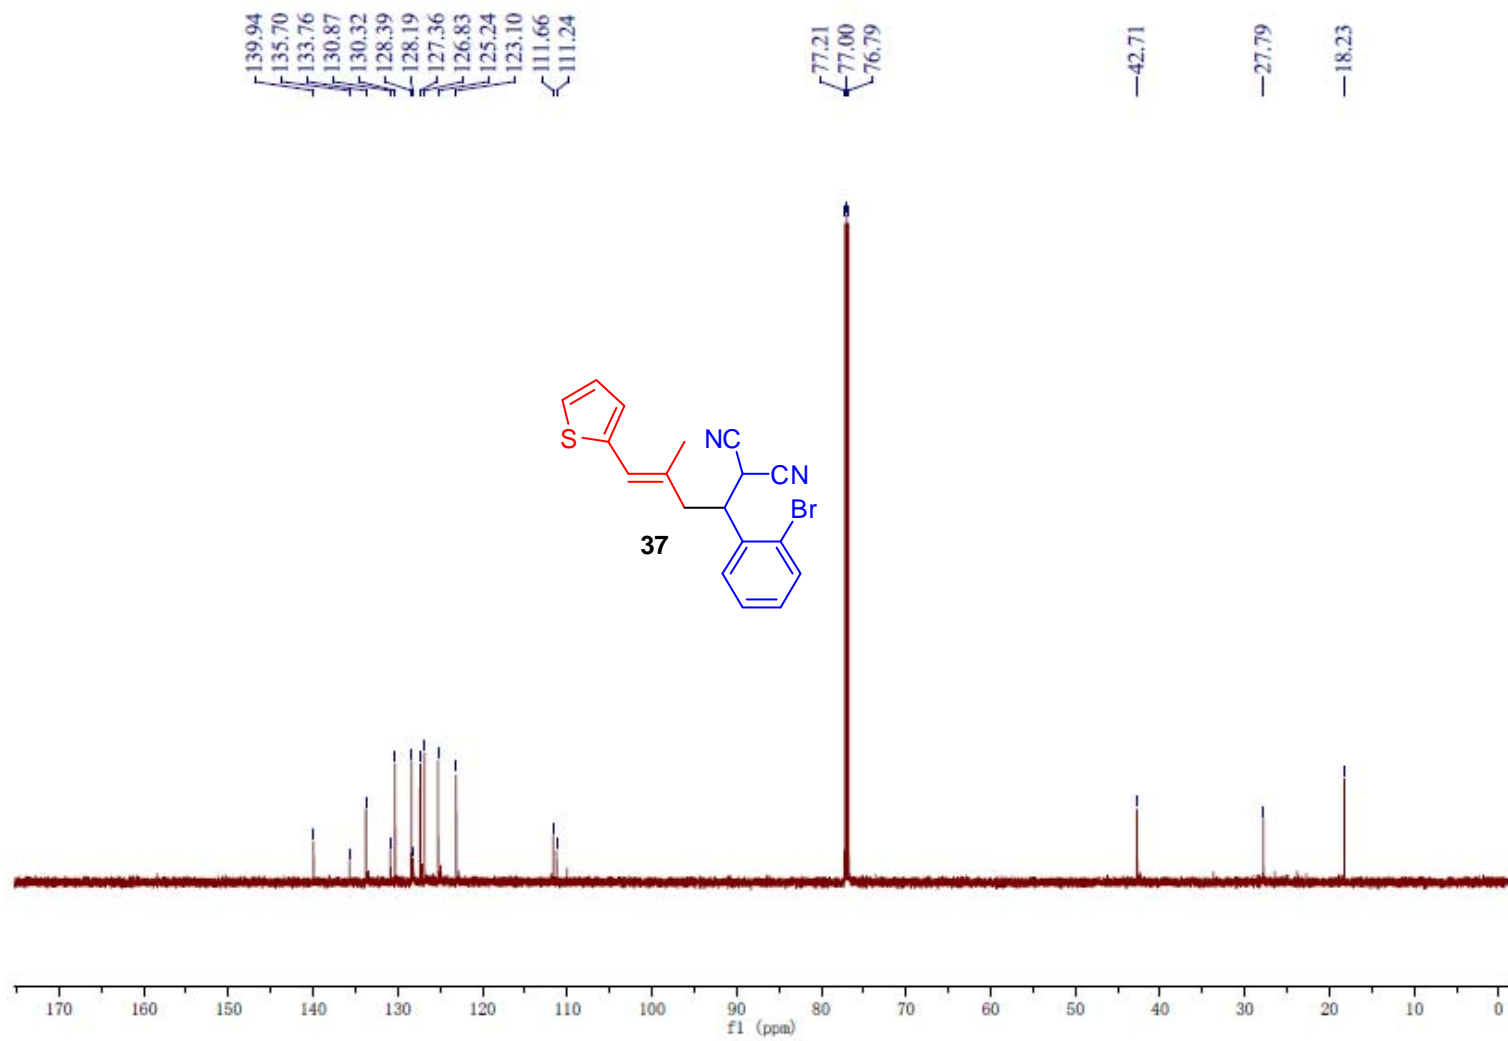

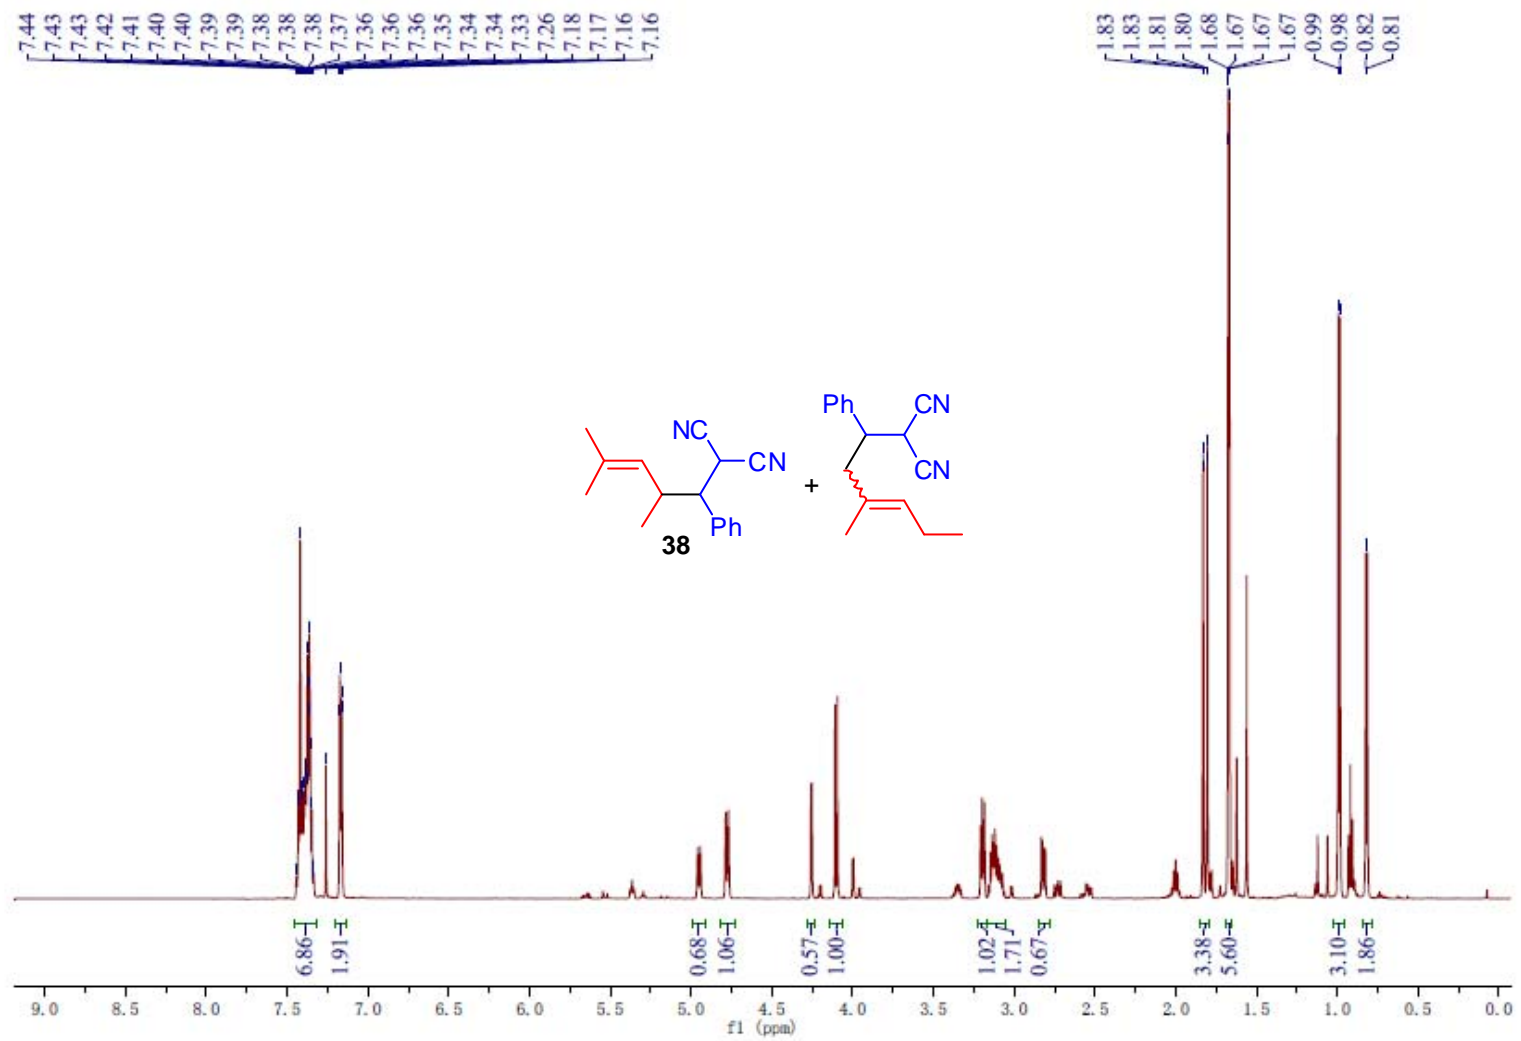

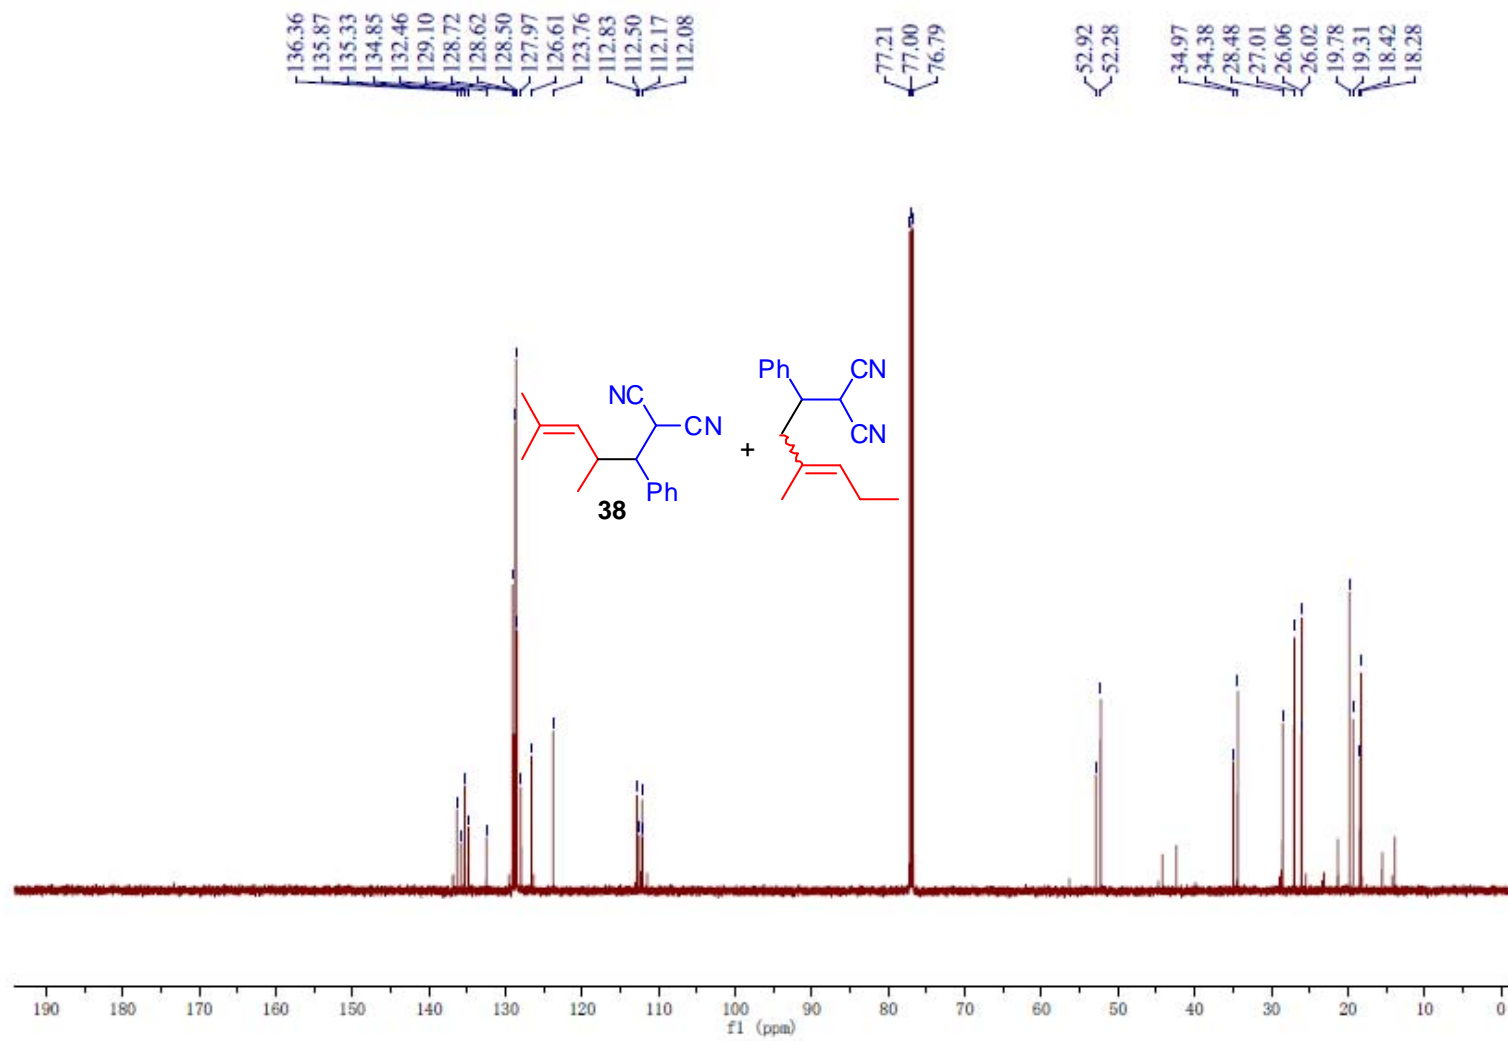

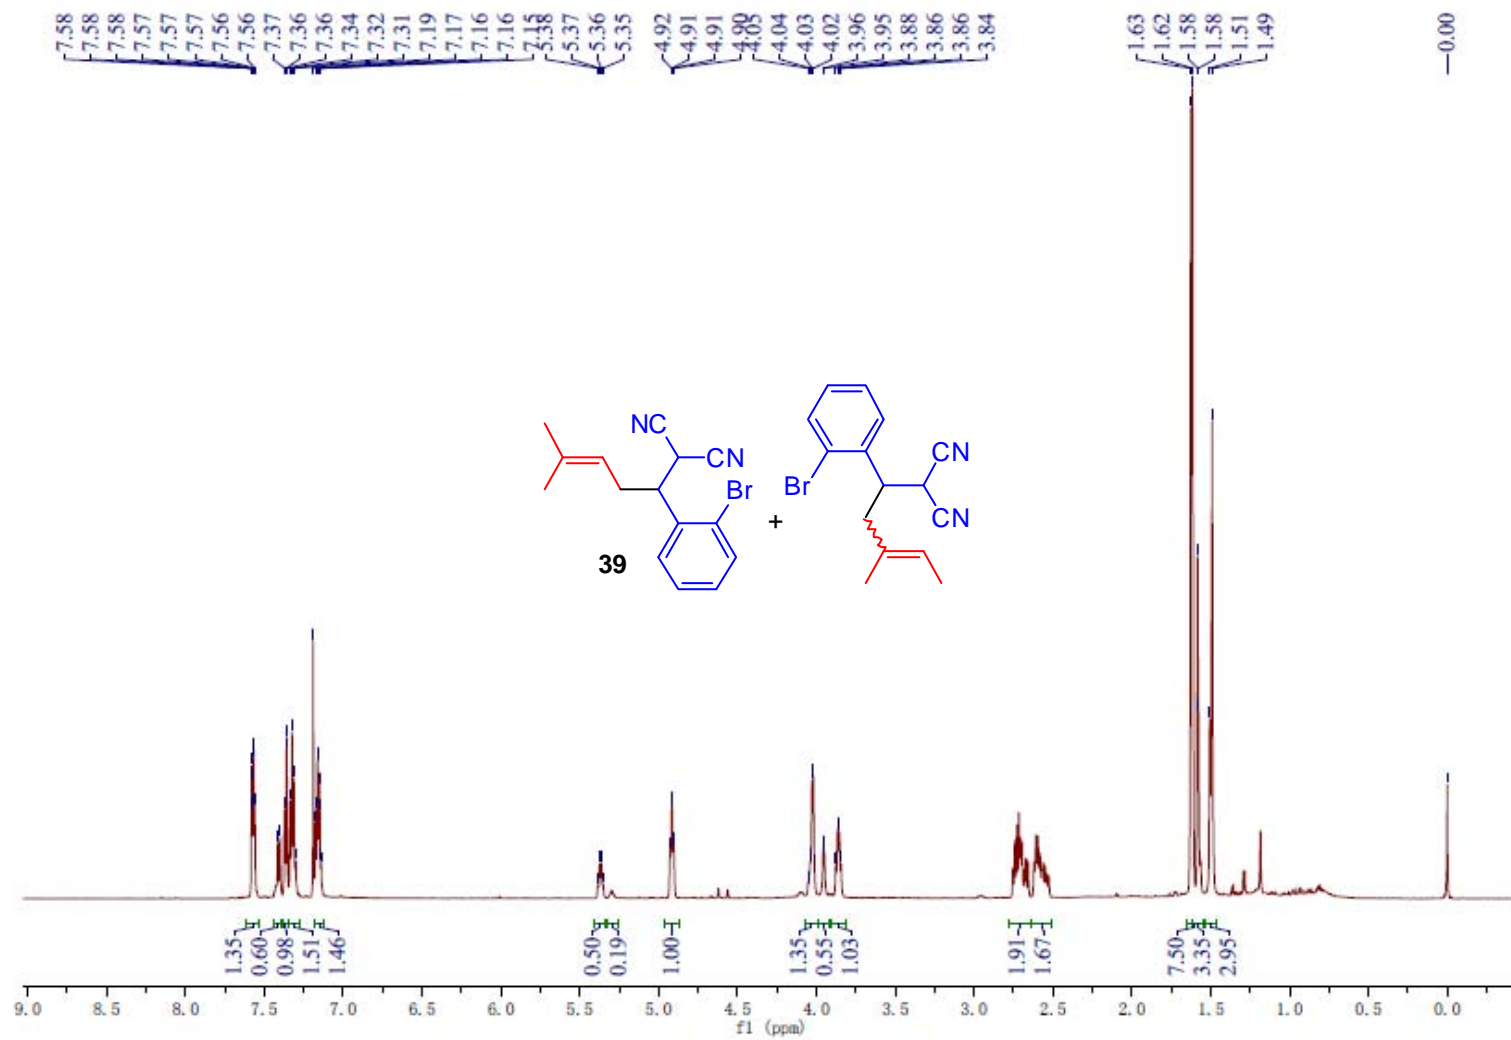

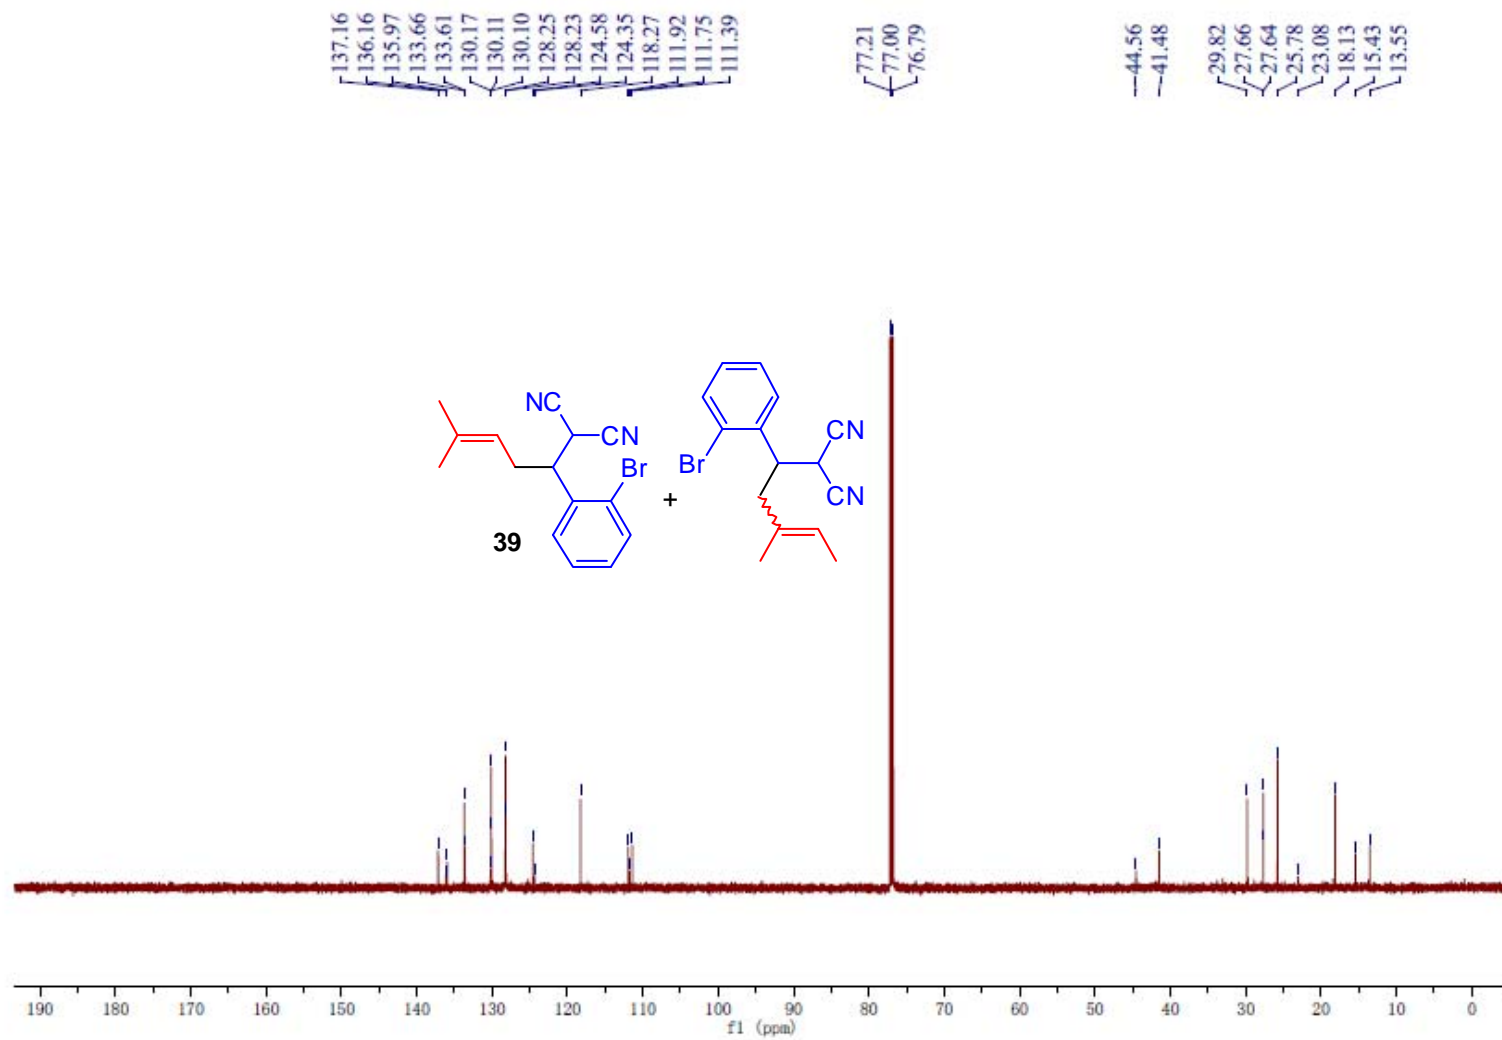

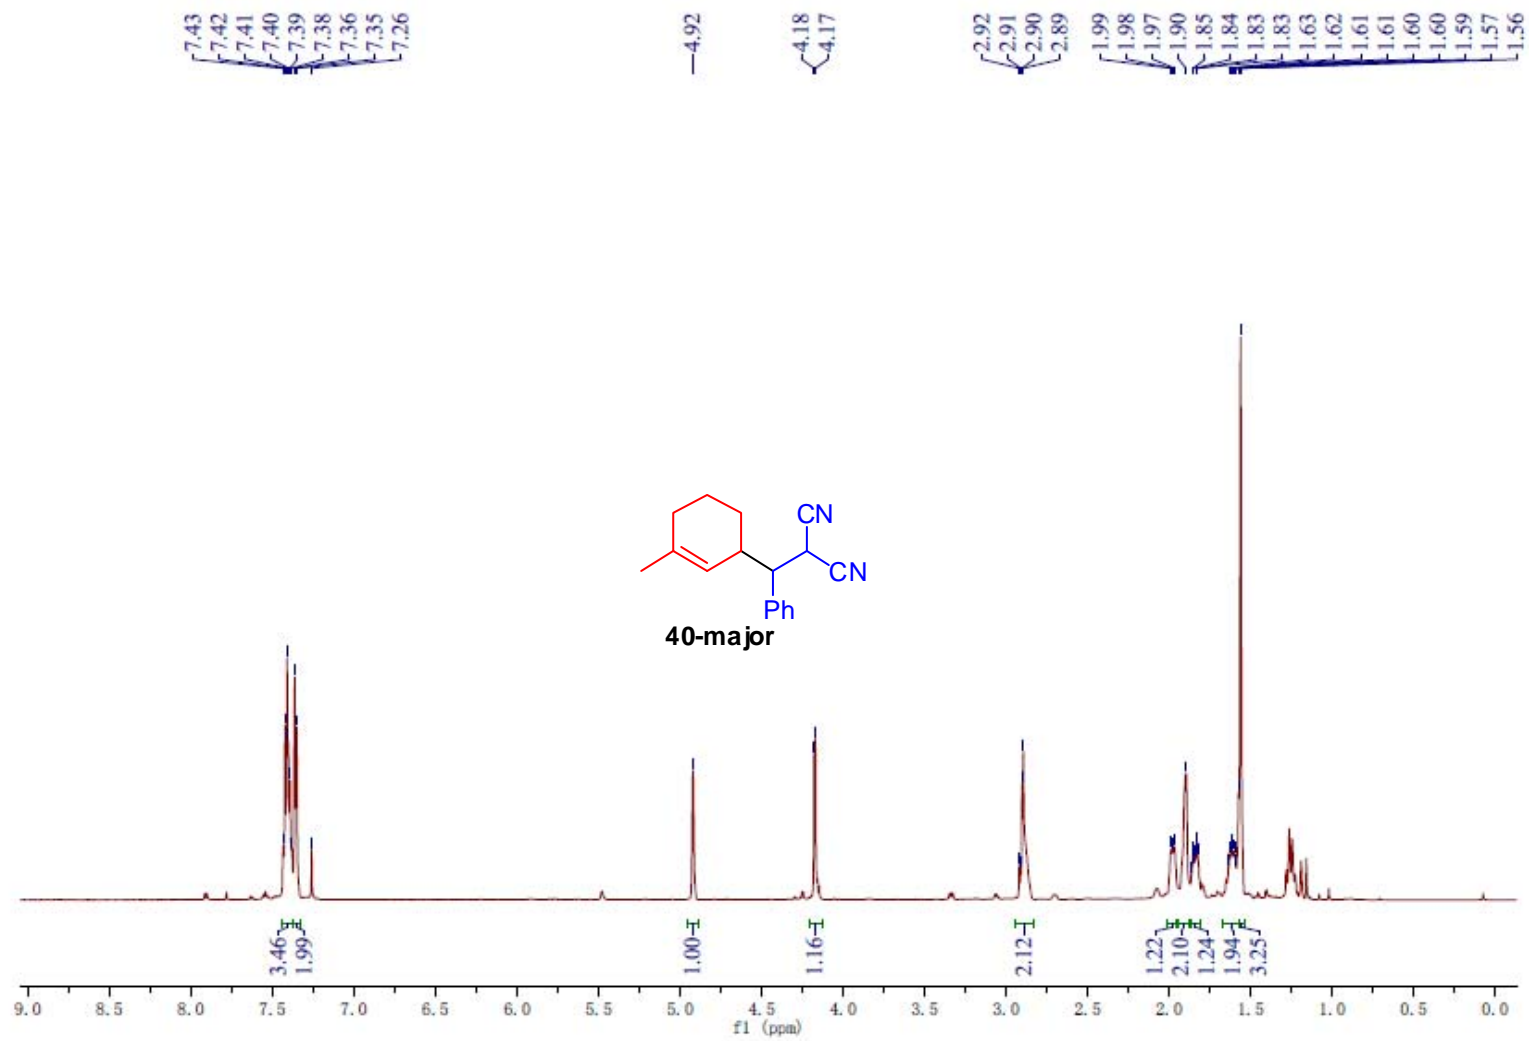

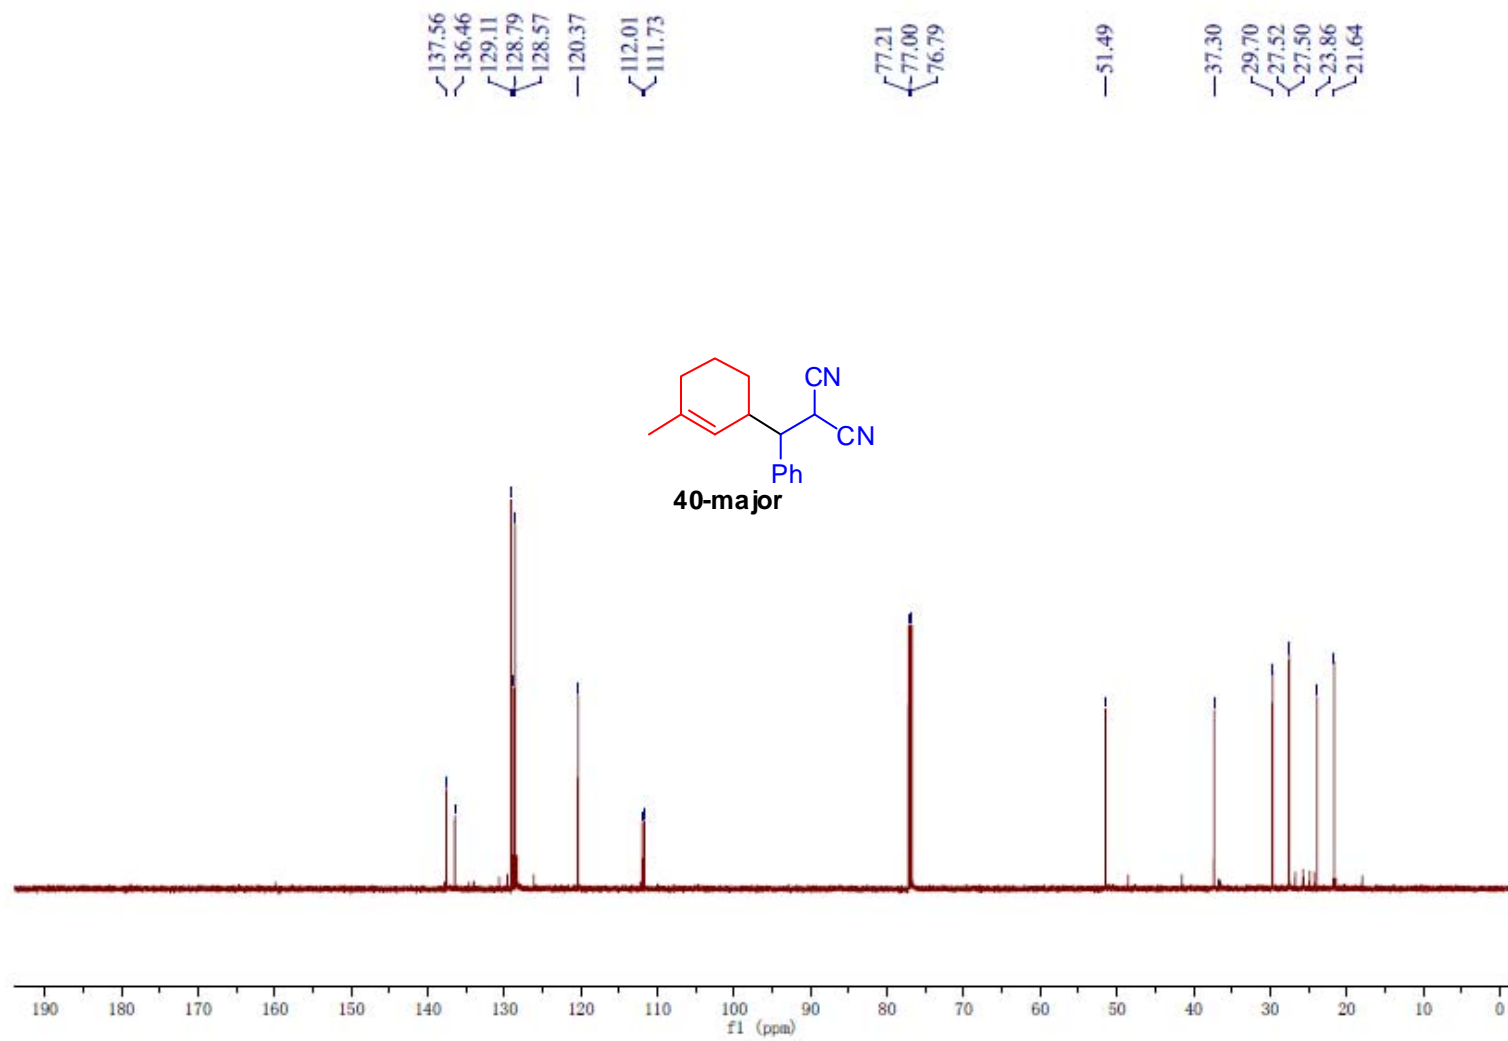

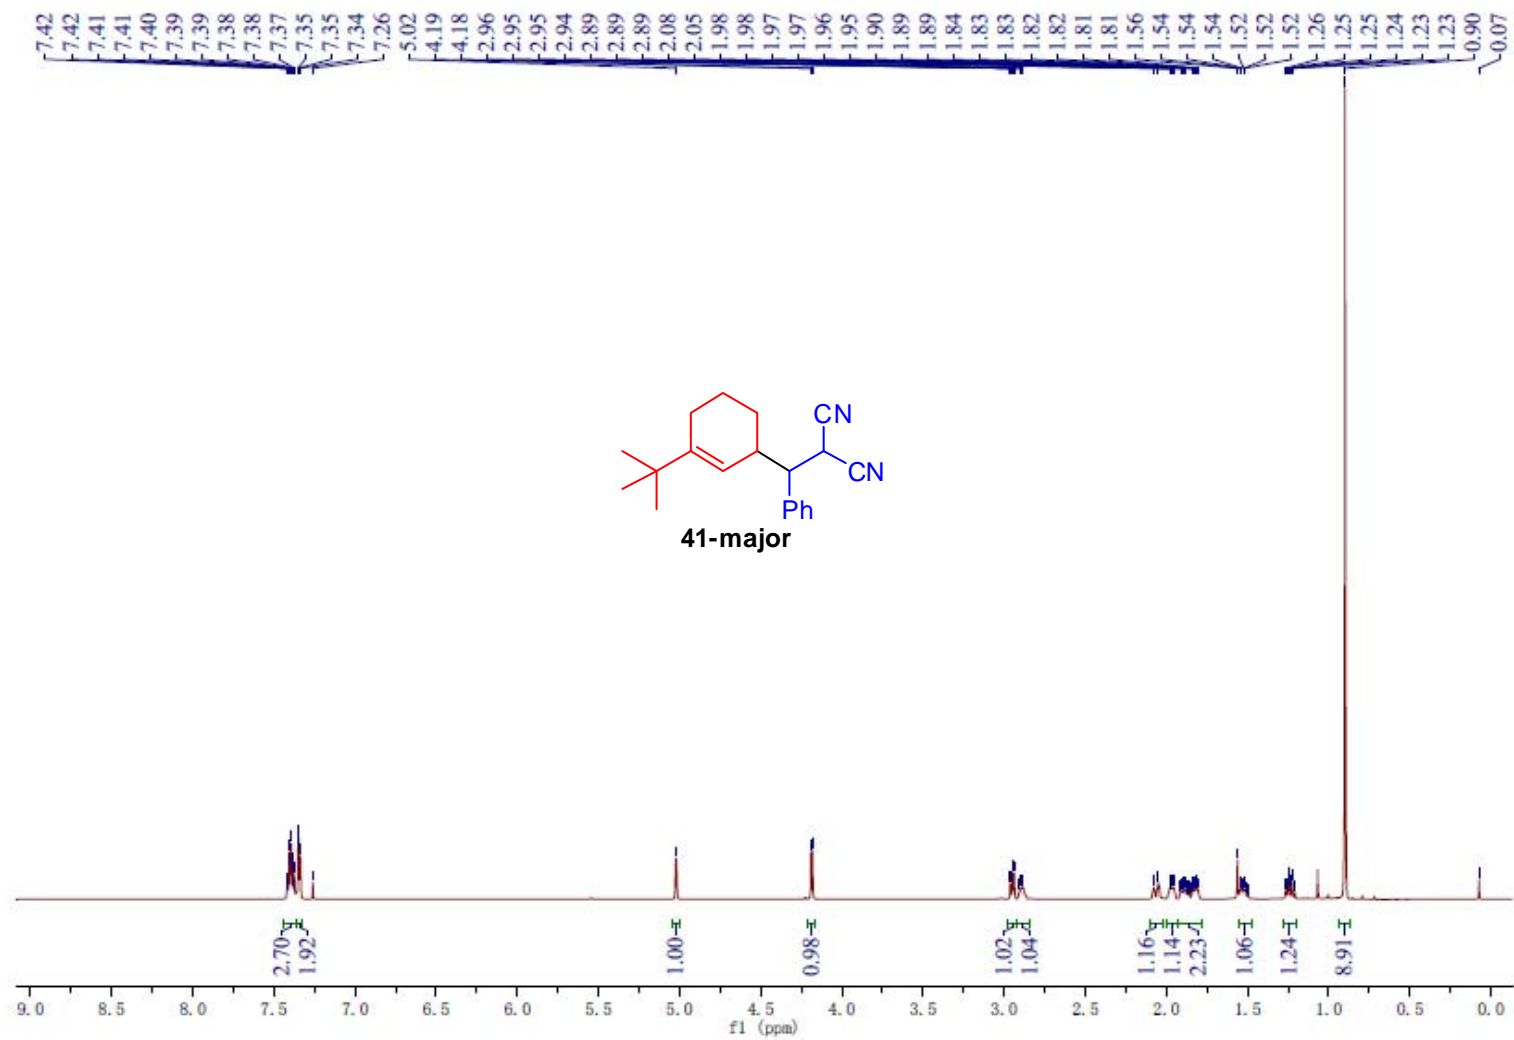



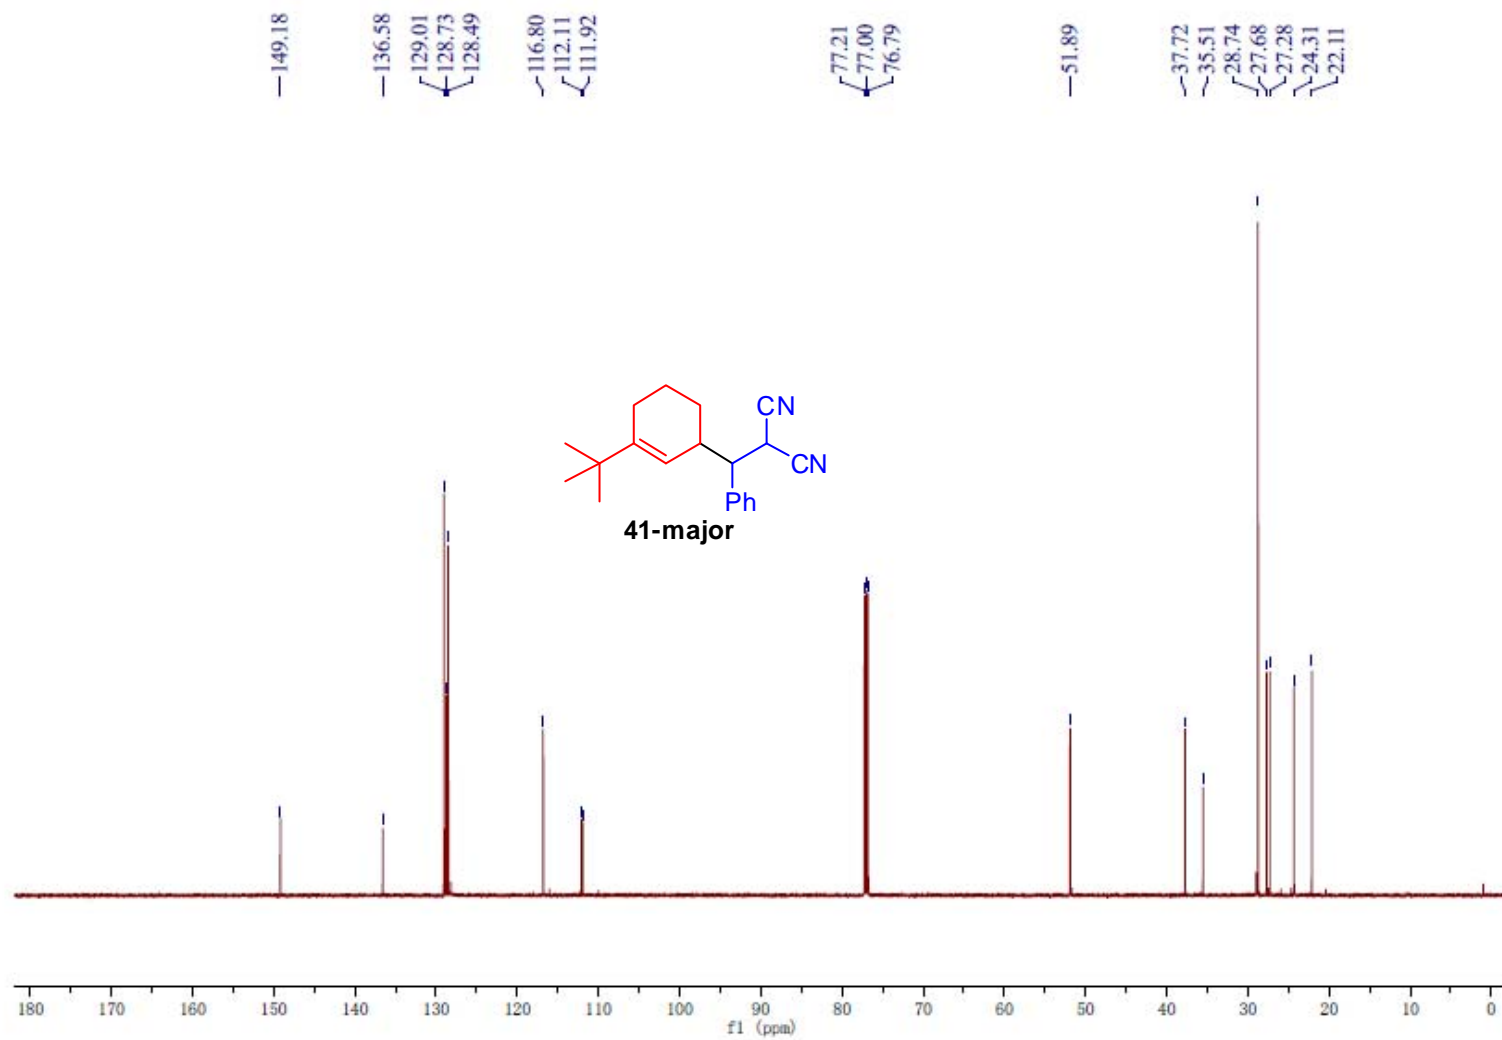

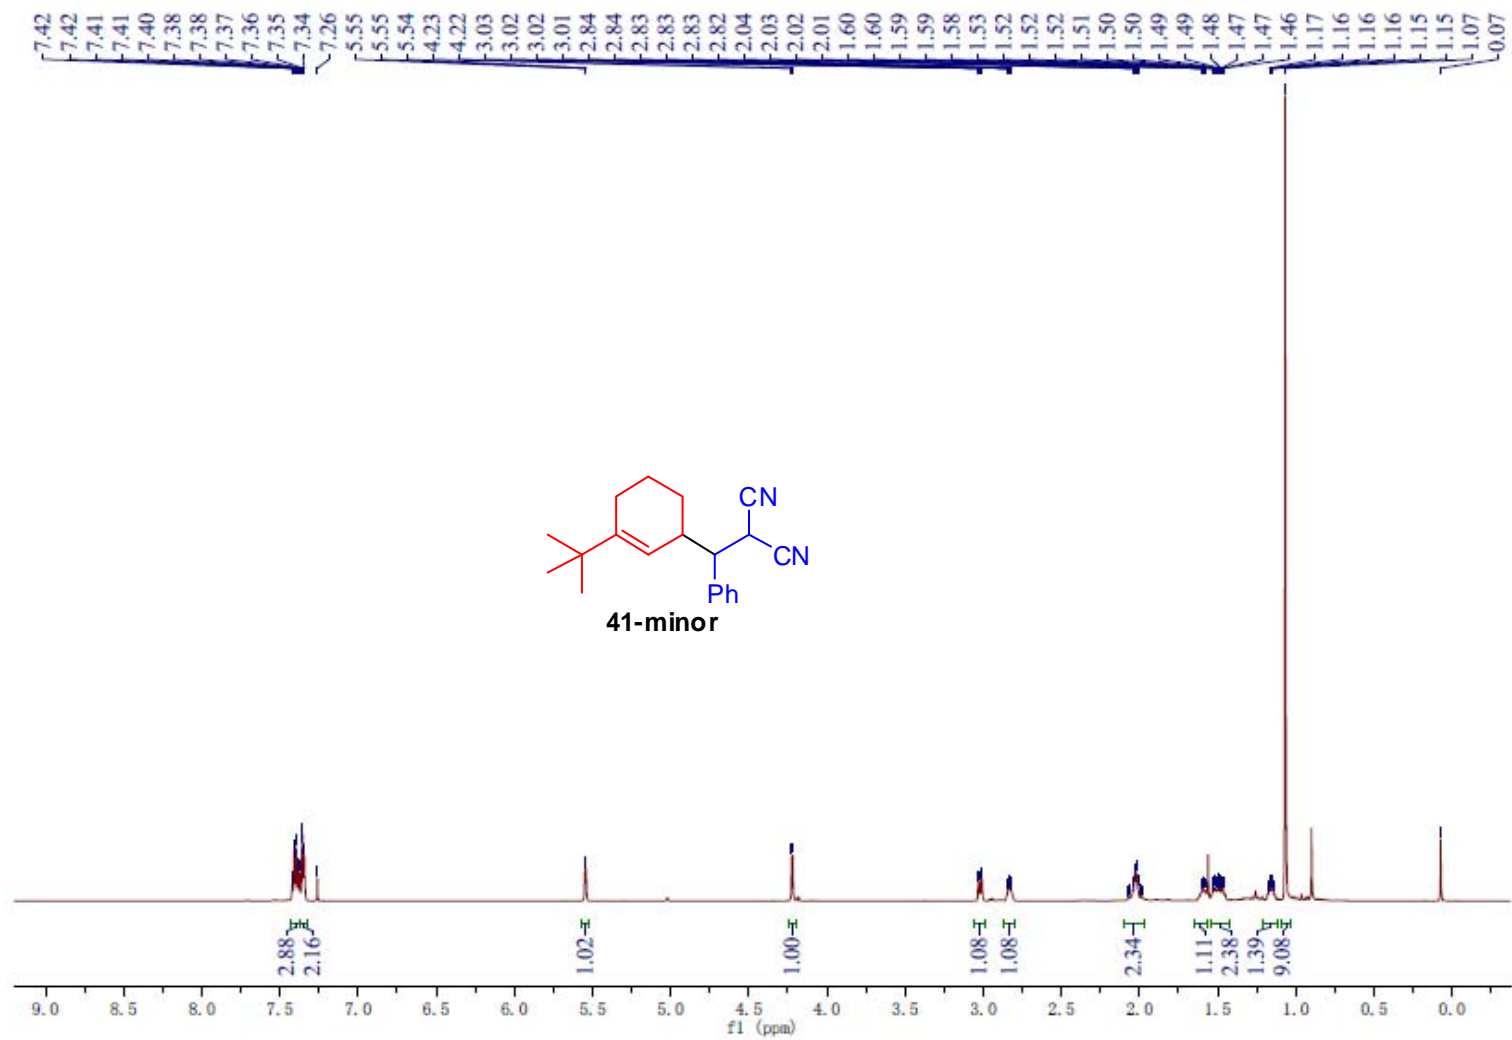

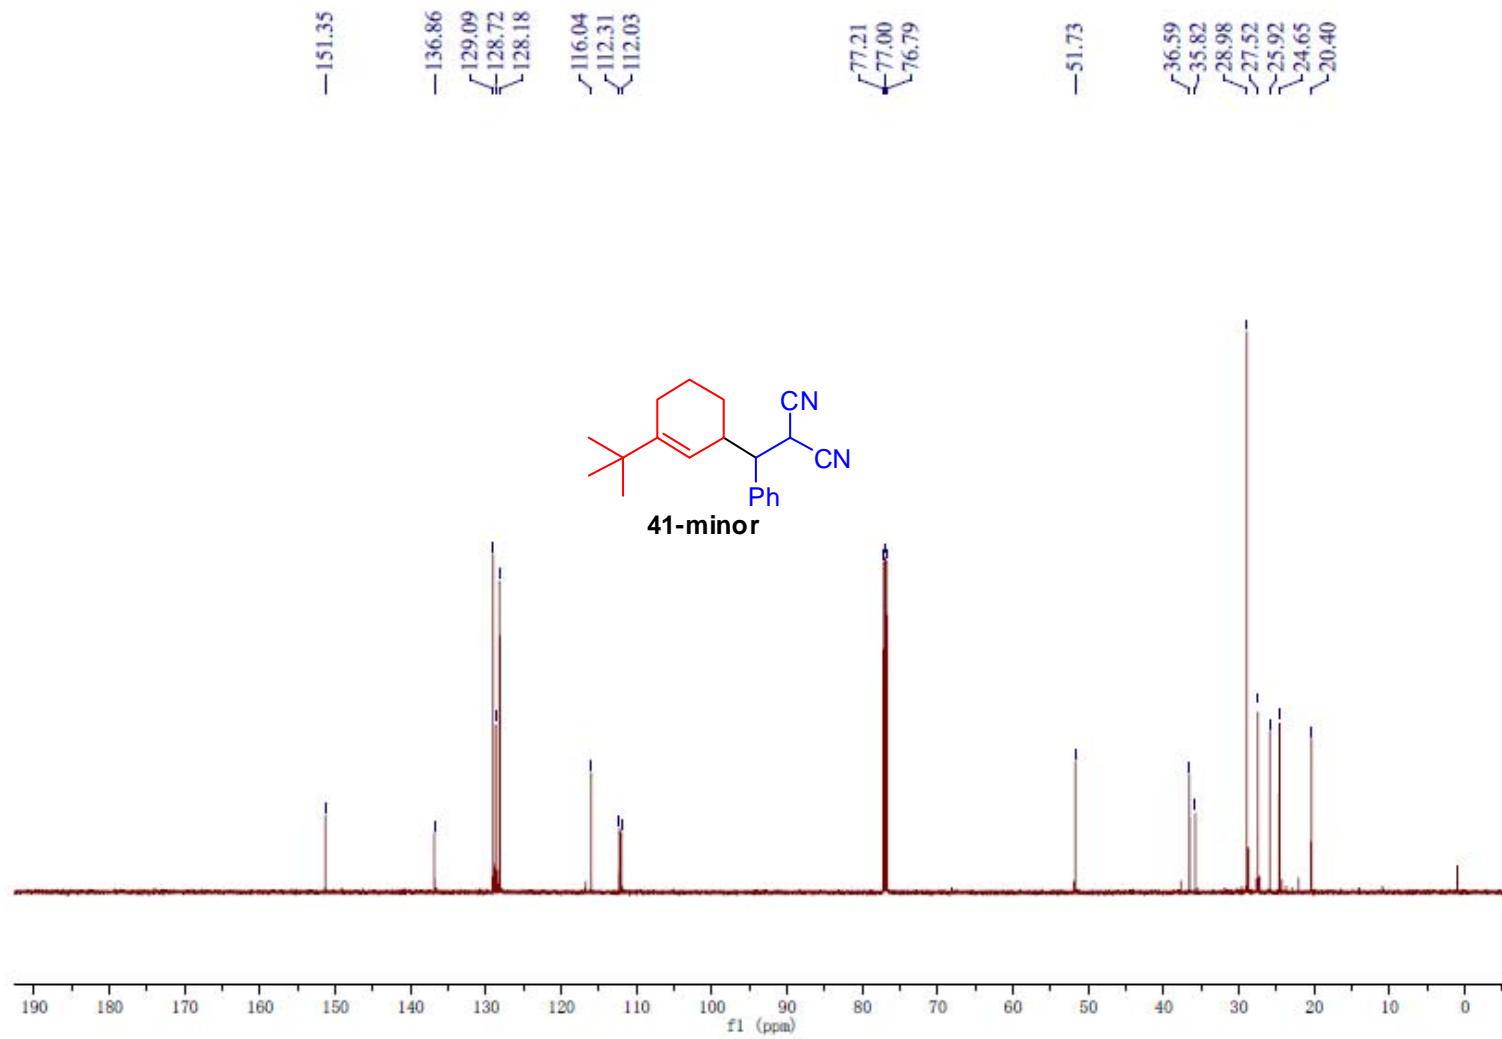

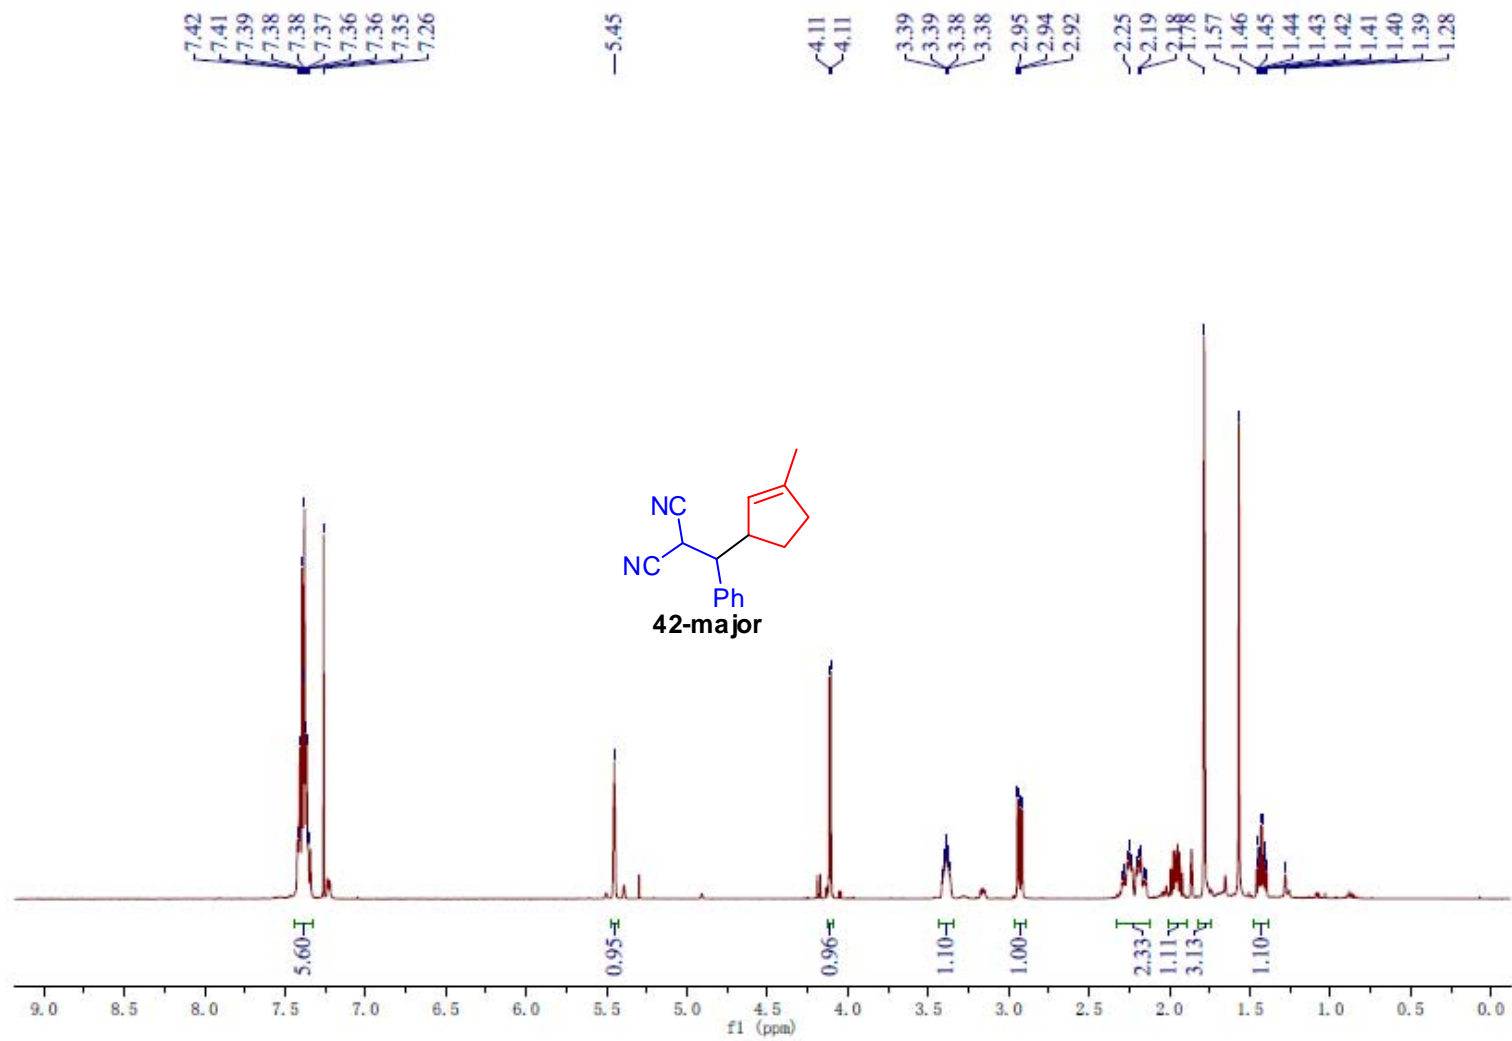

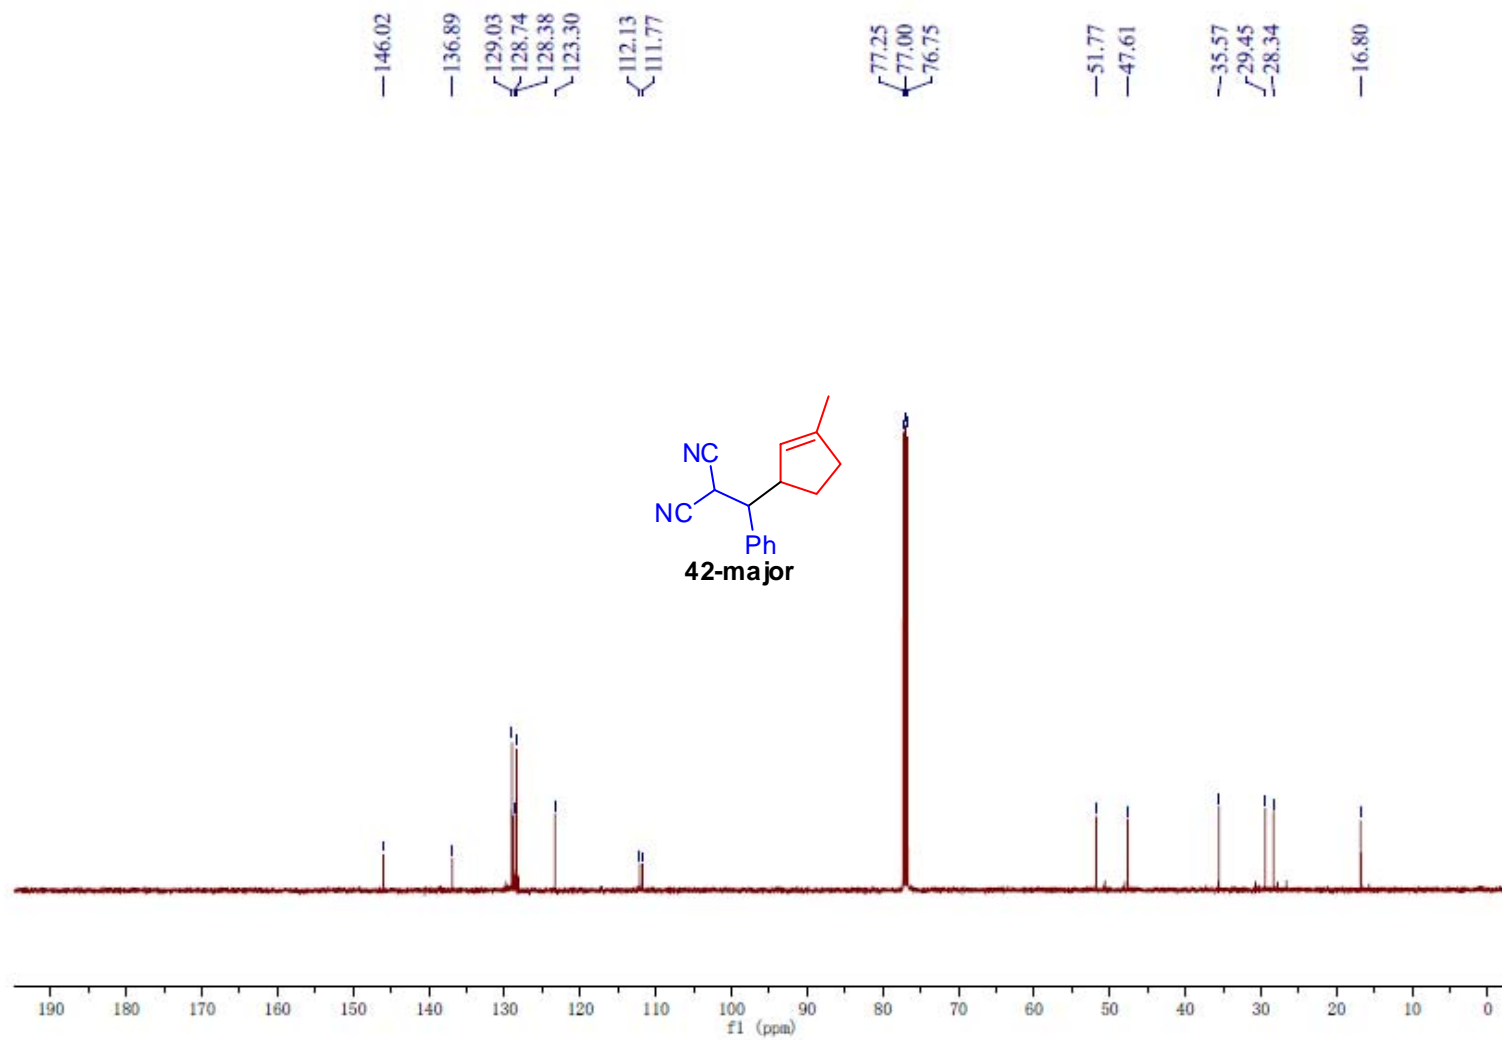

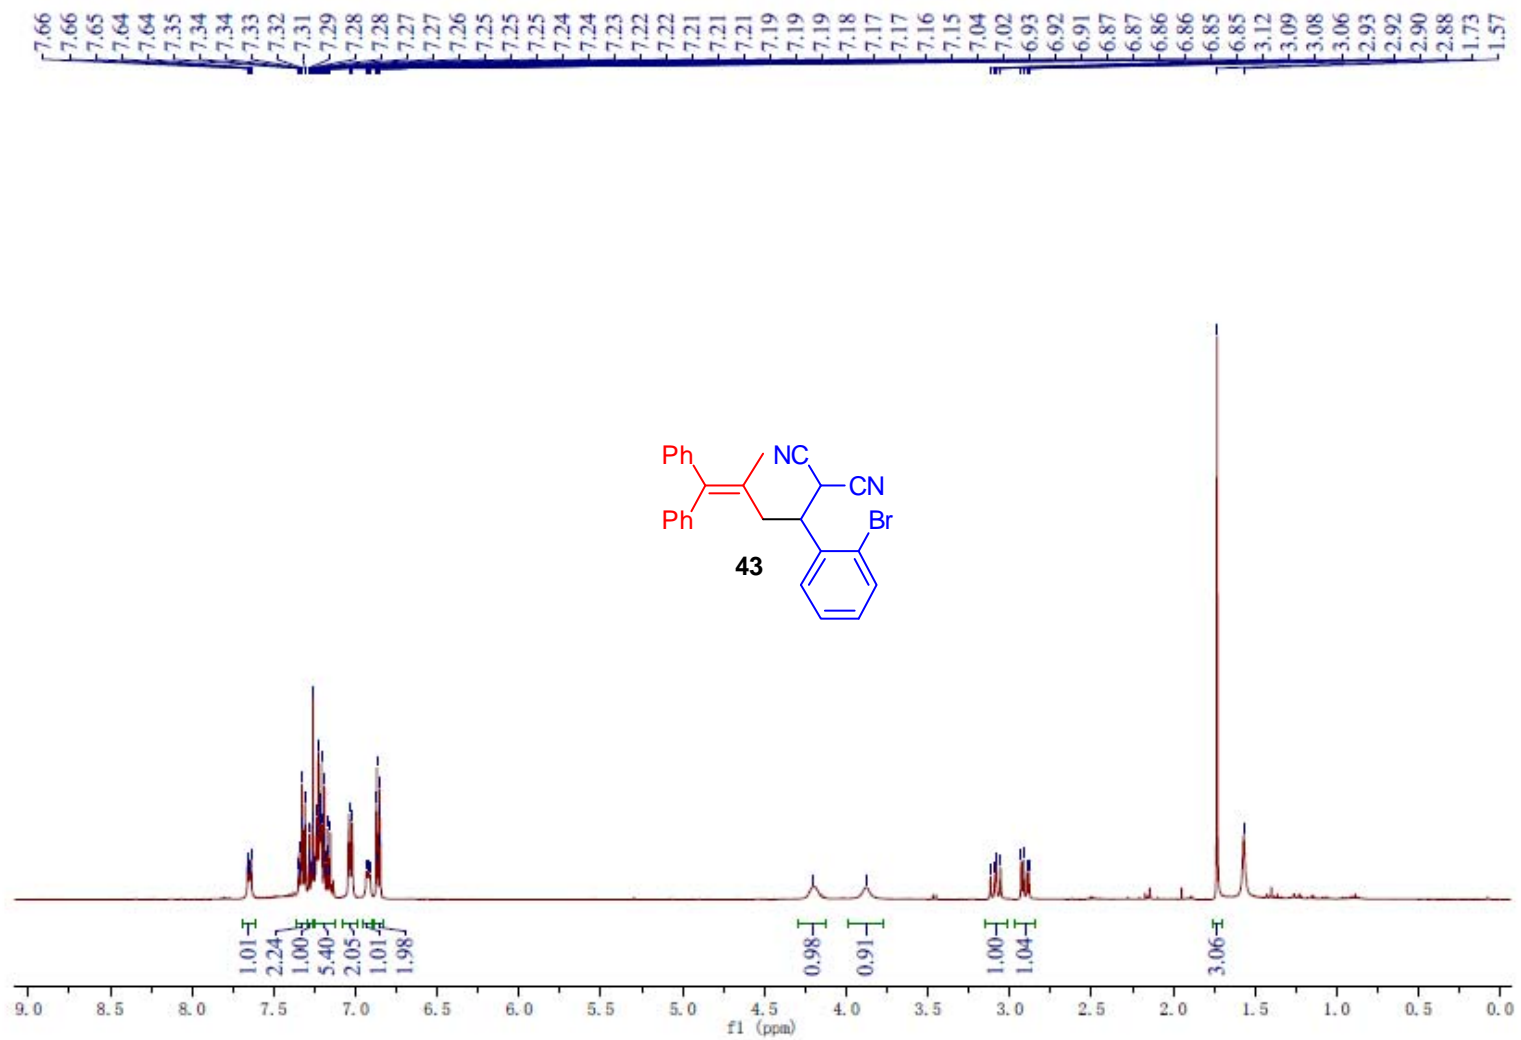

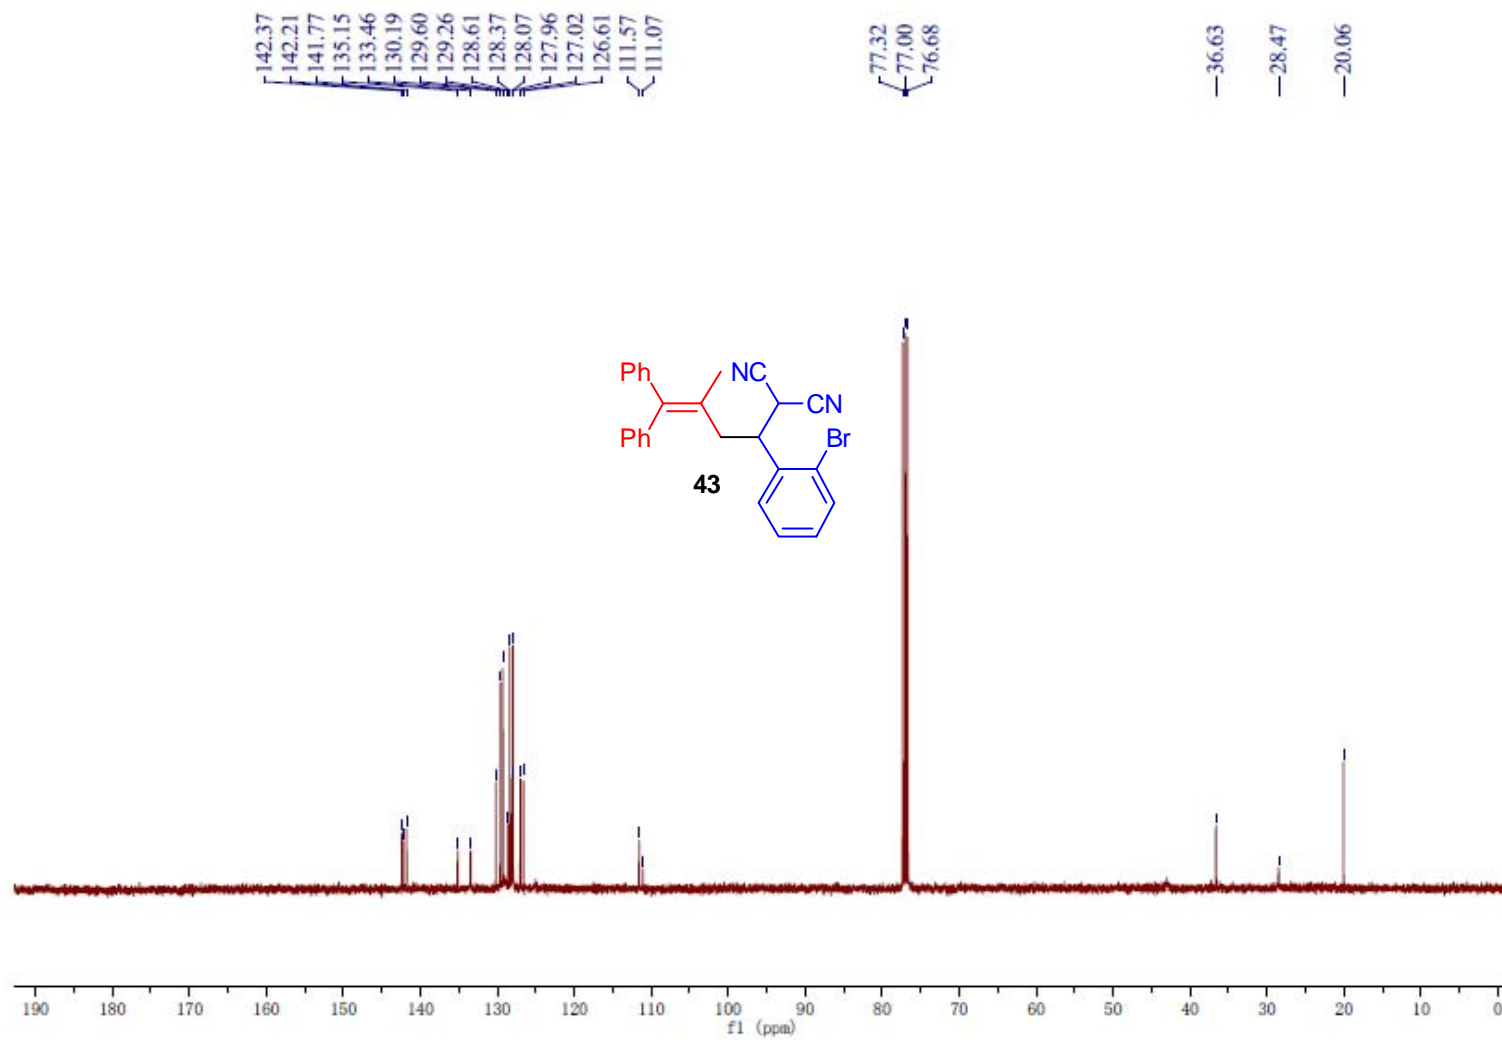

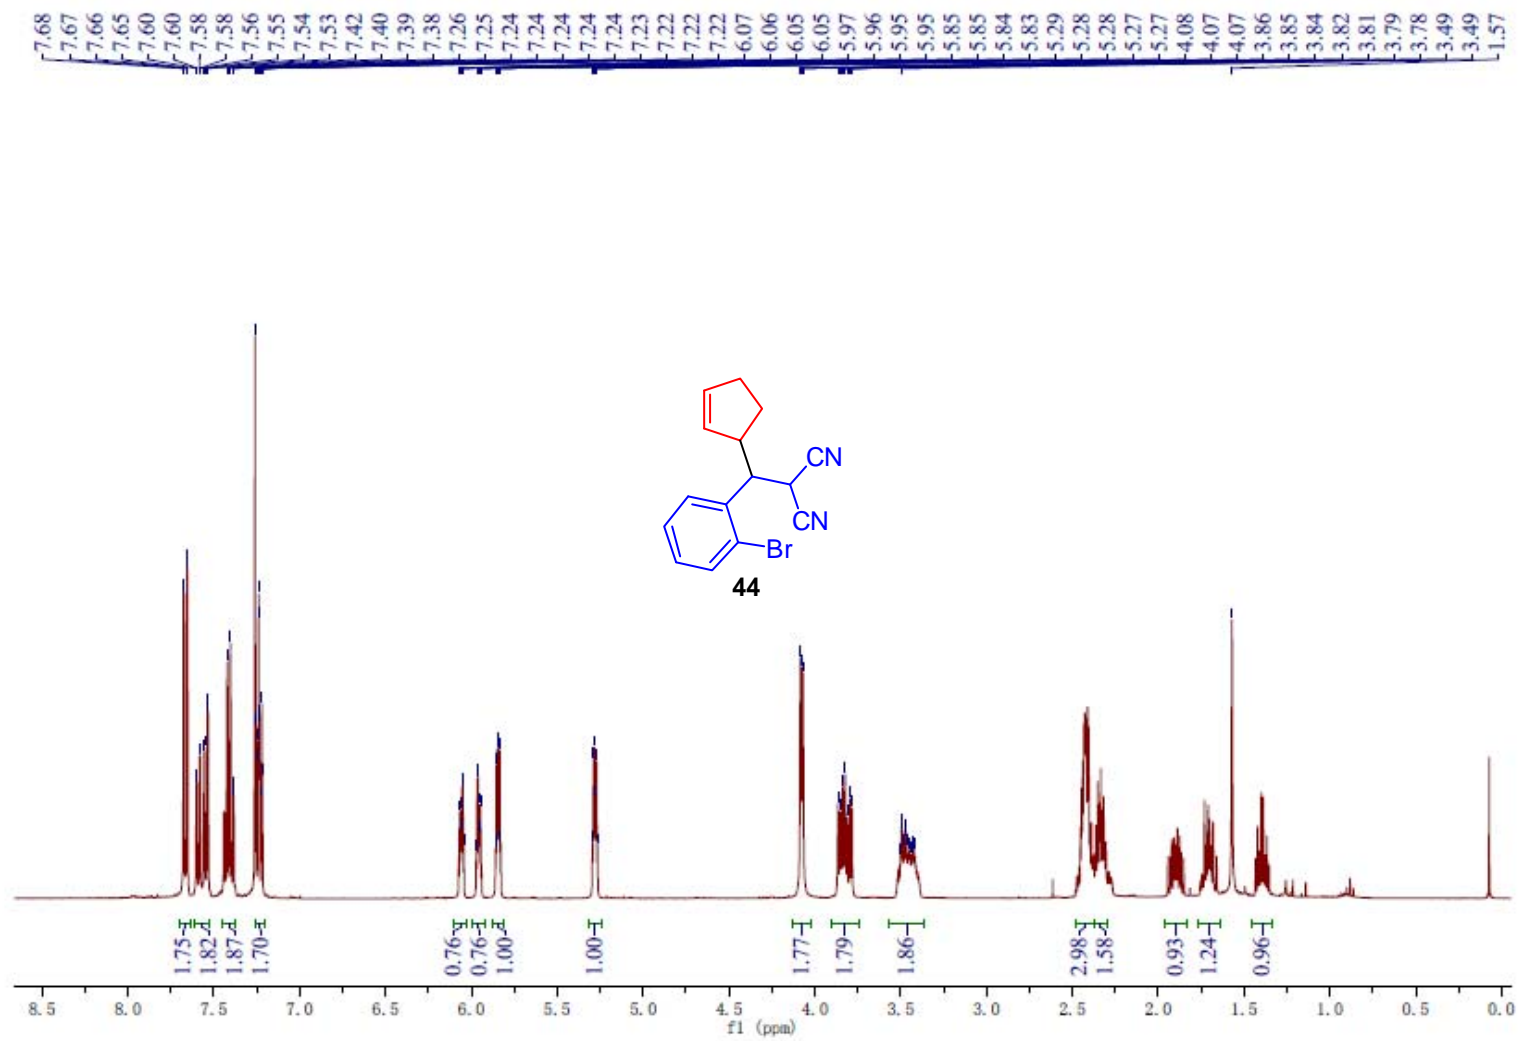



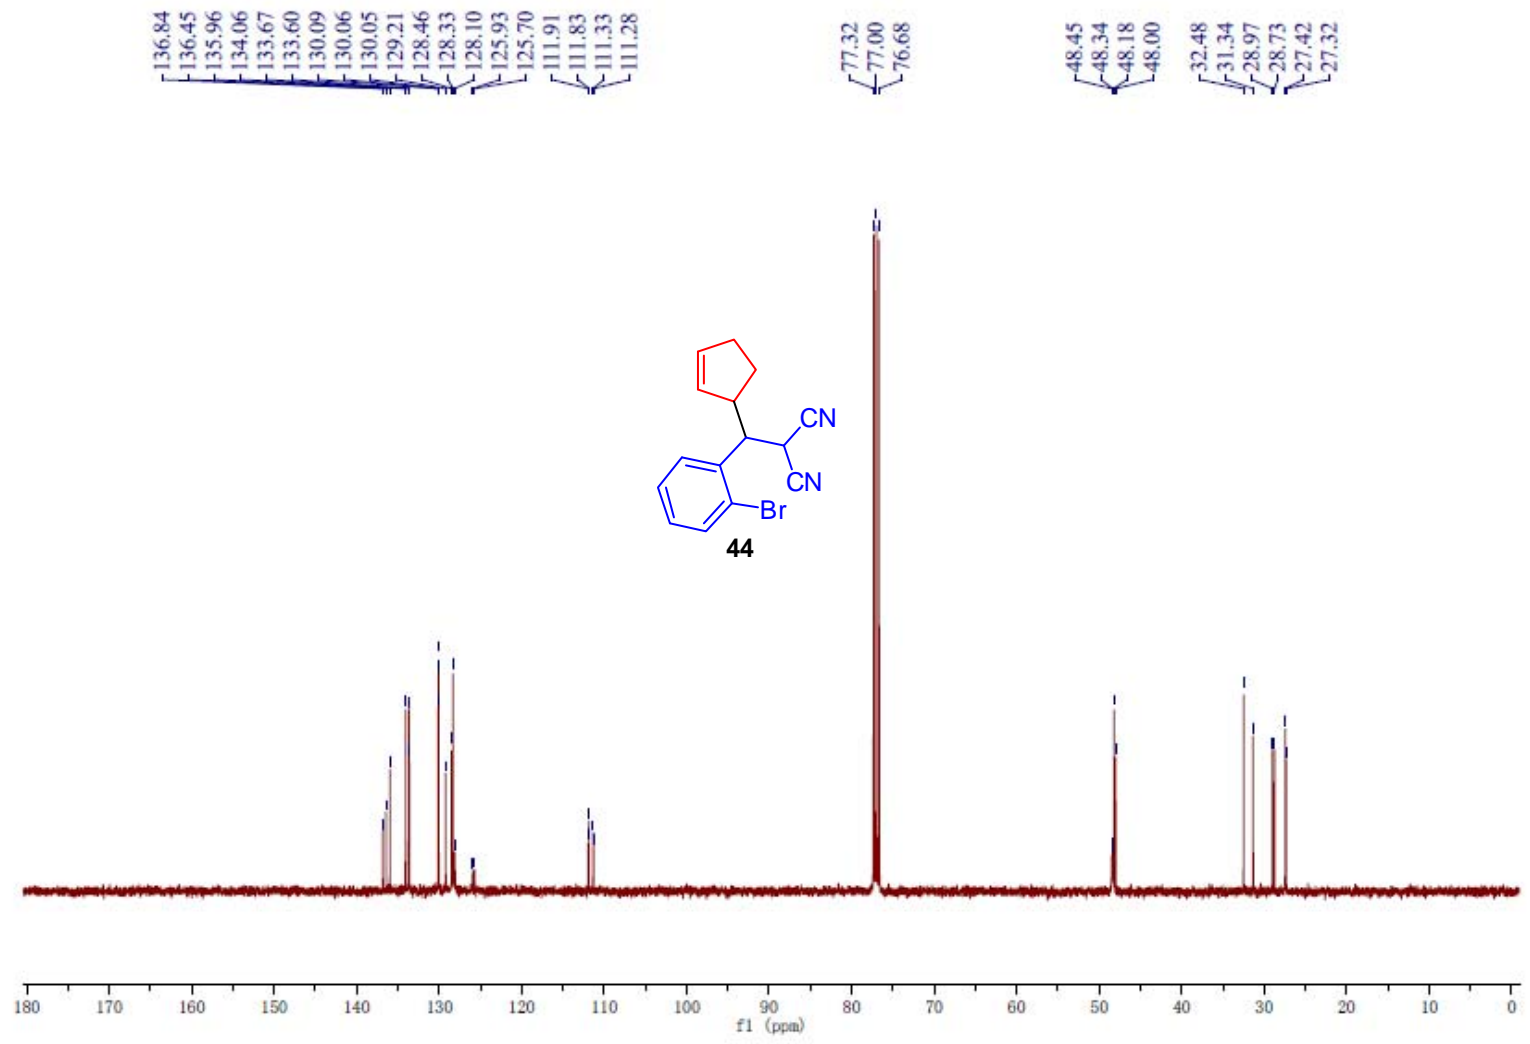

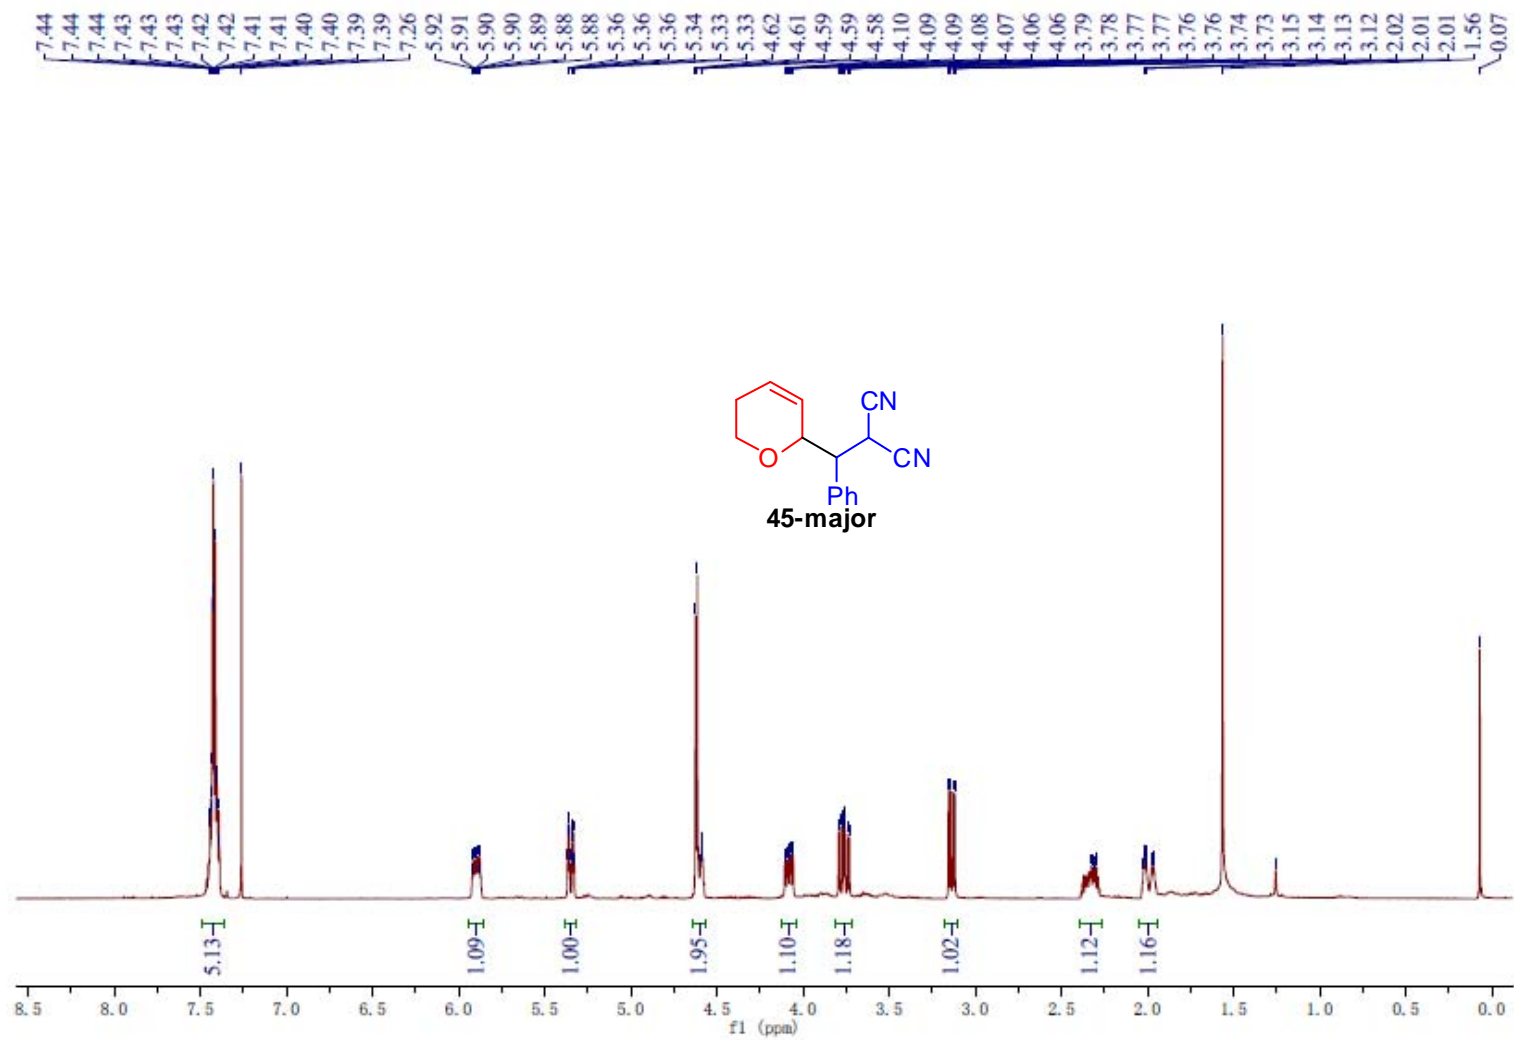

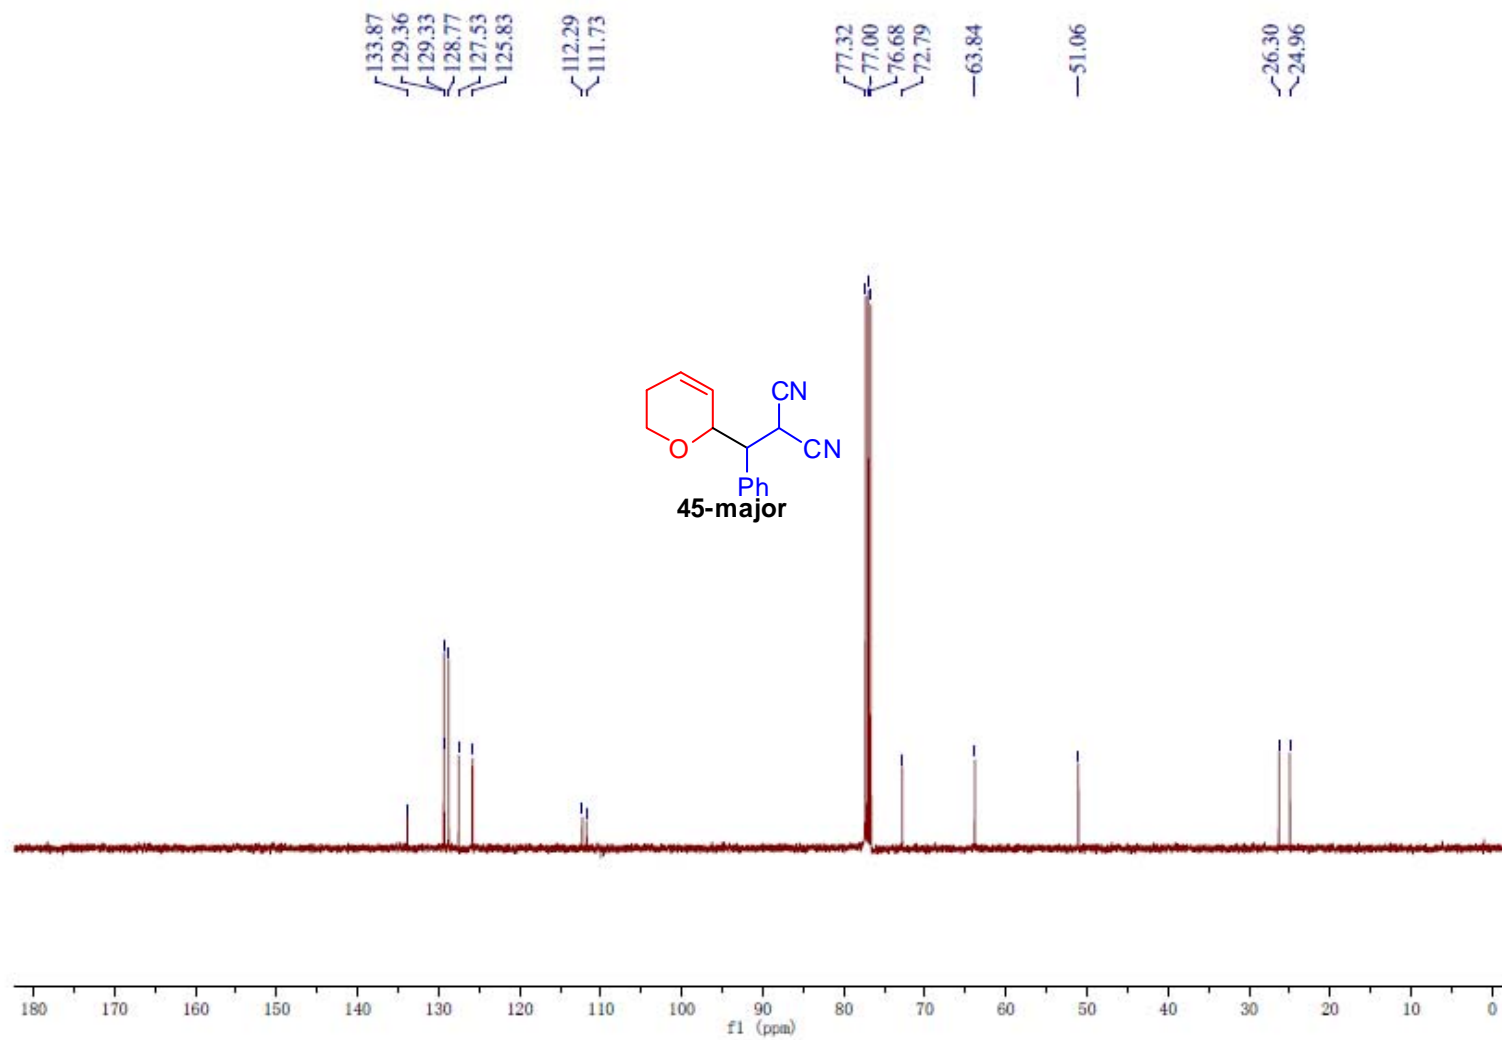

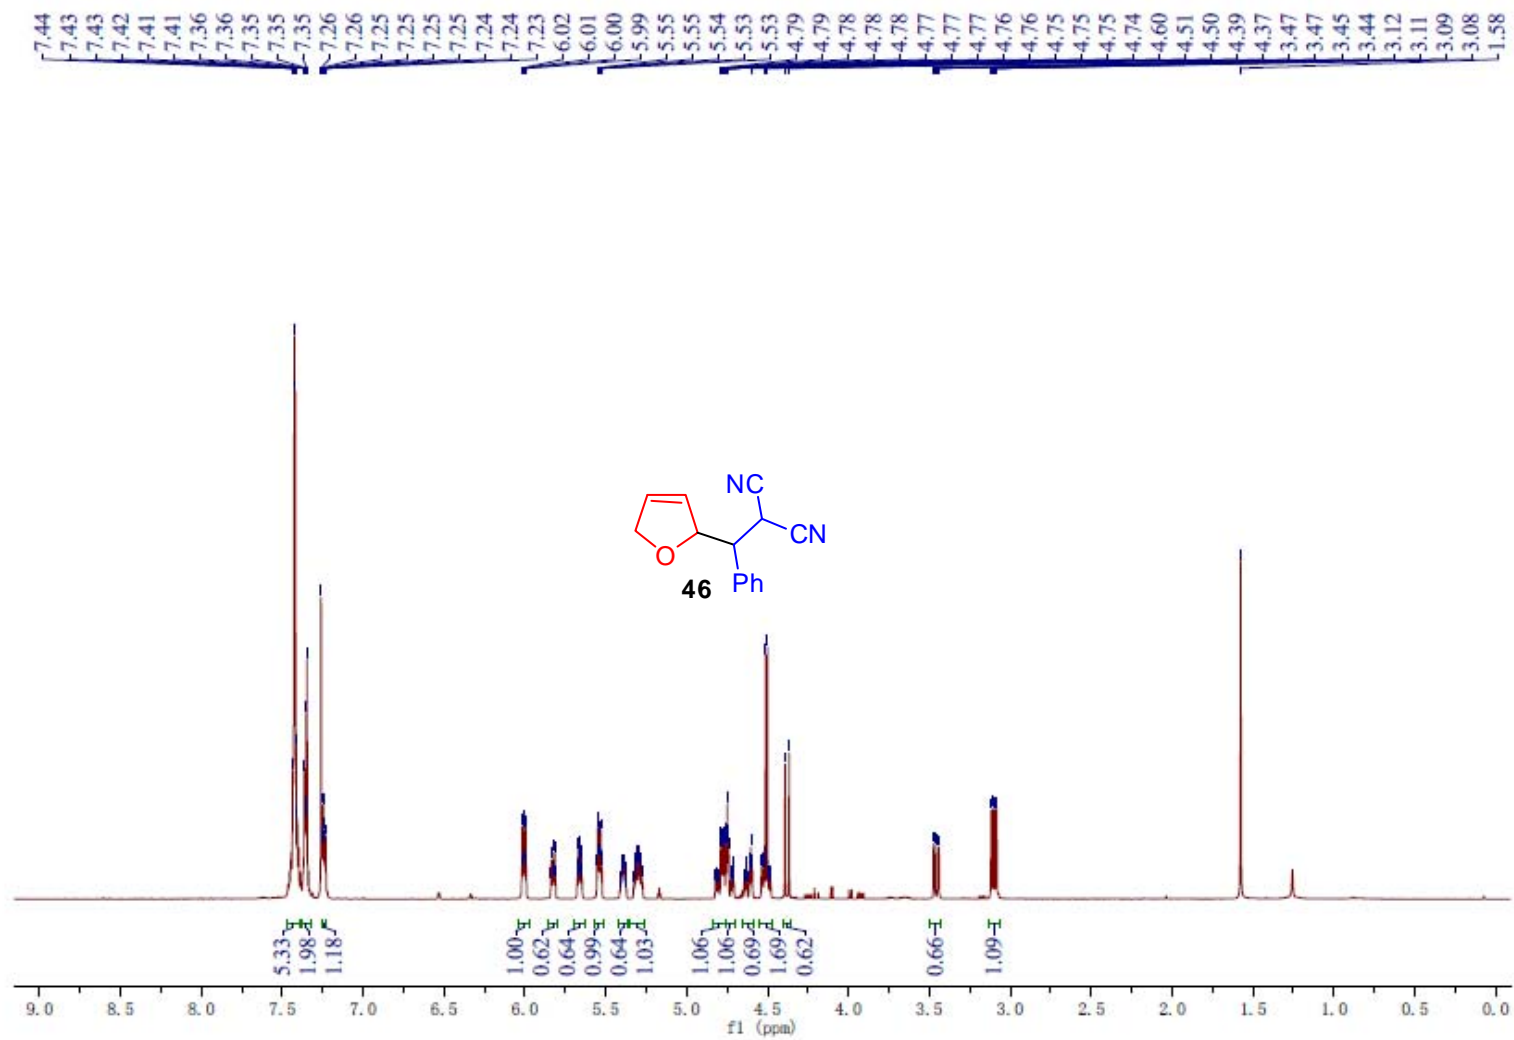

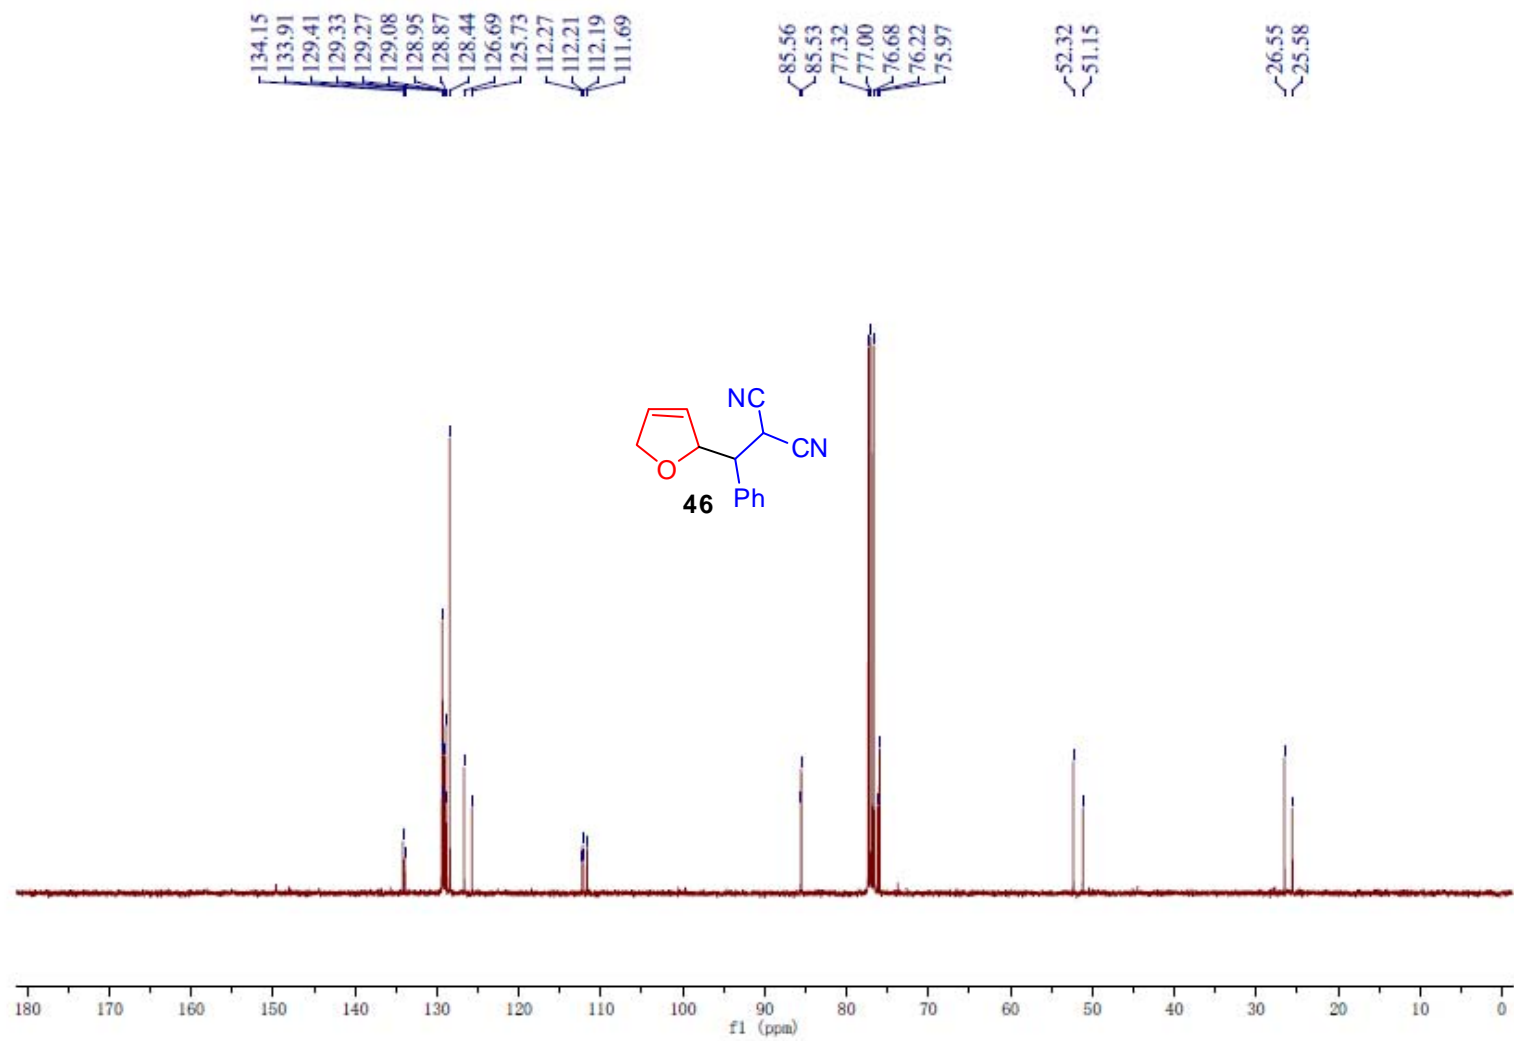

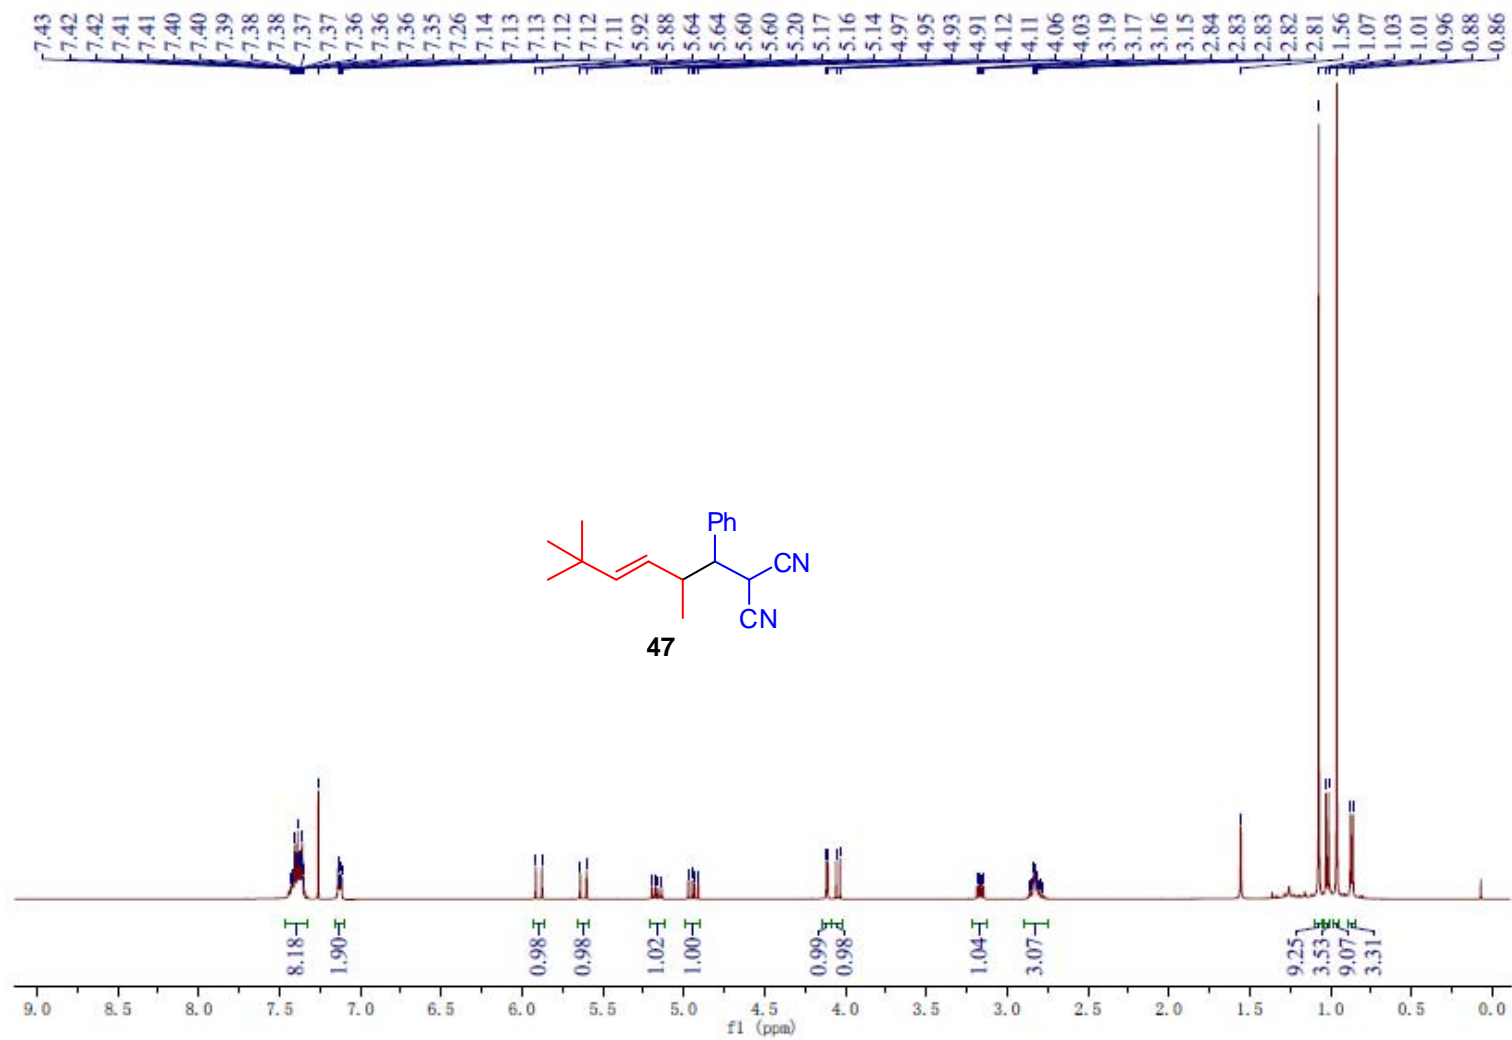

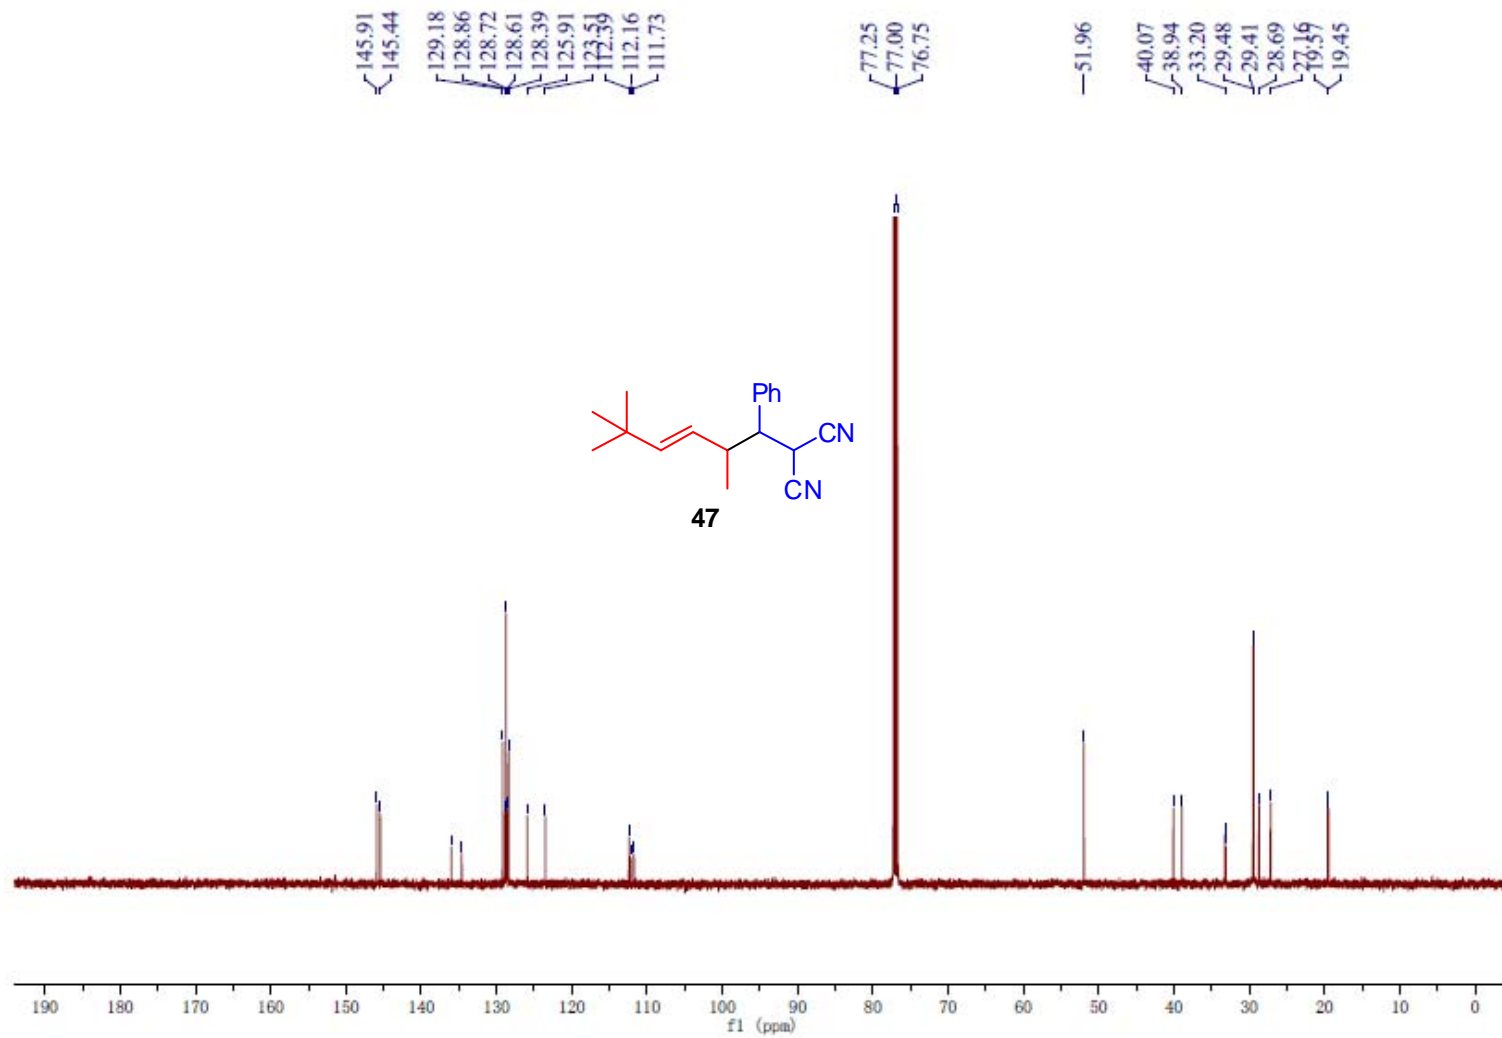

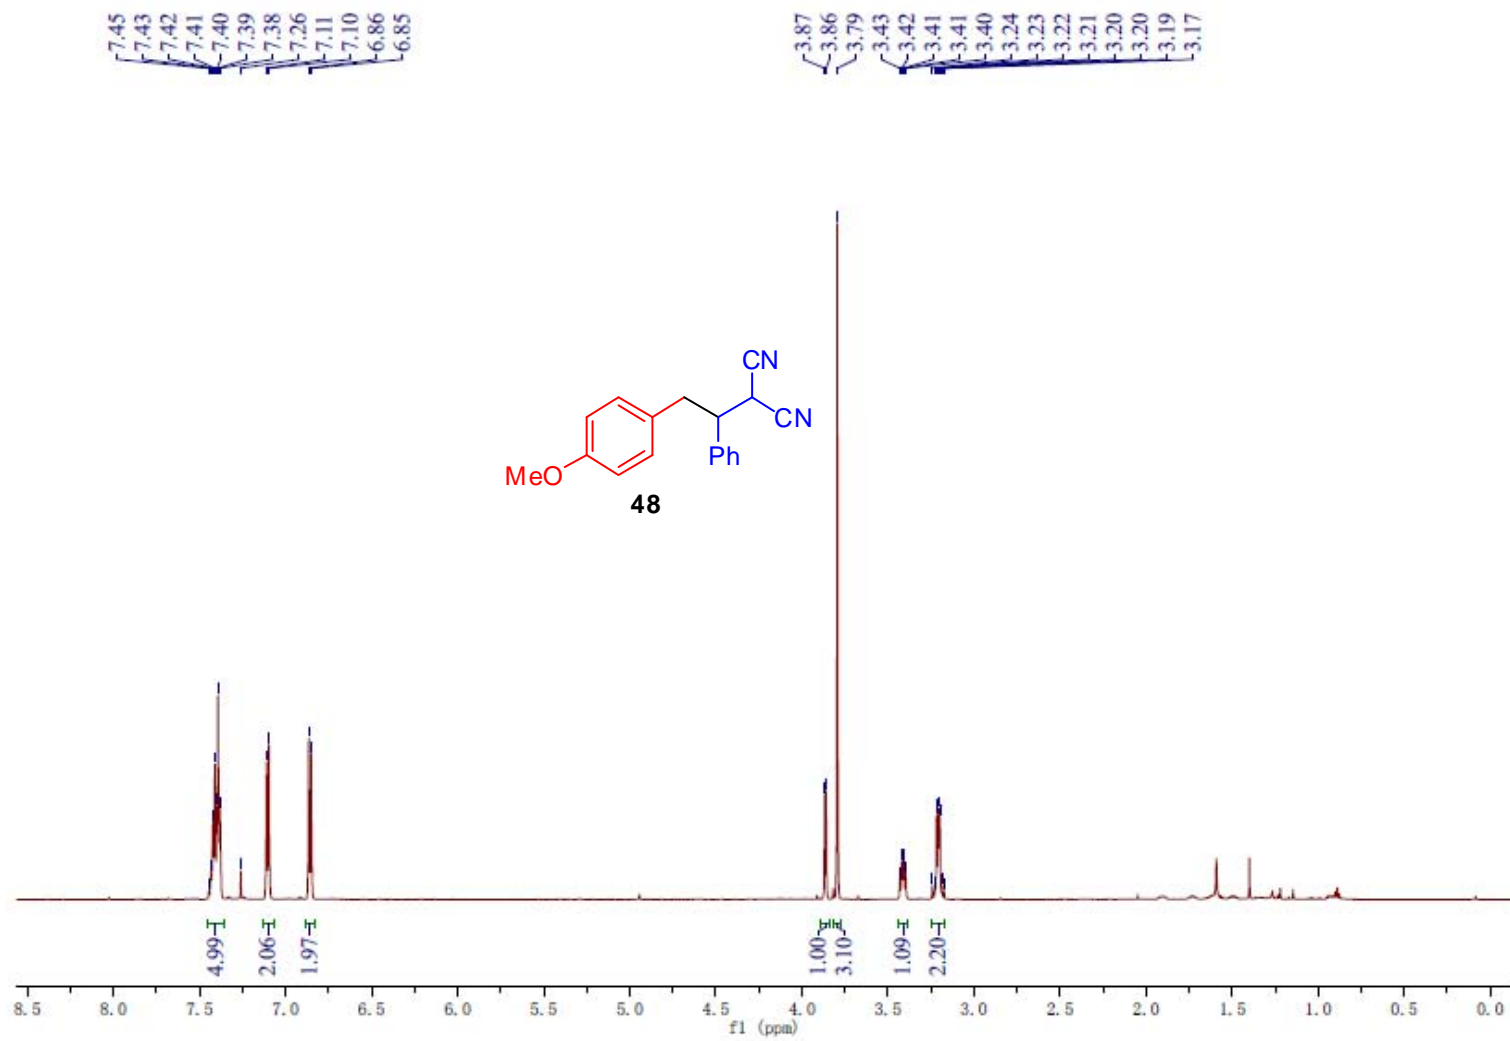



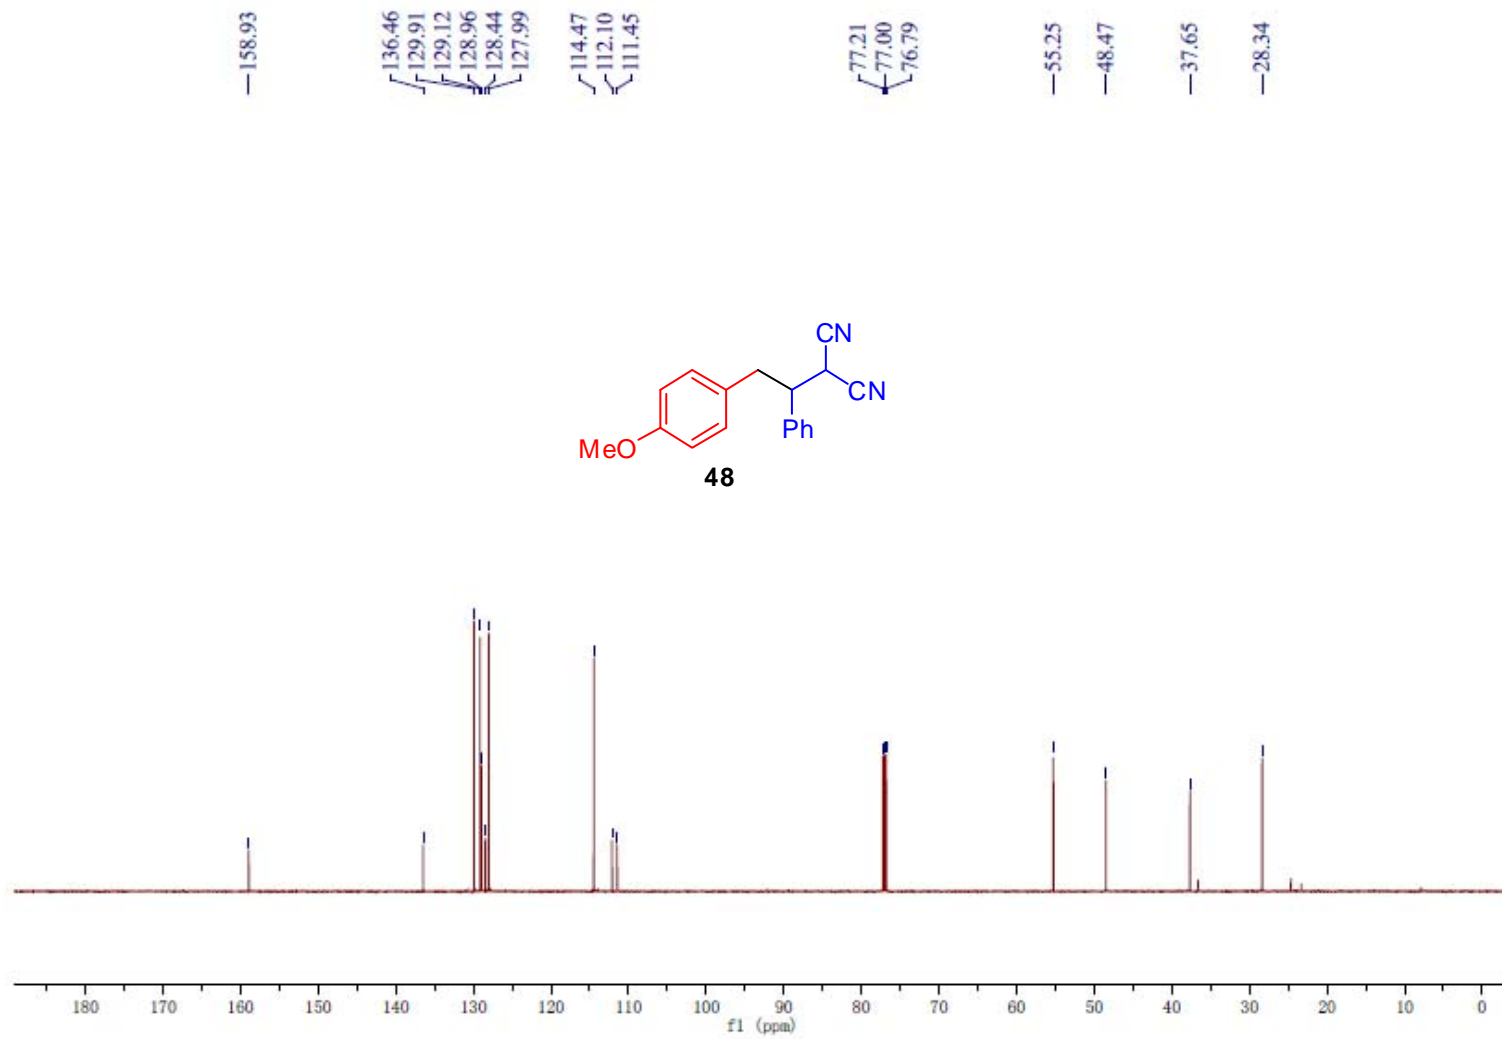

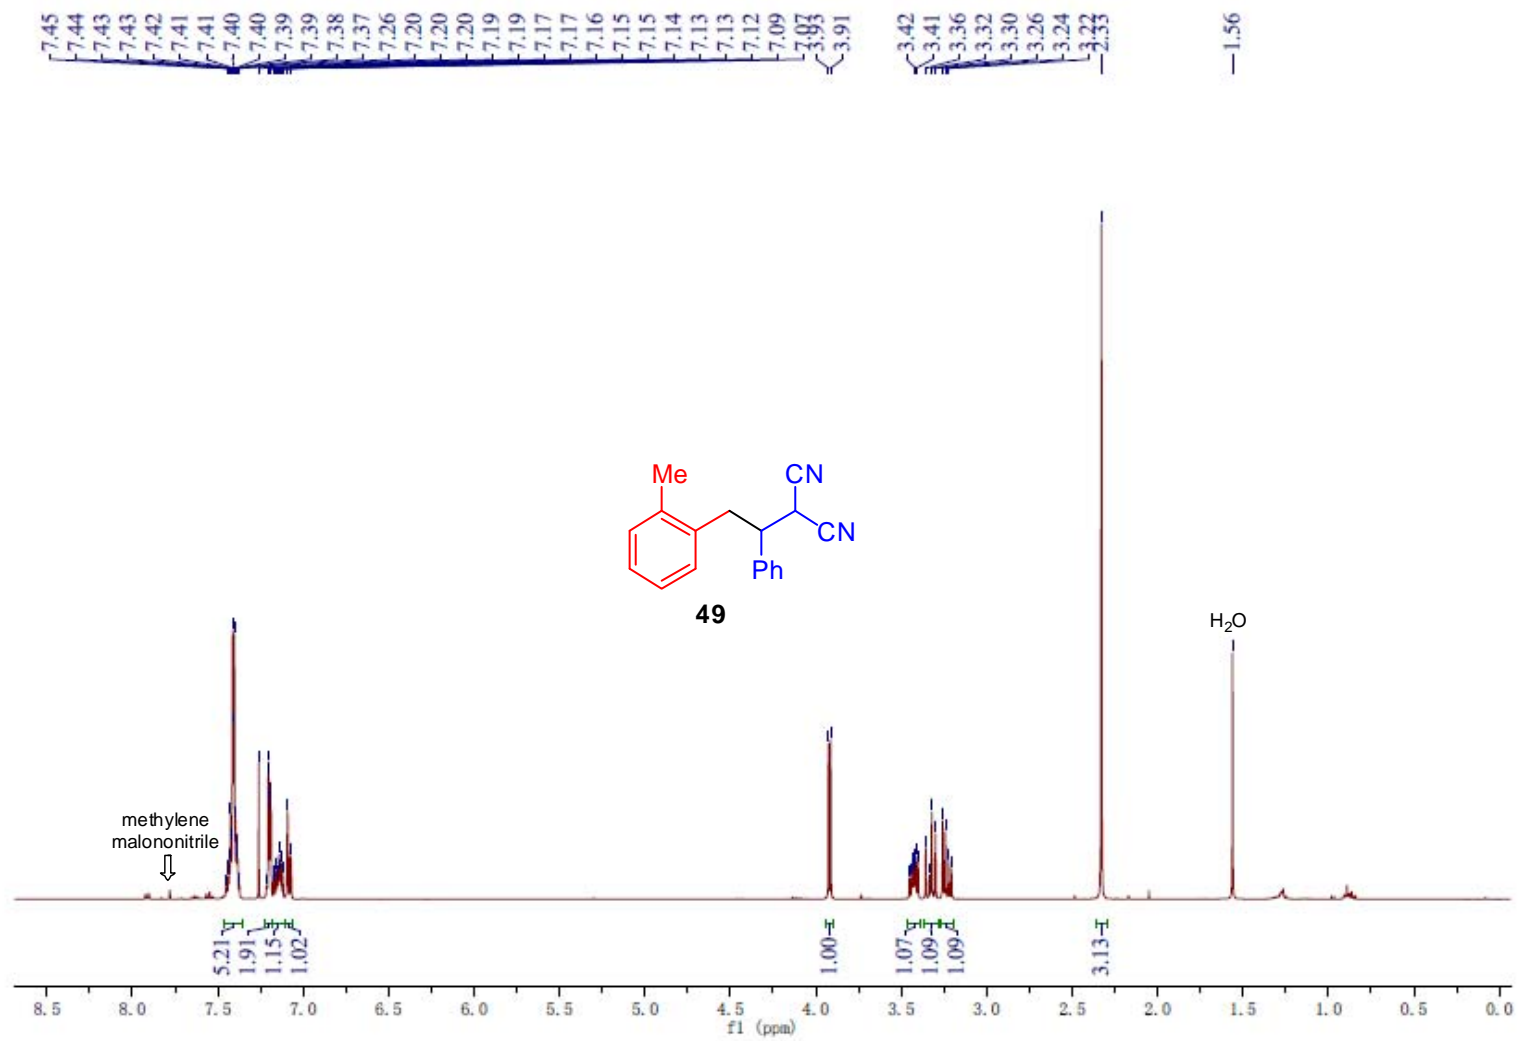

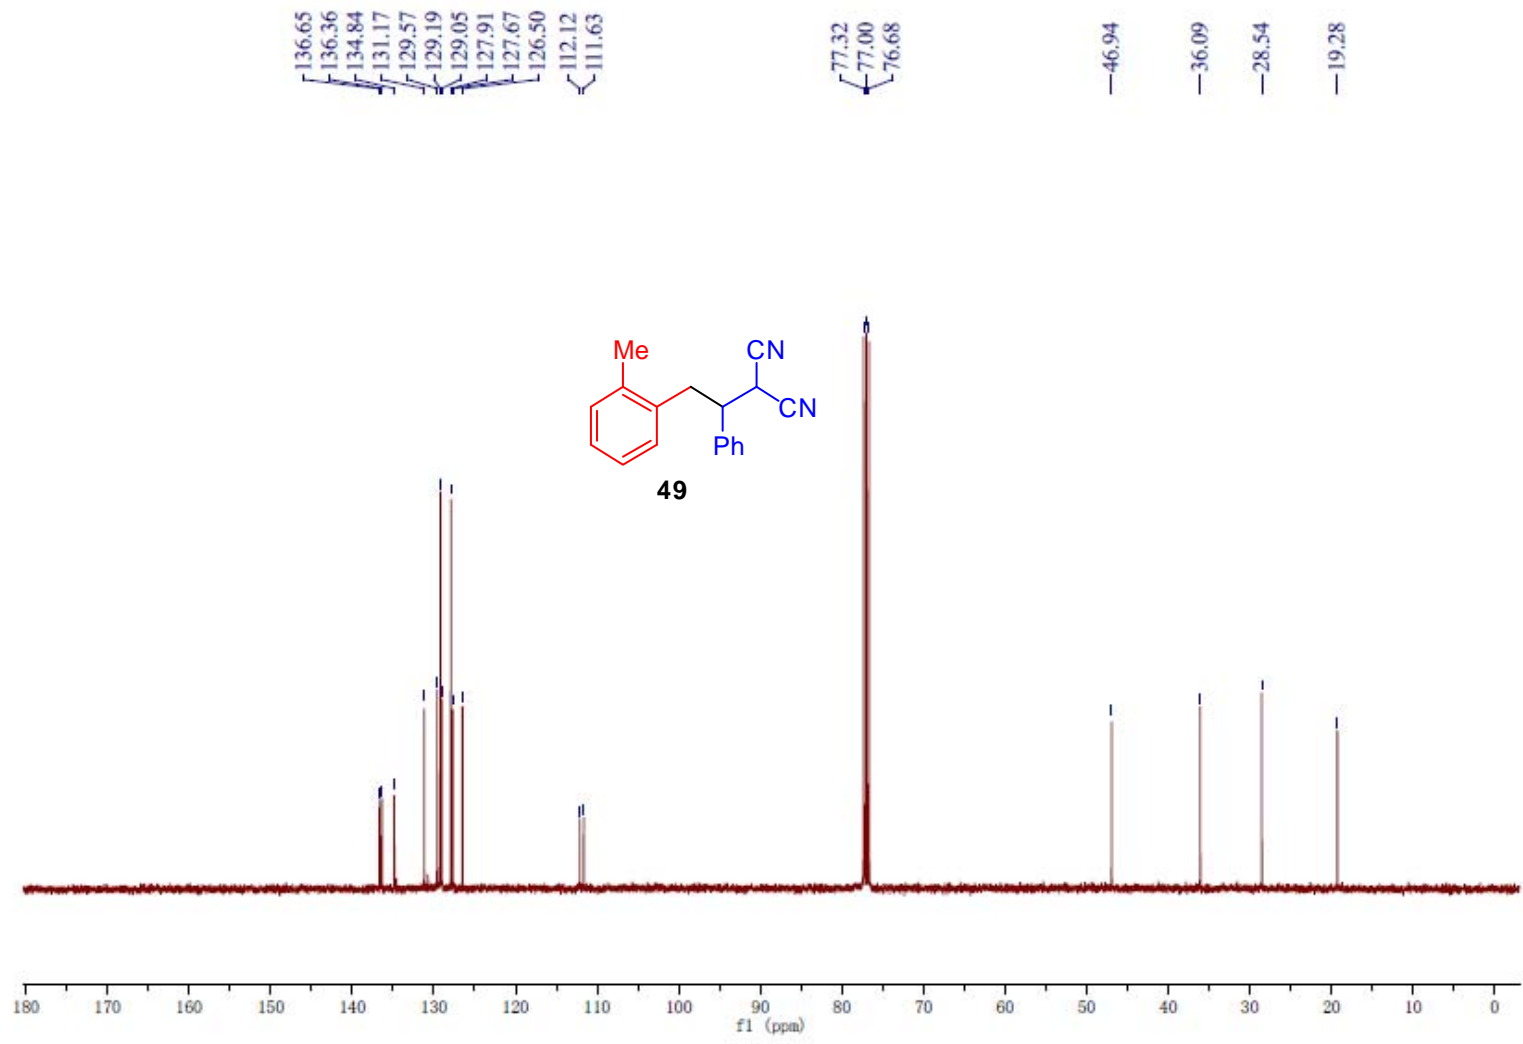

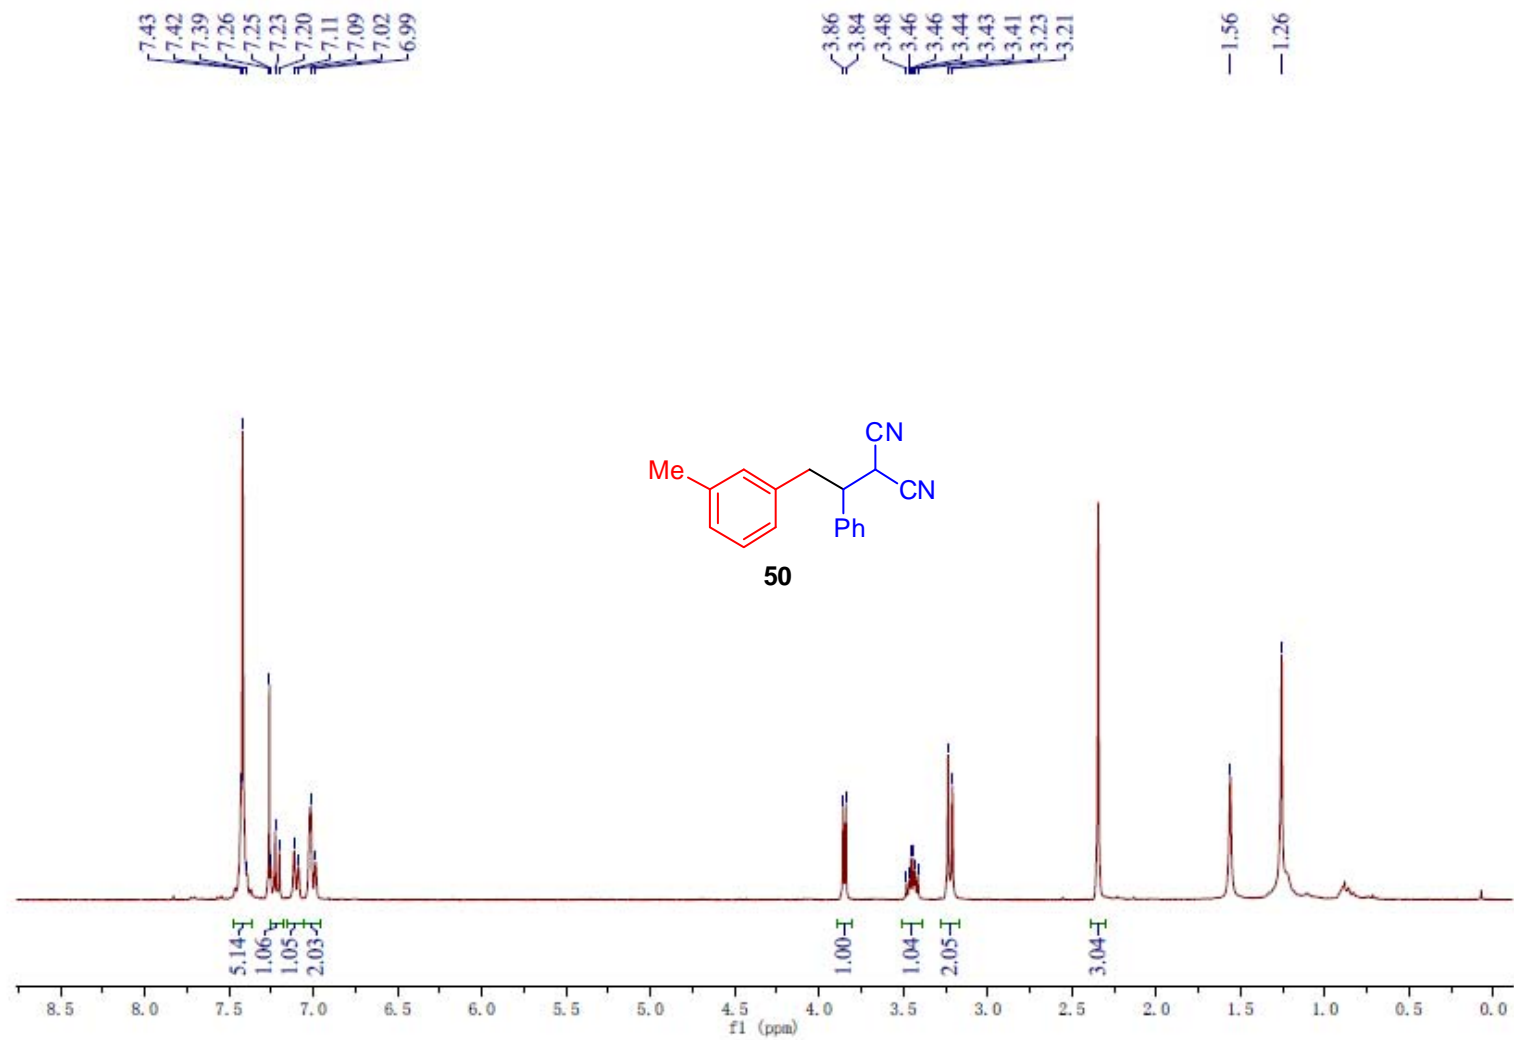

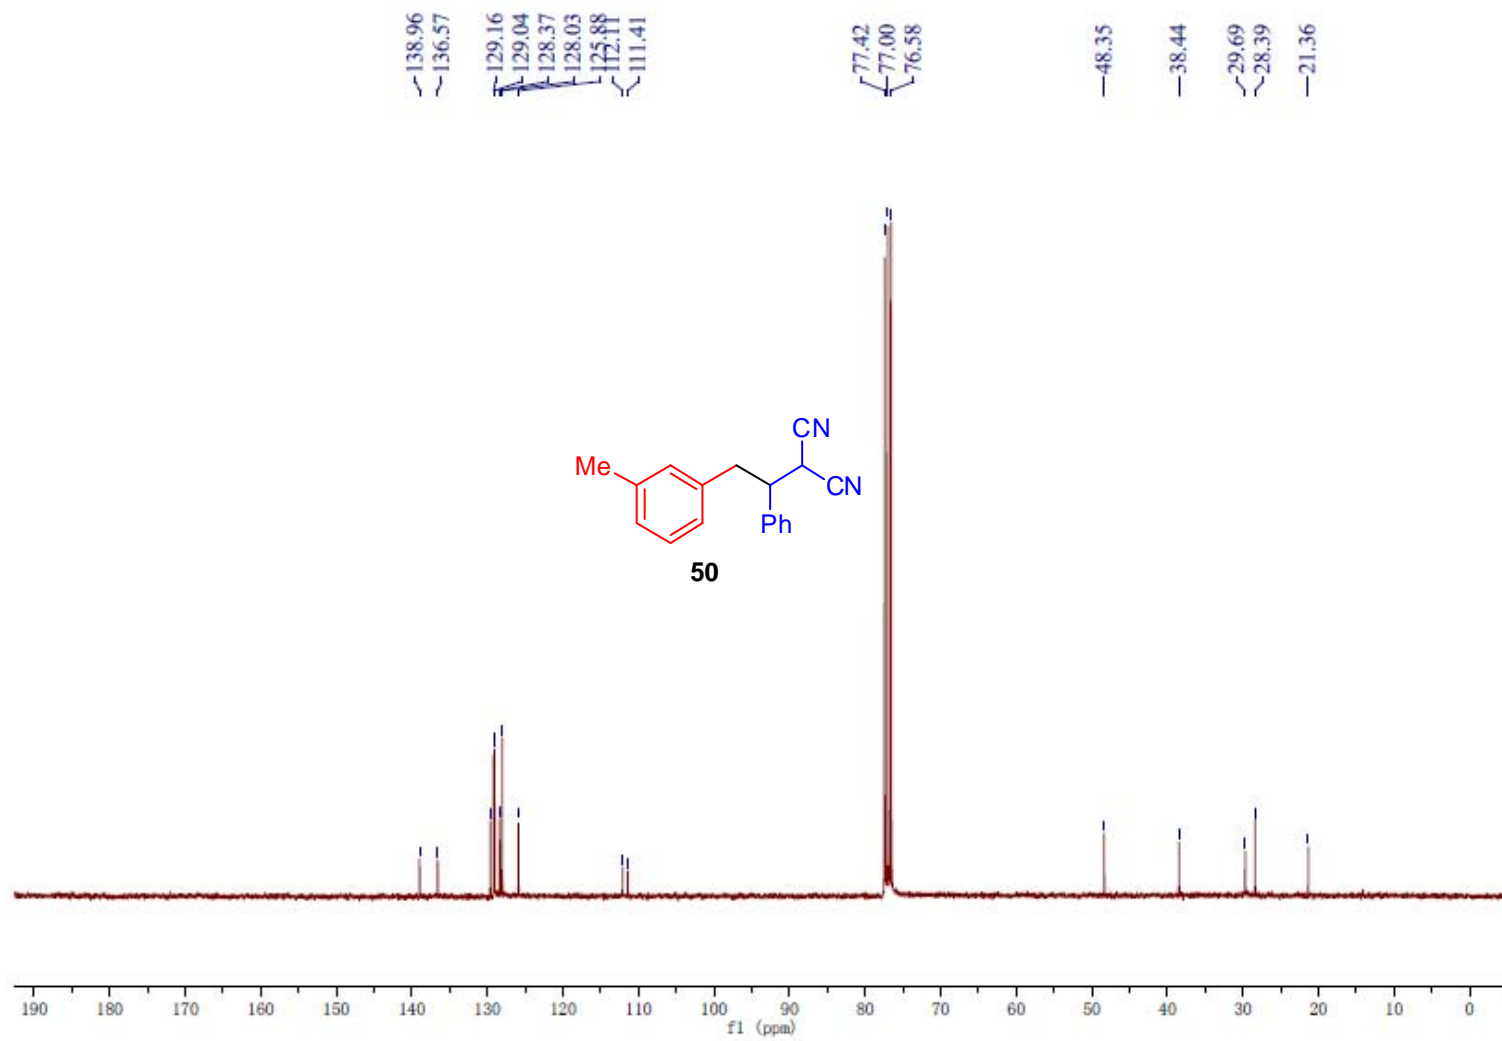

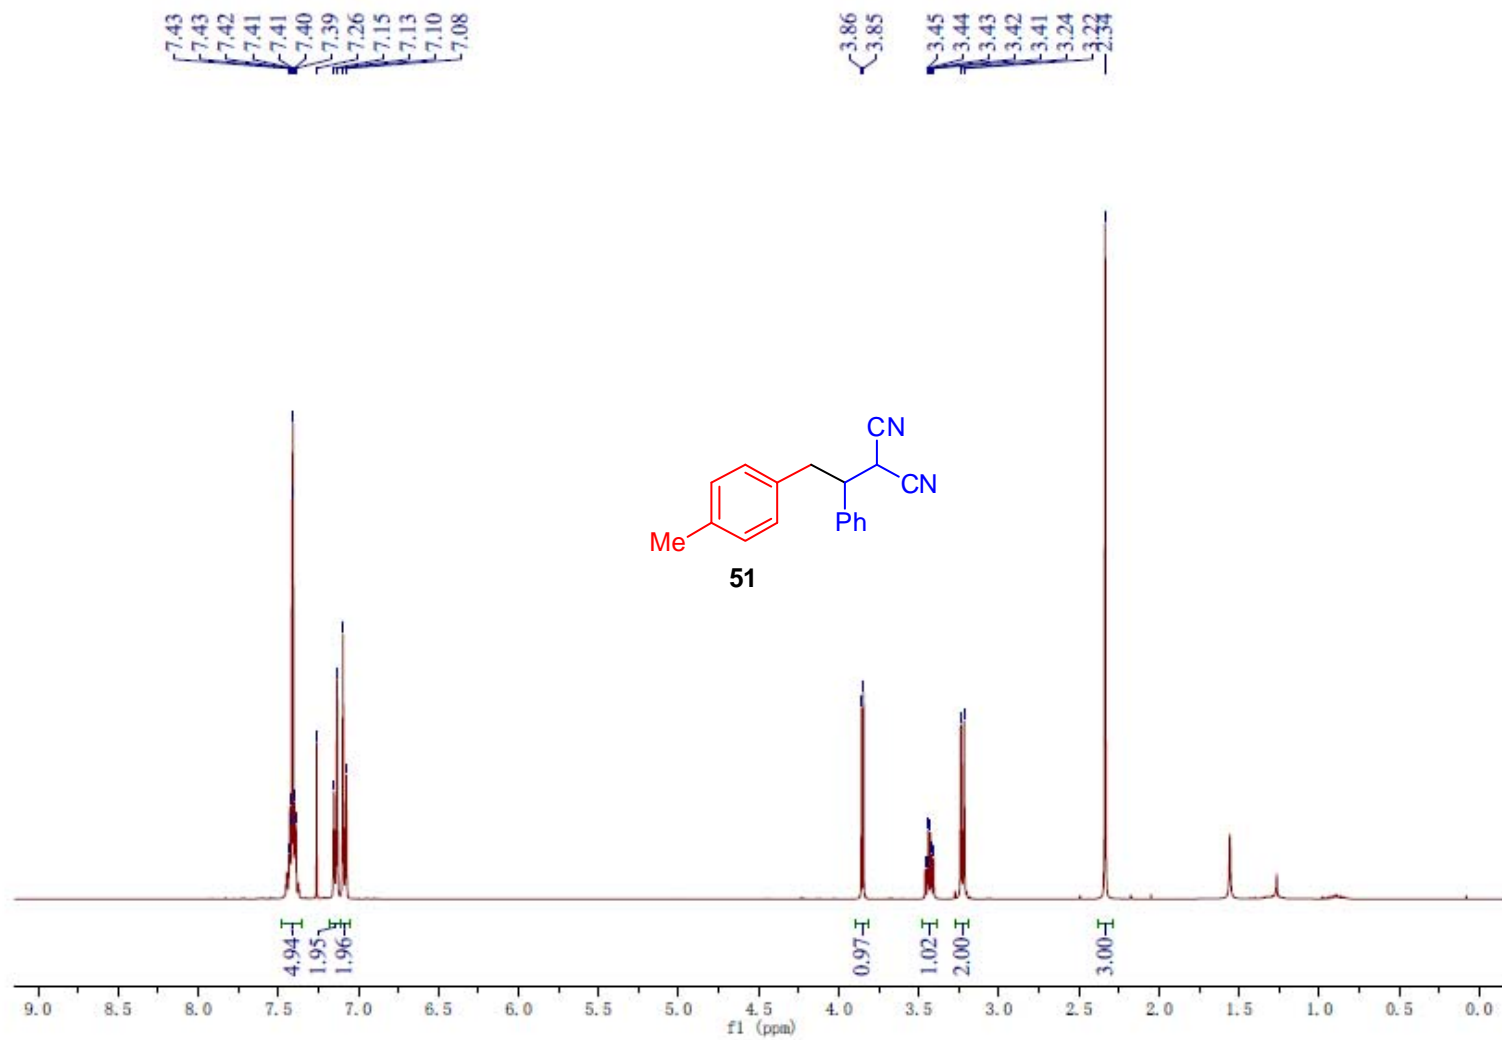

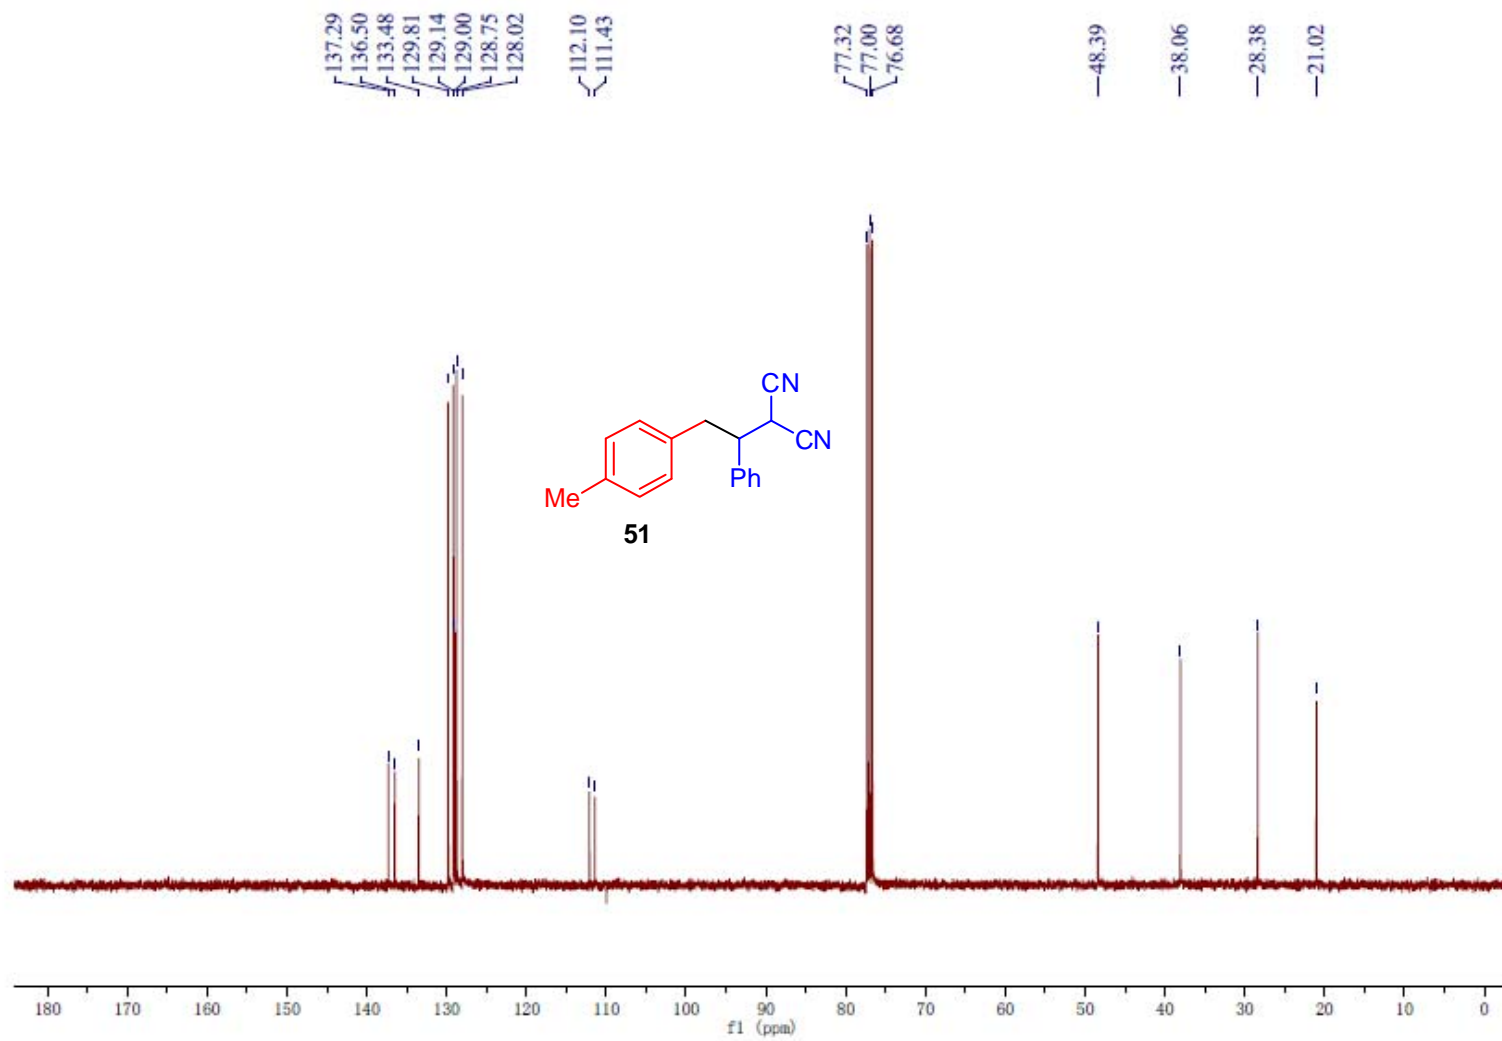

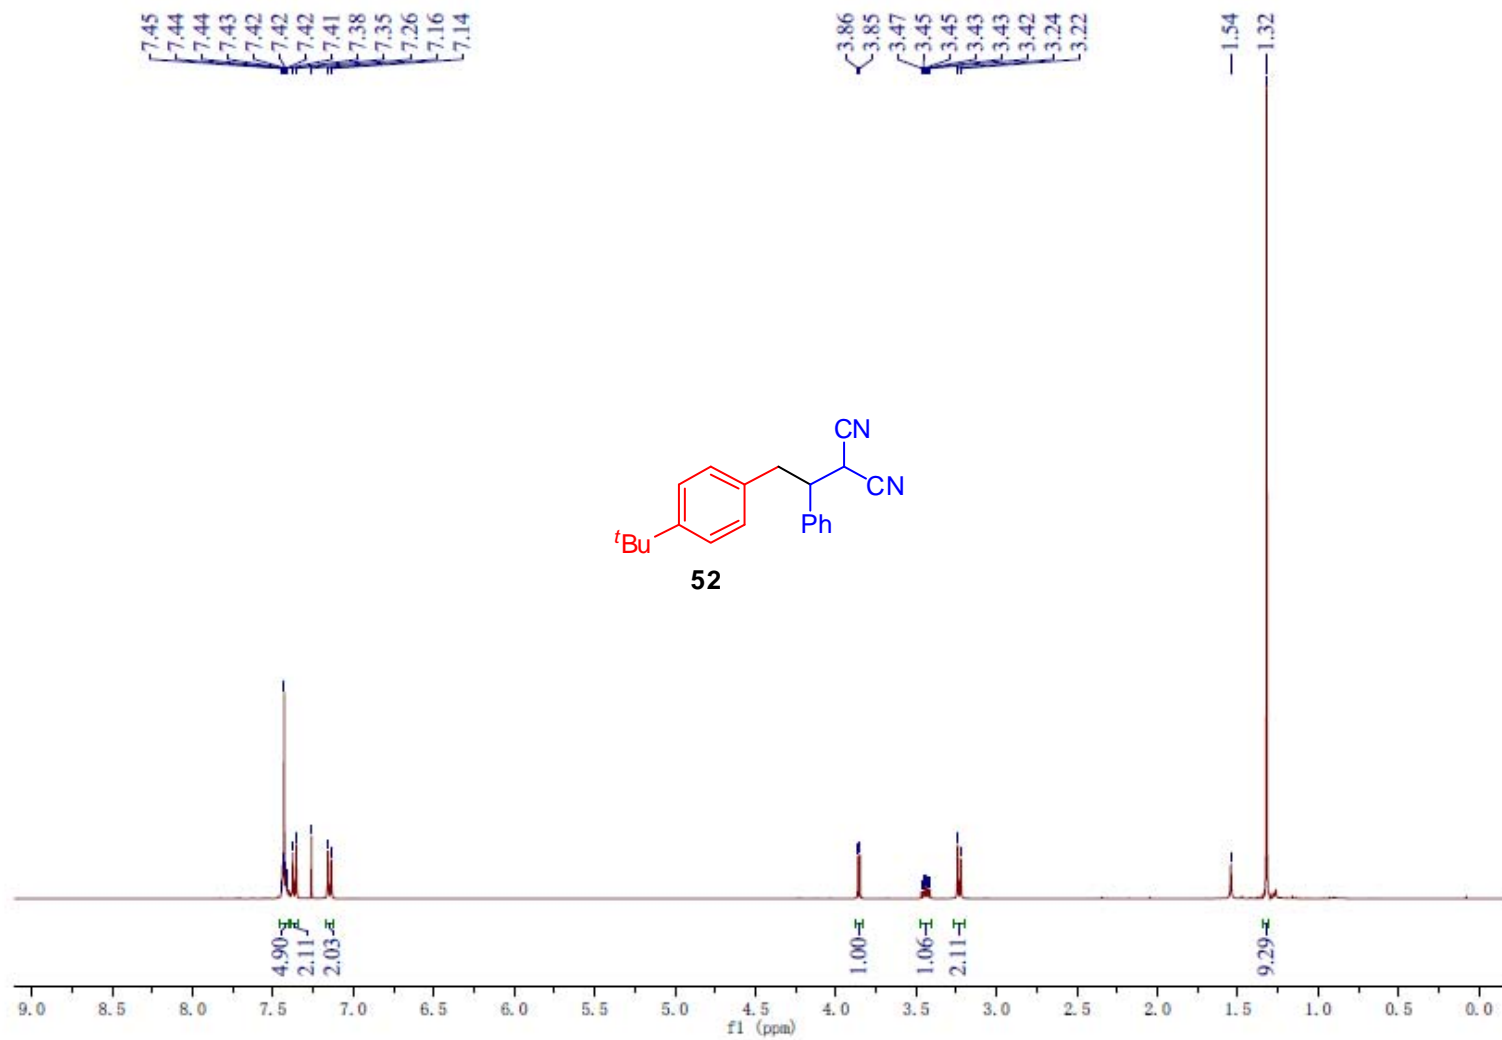



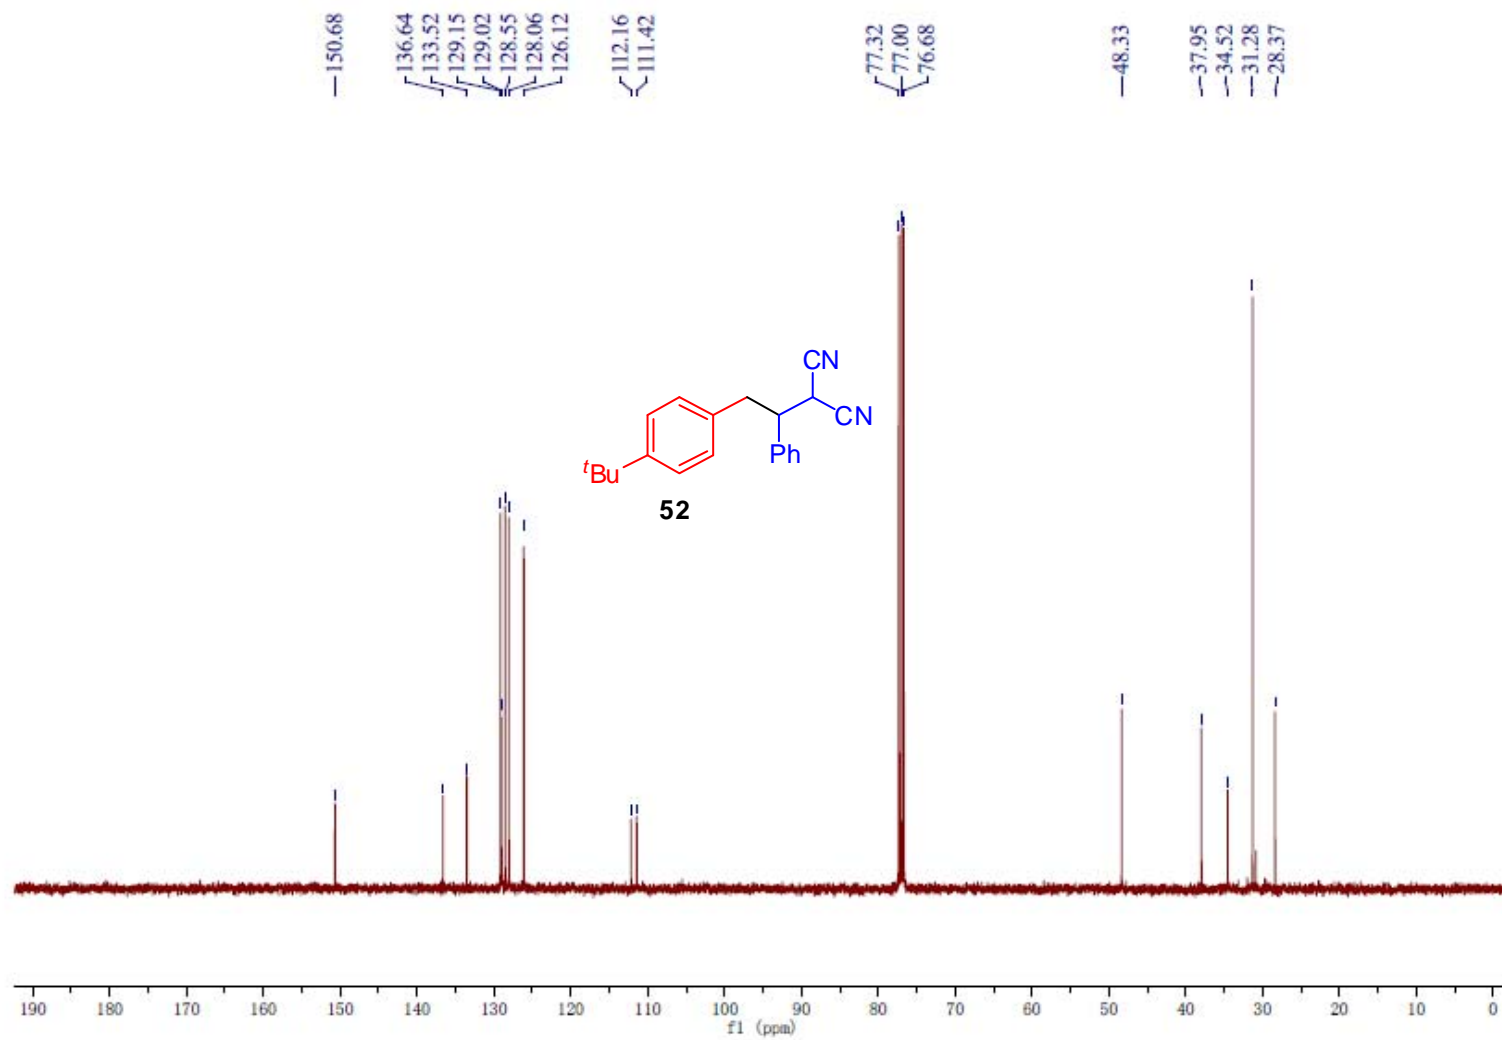

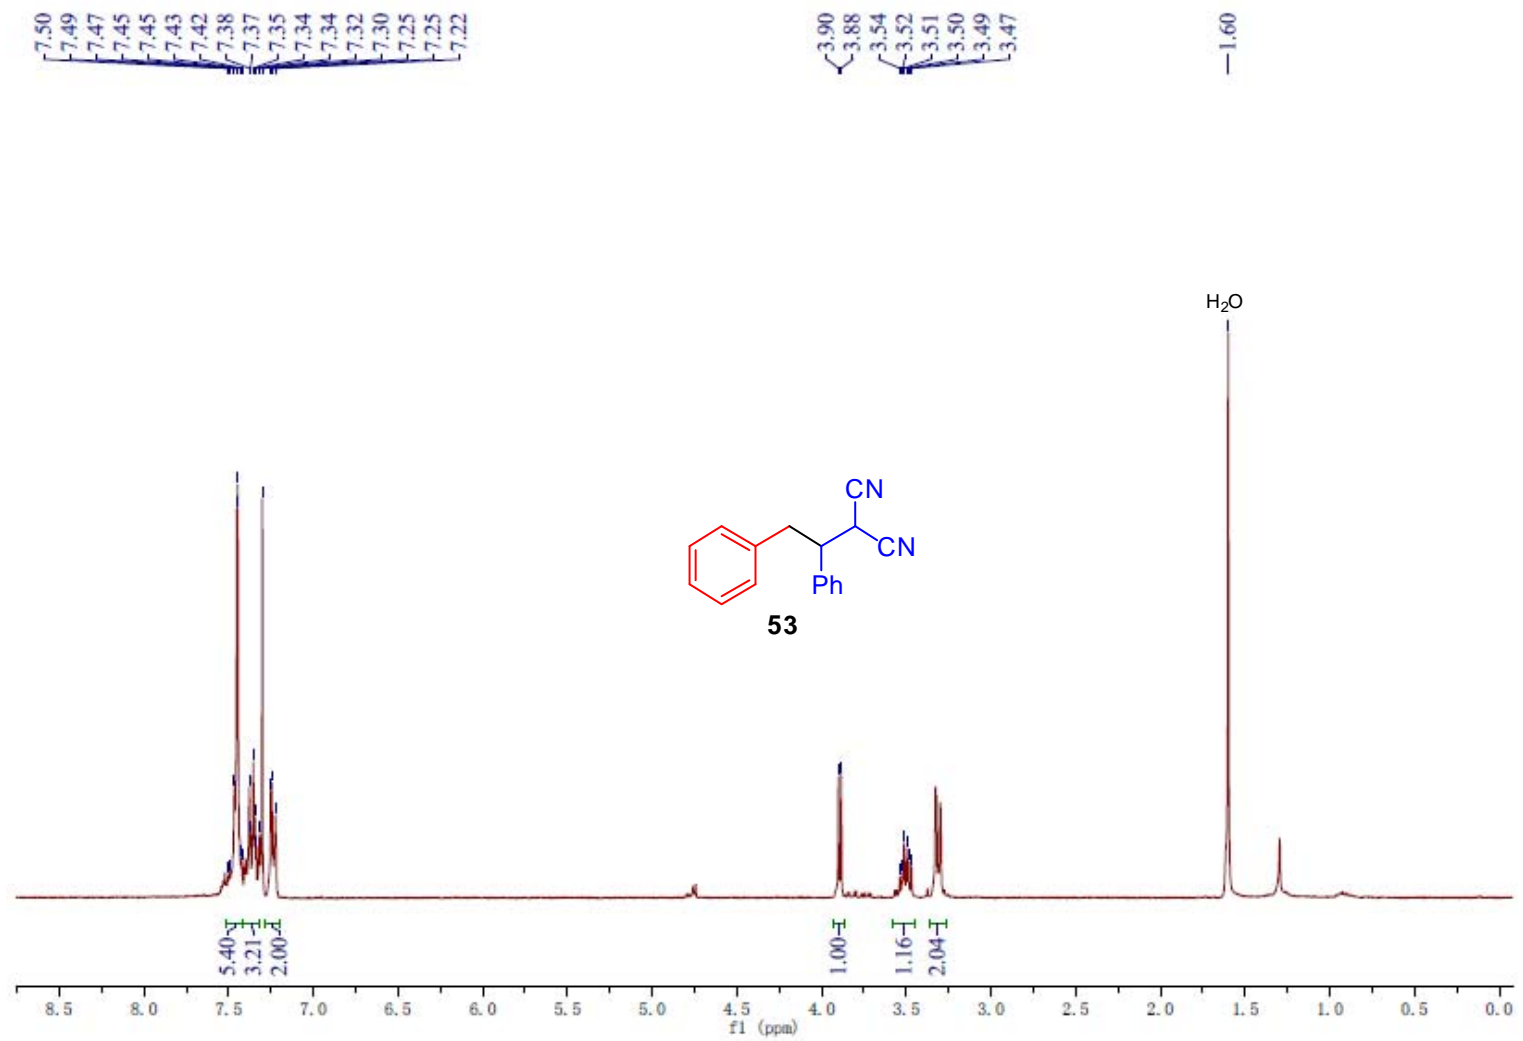

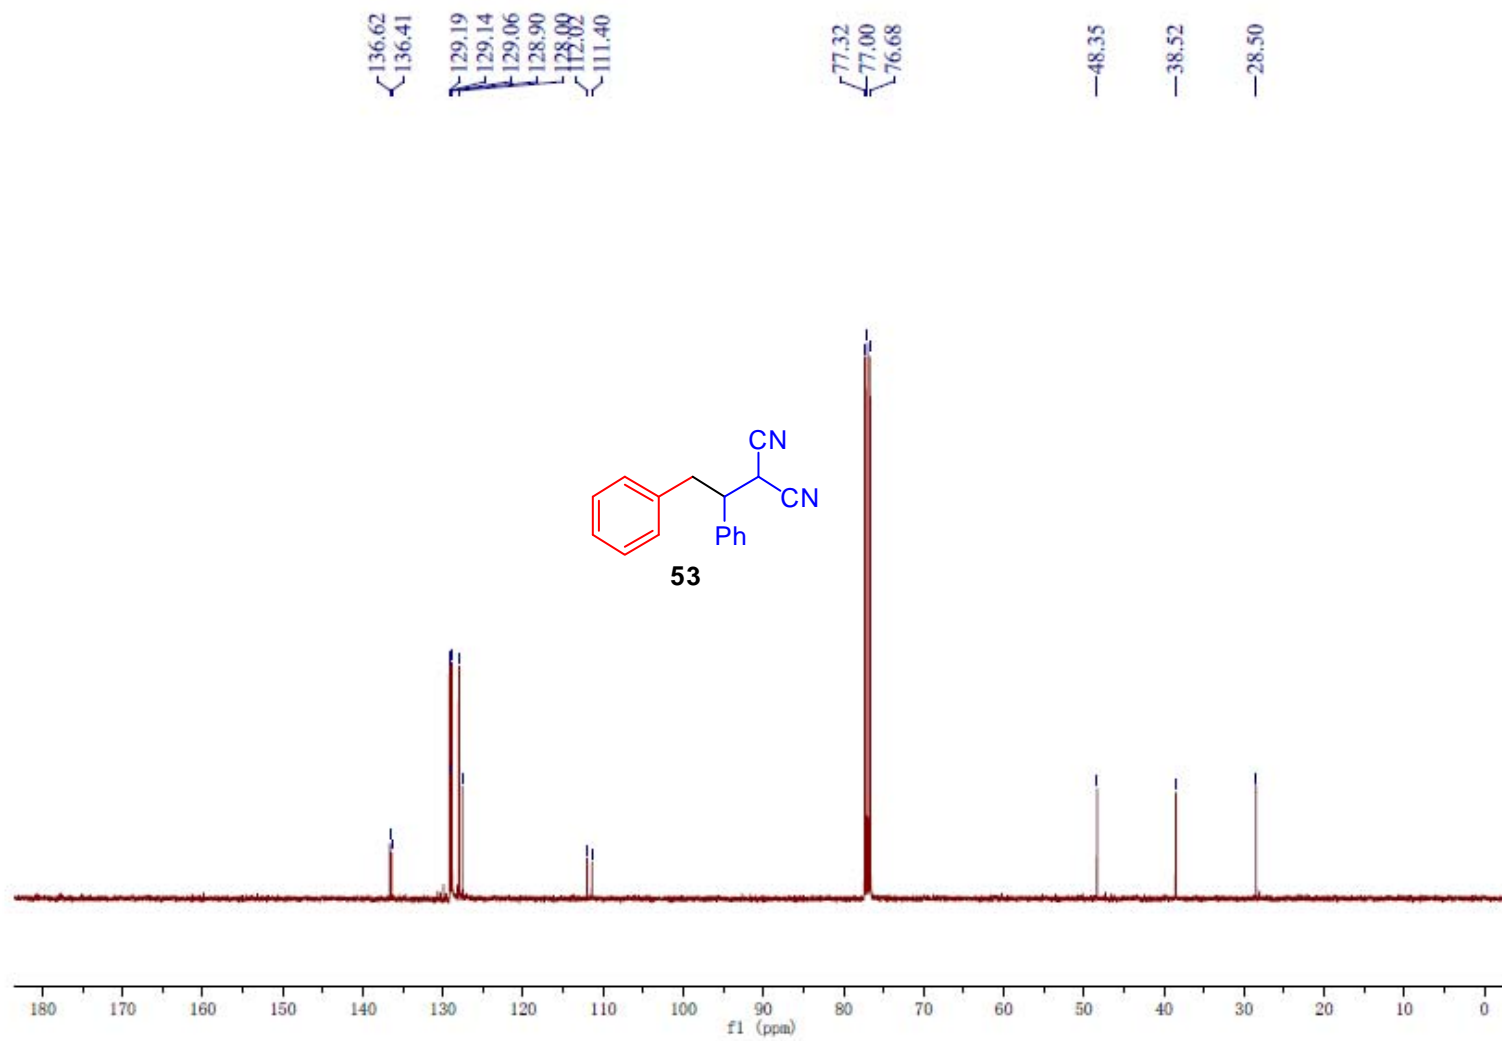

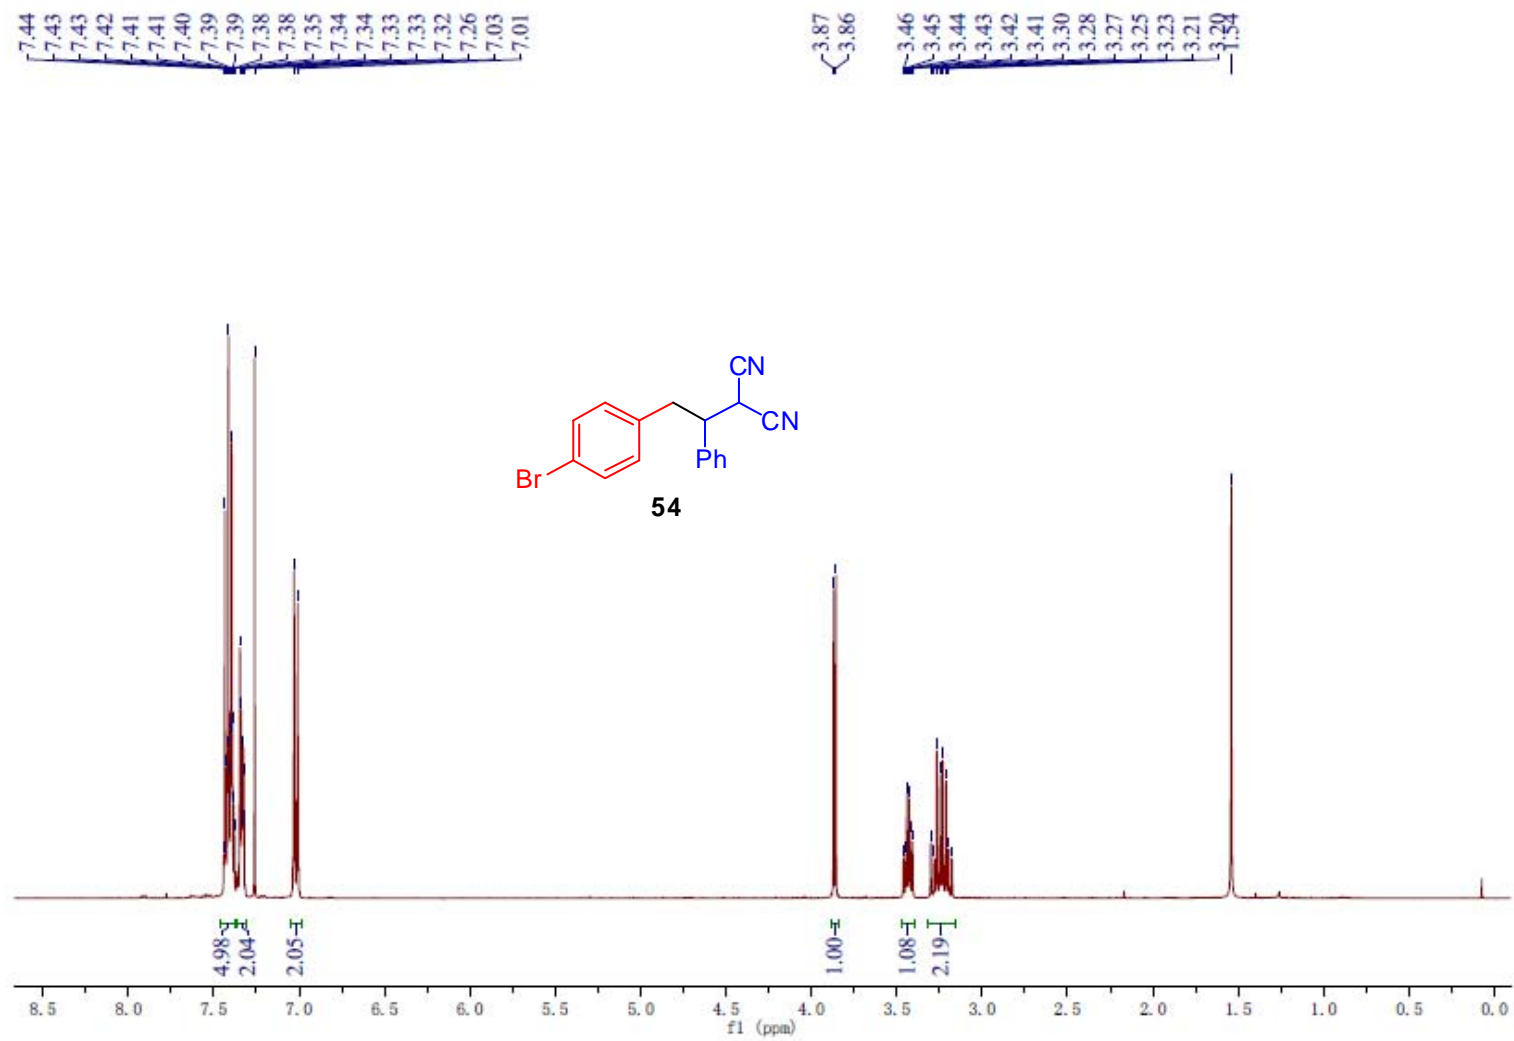

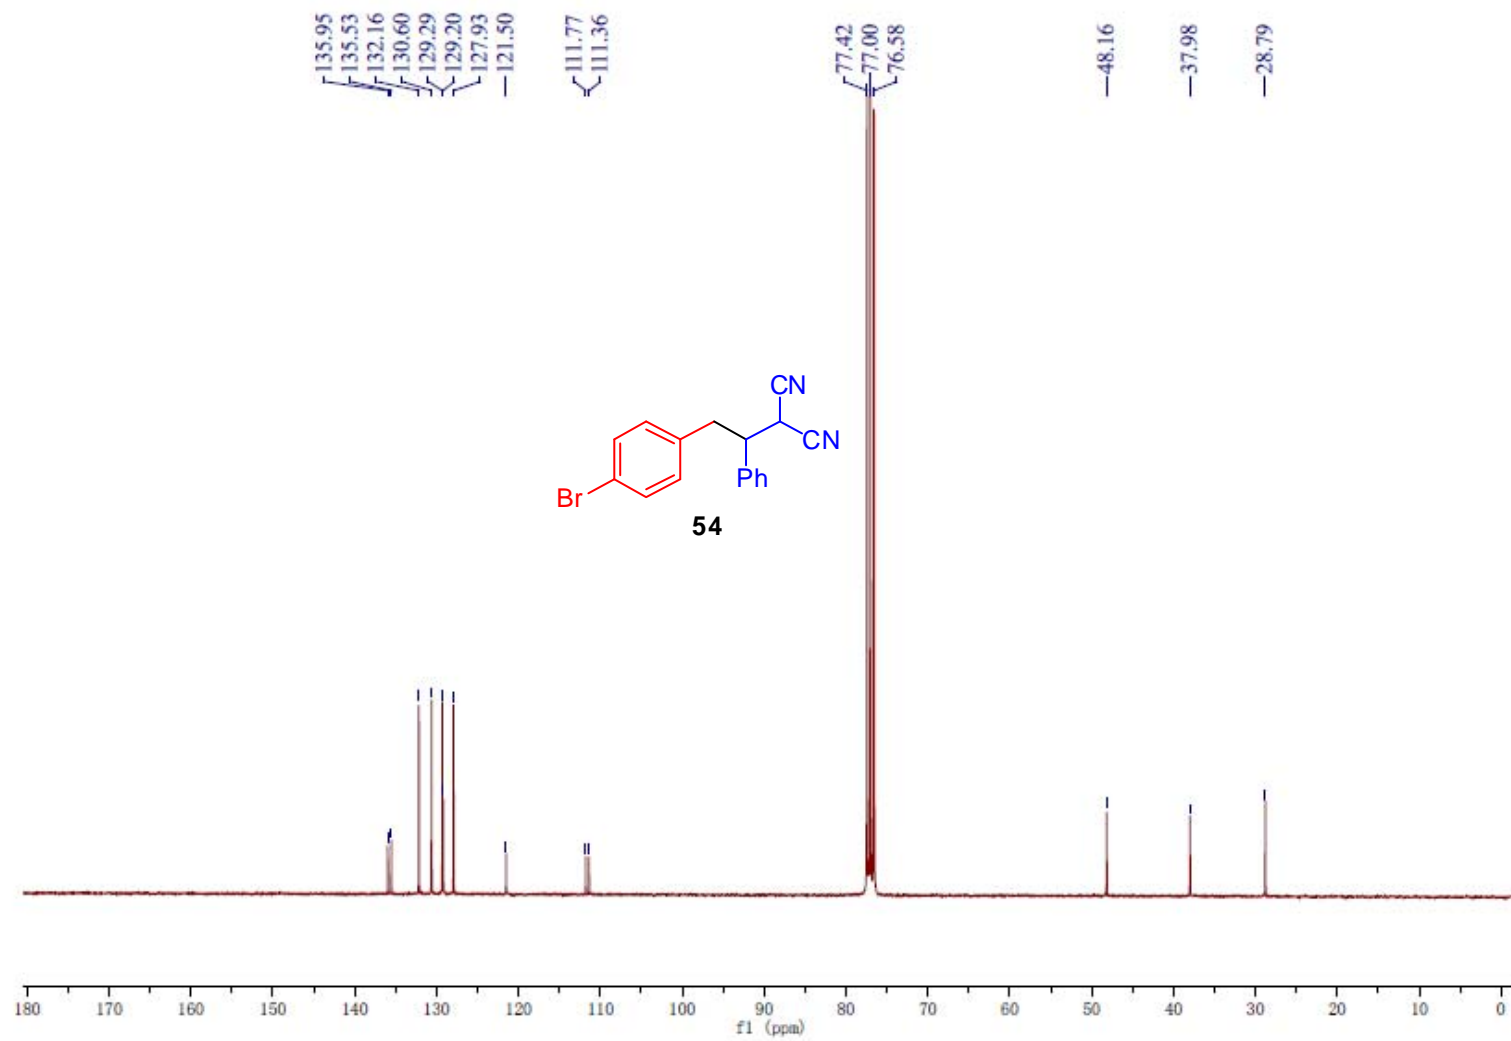

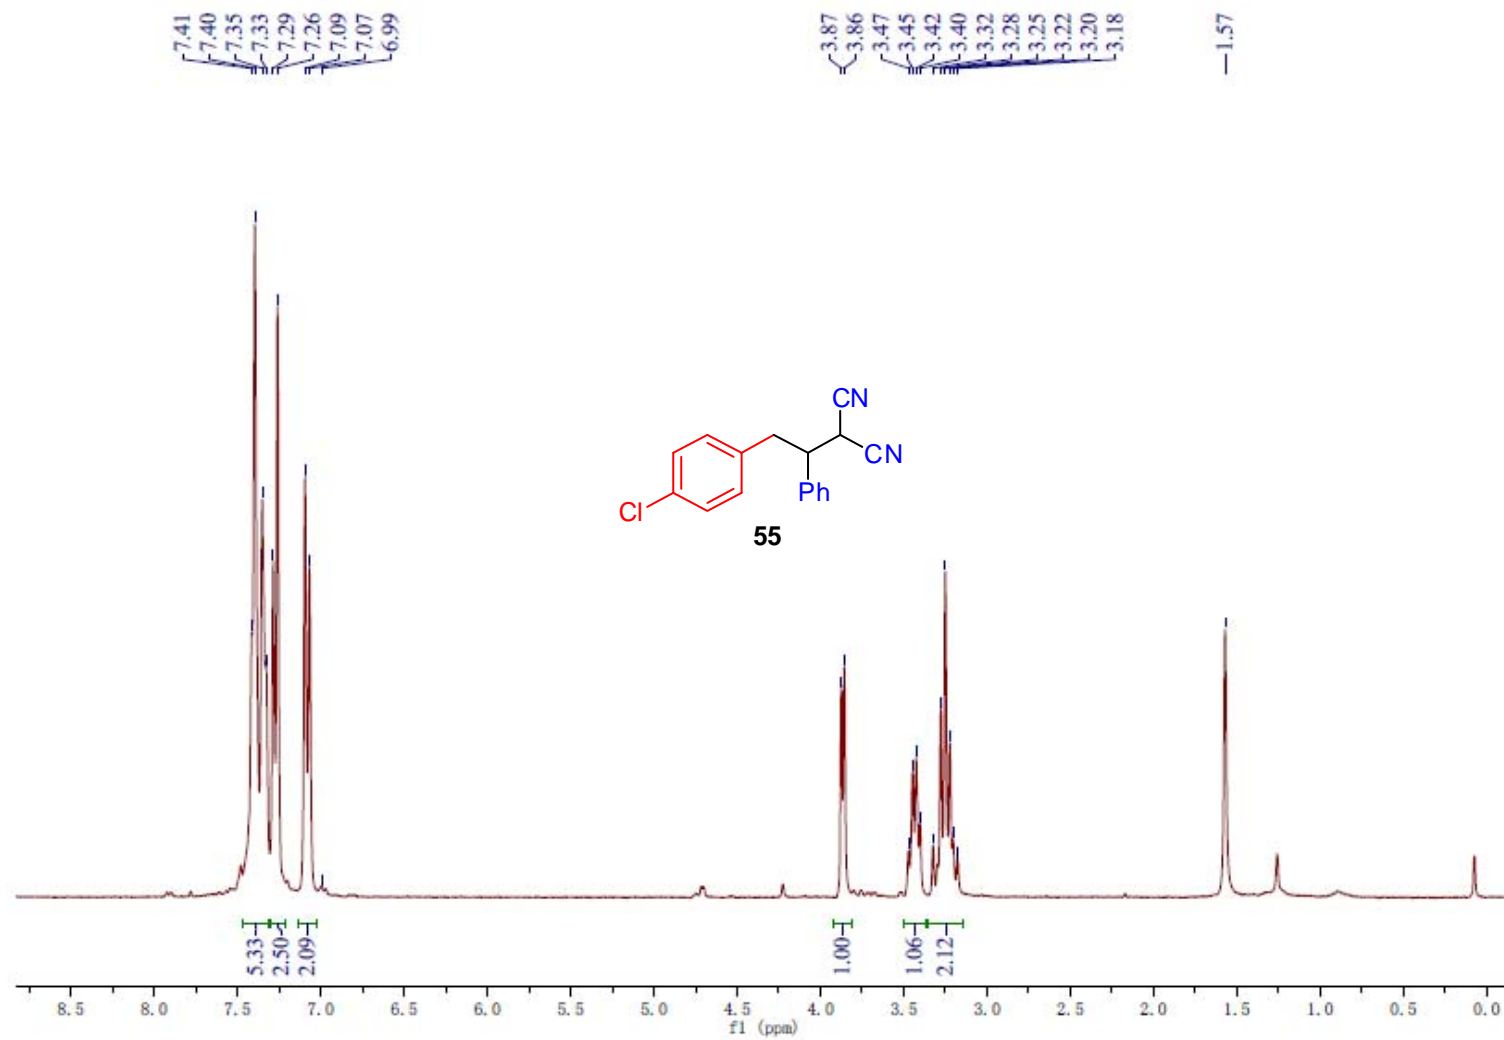

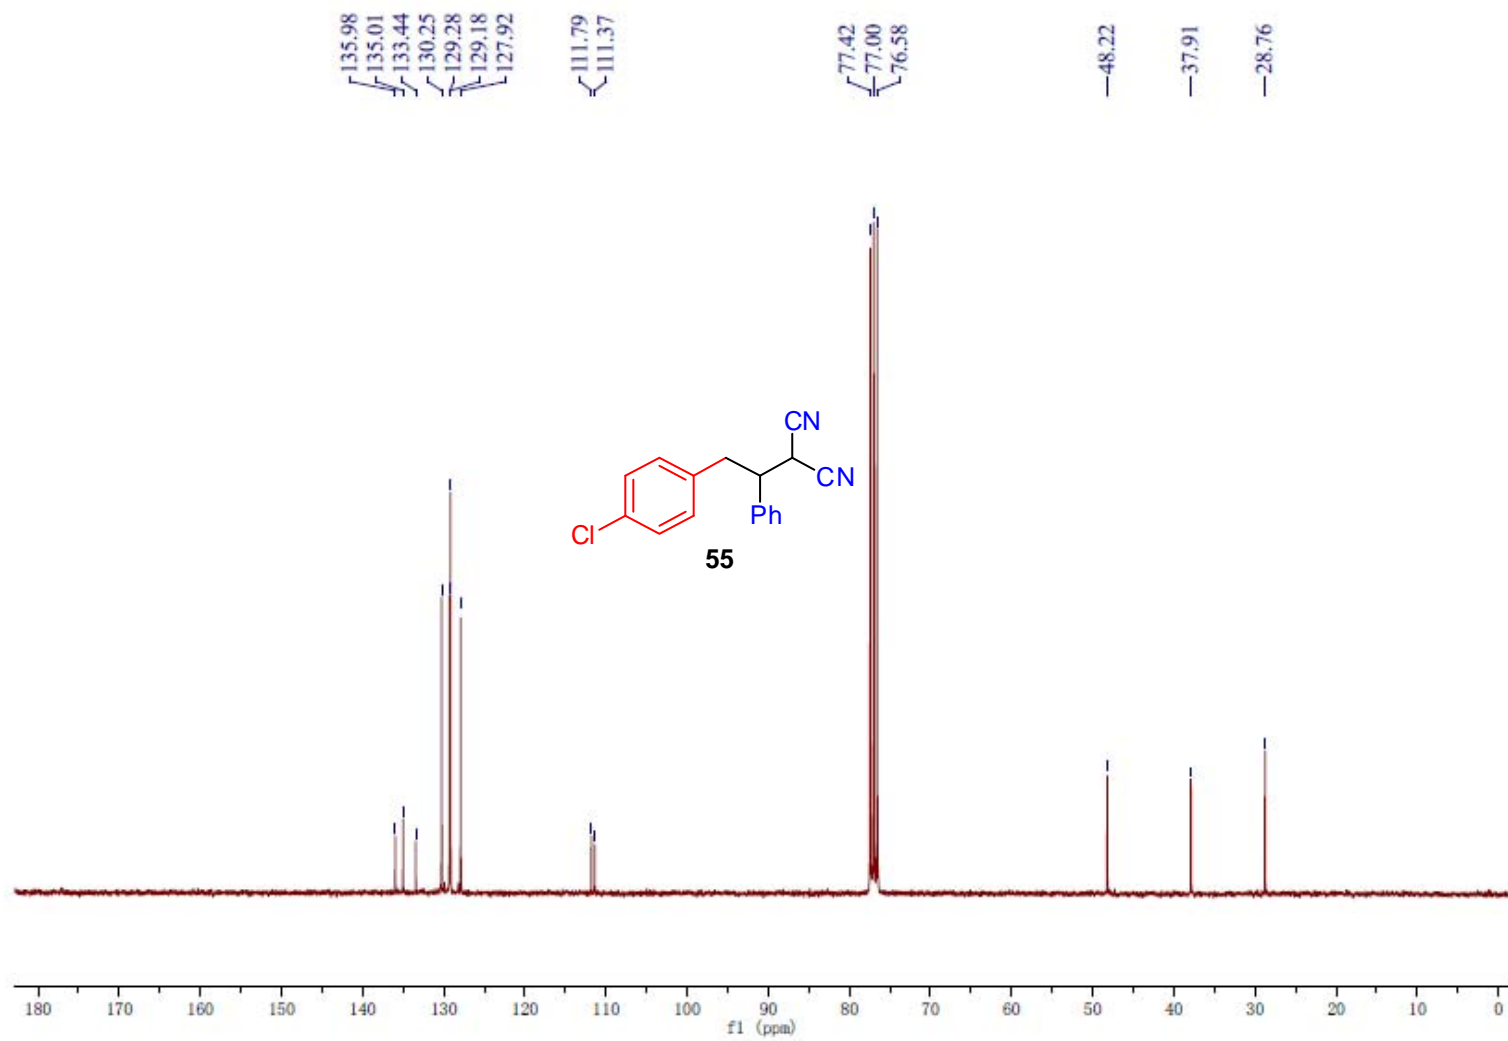

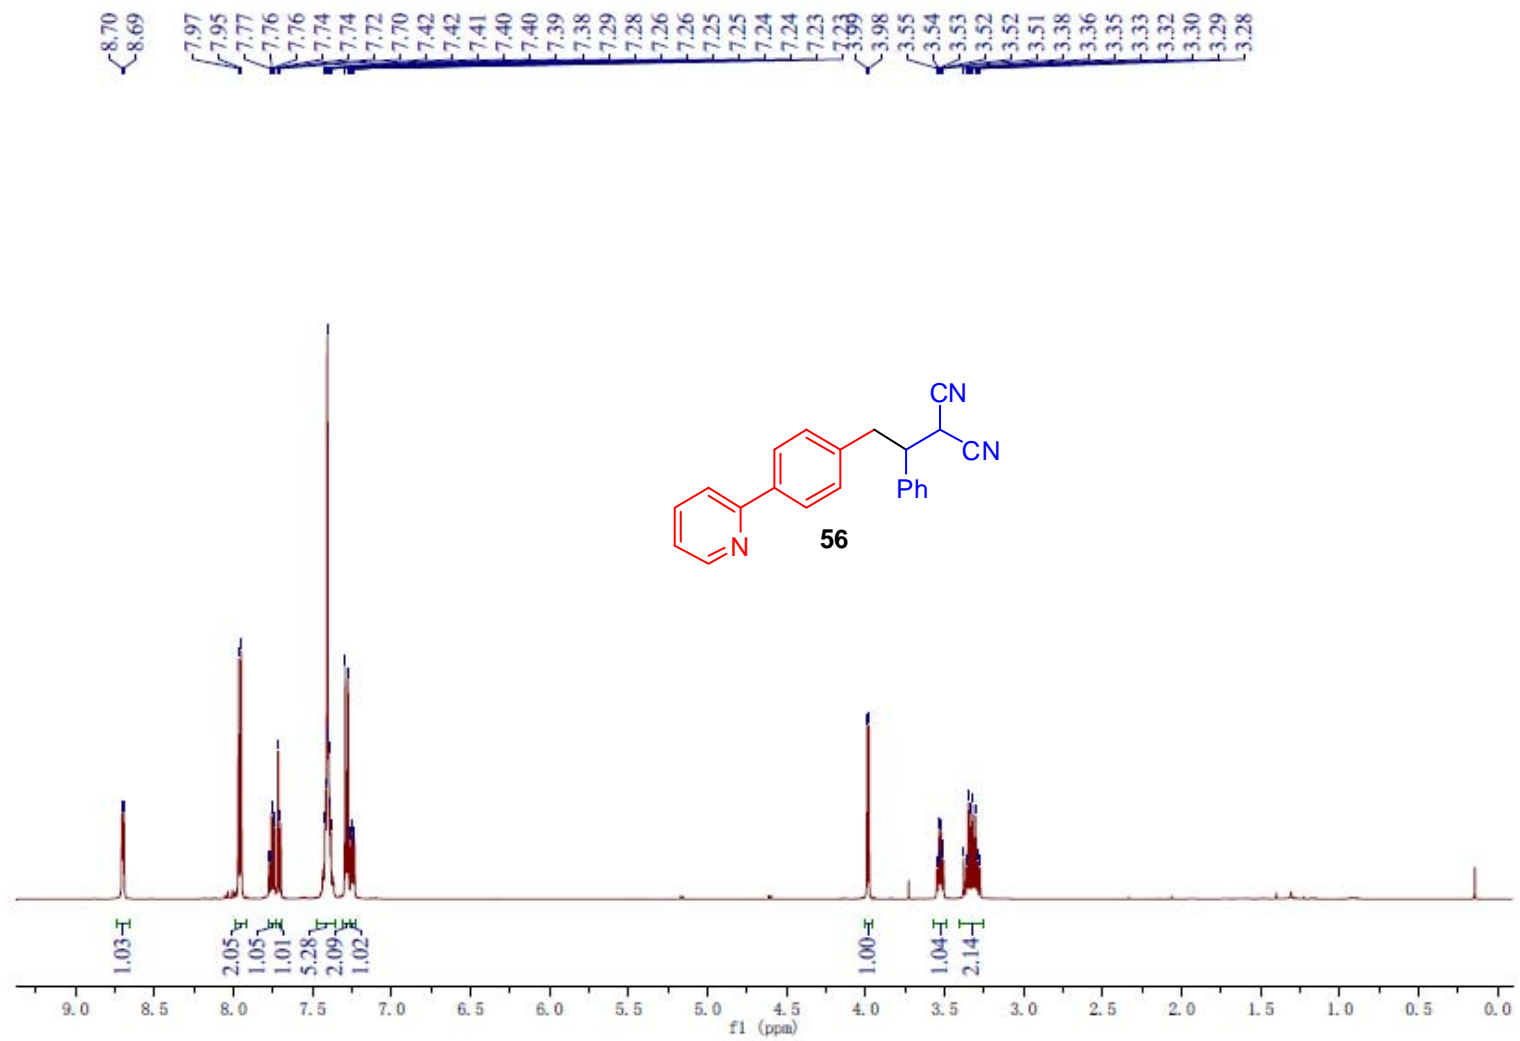



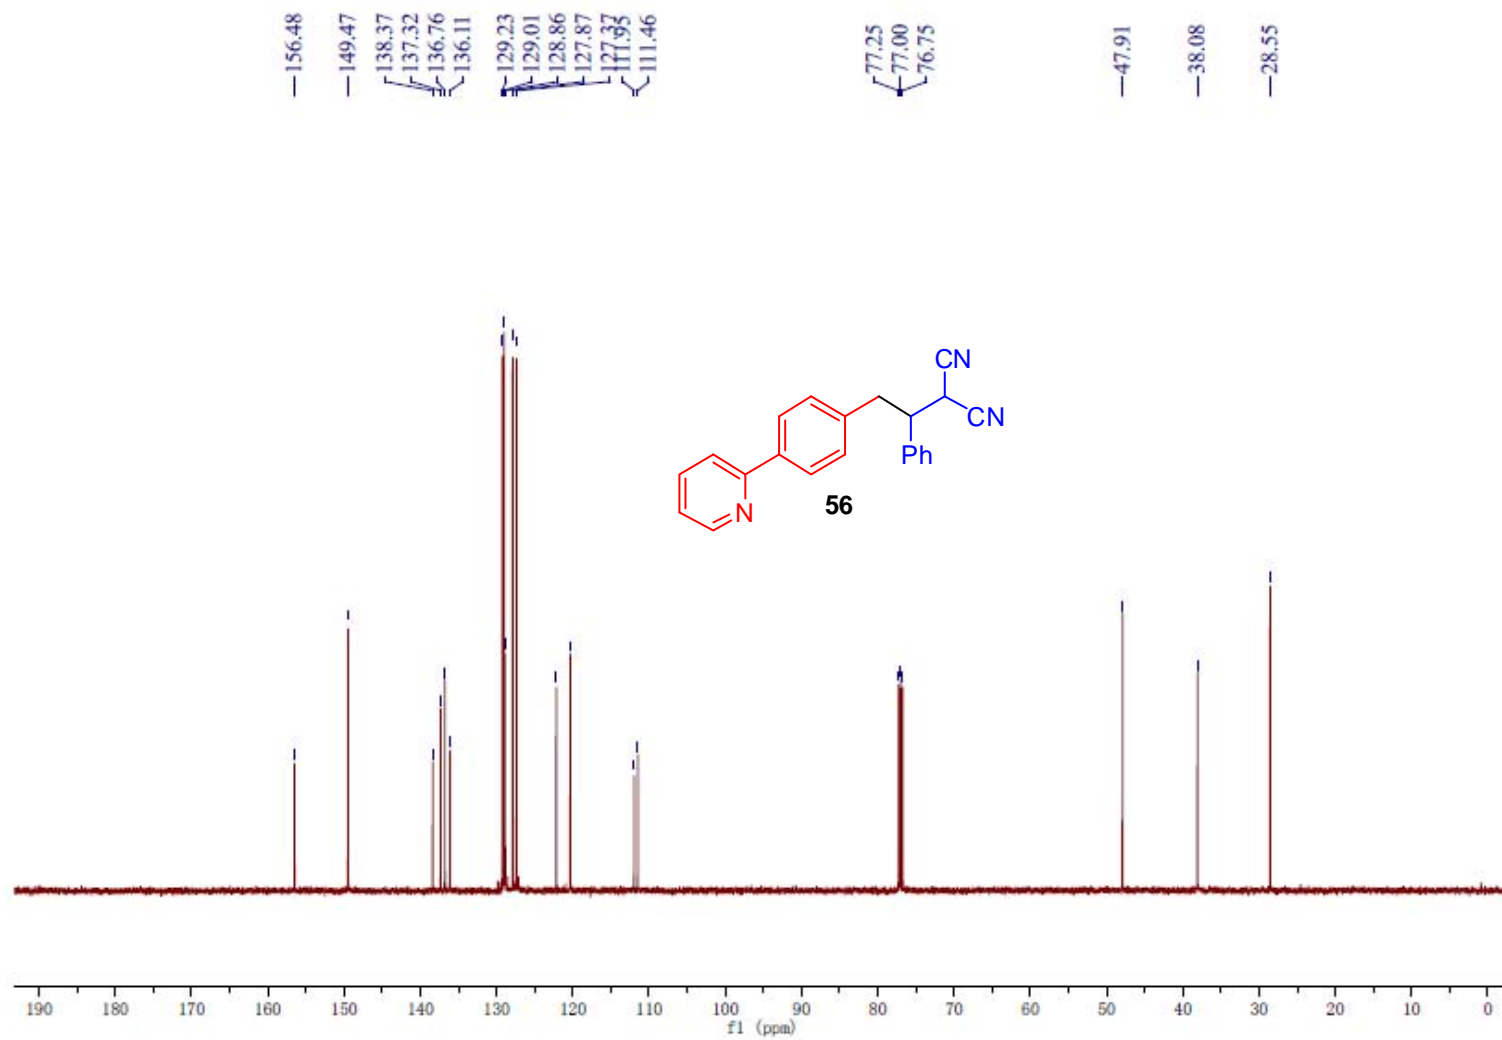

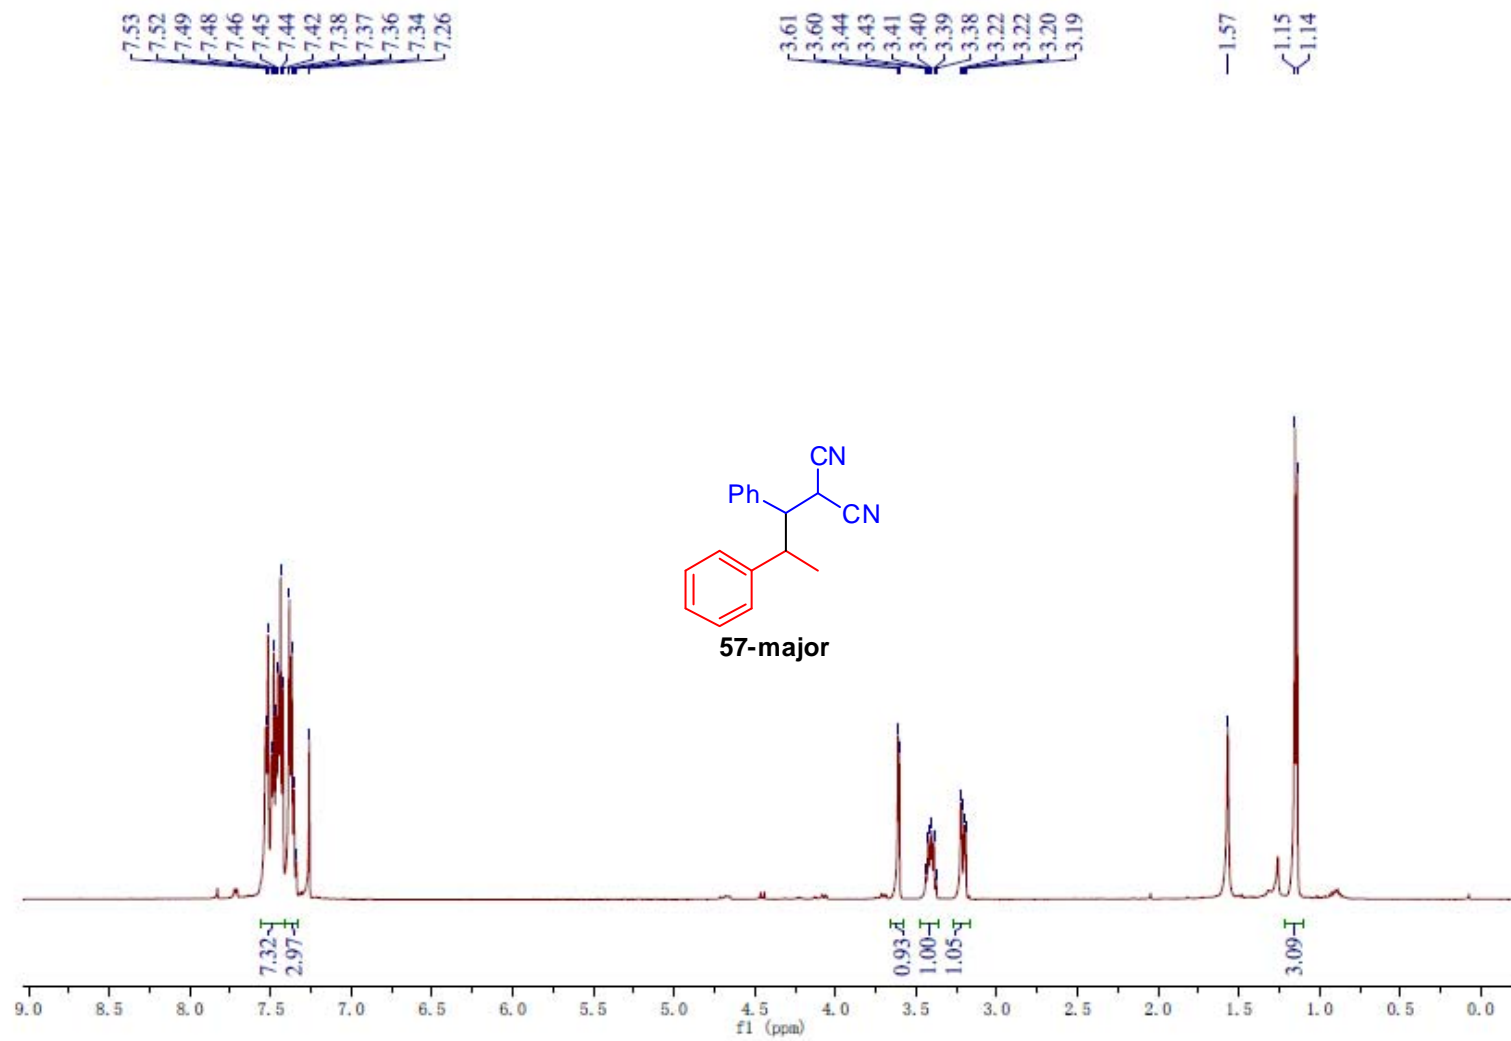

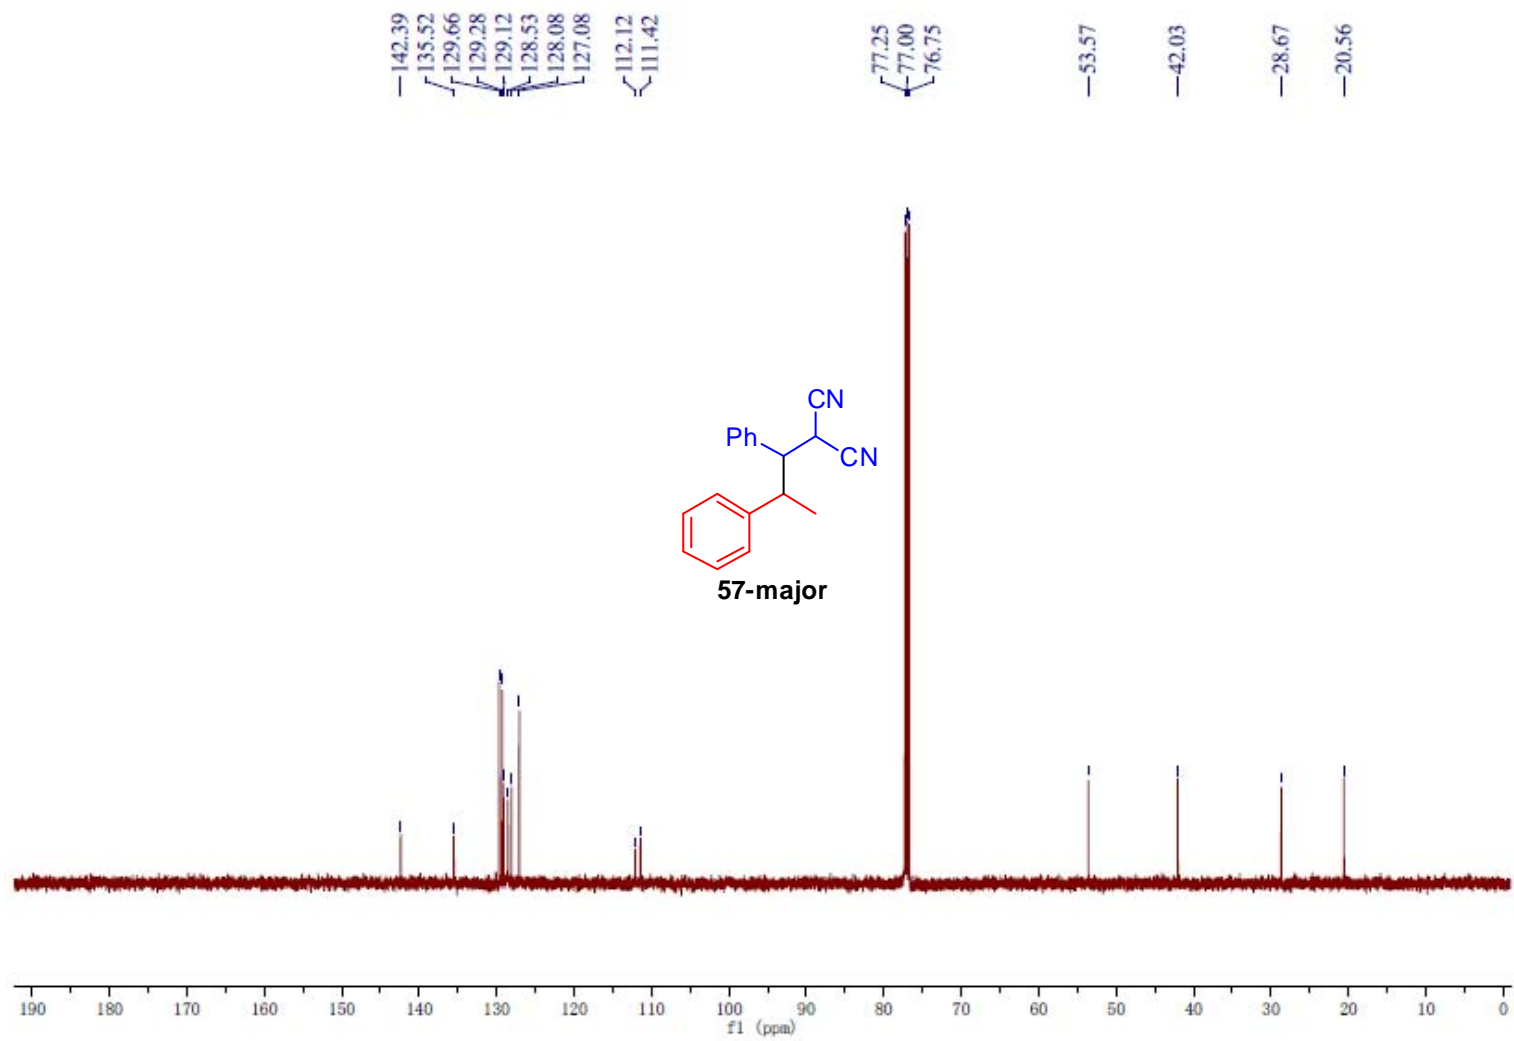

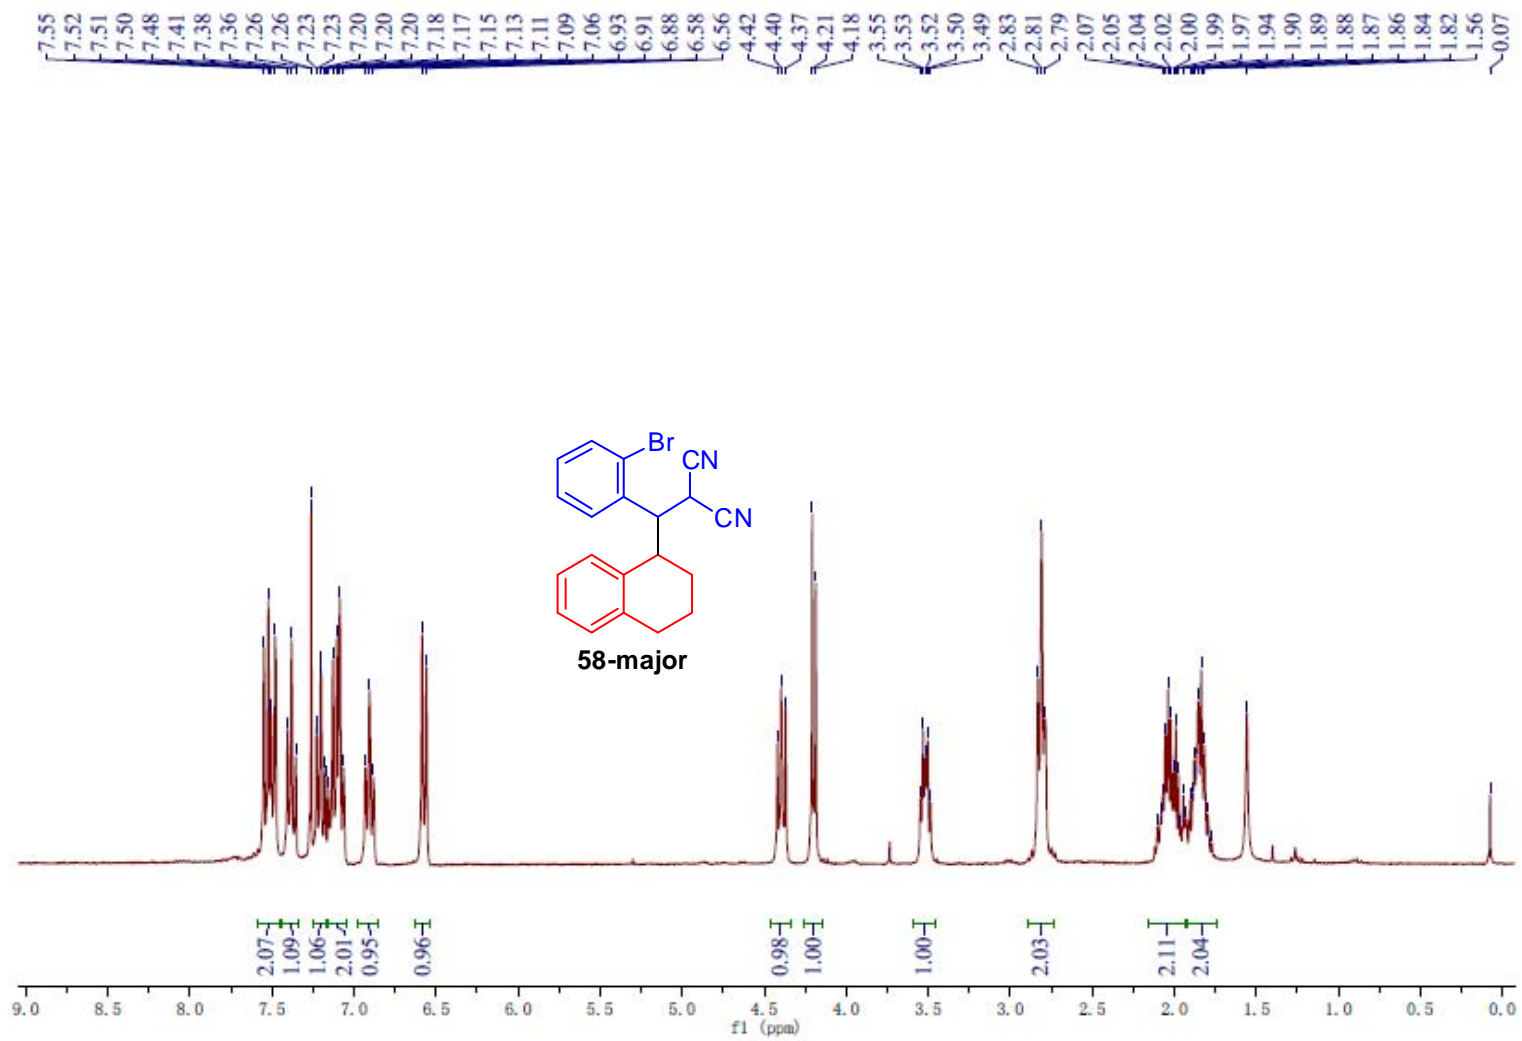

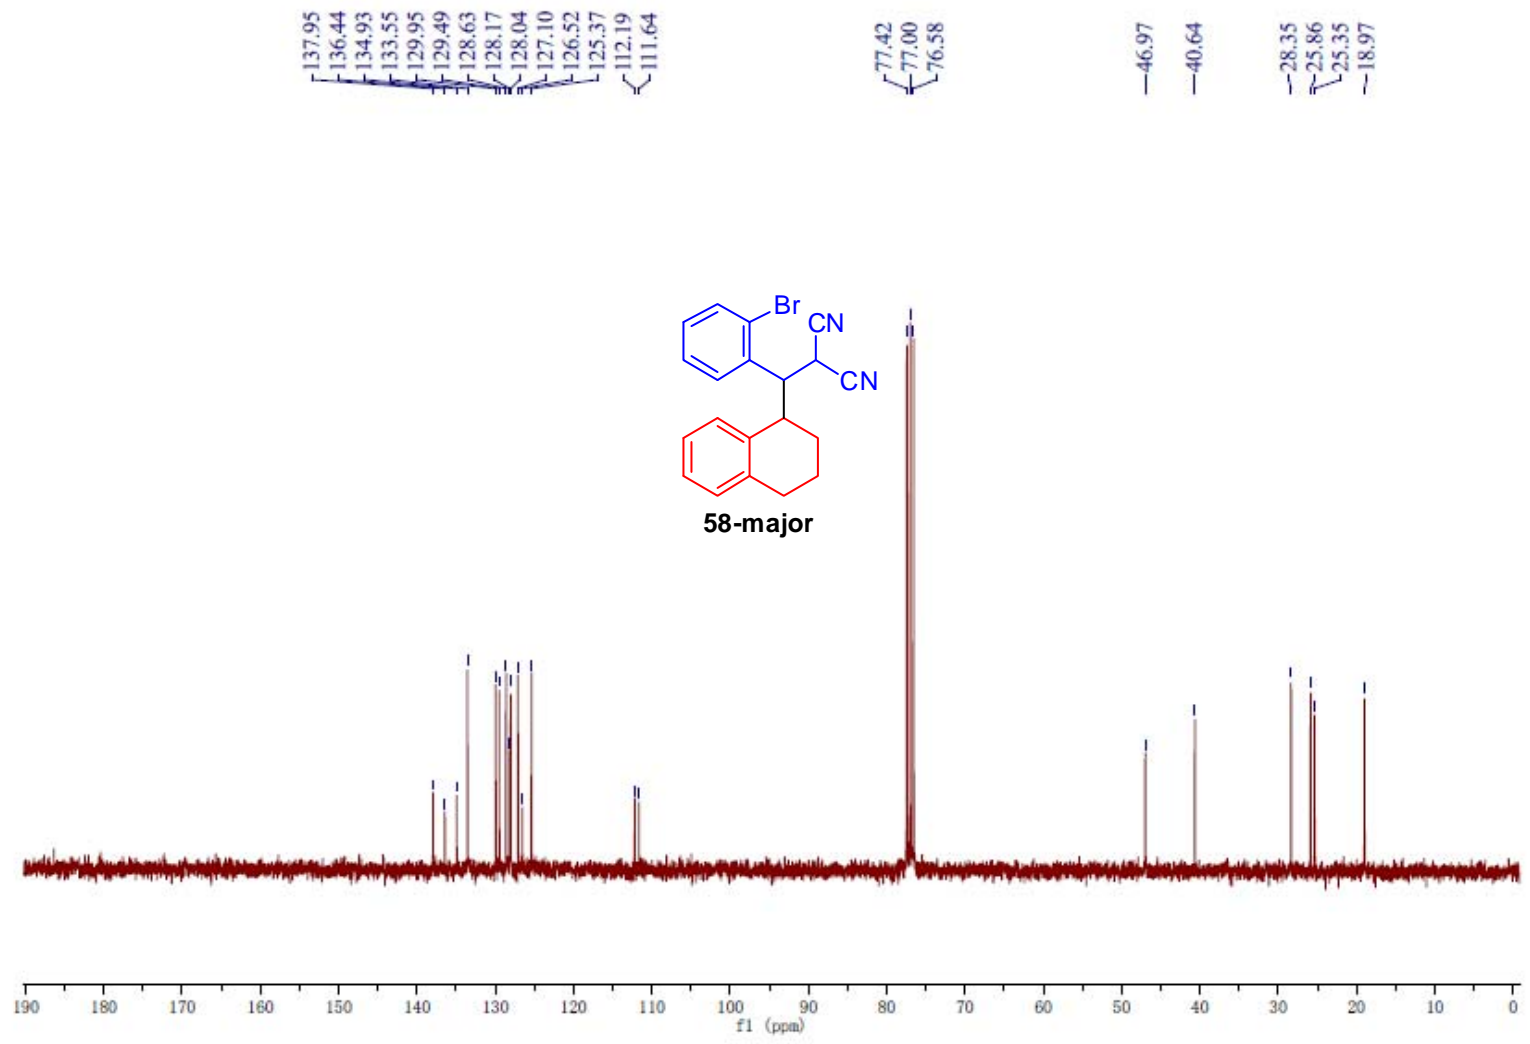

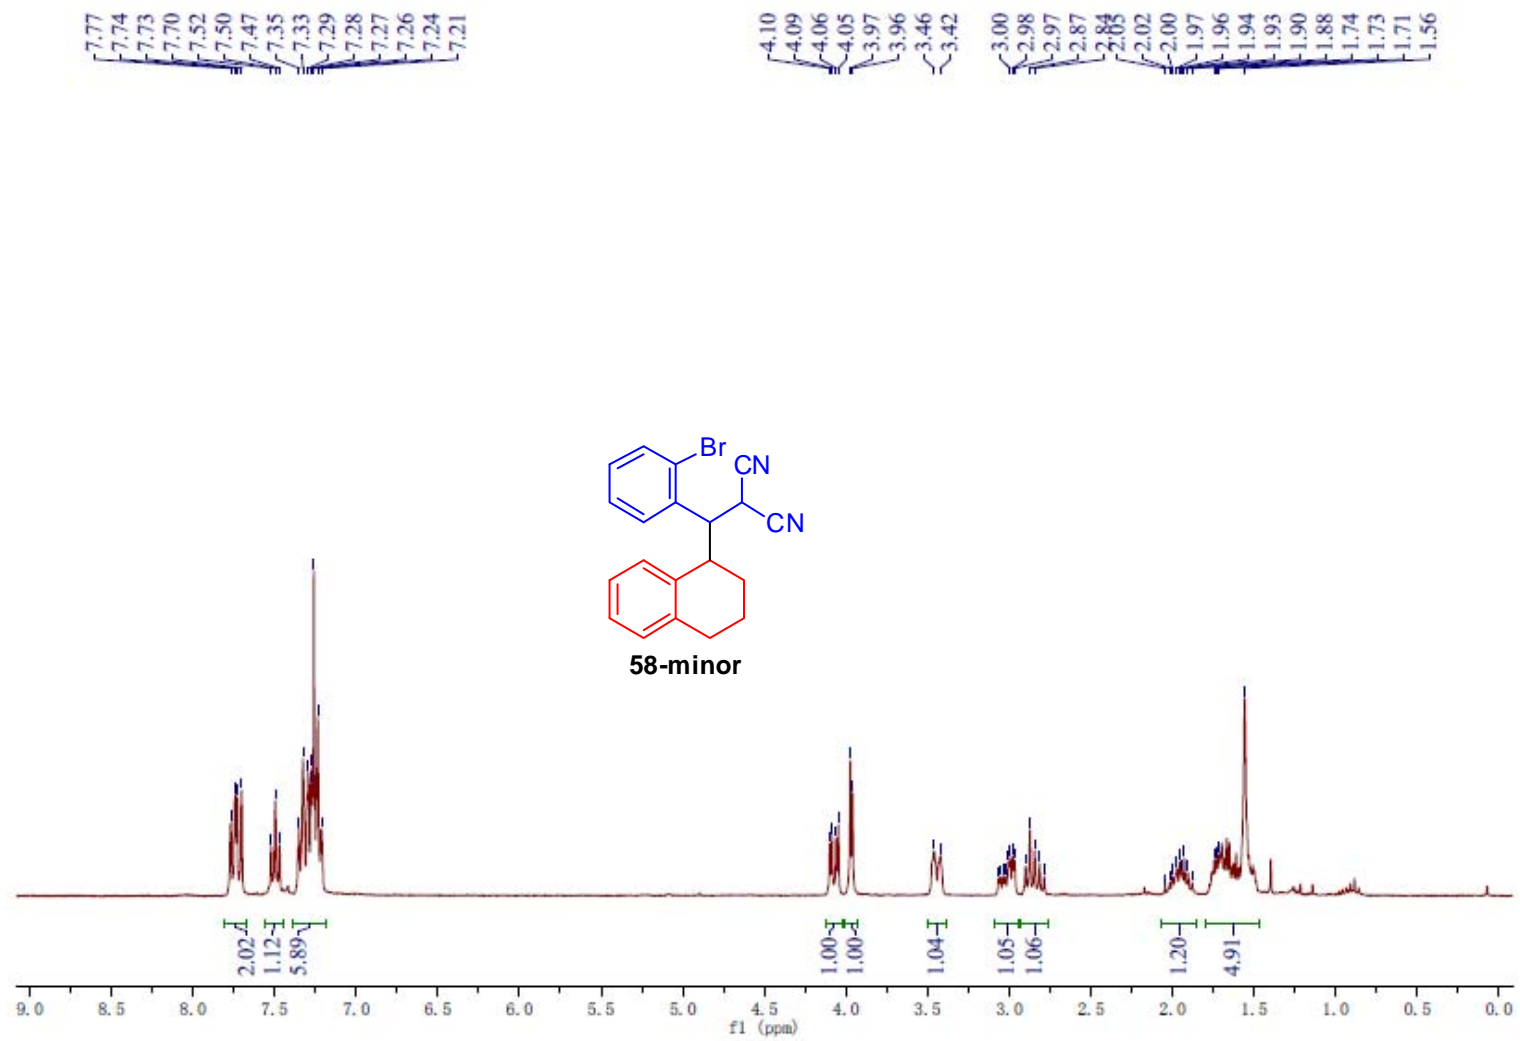

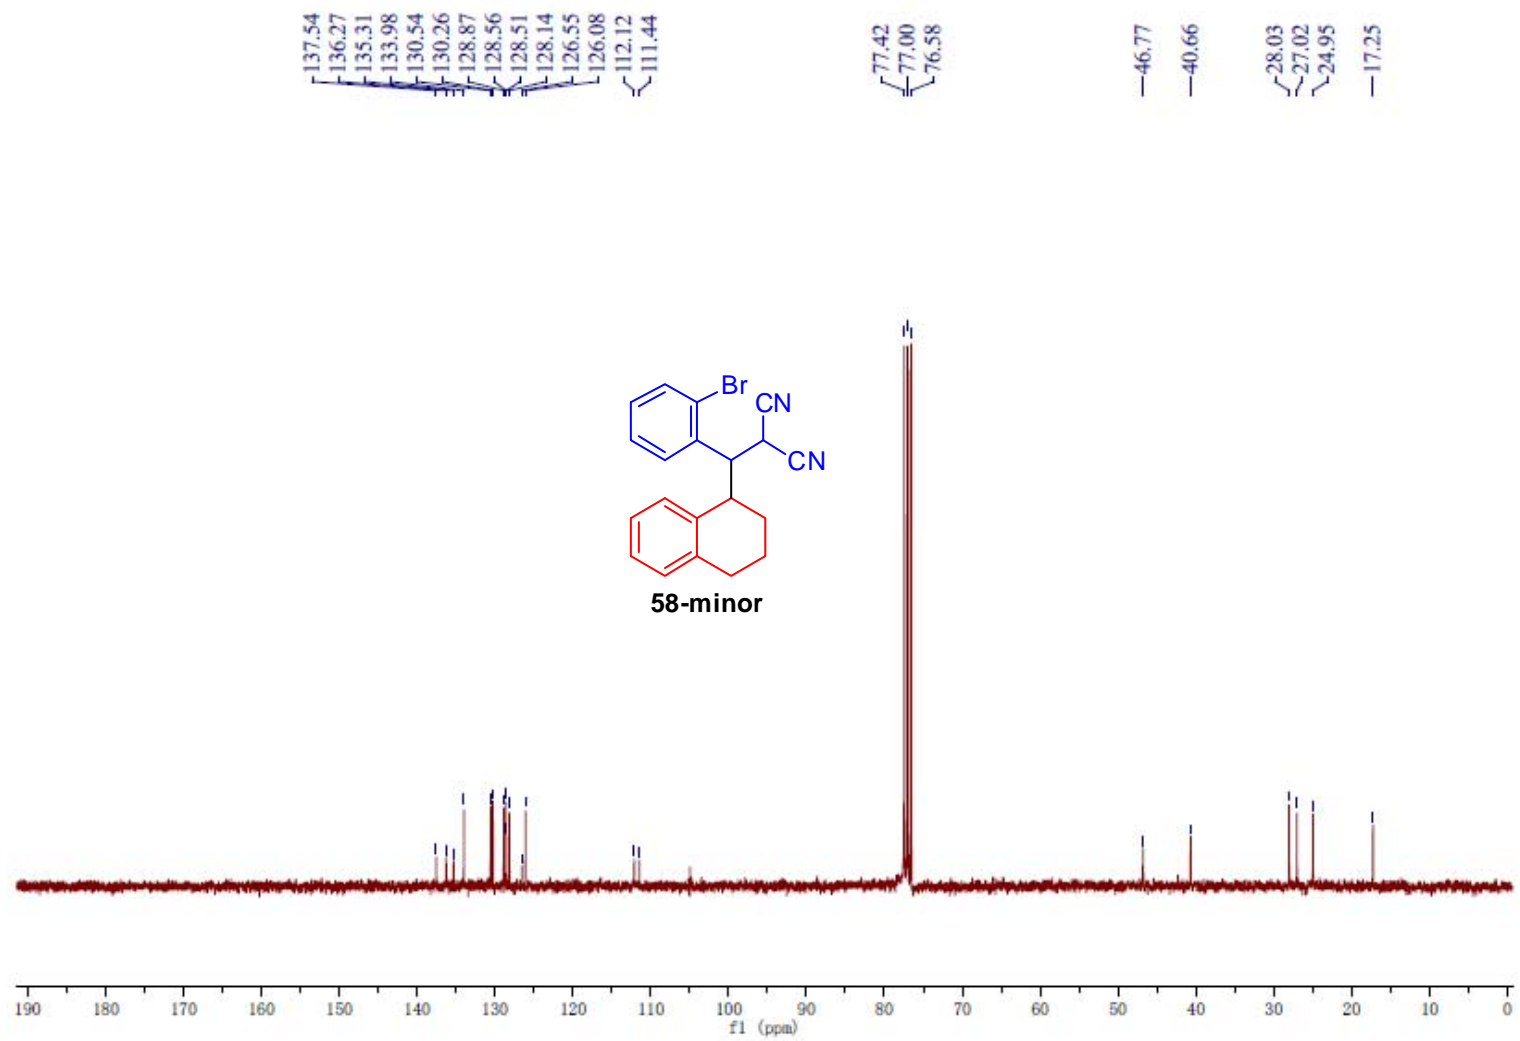

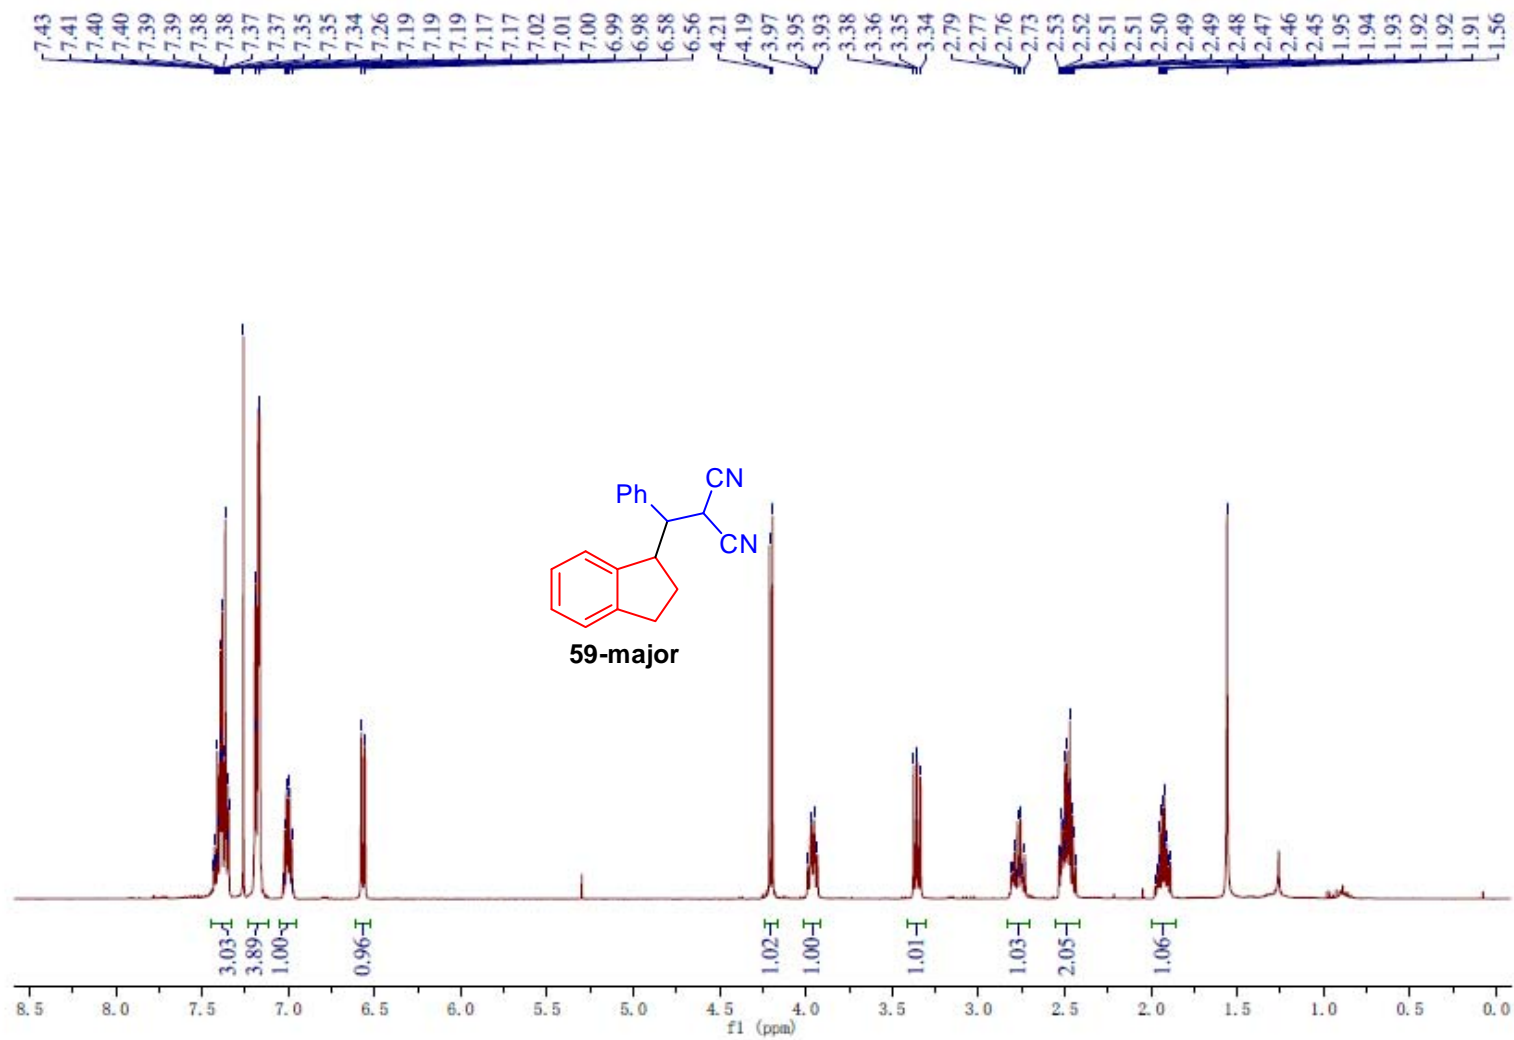



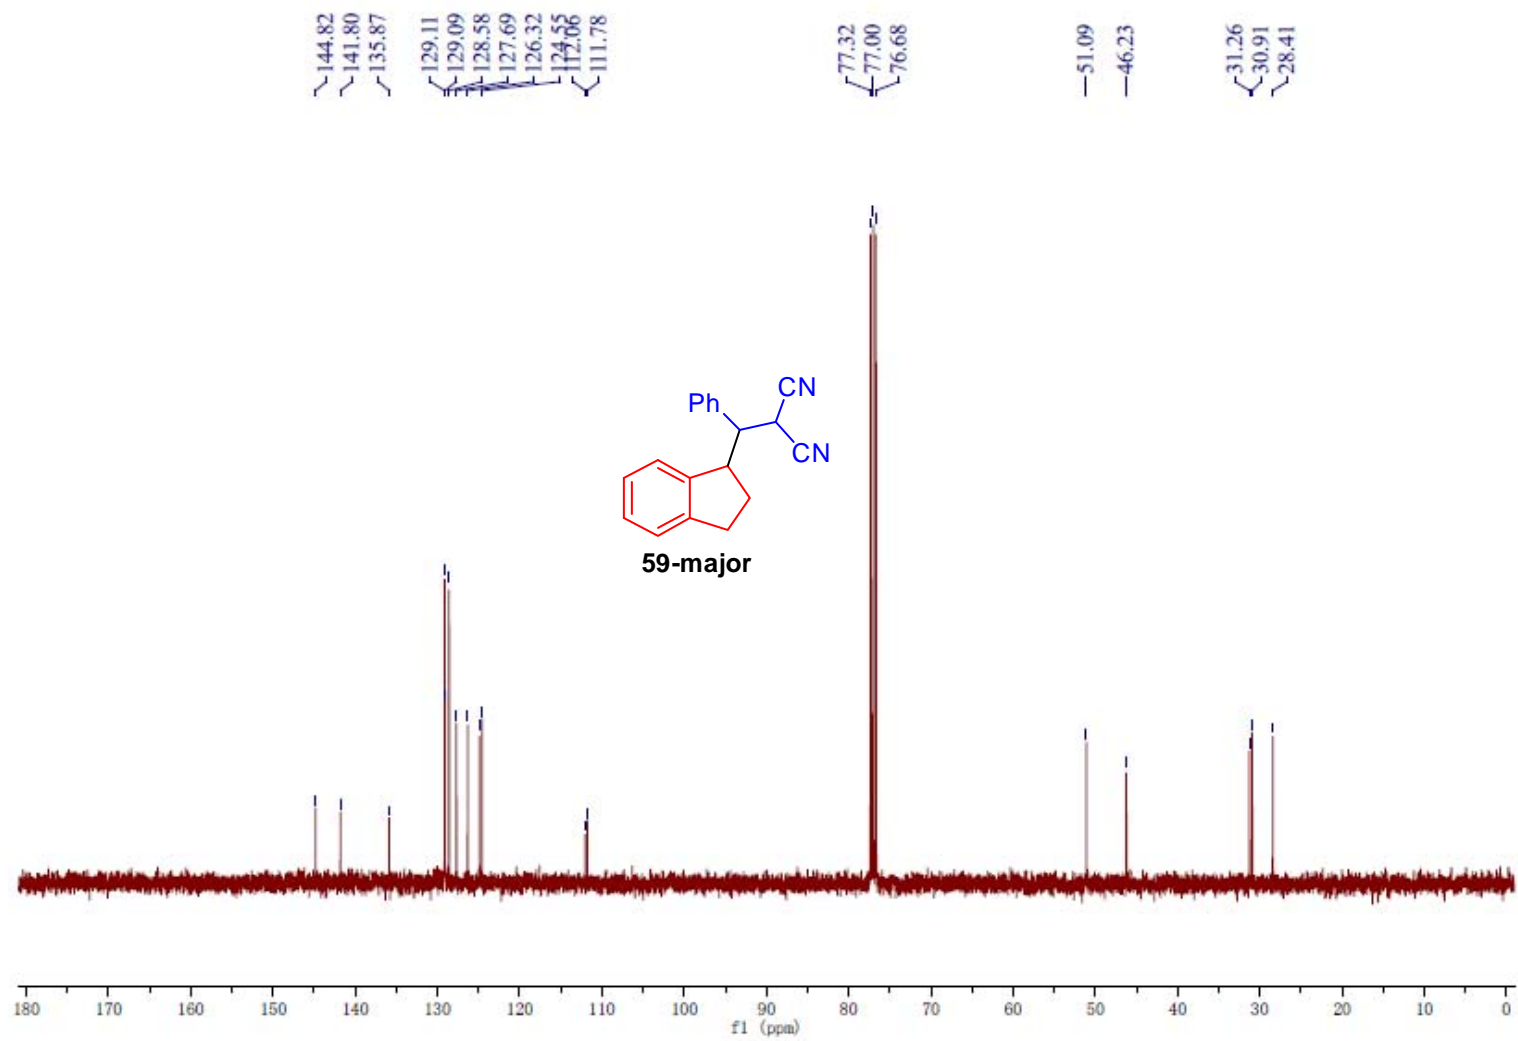

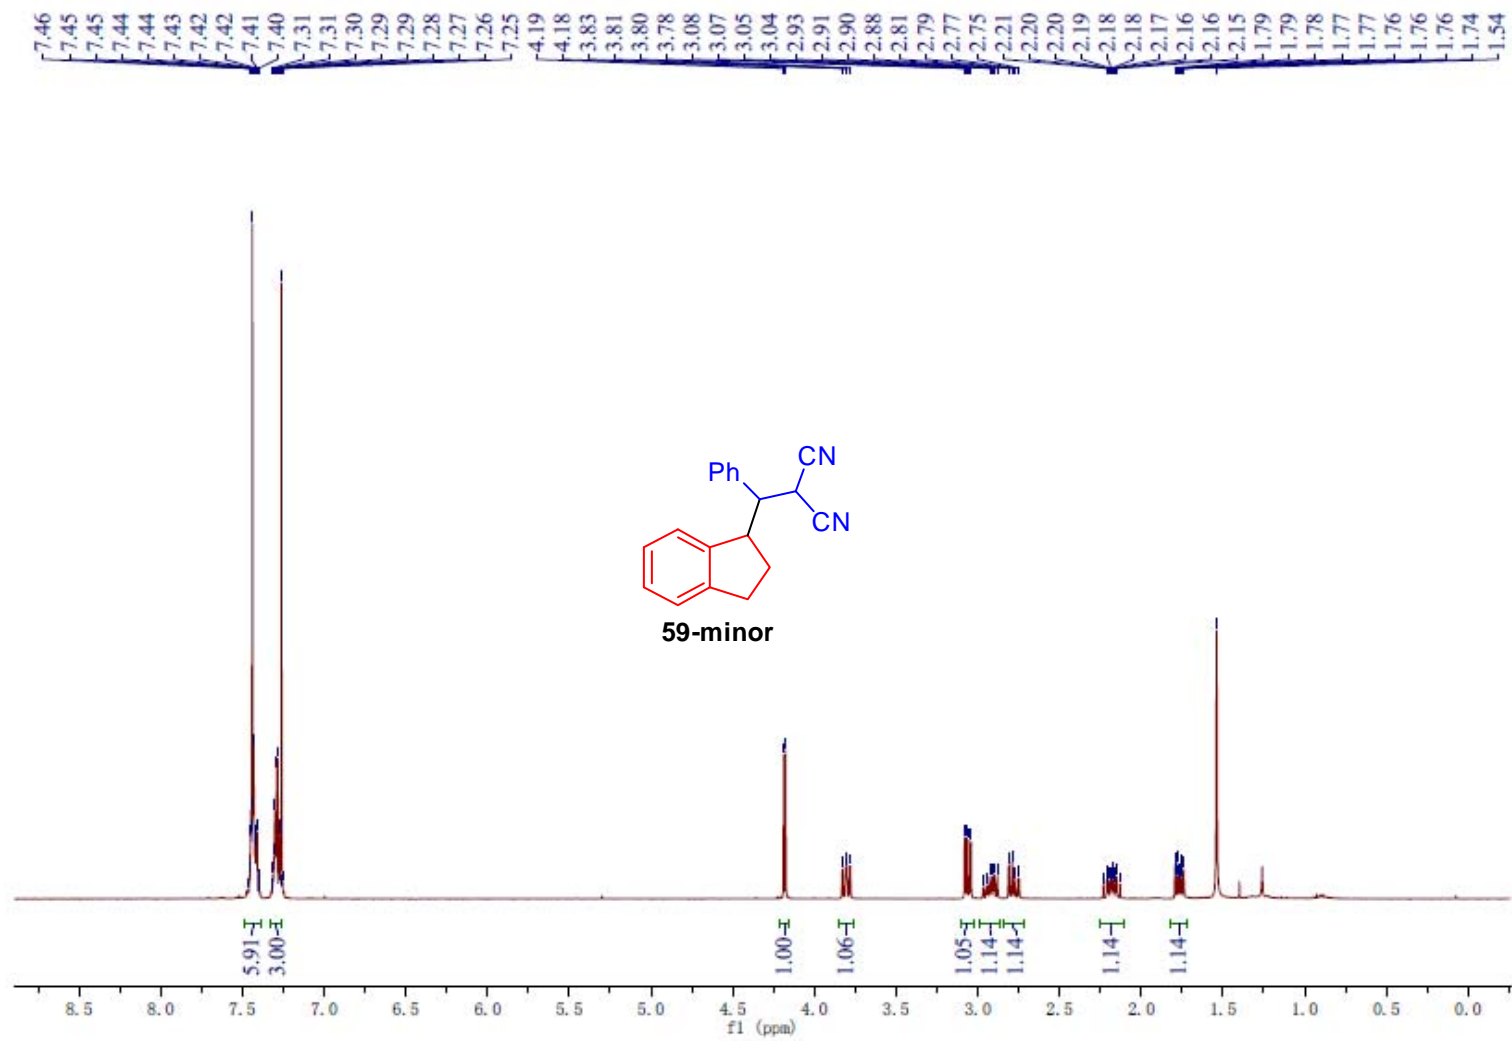

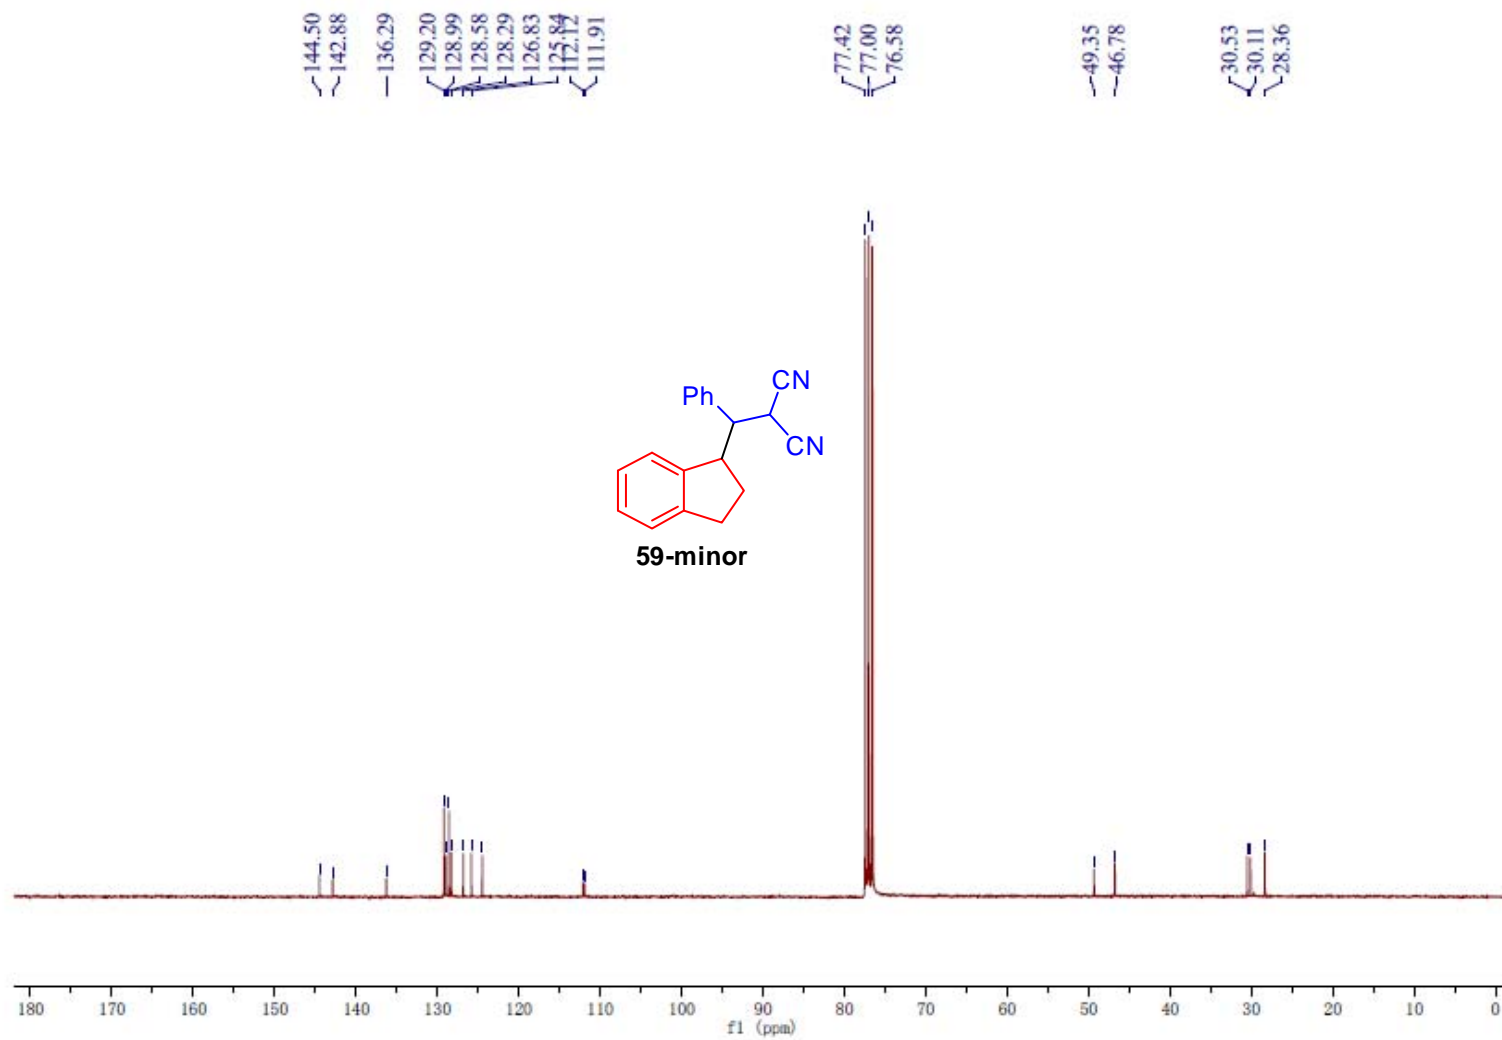

1-133  
1H NMR  
LHW-133

4.01  
4.00  
3.48  
3.46  
3.44  
3.43  
3.42  
3.41  
3.35  
3.34  
2.44  
1.57

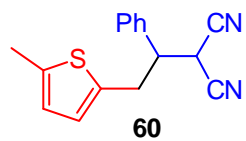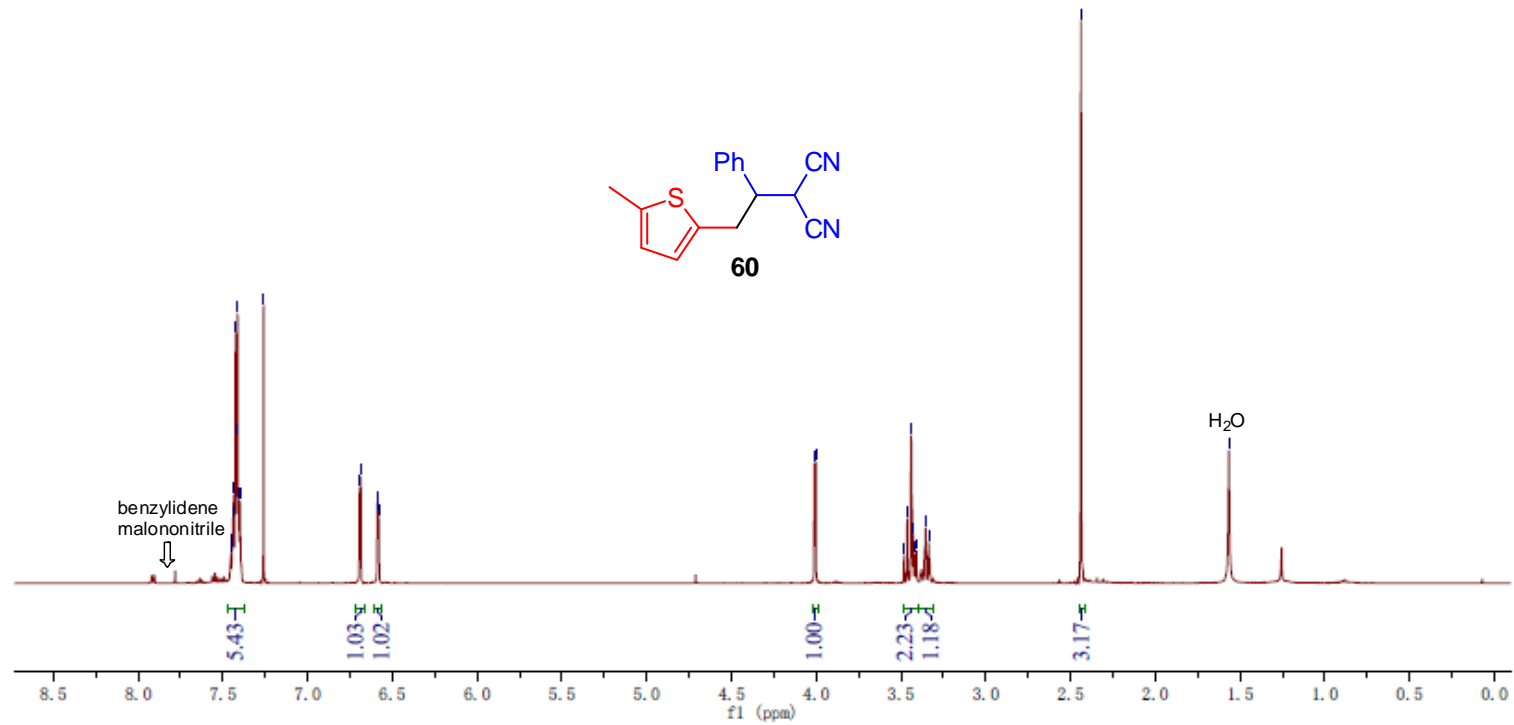

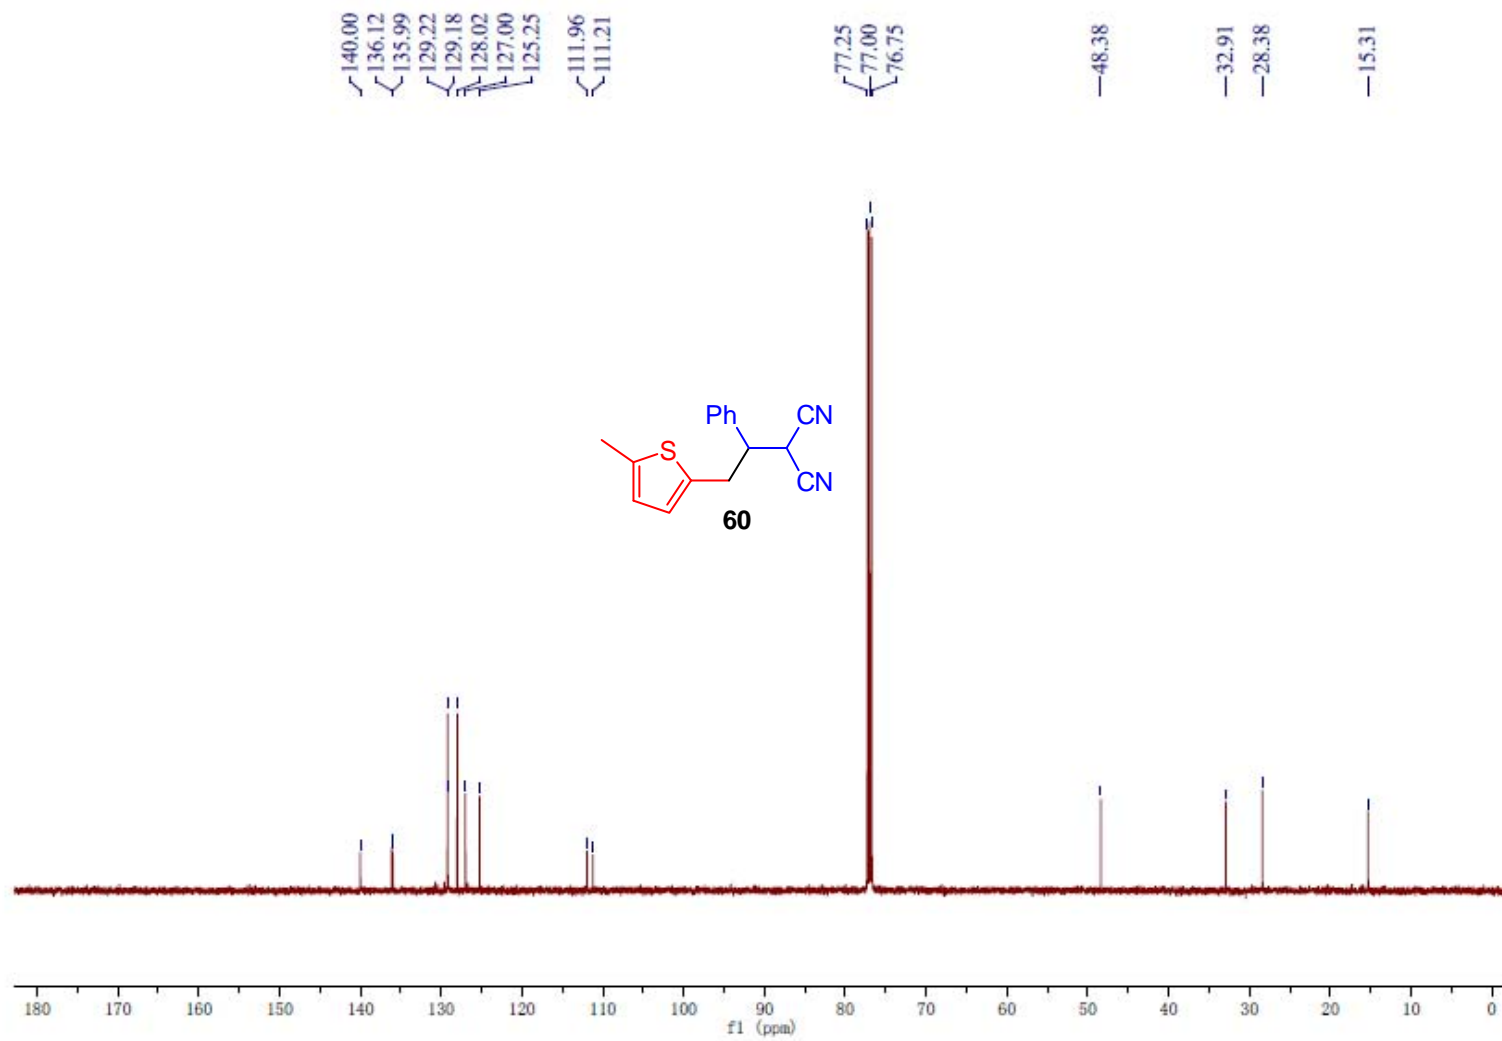

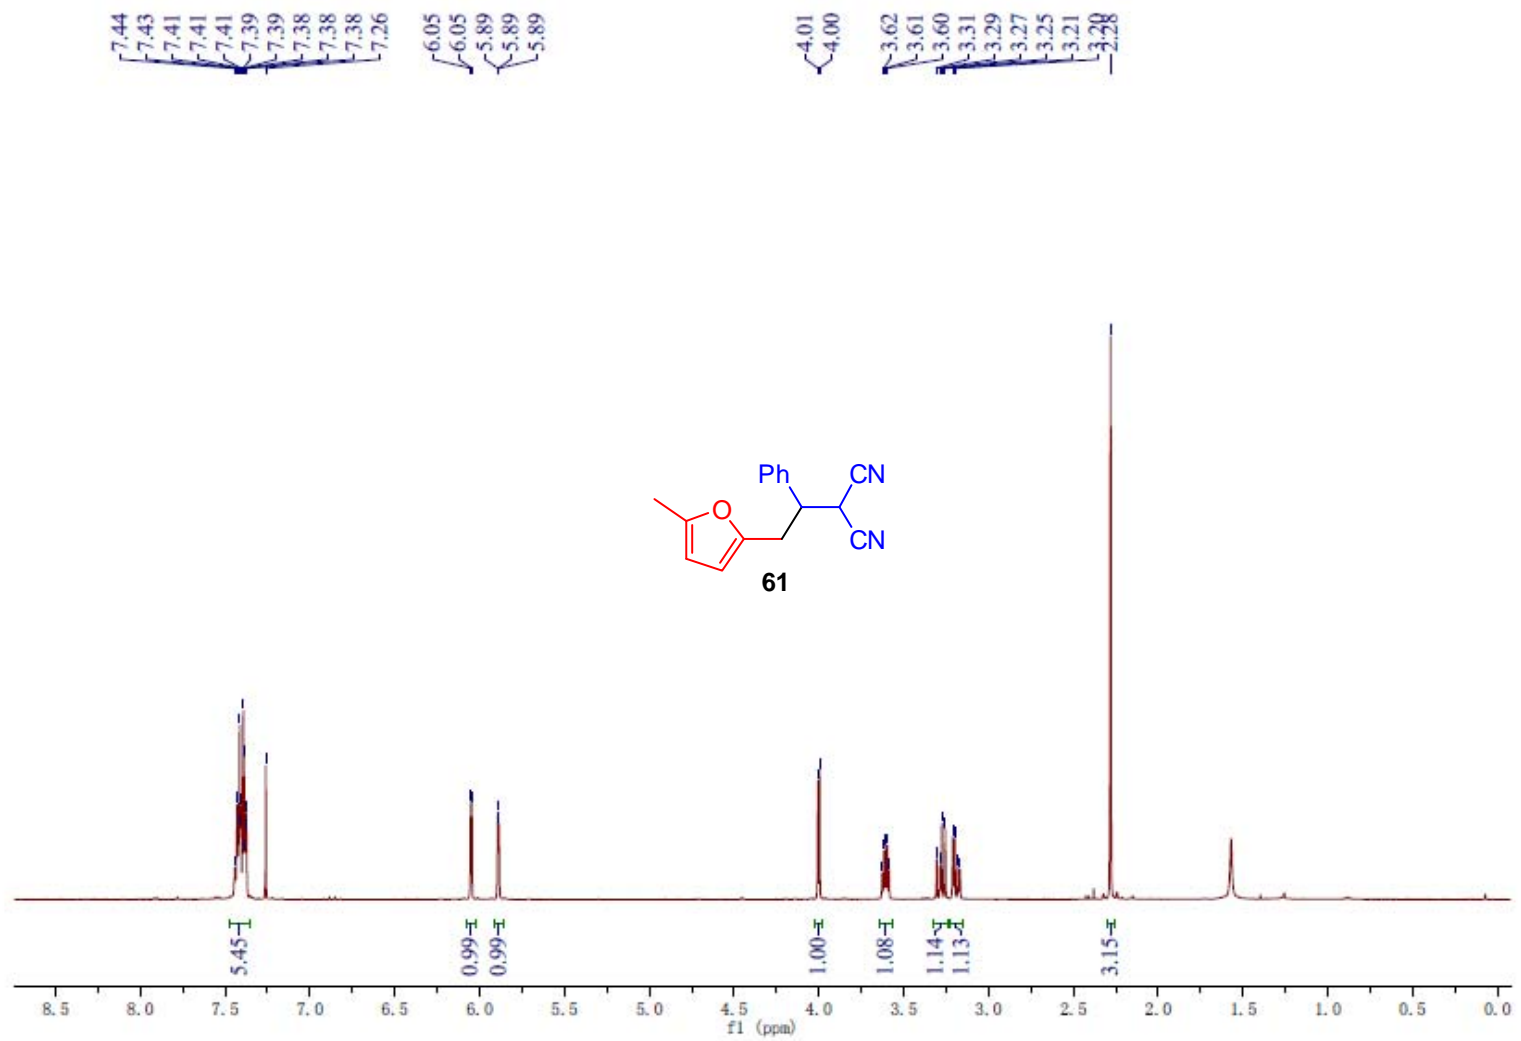

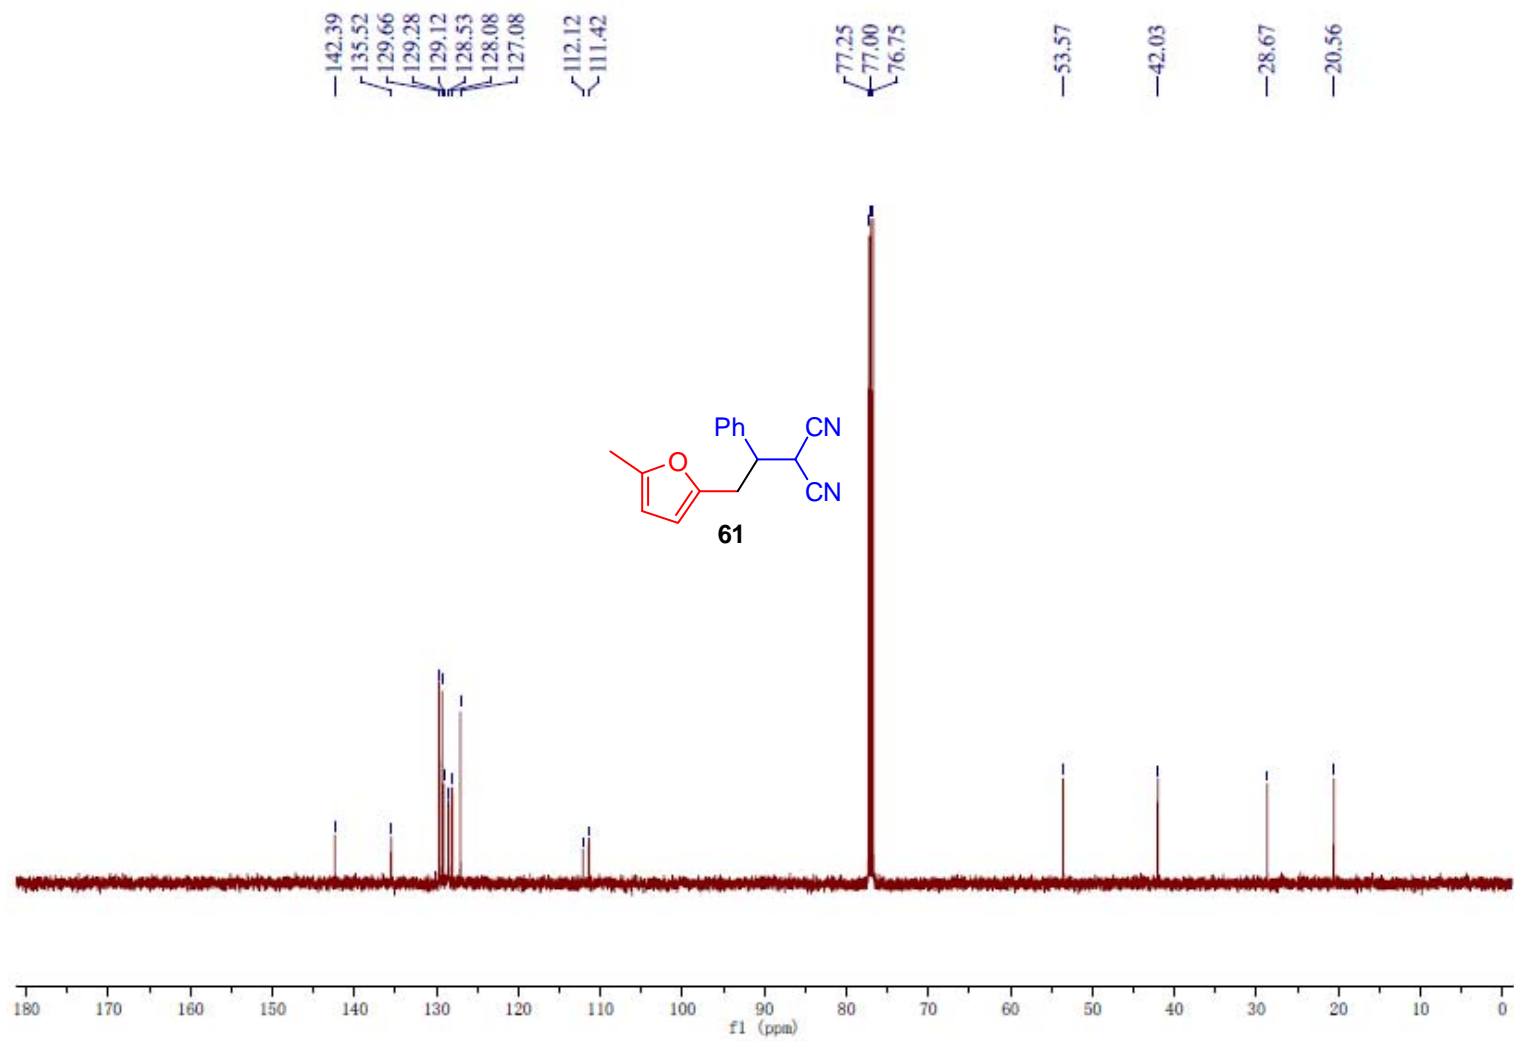

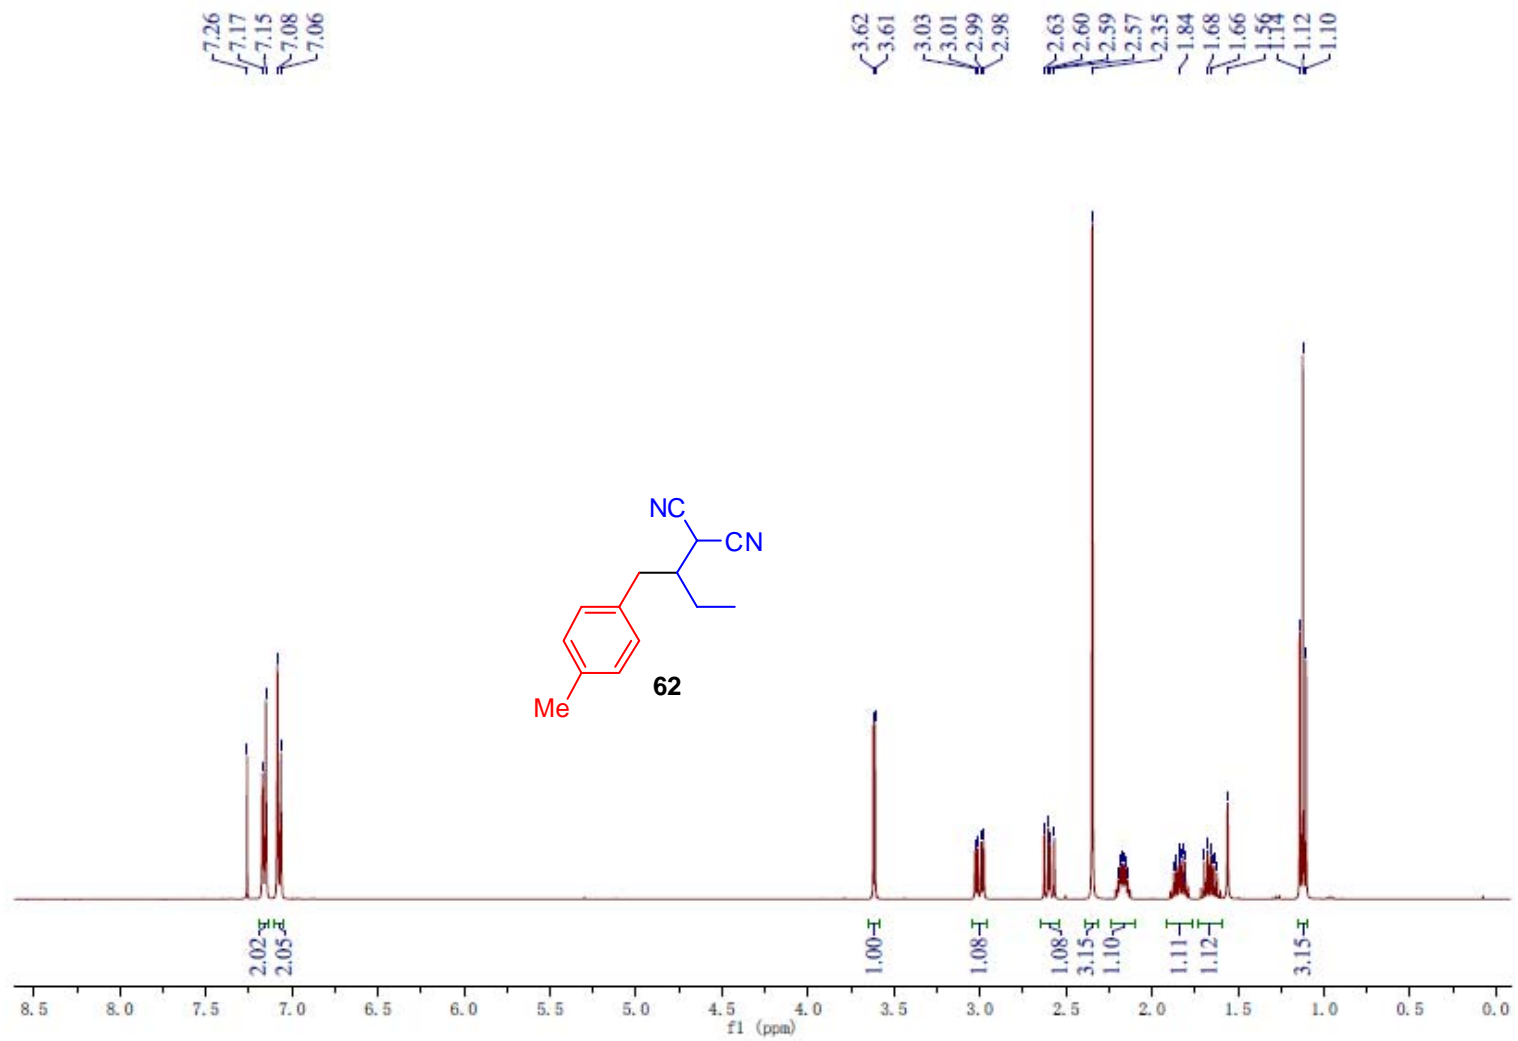



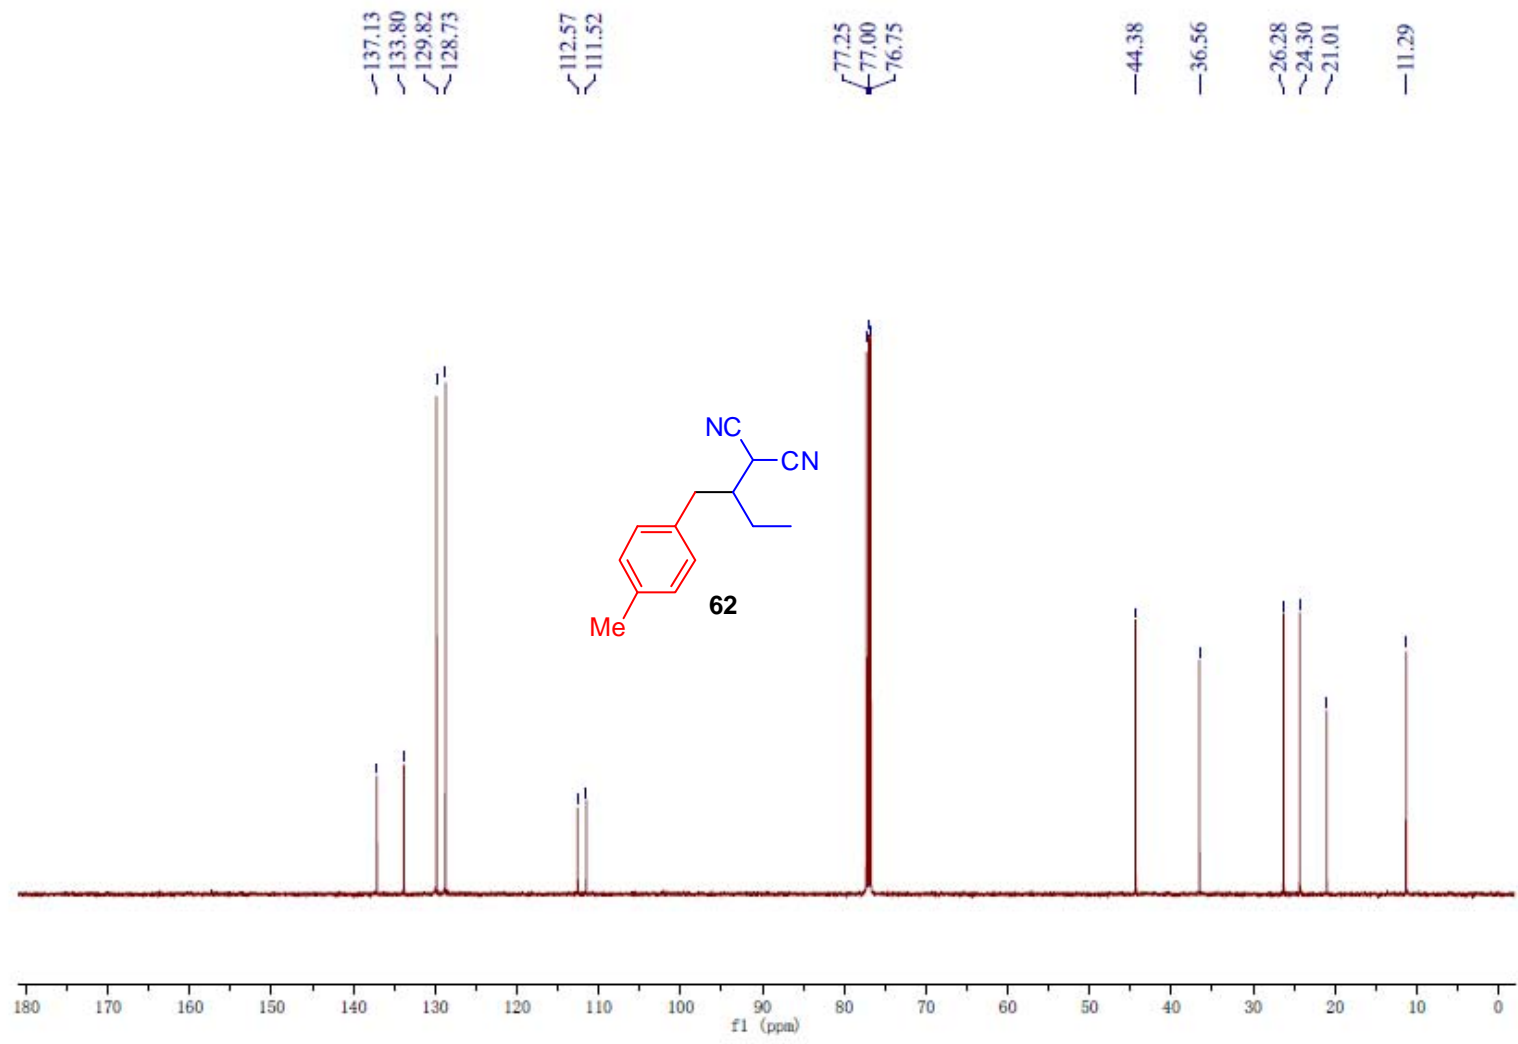

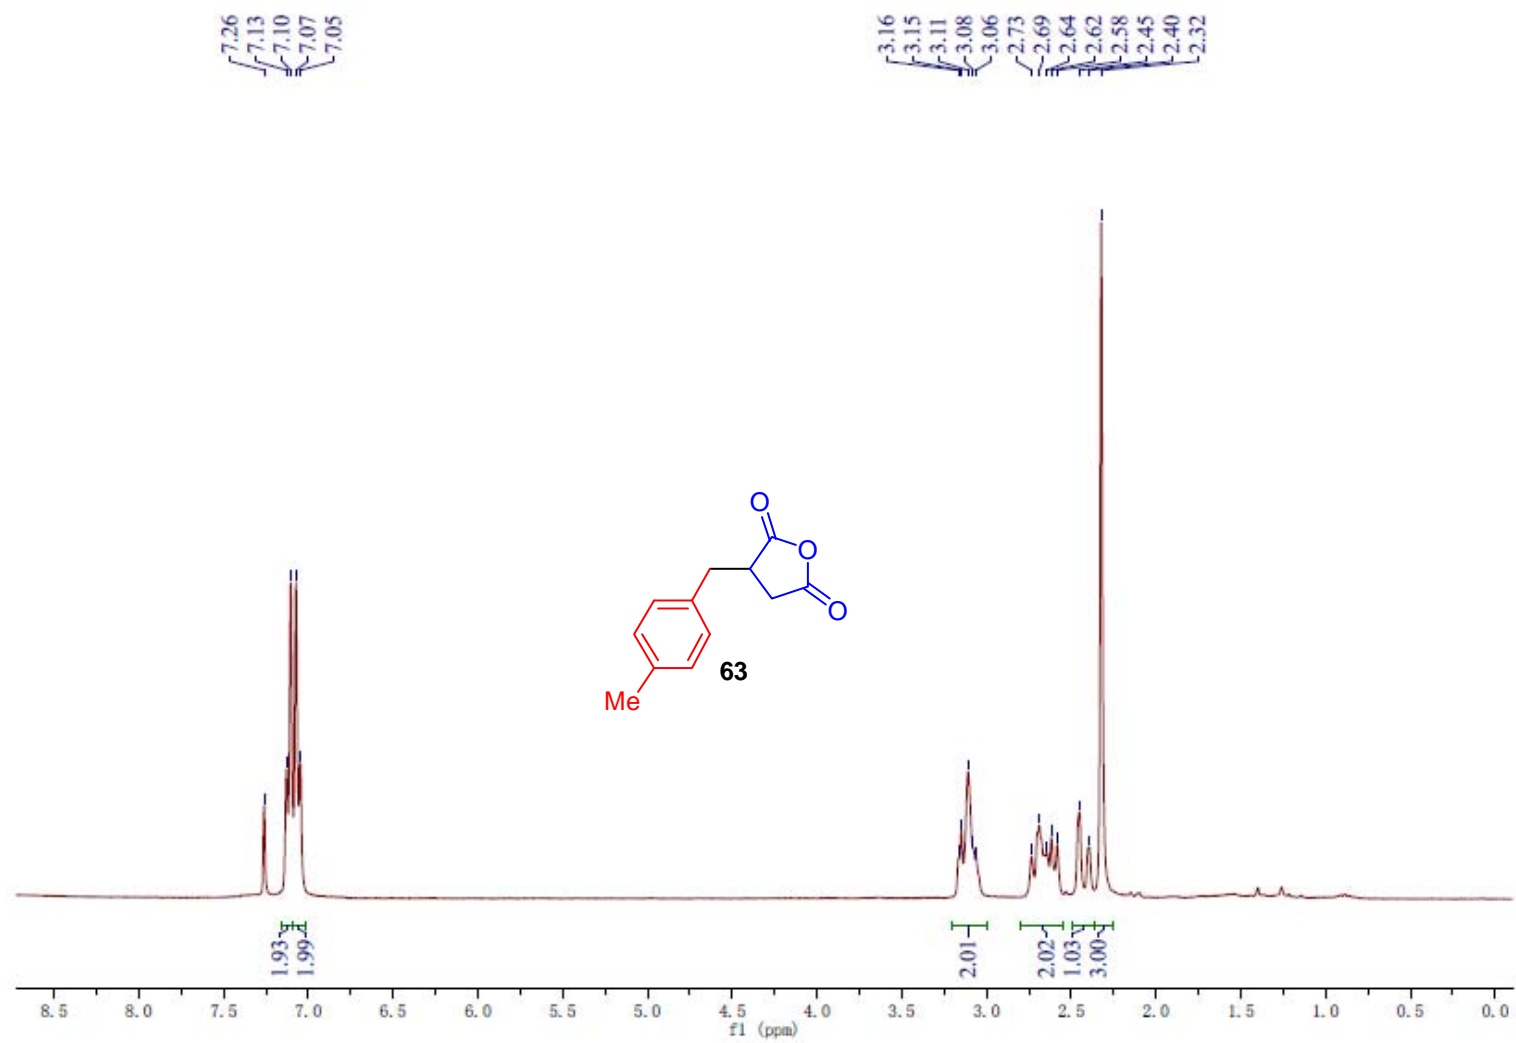

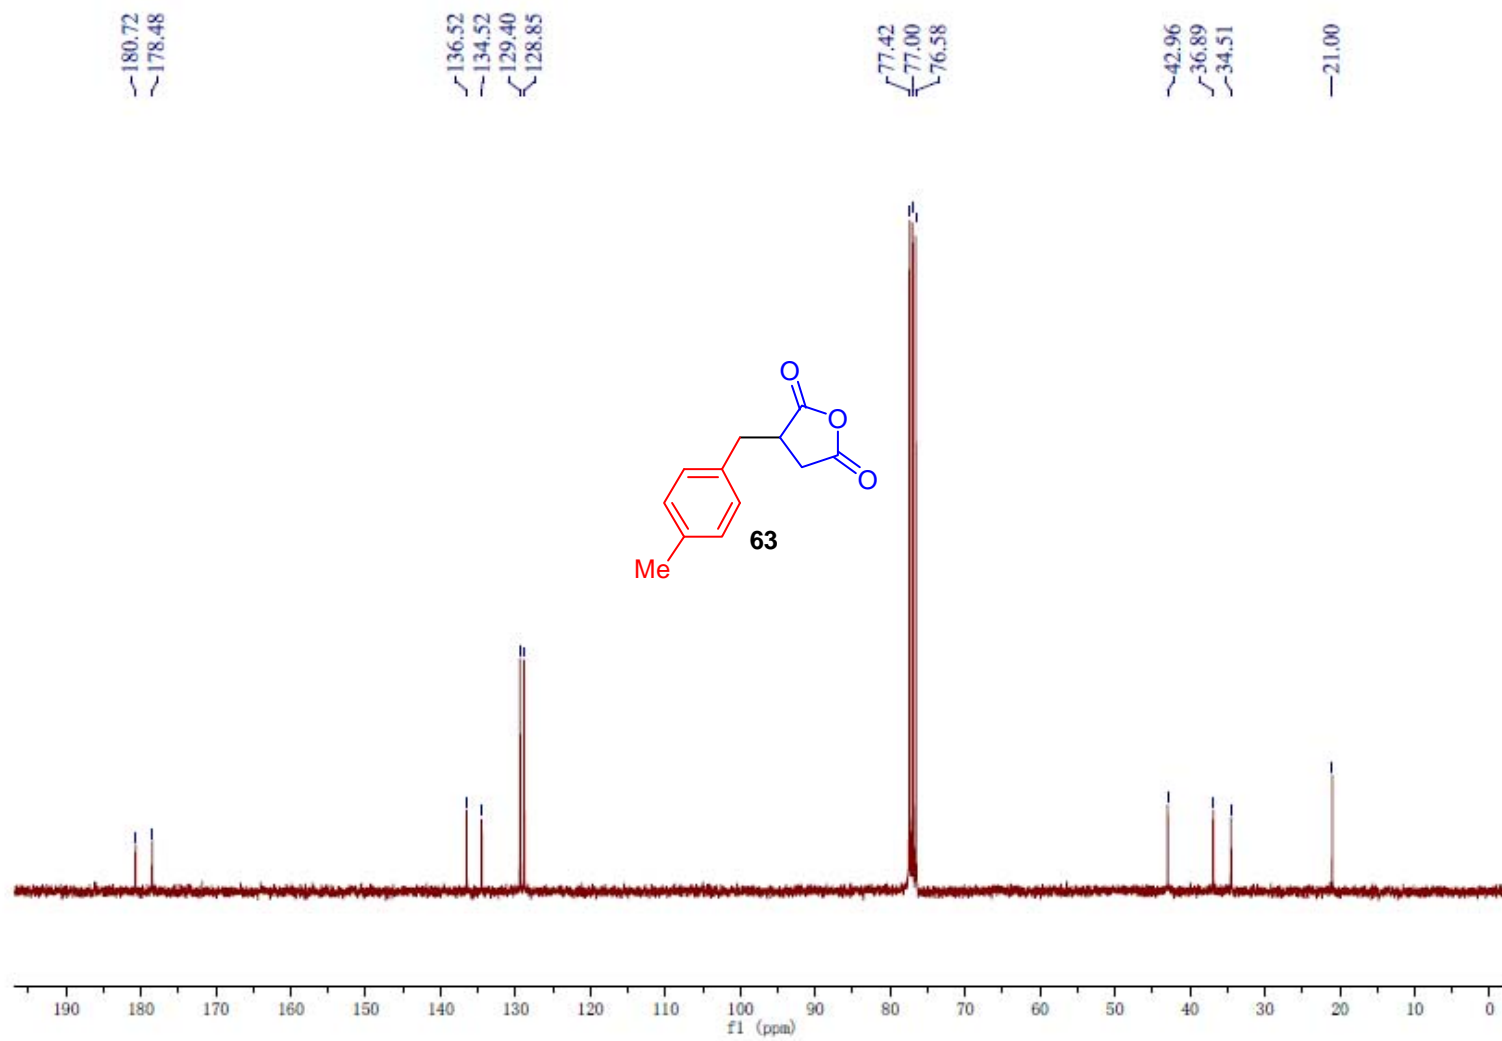

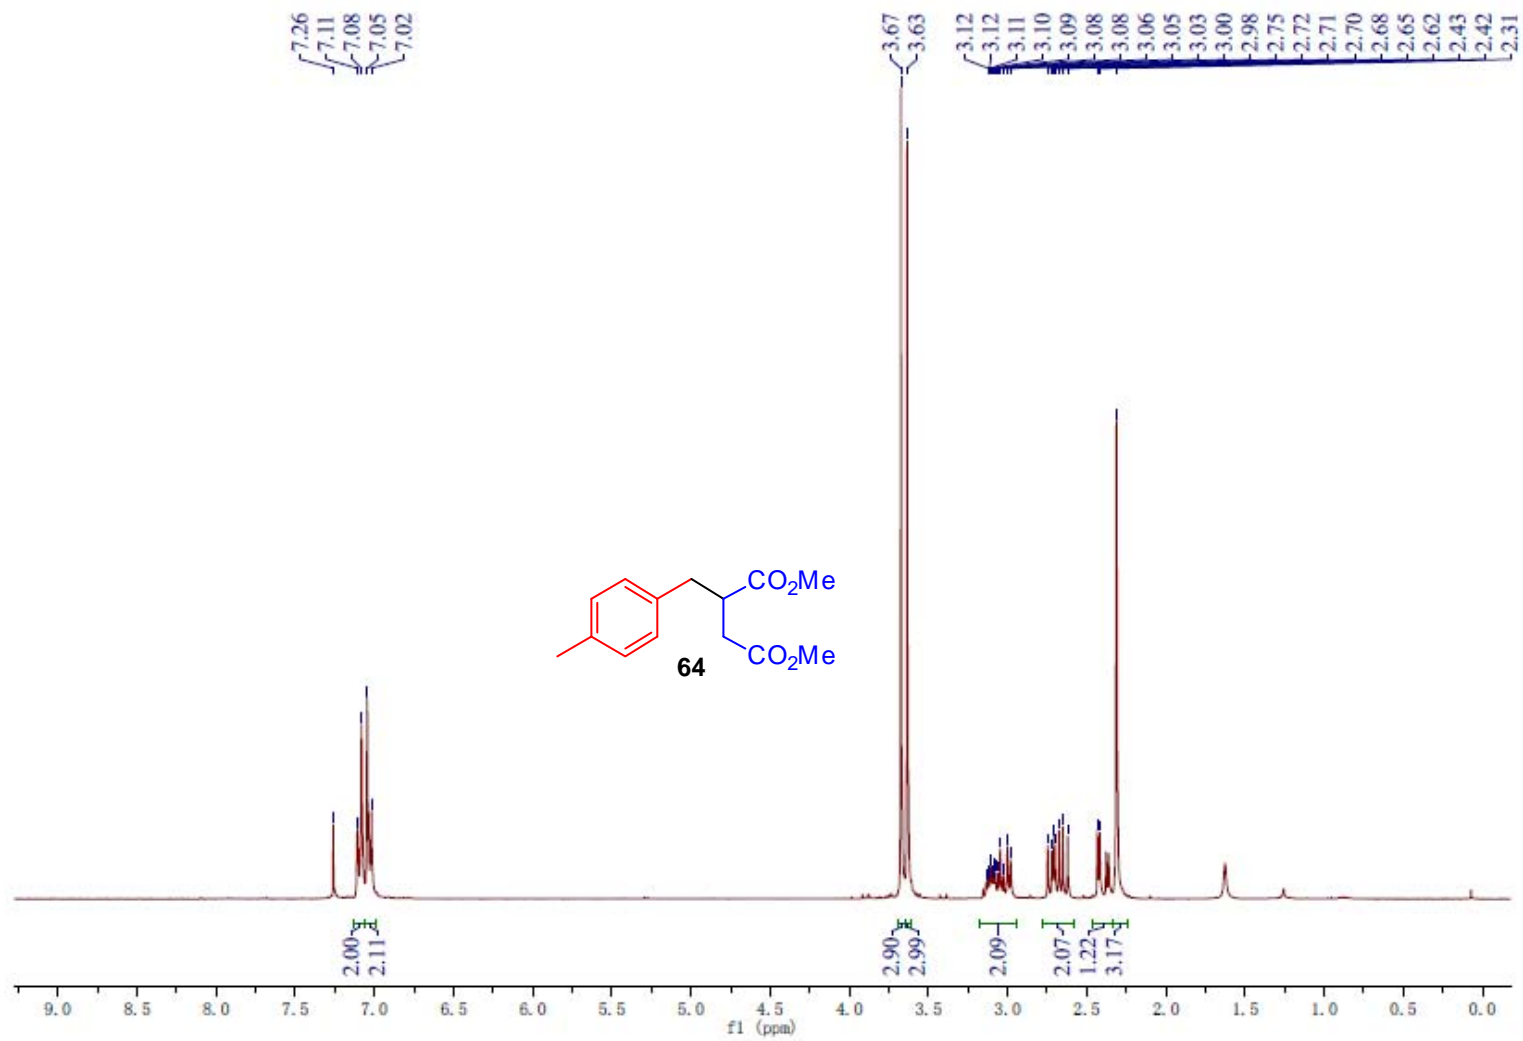

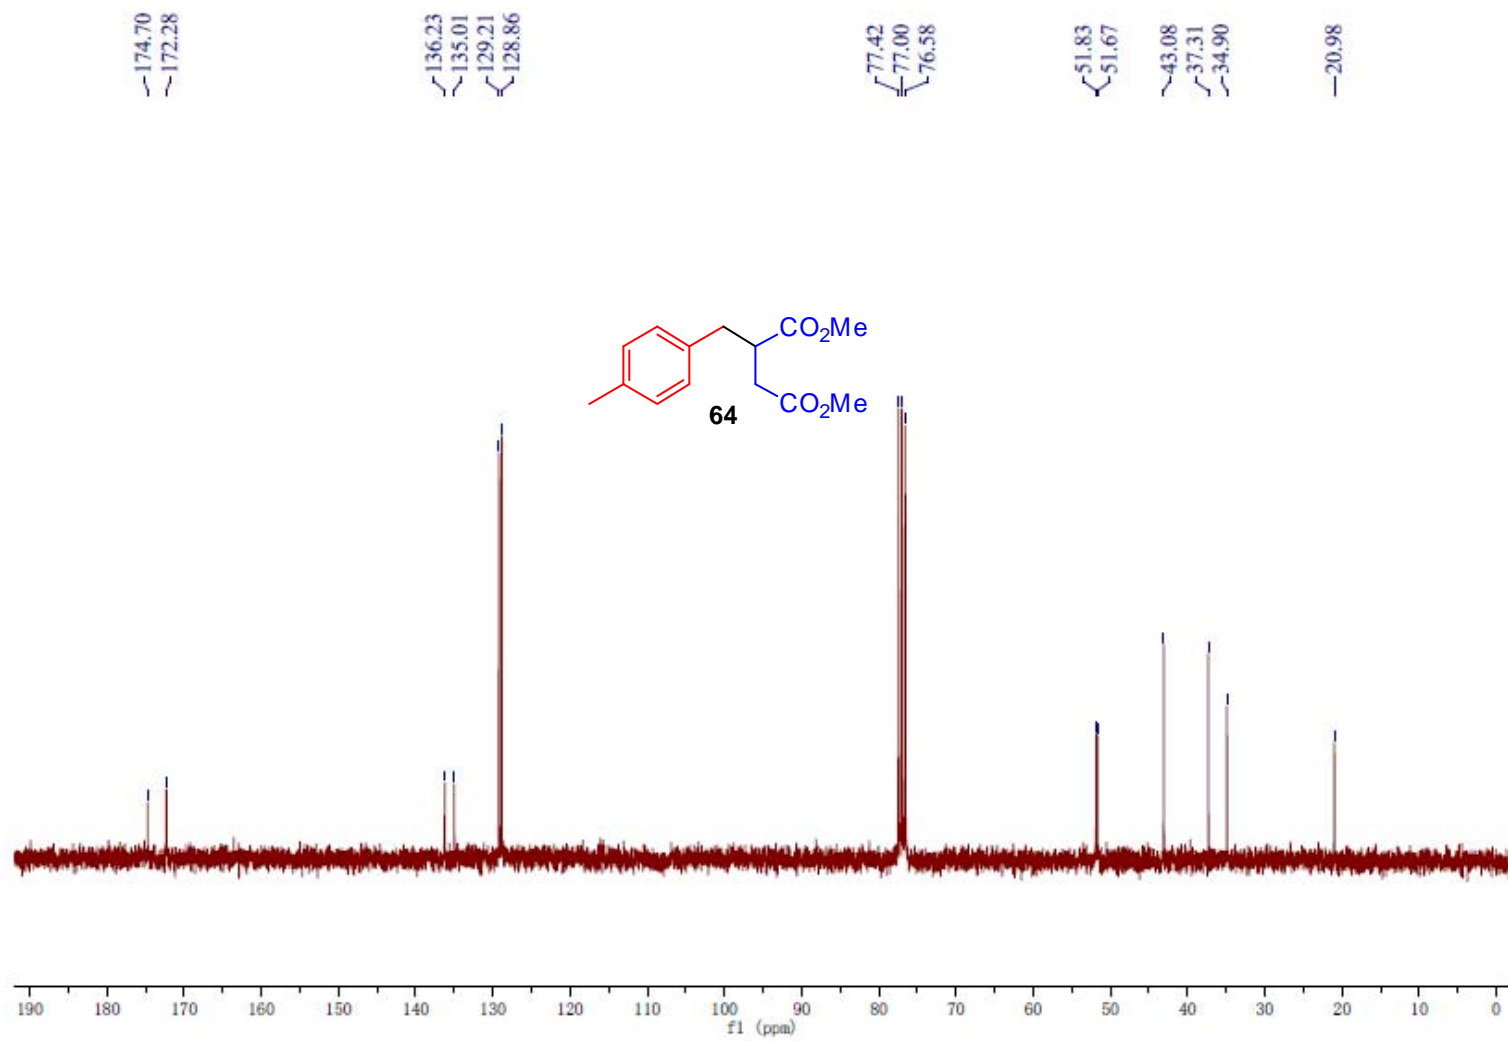

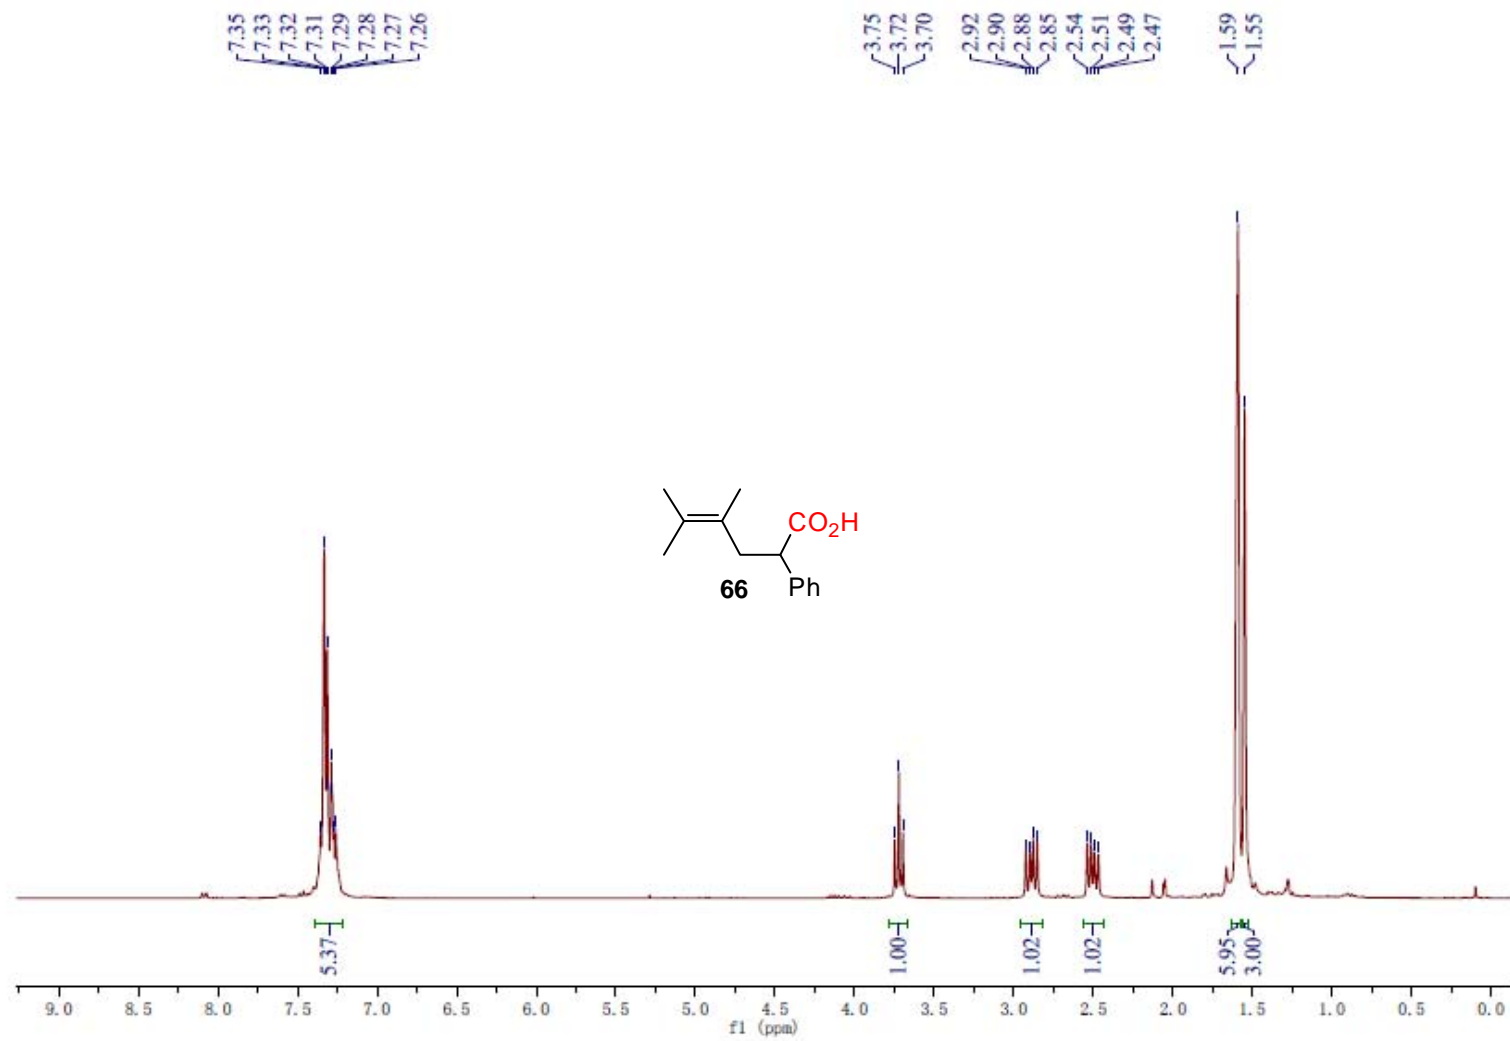

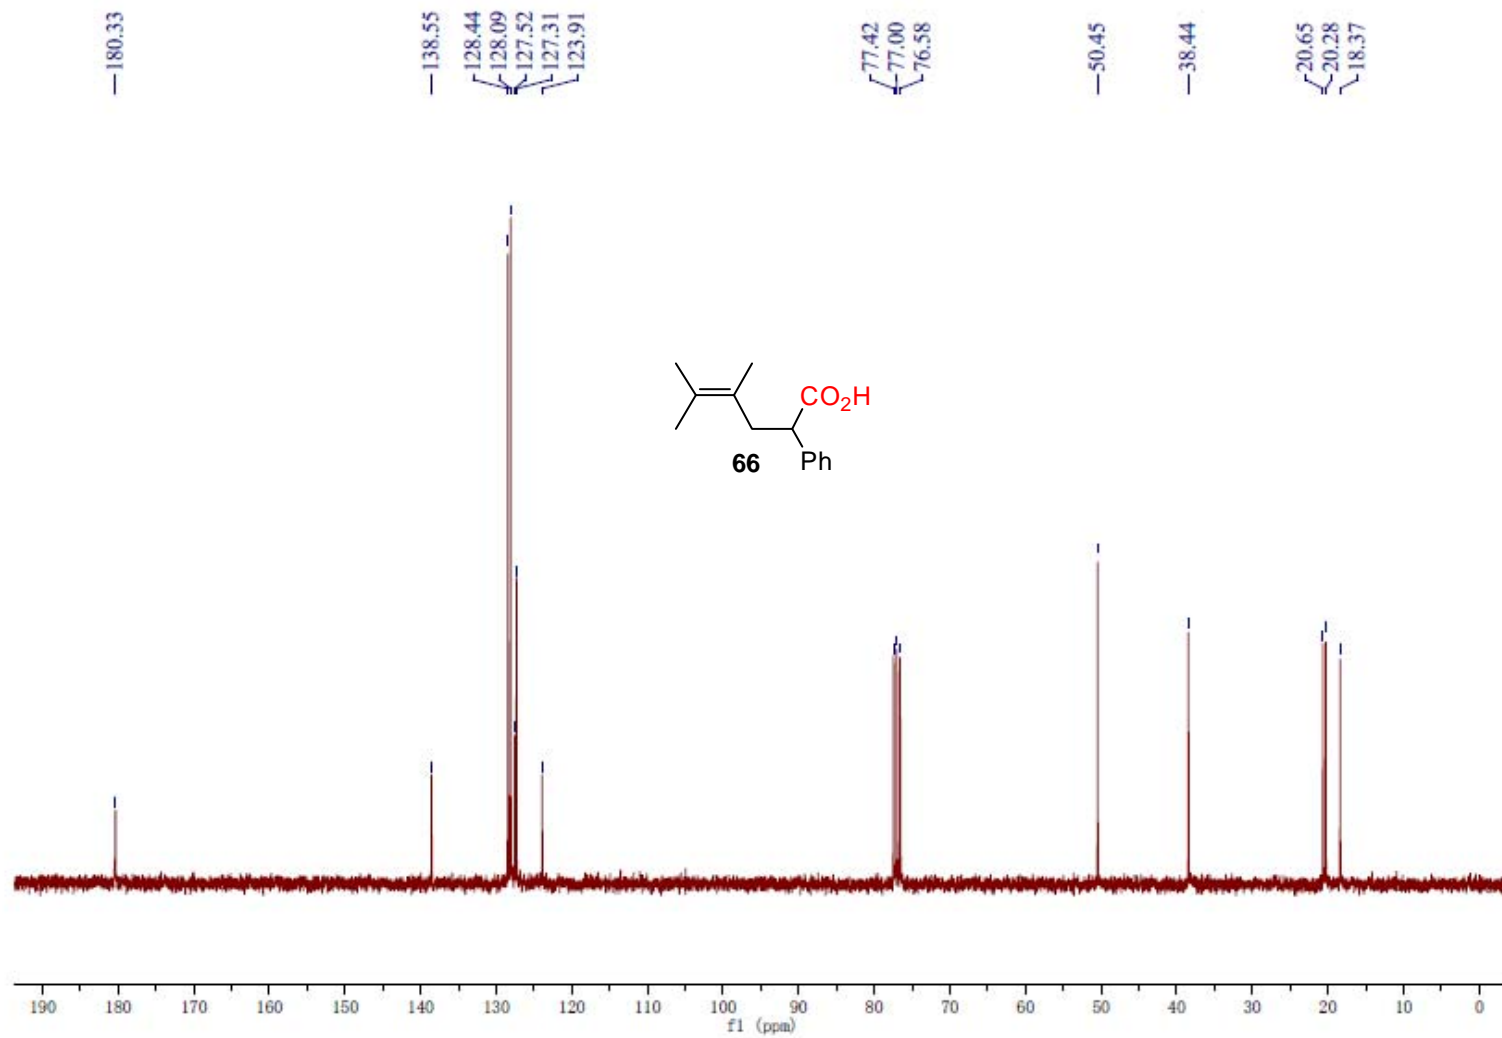

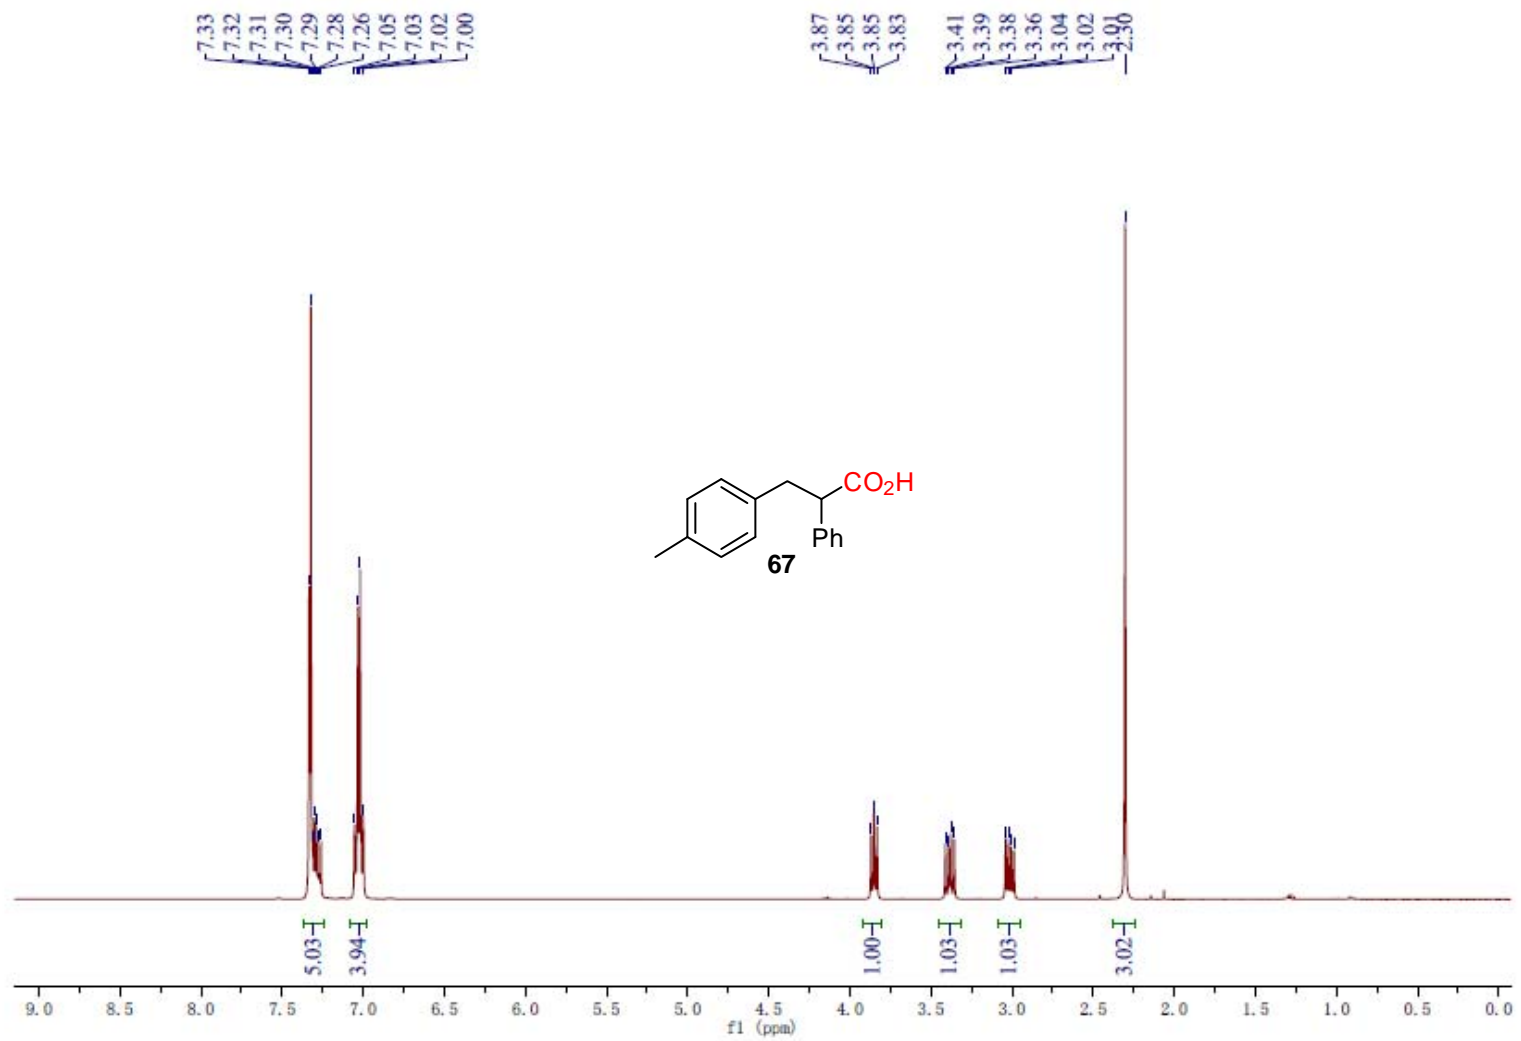



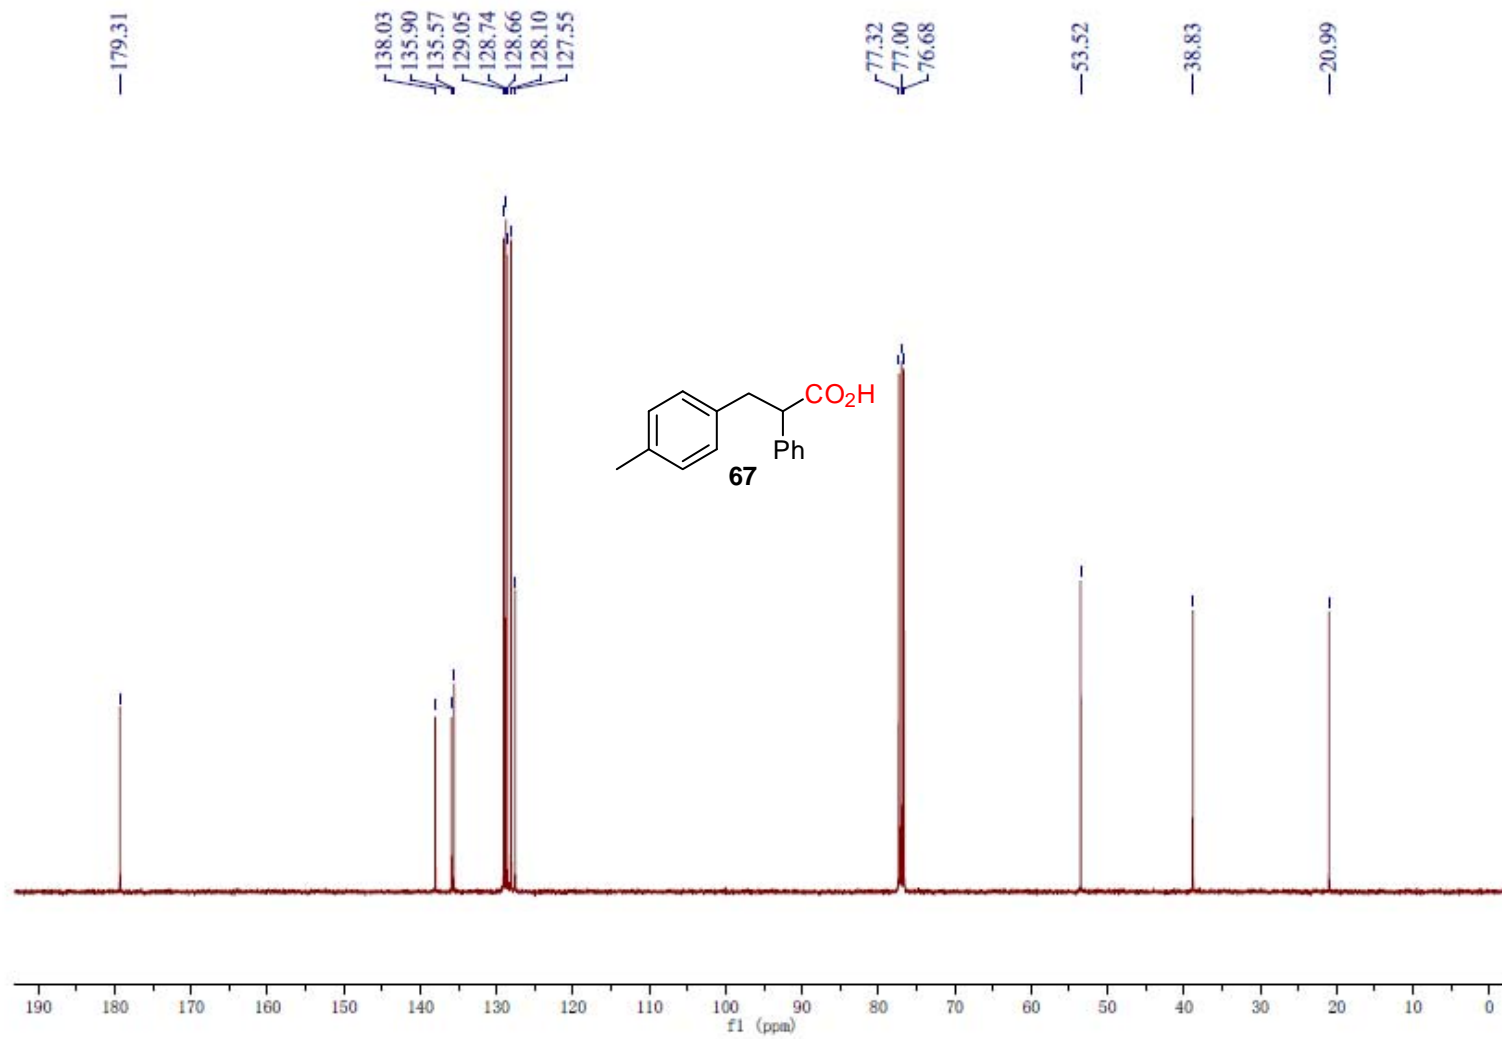

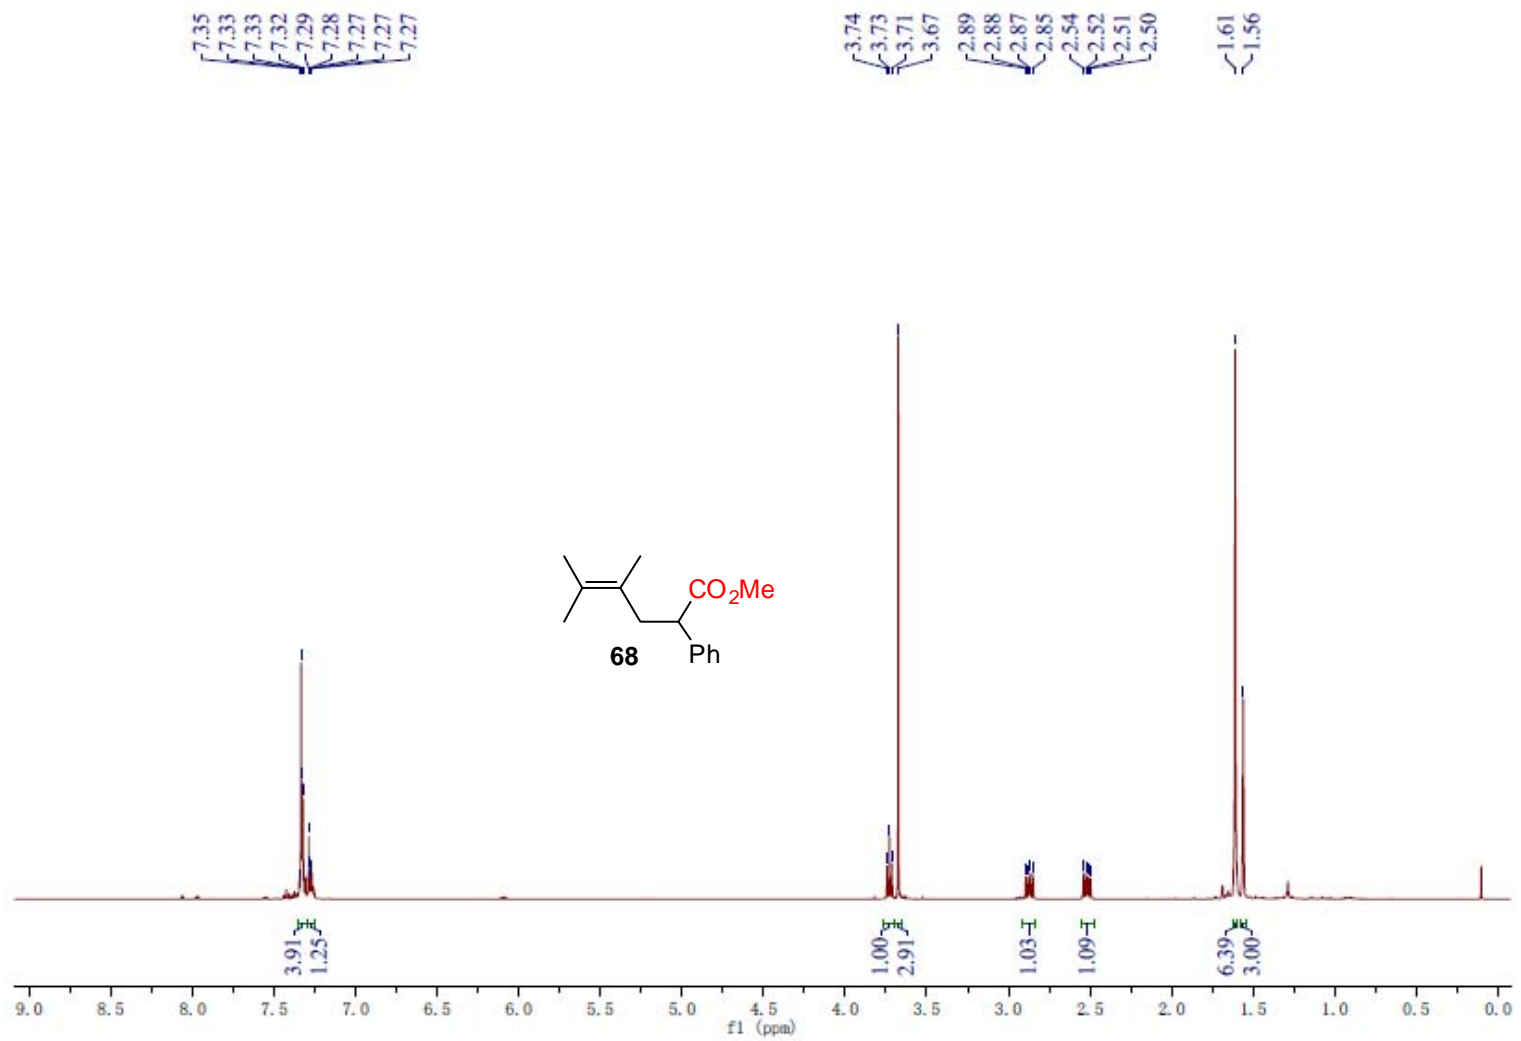

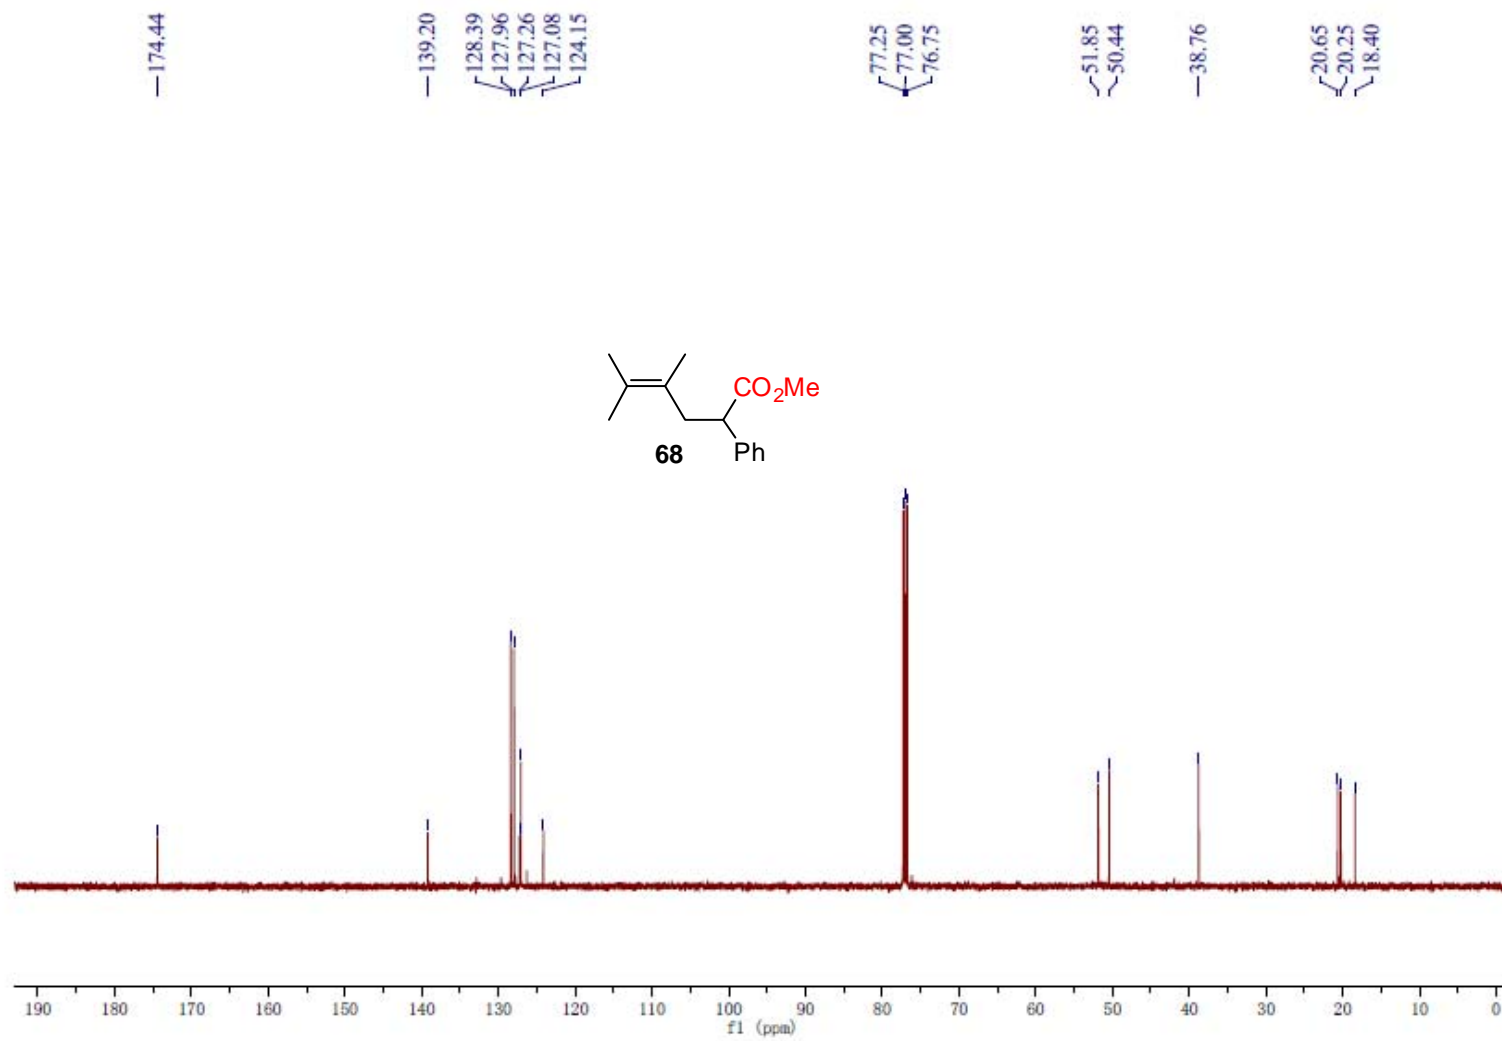

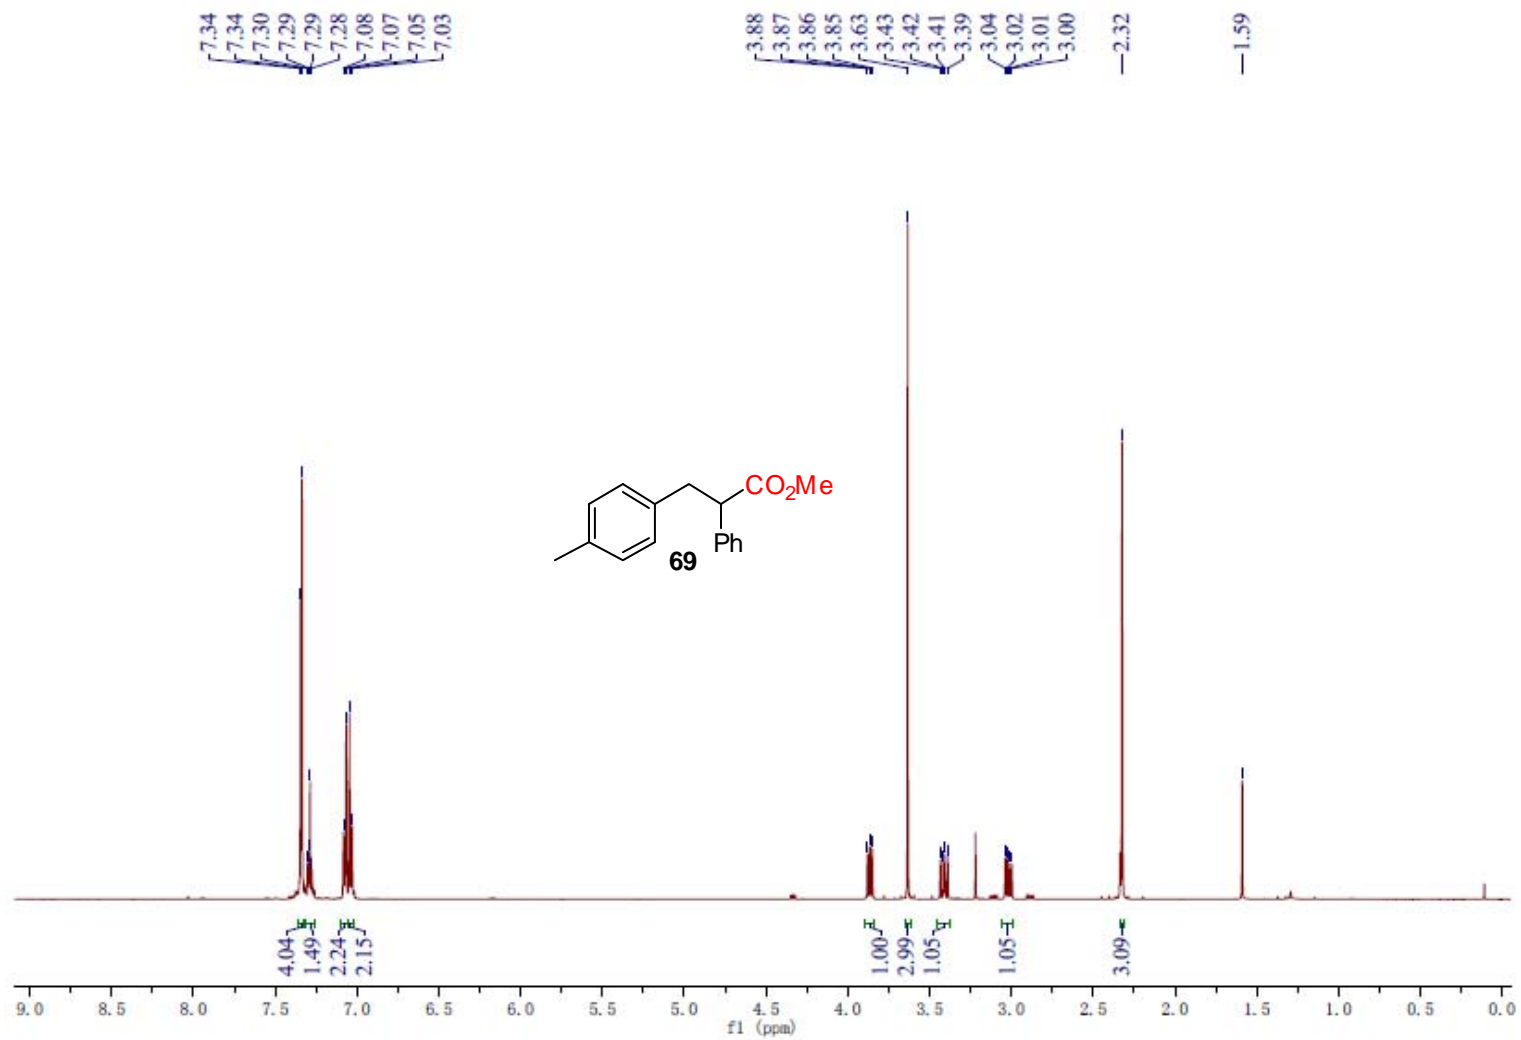

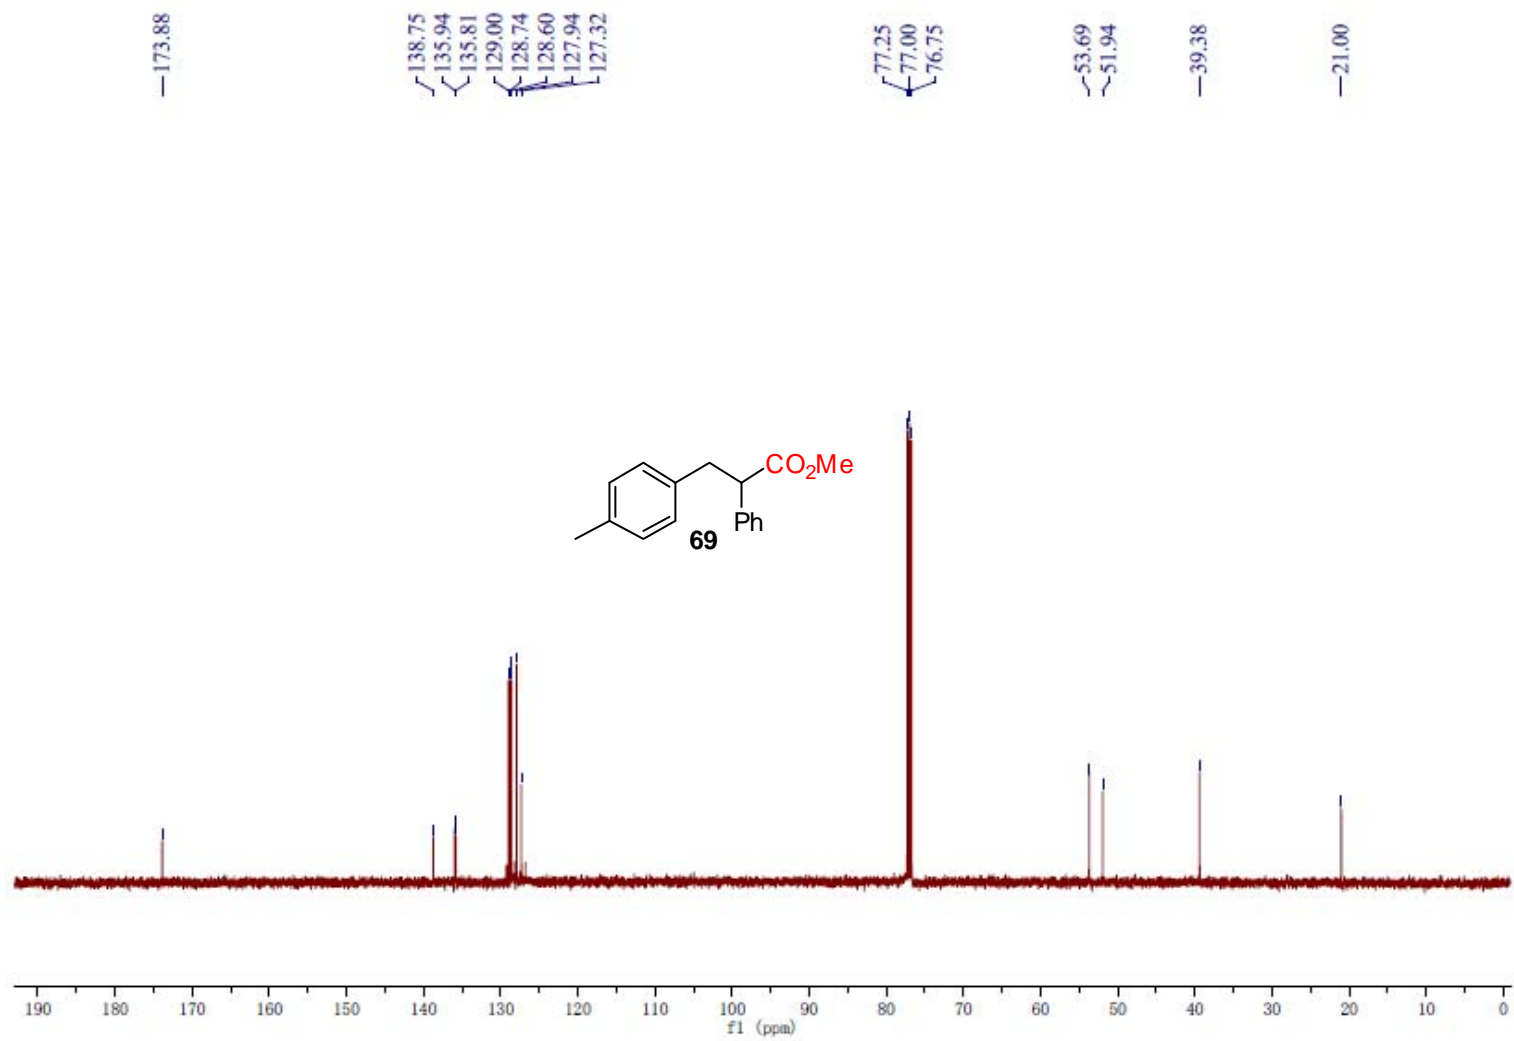

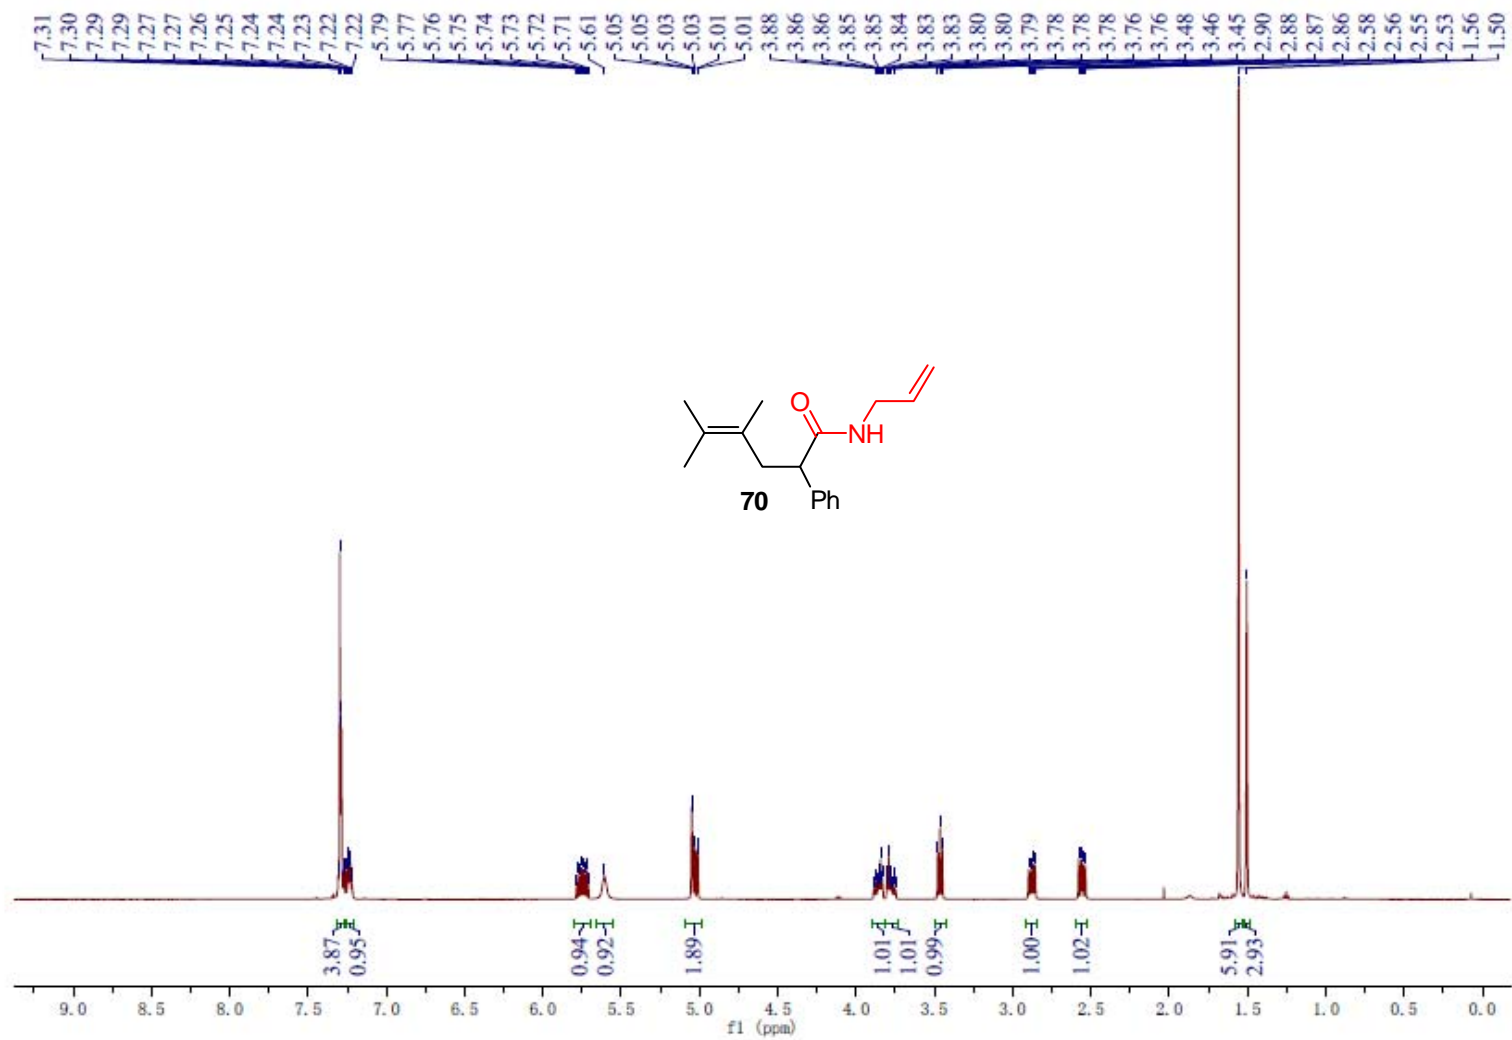

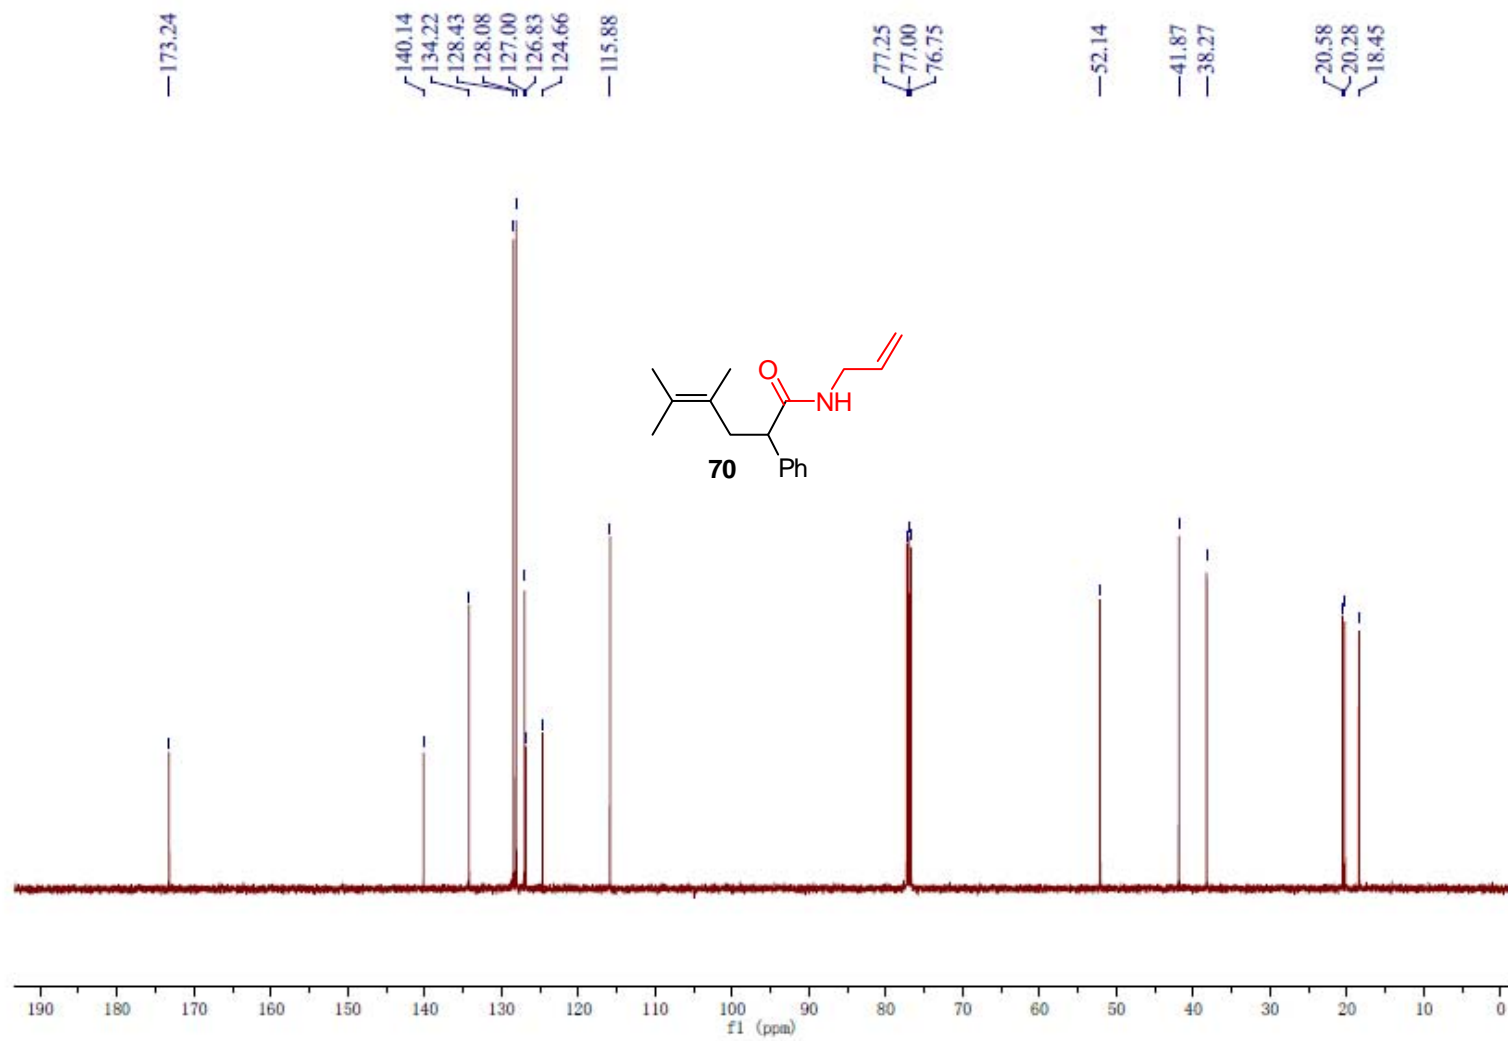

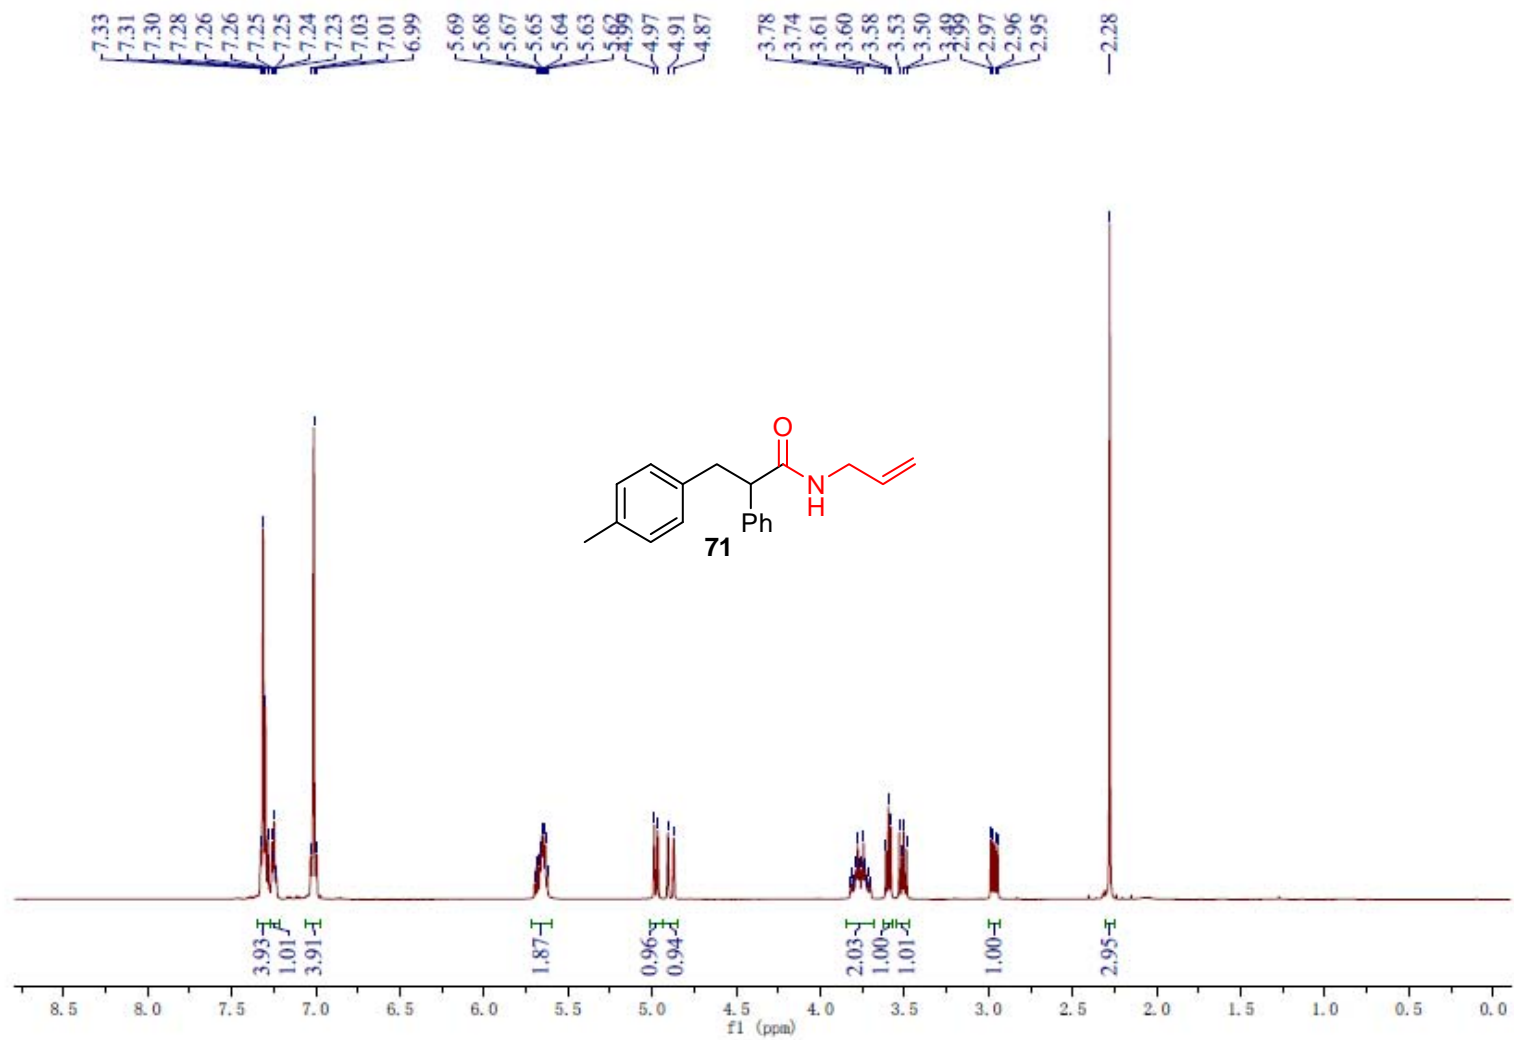



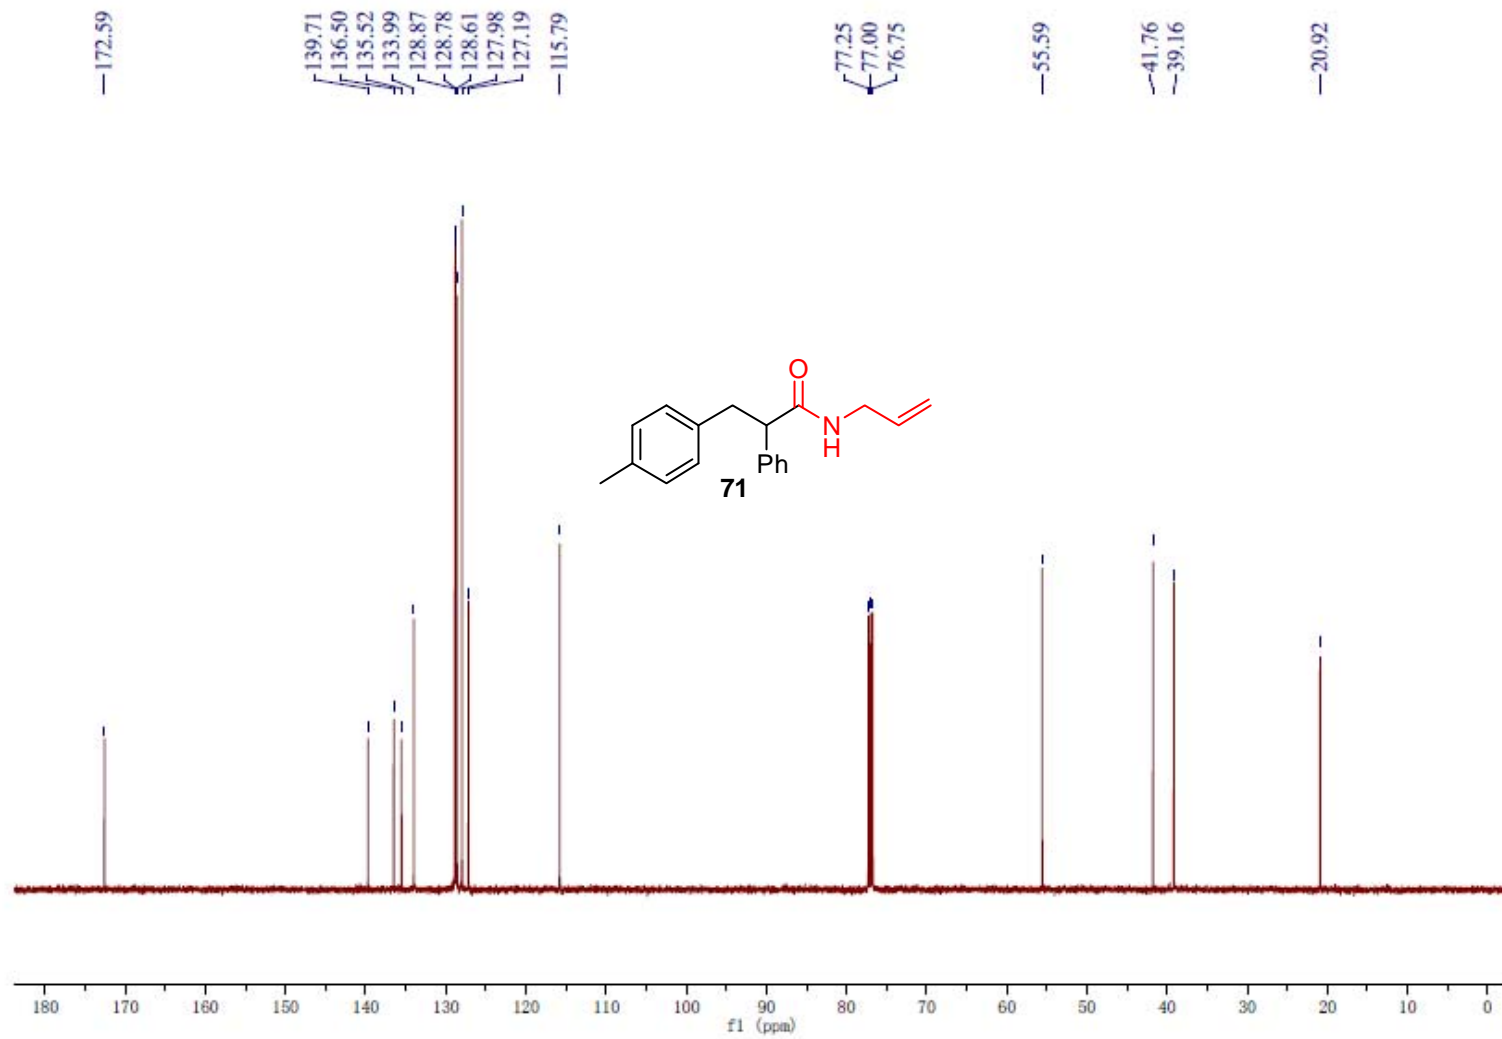

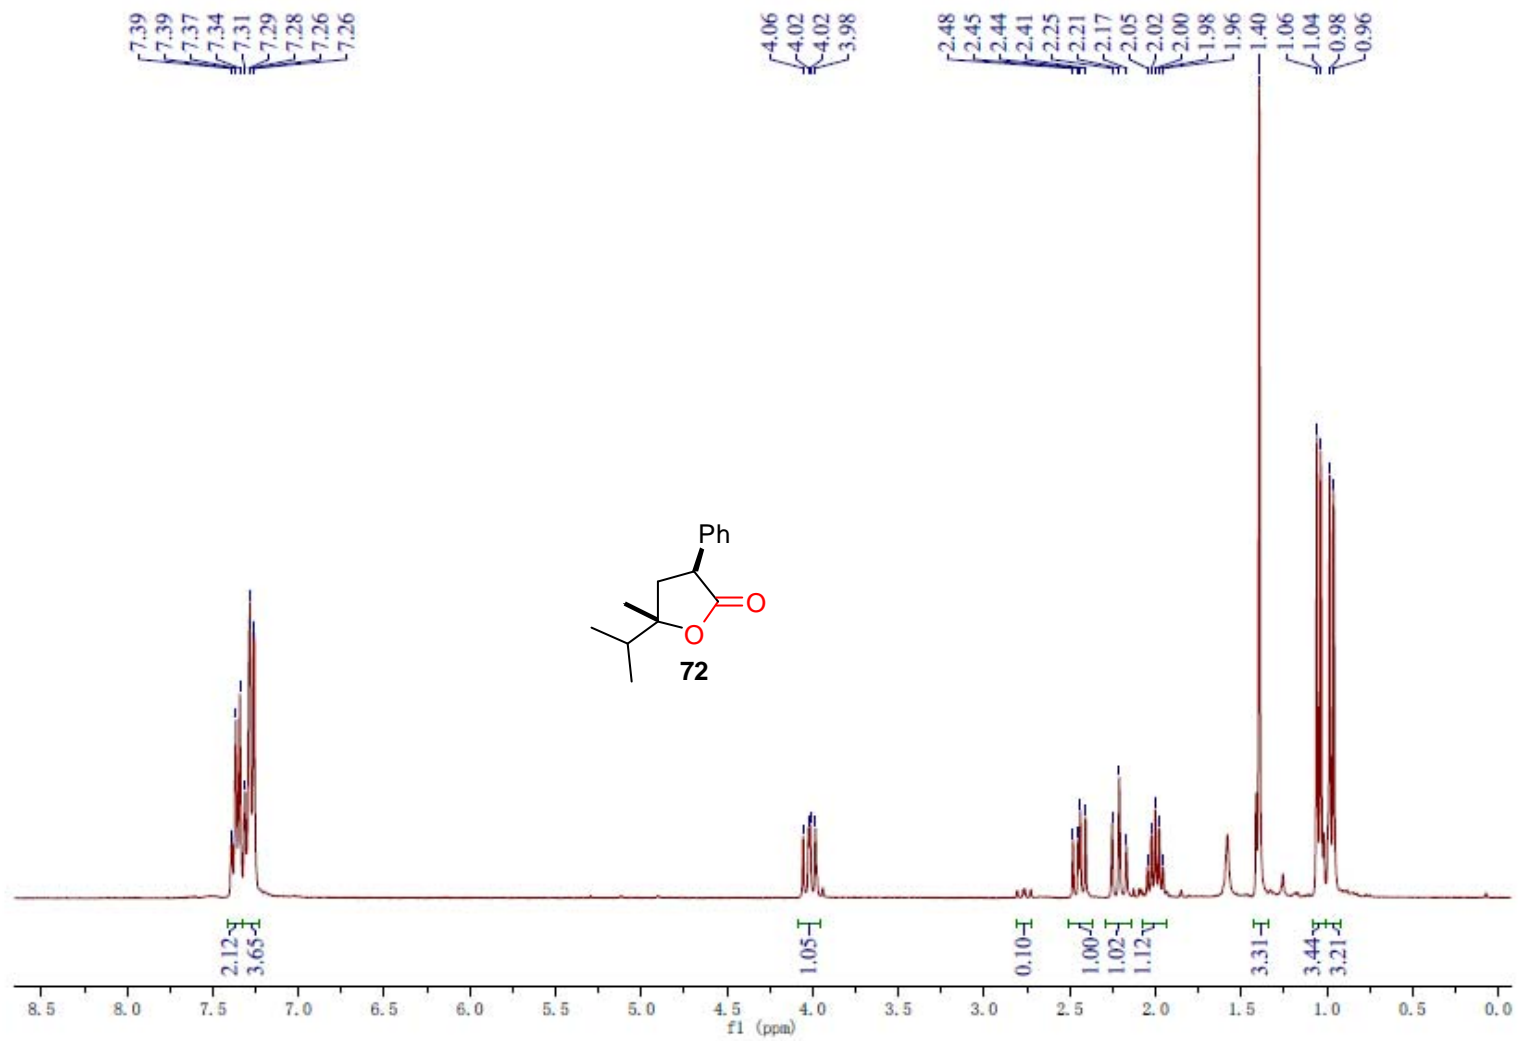

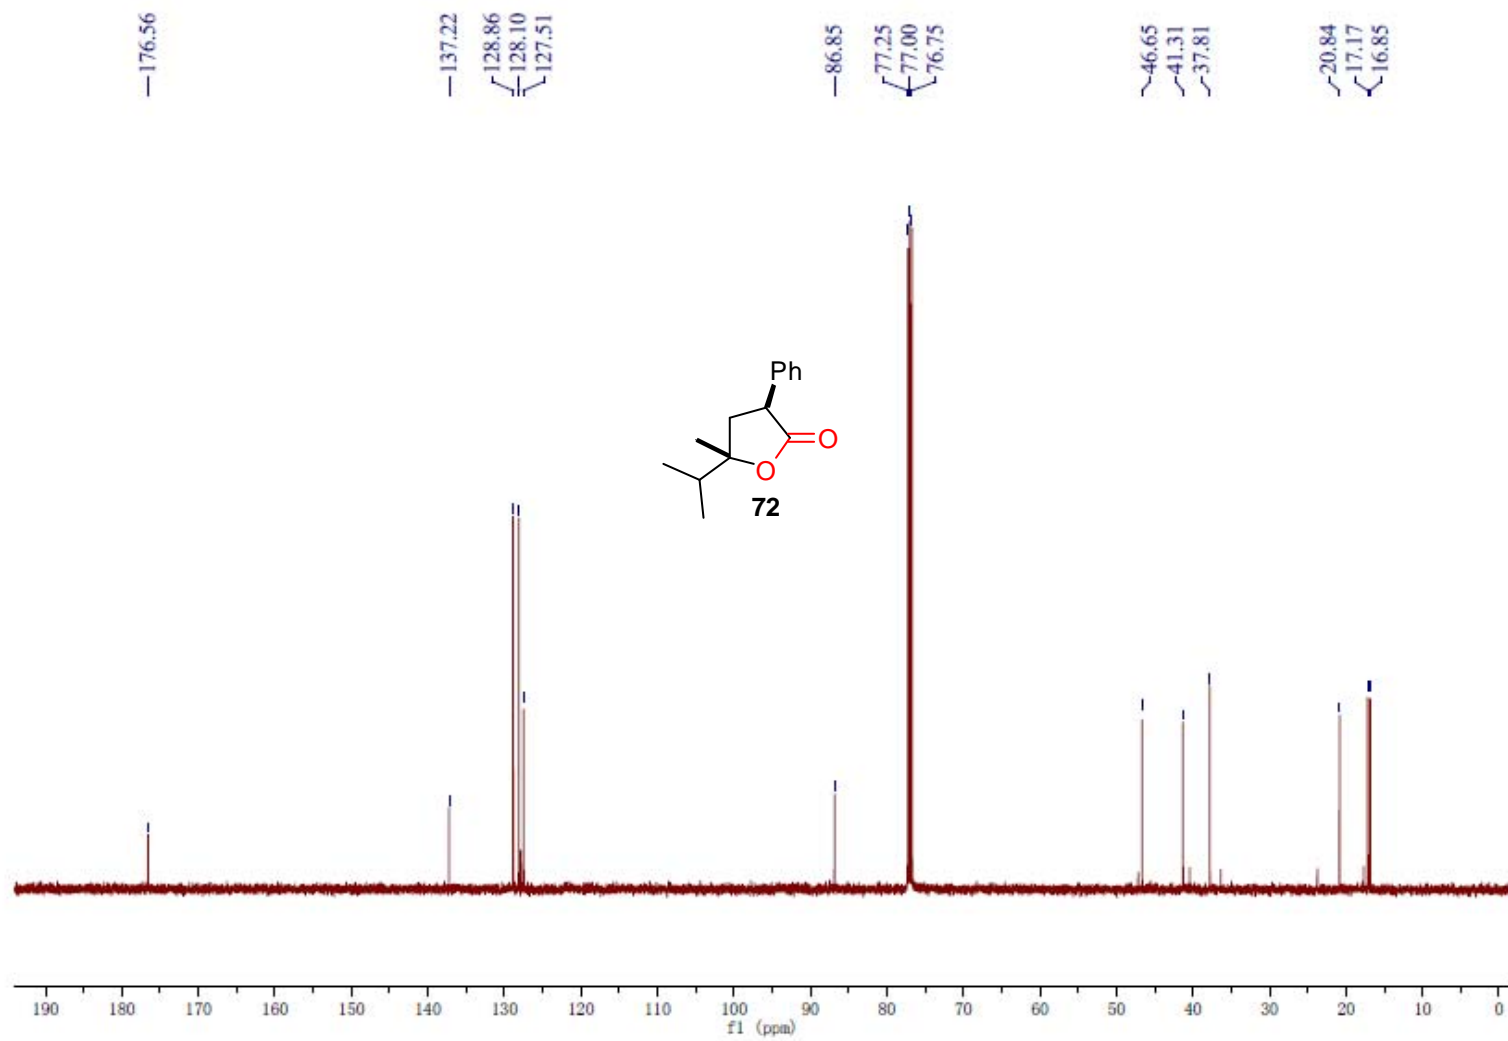

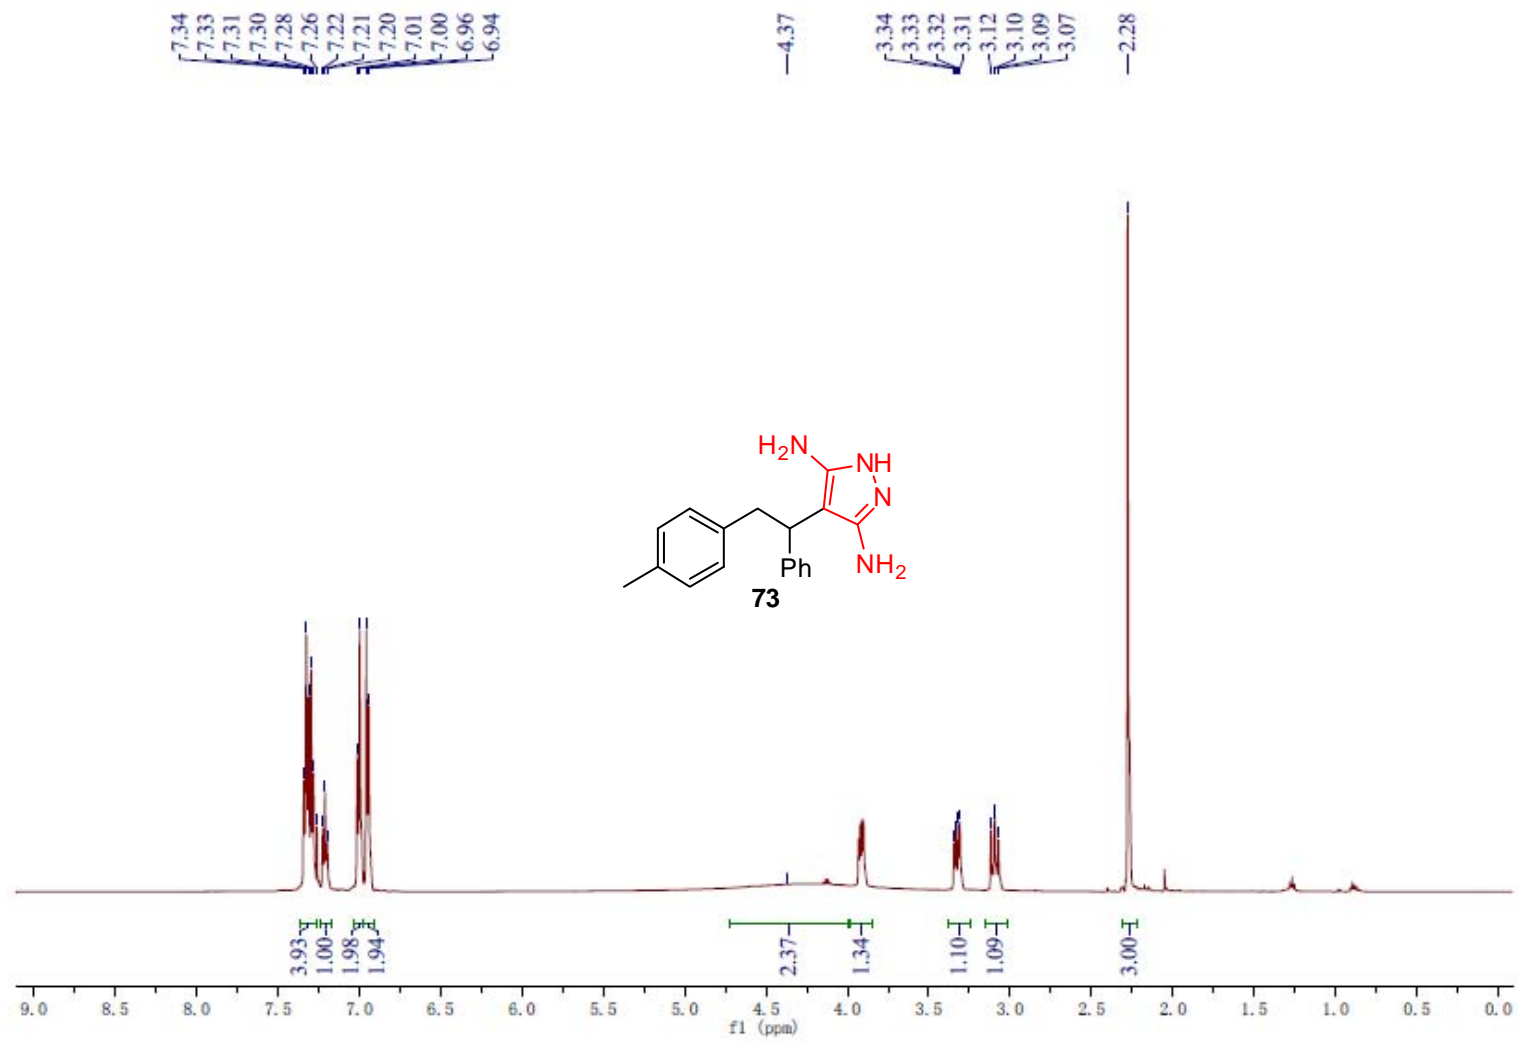

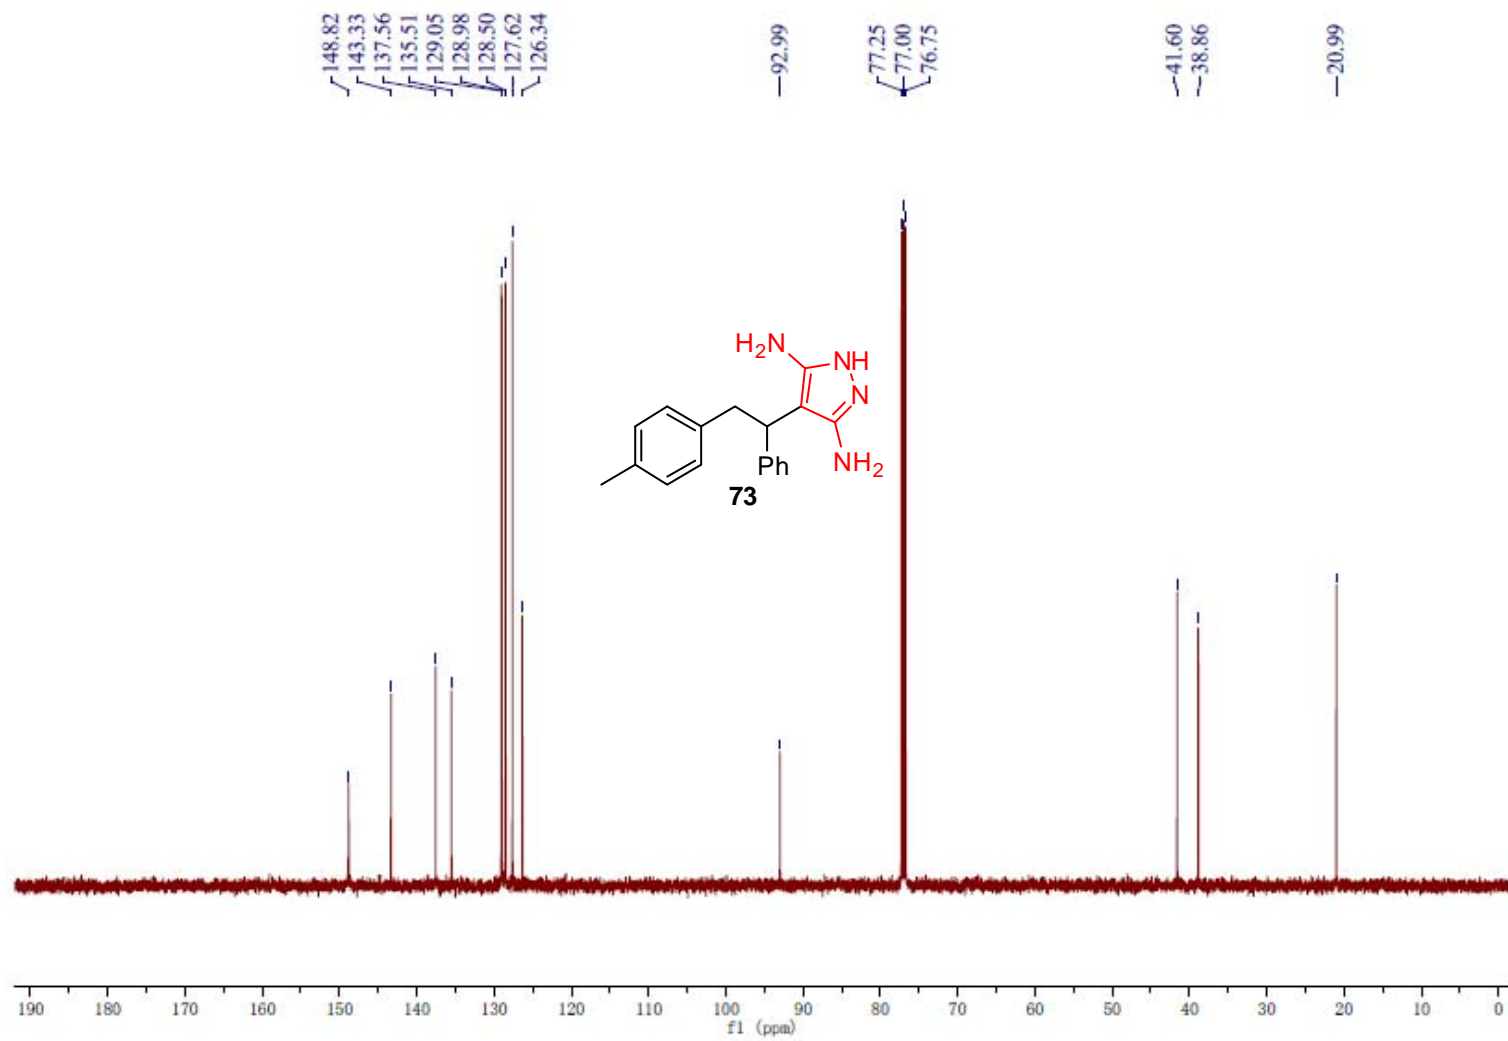

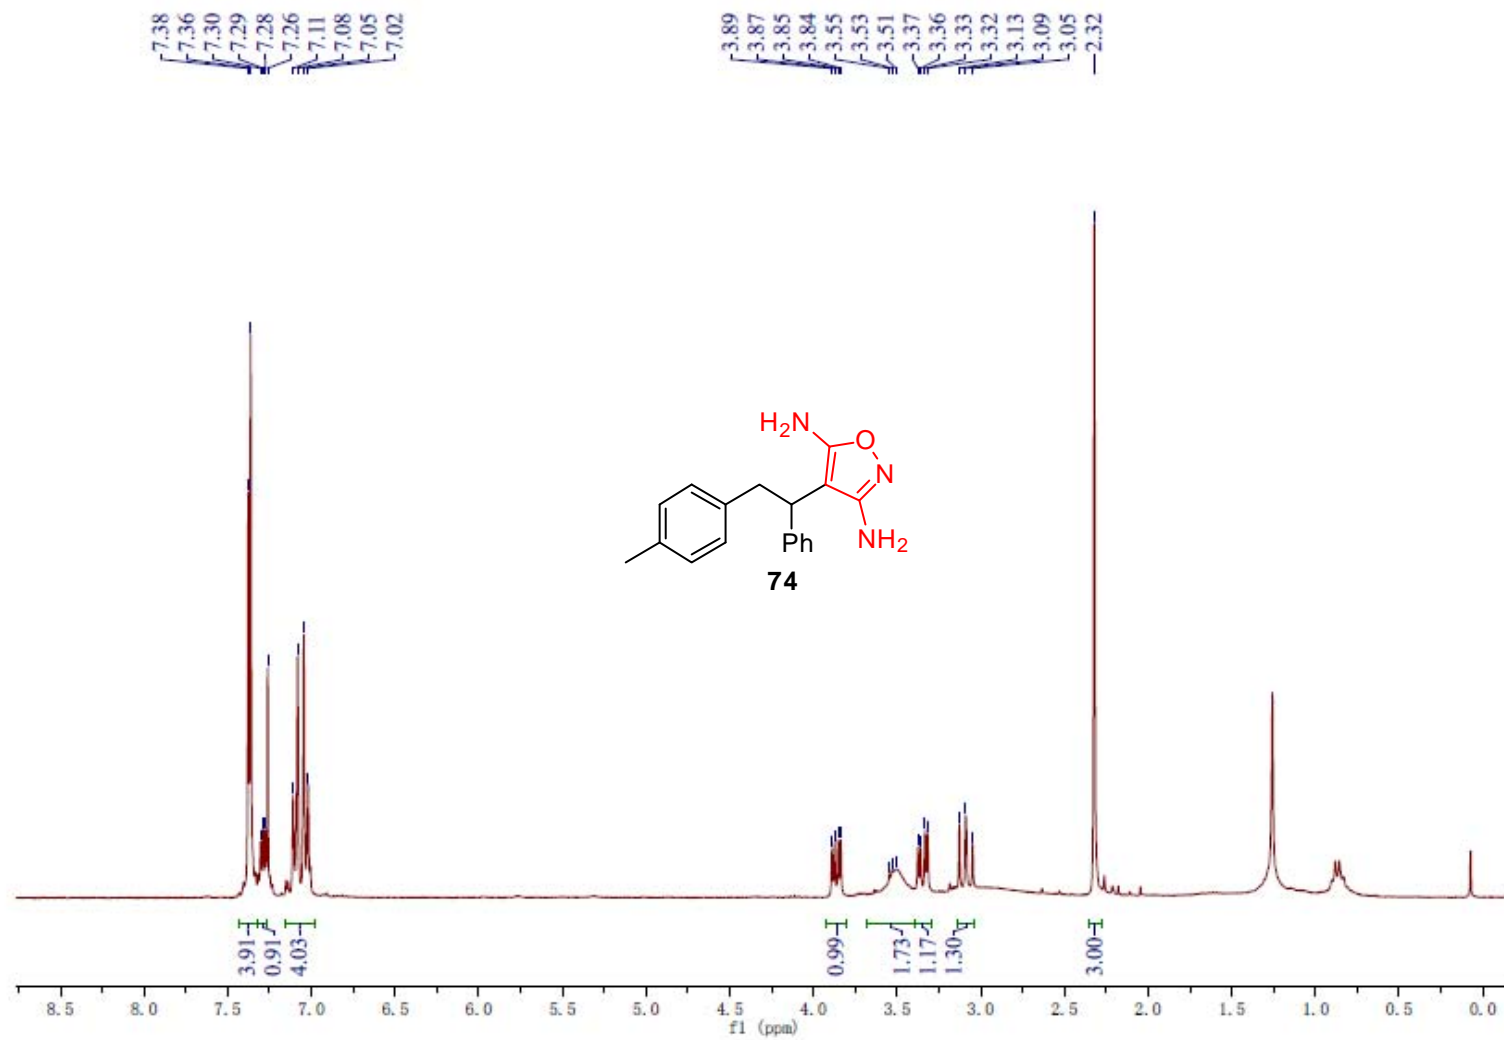

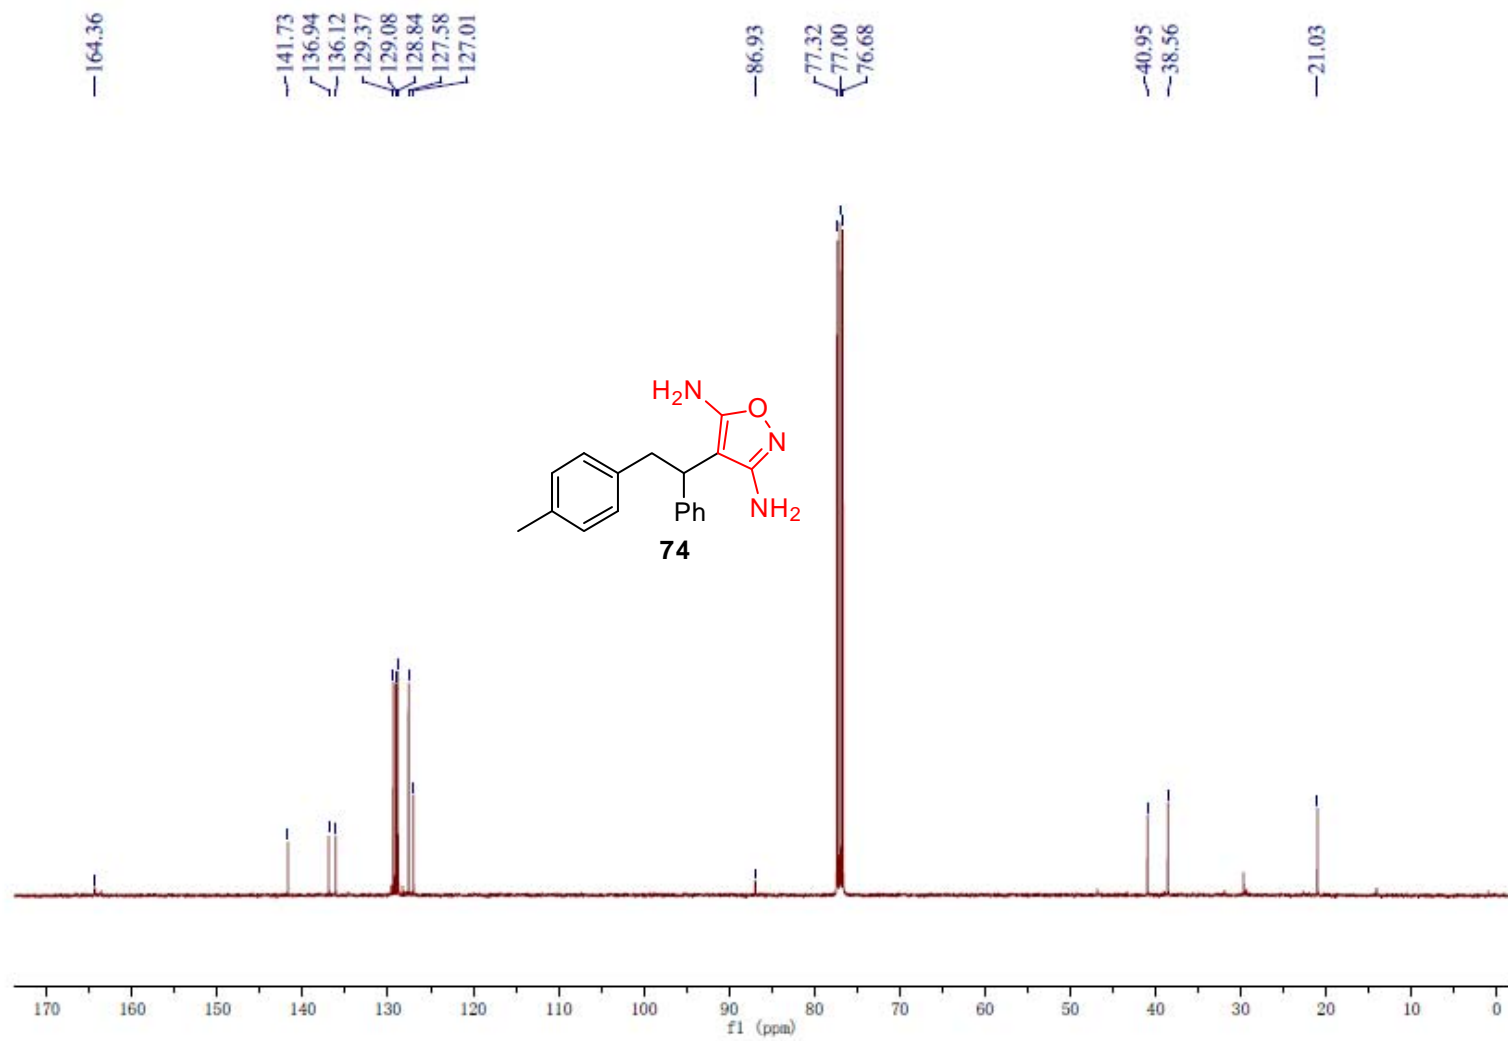

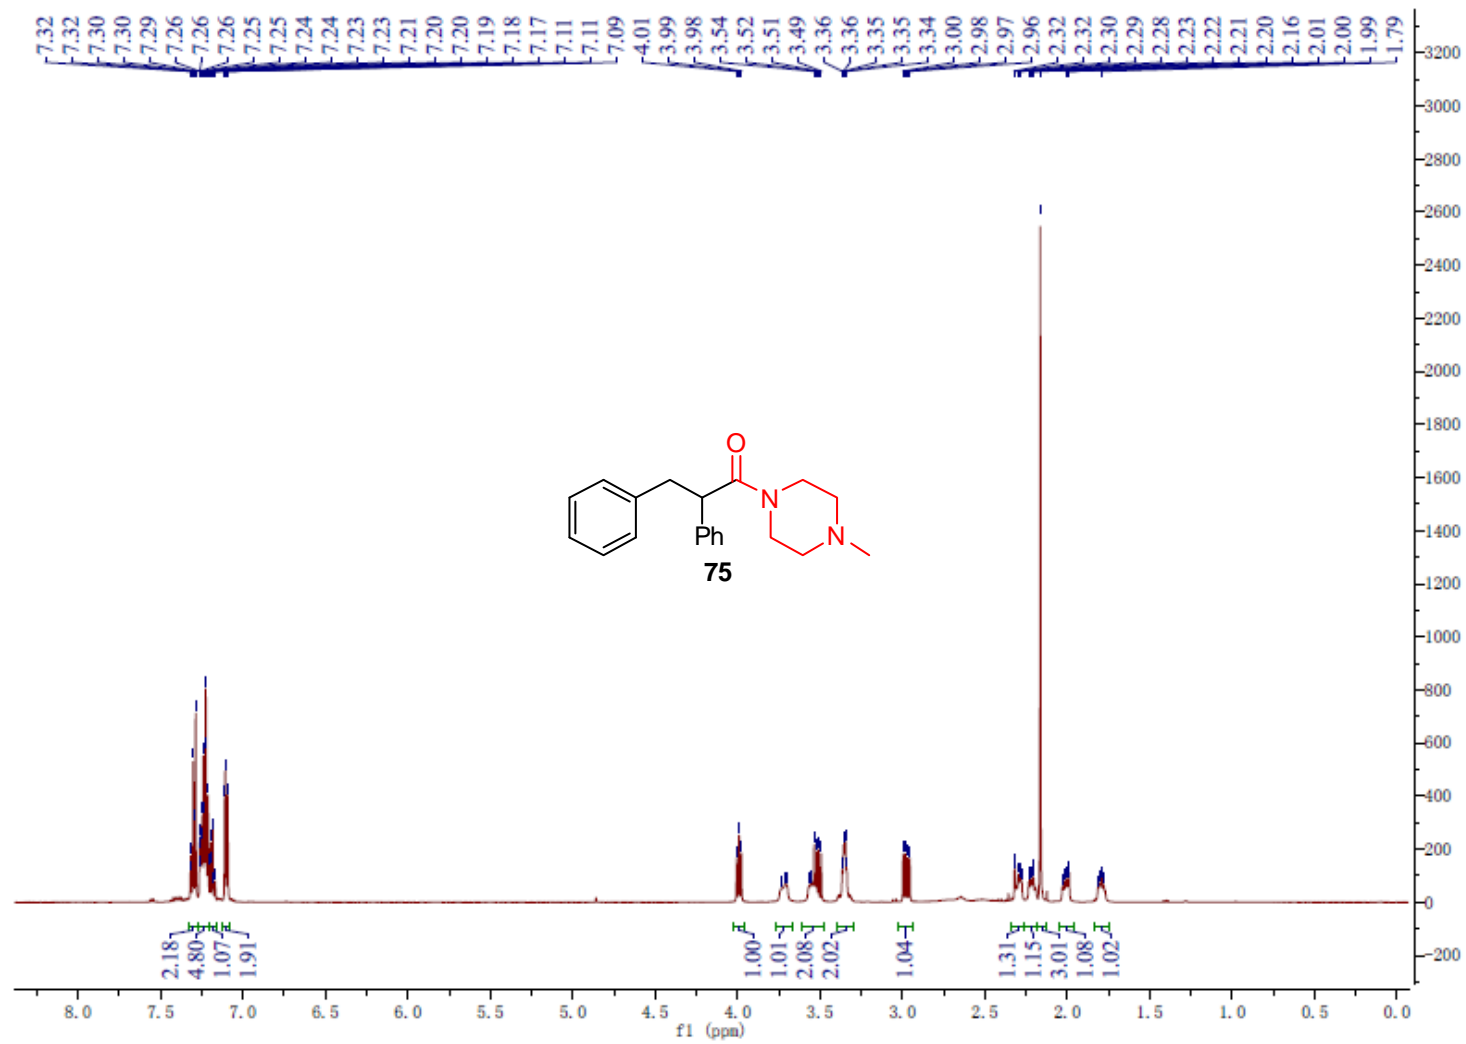



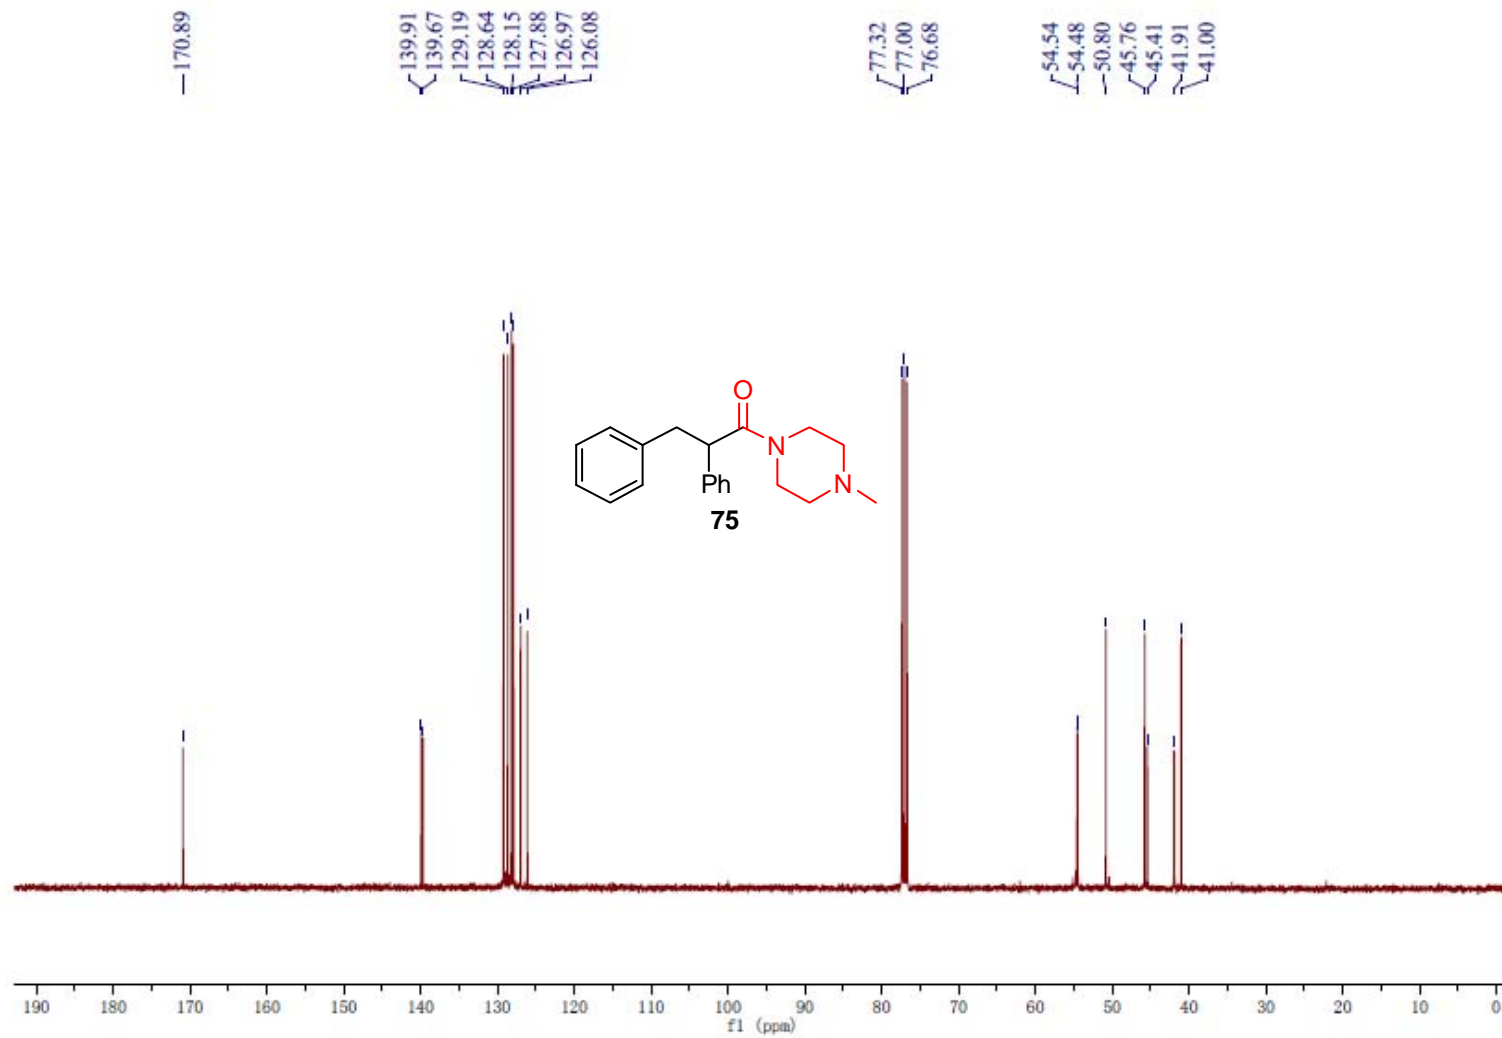

## XIV. NOESY, HMQC, and HMBC Spectra of Representative Compounds

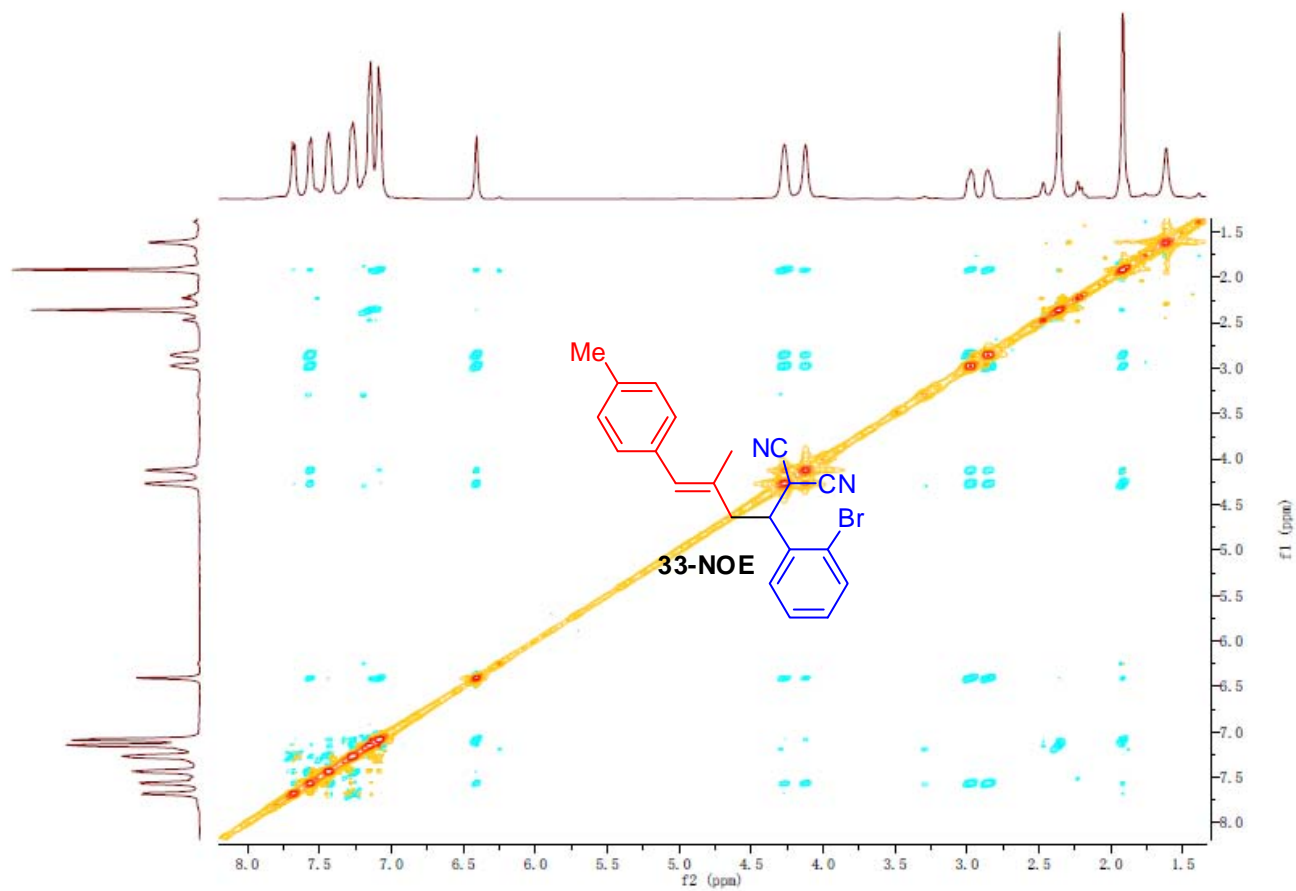

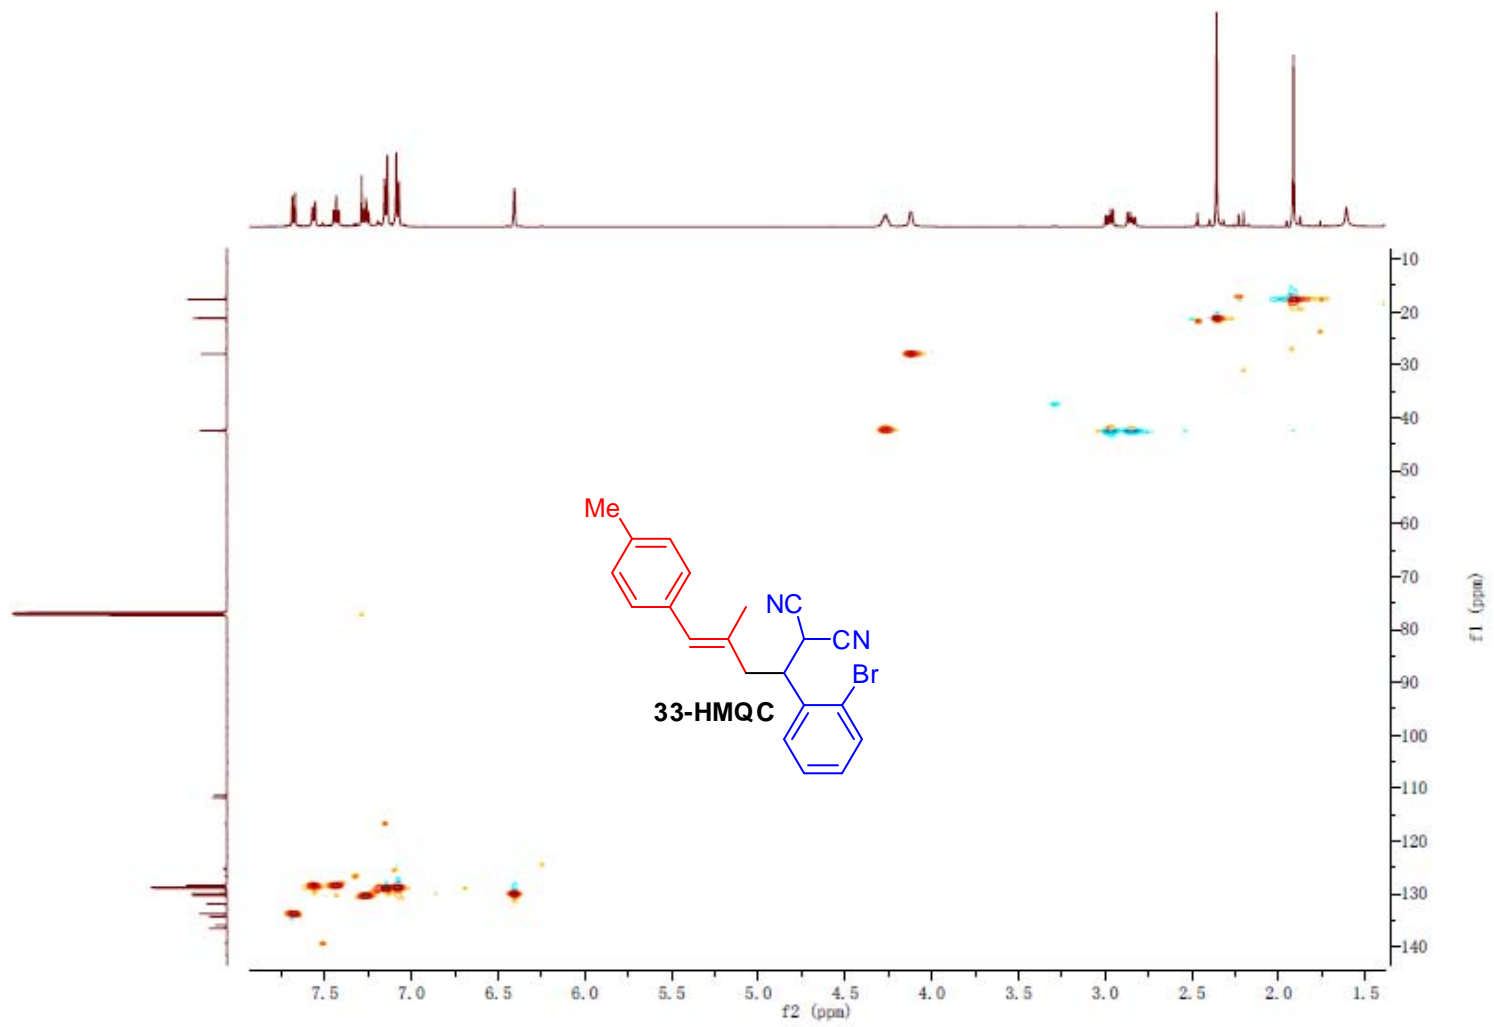

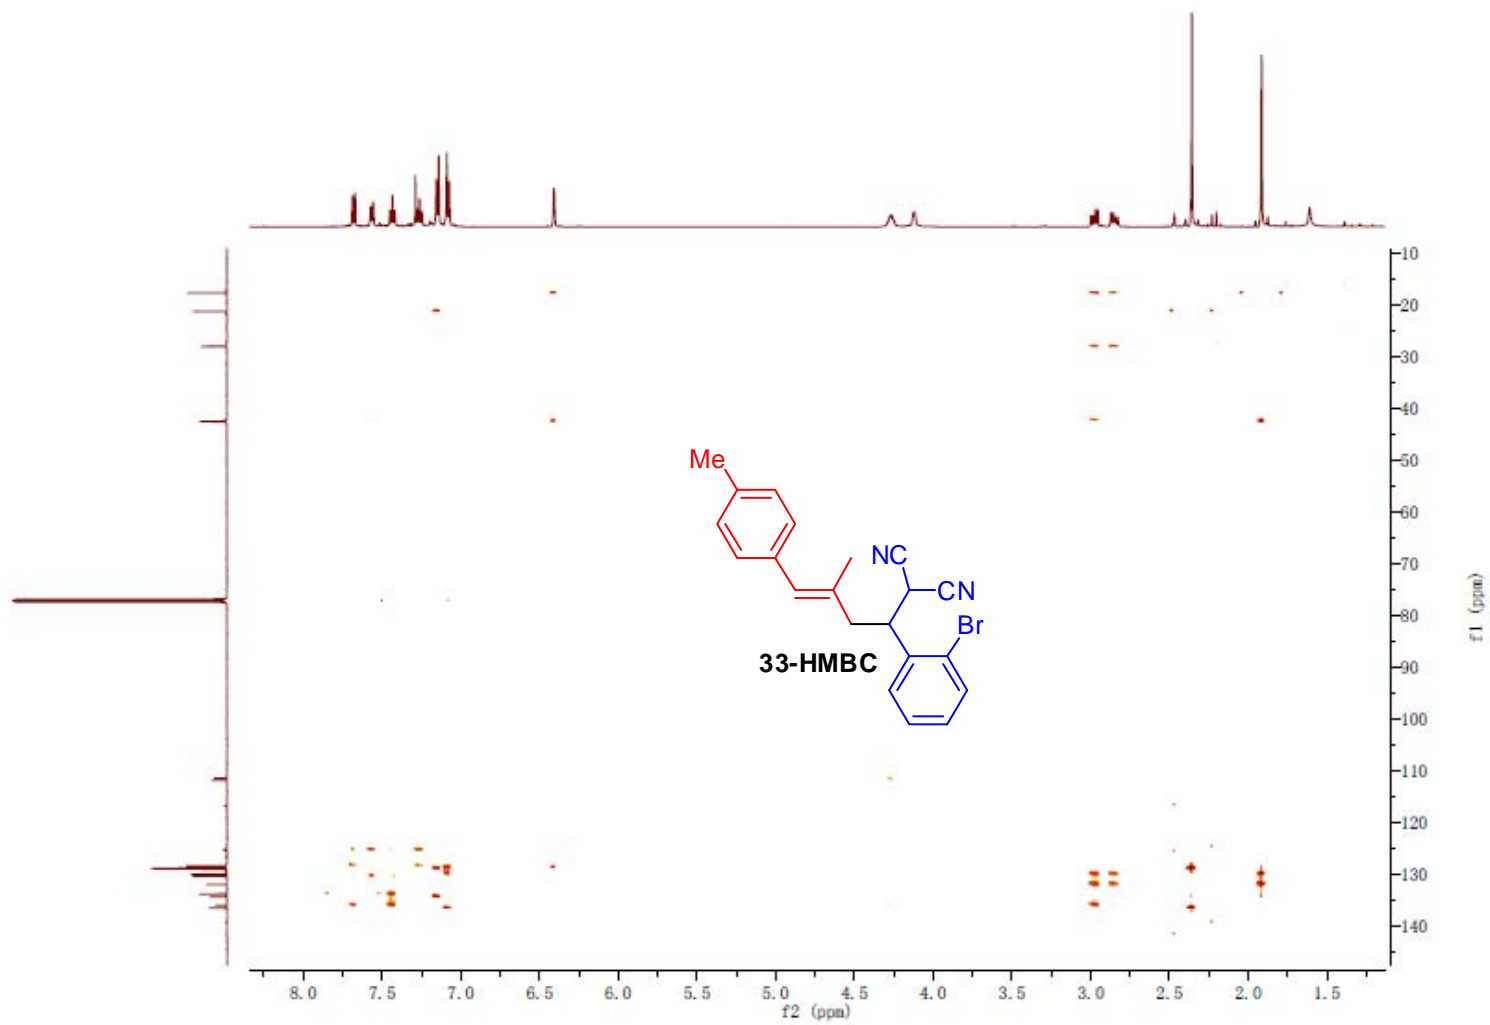

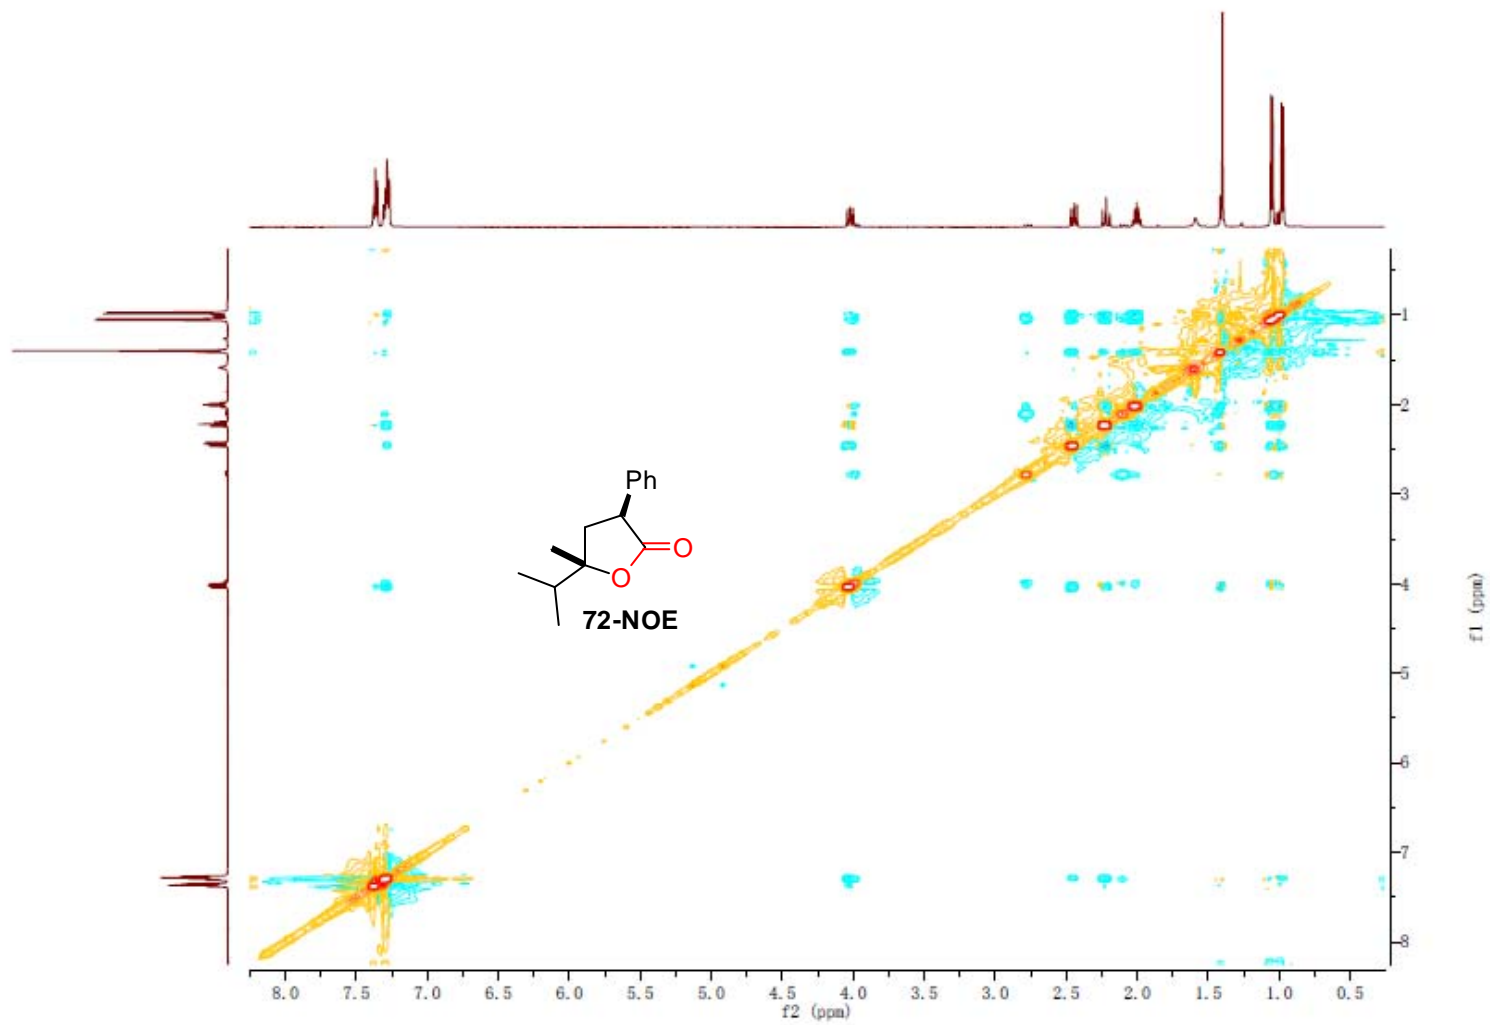

Supplement: c7sc00953d1.pdf [file c7sc00953d1.pdf]
